# Supplementary material for: CCB79 is a primate-specific cilium initiation factor essential to maintain neural progenitor diversity in developing brain tissue
Source: Research Square preprint supplement (doi:10.21203/rs.3.rs-7309668/v1), 2025-10-07
Supplement: Supplementary file 1 [file 2cd744b781a04c6f174c5a8e.xlsx]

## Sheet: All_Clusters
Cluster Num.	Gene names	scores	logfoldchanges	pvals	pvals_adj
0	CENPF	58.2293	4.54298	0	0
0	PTTG1	56.8017	3.94329	0	0
0	CDC20	55.6816	4.67829	0	0
0	TOP2A	55.1964	4.43253	0	0
0	CCNB2	55.1581	4.01887	0	0
0	BIRC5	54.748	3.81729	0	0
0	TPX2	54.3139	4.03462	0	0
0	HMGB2	54.2697	3.2204	0	0
0	CCNB1	53.4611	4.07407	0	0
0	ARL6IP1	53.1543	3.12288	0	0
0	MKI67	51.0532	3.73098	0	0
0	NUSAP1	50.6586	3.46049	0	0
0	DLGAP5	50.4767	3.94903	0	0
0	UBE2C	50.0054	4.12986	0	0
0	NUCKS1	49.5601	1.76316	0	0
0	ASPM	49.3571	3.93198	0	0
0	CKS1B	49.0603	2.87682	0	0
0	KPNA2	47.5263	3.02439	0	0
0	CKS2	47.0434	2.88533	0	0
0	TACC3	46.7218	3.36239	0	0
0	CDCA8	46.4616	3.792	0	0
0	NUF2	45.7934	3.60531	0	0
0	ECT2	45.6306	3.04093	0	0
0	KIF2C	45.569	3.59558	0	0
0	PRR11	45.4288	3.45093	0	0
0	PLK1	45.3363	3.75395	0	0
0	HMMR	45.3023	3.77363	0	0
0	AURKB	44.6631	3.30329	0	0
0	TUBB4B	44.5987	2.5634	0	0
0	GTSE1	44.1772	3.58635	0	0
0	KIF4A	44.1707	3.38356	0	0
0	NEK2	44.1273	4.18434	0	0
0	MAD2L1	43.684	2.80641	0	0
0	BUB1	43.3133	3.55865	0	0
0	RAD21	43.2187	2.02108	0	0
0	SMC4	42.9055	2.44919	0	0
0	NCAPD2	42.5649	2.6271	0	0
0	SGO2	42.4839	3.44867	0	0
0	H2AFX	42.3254	2.35486	0	0
0	CENPE	42.2007	3.47327	0	0
0	PSRC1	41.8705	3.46166	0	0
0	CCNA2	41.5286	3.08987	0	0
0	KIFC1	41.3617	3.07878	0	0
0	TROAP	41.1631	3.39668	0	0
0	KIF11	41.0399	2.96668	0	0
0	PRC1	41.0314	3.09636	0	0
0	CKAP2	40.3741	2.28489	0	0
0	CKAP5	40.1556	1.95202	0	0
0	ANP32E	39.7955	1.78282	0	0
0	H2AFZ	39.5899	1.92498	0	0
0	CDKN3	39.5318	3.59412	0	0
0	CENPA	39.3696	3.64615	0	0
0	PBK	39.191	3.10584	0	0
0	BUB1B	39.1543	2.90742	0	0
0	KNSTRN	39.1198	2.71394	0	0
0	KNL1	39.065	3.13885	0	0
0	TTK	38.8452	3.29927	0	0
0	KIF14	38.6635	3.35752	0	0
0	CKAP2L	38.4257	3.3734	0	0
0	CIT	37.8062	2.6894	0	0
0	CDK1	37.513	2.94319	5.65439e-308	1.59648e-305
0	DEPDC1B	37.4453	2.57427	7.16655e-307	1.9908e-304
0	KIF15	37.3927	2.59352	5.12795e-306	1.40188e-303
0	NDC80	37.1557	2.98166	3.54484e-302	9.53949e-300
0	DTYMK	37.0597	1.97186	1.25369e-300	3.32189e-298
0	HMGB3	36.9566	1.96562	5.7011e-299	1.48773e-296
0	KIF20A	36.7348	3.62598	2.02965e-295	5.21741e-293
0	BUB3	36.3086	1.91334	1.18376e-288	2.99822e-286
0	GAS2L3	36.2476	3.12502	1.08496e-287	2.70817e-285
0	CDCA2	36.2158	3.03922	3.43904e-287	8.46151e-285
0	MIS18BP1	36.1536	2.40494	3.26979e-286	7.93177e-284
0	PTMS	36.0393	1.09264	2.02836e-284	4.85201e-282
0	AURKA	35.9466	3.49091	5.72052e-283	1.34965e-280
0	KIF20B	35.9283	2.46427	1.10353e-282	2.56839e-280
0	FOXM1	35.6693	2.5224	1.18233e-278	2.7151e-276
0	NDE1	35.6027	2.54897	1.27033e-277	2.8788e-275
0	KIF23	35.5992	2.8324	1.43986e-277	3.2206e-275
0	LBR	35.4372	1.6022	4.5614e-275	1.00719e-272
0	RANGAP1	35.2062	2.1752	1.60905e-271	3.50793e-269
0	SGO1	35.1404	2.94278	1.62694e-270	3.5026e-268
0	STMN1	35.12	1.50806	3.3437e-270	7.1097e-268
0	GPSM2	34.6524	2.69909	4.10747e-263	8.62719e-261
0	KIF22	34.6149	2.01181	1.50924e-262	3.13176e-260
0	NCAPG	34.4667	2.53816	2.53307e-260	5.1937e-258
0	HNRNPA2B1	34.4145	0.949297	1.52999e-259	3.10013e-257
0	INCENP	34.2624	2.70576	2.8485e-257	5.70463e-255
0	HP1BP3	33.9419	1.39434	1.60534e-252	3.17802e-250
0	PIF1	33.938	3.61058	1.83651e-252	3.59434e-250
0	CDC25B	33.8678	2.72182	1.98463e-251	3.8406e-249
0	TMPO	33.6633	1.46241	1.99464e-248	3.81708e-246
0	CDCA3	33.2735	3.34706	9.34605e-243	1.76887e-240
0	PIMREG	32.5801	2.92344	7.844e-233	1.46845e-230
0	HJURP	32.3218	2.75951	3.45994e-229	6.40758e-227
0	DEPDC1	32.1729	3.08678	4.22338e-227	7.73822e-225
0	CEP55	32.1392	3.3046	1.24828e-226	2.26306e-224
0	LMNB1	31.997	1.5606	1.20121e-224	2.15505e-222
0	TUBA1C	31.8396	3.13341	1.83296e-222	3.25454e-220
0	CEP70	31.4033	1.97158	1.82346e-216	3.20464e-214
0	MZT1	31.3776	1.84598	4.09362e-216	7.12165e-214
0	SMC2	31.2786	1.84958	9.1184e-215	1.57046e-212
0	KIF18A	31.1552	2.80041	4.31383e-213	7.35614e-211
0	HDGF	31.0346	1.26156	1.84094e-211	3.10848e-209
0	CENPW	30.8235	1.97511	1.26741e-208	2.11929e-206
0	G2E3	30.8138	1.85868	1.71196e-208	2.8351e-206
0	H1FX	30.4435	1.04351	1.46213e-203	2.39831e-201
0	RTKN2	30.4313	2.31516	2.11791e-203	3.44121e-201
0	FAM83D	30.3929	3.13045	6.82206e-203	1.0981e-200
0	CALM2	30.1622	1.09691	7.41145e-200	1.18192e-197
0	NMU	30.157	2.0962	8.69142e-200	1.37332e-197
0	TRIM59	30.1116	2.16385	3.42e-199	5.35479e-197
0	CDC25C	29.9883	2.85984	1.394e-197	2.16297e-195
0	RBMX	29.8489	1.15564	9.06912e-196	1.39462e-193
0	ILF2	29.4709	1.107	6.79699e-191	1.03597e-188
0	CCDC34	29.2017	1.63551	1.84334e-187	2.7849e-185
0	LSM5	29.0799	1.5294	6.44266e-186	9.64887e-184
0	PARPBP	29.0196	2.31956	3.72203e-185	5.52625e-183
0	RNF26	28.9743	2.05272	1.38738e-184	2.04229e-182
0	DBF4	28.6496	1.82115	1.62084e-180	2.36574e-178
0	MXD3	28.6456	2.59878	1.81845e-180	2.63186e-178
0	SPC25	28.6325	2.11945	2.6513e-180	3.80528e-178
0	CCDC18	28.3864	2.1094	2.97955e-177	4.24106e-175
0	CCNF	28.3789	2.54221	3.68467e-177	5.20173e-175
0	SPAG5	28.3727	2.18335	4.38943e-177	6.14627e-175
0	MARCKS	28.1164	0.845329	6.17747e-174	8.58021e-172
0	ANLN	28.0575	2.31023	3.23826e-173	4.4618e-171
0	ARHGAP11A	27.9777	2.47162	3.03437e-172	4.1477e-170
0	KIF18B	27.6003	2.46785	1.10248e-167	1.49512e-165
0	JPT1	27.4156	1.55904	1.78798e-165	2.40581e-163
0	APOLD1	27.3397	4.06328	1.43099e-164	1.91054e-162
0	SAPCD2	26.3364	3.01581	7.34954e-153	9.73701e-151
0	OIP5	26.336	2.1288	7.42906e-153	9.76723e-151
0	HSP90B1	26.1906	1.30846	3.40065e-151	4.43708e-149
0	UBB	26.1796	1.05027	4.53285e-151	5.86987e-149
0	ADD3	26.1736	1.34866	5.30549e-151	6.81914e-149
0	SPA17	25.7185	1.63001	7.2614e-146	9.26393e-144
0	DCXR	25.4383	1.27699	9.5105e-143	1.19562e-140
0	NUDCD2	25.3951	1.3287	2.85708e-142	3.56576e-140
0	NCAPH	25.3531	2.32283	8.31406e-142	1.03017e-139
0	CENPN	25.2832	1.8118	4.88346e-141	6.00771e-139
0	SEPHS1	25.1359	1.32114	2.01708e-139	2.46385e-137
0	UBE2T	25.042	1.62629	2.13387e-138	2.58814e-136
0	ARHGAP19	24.832	2.0048	4.04559e-136	4.87253e-134
0	PHGDH	24.7195	1.15091	6.59844e-135	7.89201e-133
0	SUN2	24.6913	2.00472	1.32645e-134	1.57555e-132
0	CALM3	24.6551	0.924406	3.24805e-134	3.83159e-132
0	IQGAP3	24.3882	2.53711	2.28148e-131	2.67305e-129
0	TUBB	24.2928	1.06798	2.33607e-130	2.71852e-128
0	BANF1	24.1564	1.13469	6.39621e-129	7.39342e-127
0	BORA	23.9566	2.33102	7.88825e-127	9.05728e-125
0	EZR	23.7742	1.21615	6.18039e-125	7.04932e-123
0	ZWINT	23.6681	1.49977	7.69077e-124	8.71435e-122
0	SPC24	23.5704	1.77711	7.76102e-123	8.73647e-121
0	ESPL1	23.563	2.44453	9.22626e-123	1.03184e-120
0	SCLT1	23.3332	1.54634	2.04271e-120	2.26978e-118
0	CIP2A	23.3112	1.82393	3.41072e-120	3.76557e-118
0	PLIN3	23.2666	1.46028	9.66647e-120	1.06042e-117
0	ODF2	22.9977	1.31315	4.9132e-117	5.35569e-115
0	SRSF3	22.8919	0.871838	5.59238e-116	6.05771e-114
0	DYNLL1	22.8894	1.35705	5.92265e-116	6.37536e-114
0	TMSB15A	22.8367	0.997406	1.98001e-115	2.11812e-113
0	EMC9	22.6395	1.68927	1.77153e-113	1.88339e-111
0	BRD8	22.6337	1.0942	2.01871e-113	2.13303e-111
0	SFPQ	22.5469	1.1393	1.44036e-112	1.50347e-110
0	KMT5A	22.465	1.4964	9.1389e-112	9.48189e-110
0	DEK	22.4562	1.19996	1.11377e-111	1.14865e-109
0	MND1	22.0673	1.47414	6.51873e-108	6.68286e-106
0	TOP1	22.0619	0.834426	7.34759e-108	7.48802e-106
0	CEP128	22.0416	1.51077	1.15095e-107	1.16605e-105
0	CDK5RAP2	22.0403	1.0921	1.1838e-107	1.19232e-105
0	COX8A	22.0393	0.956679	1.21029e-107	1.21191e-105
0	ID3	22.015	1.5363	2.06751e-107	2.05831e-105
0	HNRNPR	21.7063	0.944278	1.78973e-104	1.7614e-102
0	PNRC2	21.6642	1.11408	4.46166e-104	4.36609e-102
0	ID1	21.6439	1.53448	6.93226e-104	6.74544e-102
0	DBF4B	21.4067	1.63336	1.15827e-101	1.12072e-99
0	ARHGEF39	21.3418	2.76169	4.64233e-101	4.46676e-99
0	CEP135	21.246	1.36928	3.58868e-100	3.43377e-98
0	TNFAIP8L1	21.2235	2.84116	5.80054e-100	5.51949e-98
0	ACBD7	21.1309	2.04478	4.13606e-99	3.91403e-97
0	DIAPH3	21.1059	1.81433	7.01828e-99	6.60523e-97
0	PHF19	21.0833	1.68461	1.13173e-98	1.05934e-96
0	ANP32B	21.0724	1.02657	1.42415e-98	1.32585e-96
0	CBX3	21.0486	0.87469	2.35292e-98	2.17873e-96
0	CENPU	20.988	1.24739	8.43559e-98	7.72798e-96
0	CENPL	20.9252	1.99907	3.15665e-97	2.87656e-95
0	ACTB	20.8199	0.631674	2.86076e-96	2.59321e-94
0	MIS18A	20.7747	1.31413	7.33663e-96	6.61565e-94
0	SPDL1	20.6568	1.91953	8.47429e-95	7.6017e-93
0	RRM2	20.5693	1.29798	5.17006e-94	4.61368e-92
0	ENY2	20.5058	0.831482	1.91192e-93	1.69737e-91
0	RHNO1	20.4826	1.30335	3.07664e-93	2.71738e-91
0	HMGN3	20.4774	0.811274	3.42287e-93	3.00776e-91
0	HNRNPK	20.4268	0.837546	9.65921e-93	8.4447e-91
0	DDX39A	20.3829	1.22702	2.37382e-92	2.06486e-90
0	NUDT1	20.3749	1.25281	2.7933e-92	2.41754e-90
0	DCTN3	20.3386	0.952068	5.85421e-92	5.04136e-90
0	HMG20B	20.3192	1.1476	8.69015e-92	7.44629e-90
0	UBALD2	20.3005	1.823	1.27195e-91	1.08449e-89
0	HSP90AA1	20.2377	0.878194	4.55944e-91	3.86834e-89
0	EIF4G2	20.1655	0.830186	1.96839e-90	1.66184e-88
0	ZMYM1	20.0881	1.34087	9.38582e-90	7.88547e-88
0	CDC27	19.9541	1.13413	1.38033e-88	1.15405e-86
0	POC1A	19.824	1.88584	1.84989e-87	1.53916e-85
0	SKA3	19.7861	1.71973	3.92069e-87	3.24645e-85
0	DCAF7	19.565	0.814849	3.07213e-85	2.53164e-83
0	RHEB	19.2643	0.980806	1.07088e-82	8.78272e-81
0	CDK19	19.2233	1.22411	2.36147e-82	1.92756e-80
0	PSMA4	19.1387	0.815937	1.2031e-81	9.77405e-80
0	TXNDC12	19.1326	0.935975	1.35274e-81	1.09382e-79
0	SET	19.1275	0.726692	1.48947e-81	1.19874e-79
0	YBX1	19.1172	0.772754	1.81751e-81	1.45595e-79
0	NCAPG2	19.0978	1.21404	2.63542e-81	2.10138e-79
0	ERH	19.0482	0.812266	6.79783e-81	5.39535e-79
0	ODC1	19.0121	0.705043	1.3552e-80	1.07067e-78
0	DNAJA1	18.9992	0.734978	1.73274e-80	1.36269e-78
0	CNIH4	18.9787	1.10909	2.55883e-80	2.00322e-78
0	GNG5	18.9193	1.14289	7.90805e-80	6.16292e-78
0	KIF5B	18.8559	0.693162	2.63032e-79	2.04063e-77
0	ACTG1	18.7867	0.592905	9.70487e-79	7.49538e-77
0	CCNA1	18.7619	3.16277	1.54659e-78	1.18915e-76
0	CNTRL	18.7166	0.997767	3.62365e-78	2.77378e-76
0	KHDRBS1	18.6872	0.730652	6.29664e-78	4.79854e-76
0	HNRNPM	18.6858	0.82702	6.46184e-78	4.90275e-76
0	GPX4	18.6472	0.683159	1.33124e-77	1.00561e-75
0	CCDC167	18.5361	1.02388	1.0564e-76	7.94518e-75
0	MELK	18.4166	1.7259	9.67503e-76	7.24491e-74
0	MORF4L2	18.4065	0.847043	1.16437e-75	8.68134e-74
0	EXOSC8	18.4041	1.02735	1.2185e-75	9.04582e-74
0	KRTCAP2	18.3855	0.831432	1.71751e-75	1.26413e-73
0	NEIL3	18.3827	1.97158	1.80592e-75	1.32355e-73
0	GLRX5	18.3323	0.866769	4.57457e-75	3.33847e-73
0	CDK2AP1	18.3144	0.89966	6.35147e-75	4.61567e-73
0	ID2	18.2661	1.15314	1.53949e-74	1.11406e-72
0	CDCA5	18.2269	1.6128	3.15843e-74	2.27605e-72
0	SAE1	18.2253	0.890506	3.25088e-74	2.33292e-72
0	SKA2	18.191	1.48719	6.07889e-74	4.34426e-72
0	DDAH2	18.1056	0.695553	2.87948e-73	2.04931e-71
0	TYMS	18.0766	0.9505	4.87446e-73	3.45485e-71
0	SMC3	18.0554	0.791565	7.15888e-73	5.05317e-71
0	MDC1	18.0492	1.05441	7.99787e-73	5.62234e-71
0	HMGN1	18.0273	0.752583	1.19004e-72	8.3317e-71
0	TUBB6	18.0186	2.2684	1.3923e-72	9.7083e-71
0	EPB41L2	17.9753	1.11967	3.04249e-72	2.11294e-70
0	BCL2L12	17.9734	1.2057	3.14623e-72	2.1762e-70
0	CENPH	17.9077	1.02928	1.02686e-71	7.07423e-70
0	PHACTR4	17.9056	0.737726	1.06731e-71	7.32364e-70
0	UQCRFS1	17.8948	1.0916	1.29389e-71	8.84312e-70
0	ORC6	17.868	0.970489	2.09403e-71	1.42551e-69
0	SERBP1	17.8045	0.676569	6.52591e-71	4.42503e-69
0	ARHGAP11B	17.738	2.99548	2.13344e-70	1.44095e-68
0	STIL	17.7365	1.7166	2.18994e-70	1.47333e-68
0	SNRPD1	17.6543	0.922253	9.42911e-70	6.31897e-68
0	PSIP1	17.6024	0.774868	2.36062e-69	1.57585e-67
0	RUVBL2	17.5329	0.986332	8.03182e-69	5.34101e-67
0	HIST1H4C	17.4977	1.5359	1.4913e-68	9.8787e-67
0	CENPI	17.4953	1.54398	1.55469e-68	1.02592e-66
0	ANAPC11	17.4	0.713496	8.24369e-68	5.41912e-66
0	C21orf58	17.386	1.27891	1.05258e-67	6.893e-66
0	FBXO5	17.2872	1.36992	5.87008e-67	3.82956e-65
0	HSPA8	17.2616	0.648111	9.1476e-67	5.94525e-65
0	WEE1	17.176	1.00198	4.01336e-66	2.59858e-64
0	NUP37	17.1687	1.21558	4.55231e-66	2.9365e-64
0	HNRNPU	17.1612	0.543337	5.18068e-66	3.32936e-64
0	CHEK2	17.1362	1.39912	7.97513e-66	5.10616e-64
0	TUBA1B	17.0694	1.93773	2.50929e-65	1.60065e-63
0	UBC	17.0626	0.858486	2.81536e-65	1.78926e-63
0	SSNA1	17.0442	1.13765	3.85875e-65	2.44336e-63
0	LMNB2	17.0268	0.916374	5.20009e-65	3.28063e-63
0	ANP32A	16.9846	0.869271	1.06725e-64	6.7085e-63
0	NDUFB4	16.9514	0.854982	1.87976e-64	1.17301e-62
0	HNRNPH3	16.951	0.598358	1.89229e-64	1.17657e-62
0	TMEM256	16.9241	0.94138	2.99036e-64	1.85262e-62
0	TPR	16.8995	0.638307	4.54112e-64	2.80329e-62
0	UBE2E3	16.8942	0.636661	4.96378e-64	3.05326e-62
0	ACTL6A	16.793	0.886583	2.74788e-63	1.67825e-61
0	NIPBL	16.7726	0.687909	3.87496e-63	2.34994e-61
0	CTCF	16.7515	0.786296	5.52201e-63	3.33704e-61
0	DARS2	16.7108	1.40655	1.09377e-62	6.58673e-61
0	PPP2R5C	16.7072	0.803309	1.16097e-62	6.96705e-61
0	HMGN5	16.7064	1.08876	1.17776e-62	7.04322e-61
0	C17orf49	16.7052	0.855986	1.20224e-62	7.16479e-61
0	NDC1	16.6316	1.06783	4.11483e-62	2.44379e-60
0	SNRPE	16.6242	0.776048	4.6558e-62	2.75556e-60
0	UCP2	16.5884	0.9607	8.45226e-62	4.95147e-60
0	RAB13	16.575	0.807276	1.05745e-61	6.17372e-60
0	VDAC3	16.5557	0.823835	1.45616e-61	8.47281e-60
0	IFT122	16.551	1.11604	1.57456e-61	9.13085e-60
0	KIAA0586	16.5379	1.17748	1.95744e-61	1.13131e-59
0	RNFT2	16.4307	0.962775	1.15361e-60	6.62286e-59
0	FBXL5	16.3693	0.804504	3.16978e-60	1.81372e-58
0	NRARP	16.3269	0.838974	6.35297e-60	3.62308e-58
0	MAZ	16.3006	0.923581	9.77399e-60	5.55569e-58
0	SHCBP1	16.2823	2.13689	1.31739e-59	7.4636e-58
0	LSM4	16.2539	0.656715	2.09454e-59	1.18277e-57
0	PMF1	16.2455	0.818364	2.40462e-59	1.35343e-57
0	PPIA	16.2325	0.890202	2.97306e-59	1.66792e-57
0	H3F3A	16.2199	0.624528	3.64959e-59	2.04081e-57
0	MICOS10	16.184	0.72868	6.5442e-59	3.6476e-57
0	HNRNPA3	16.1739	0.645356	7.70738e-59	4.28207e-57
0	RAC1	16.1679	0.818418	8.48916e-59	4.70125e-57
0	FRMD4B	16.1439	1.01341	1.25377e-58	6.92104e-57
0	TMEM160	16.0972	1.01415	2.66992e-58	1.46446e-56
0	NDUFC1	16.0023	0.812269	1.23052e-57	6.72802e-56
0	PKP4	15.9924	1.1279	1.44301e-57	7.86488e-56
0	TMSB10	15.9611	0.656471	2.38589e-57	1.29628e-55
0	PPP1CC	15.9054	0.796574	5.81083e-57	3.14717e-55
0	NRF1	15.9043	0.966686	5.91469e-57	3.19337e-55
0	HMGA2	15.8223	0.839709	2.18422e-56	1.17559e-54
0	CSRP2	15.7958	0.904773	3.32594e-56	1.78451e-54
0	PSMD10	15.7877	0.782472	3.77866e-56	2.02111e-54
0	SNRPB	15.7766	0.73786	4.51072e-56	2.4052e-54
0	GTF2A2	15.7447	0.768118	7.46265e-56	3.96695e-54
0	HIST1H1B	15.7276	1.11832	9.7831e-56	5.18444e-54
0	IFT22	15.7211	0.806277	1.0849e-55	5.73169e-54
0	ZCRB1	15.6816	0.828702	2.02164e-55	1.06479e-53
0	CLIC4	15.6691	0.760872	2.45893e-55	1.29116e-53
0	TRIM28	15.6641	0.682555	2.66059e-55	1.3928e-53
0	VRK1	15.6197	0.819749	5.34435e-55	2.78927e-53
0	PPP2R5E	15.6134	0.686839	5.90286e-55	3.07145e-53
0	XRCC6	15.5996	0.702729	7.32662e-55	3.80079e-53
0	GSTP1	15.568	0.656251	1.20075e-54	6.21037e-53
0	ANAPC15	15.5567	0.874341	1.43275e-54	7.38809e-53
0	RBBP7	15.5529	0.678347	1.52124e-54	7.82098e-53
0	NAA38	15.5426	0.74647	1.78631e-54	9.15643e-53
0	LSM3	15.5387	1.27917	1.8971e-54	9.69546e-53
0	MDH1	15.53	1.05478	2.17419e-54	1.10787e-52
0	TUBA1A	15.4908	0.902986	4.00388e-54	2.03419e-52
0	GABPB1	15.4562	0.948796	6.85476e-54	3.47234e-52
0	CCN2	15.4535	1.02429	7.14075e-54	3.6066e-52
0	CENPV	15.4419	0.695226	8.54917e-54	4.30533e-52
0	ILVBL	15.4081	1.02994	1.4437e-53	7.24923e-52
0	ATP5IF1	15.3847	0.696507	2.07225e-53	1.03751e-51
0	MYEF2	15.3645	0.606533	2.83145e-53	1.41351e-51
0	HSD17B11	15.3291	1.4259	4.88527e-53	2.42475e-51
0	DCP2	15.3286	0.804509	4.92631e-53	2.4381e-51
0	PLGRKT	15.3196	1.27261	5.65318e-53	2.78982e-51
0	CENPC	15.2953	1.12115	8.21364e-53	4.04182e-51
0	PRDX1	15.2667	0.637043	1.27392e-52	6.23314e-51
0	UACA	15.2397	1.33885	1.92709e-52	9.40234e-51
0	HINT1	15.2395	0.739295	1.93263e-52	9.40273e-51
0	STK17B	15.2376	1.96352	1.99175e-52	9.66306e-51
0	NDUFA2	15.2251	0.658117	2.41082e-52	1.16633e-50
0	SKA1	15.2211	2.01821	2.56211e-52	1.23606e-50
0	PSMA2	15.2018	0.713896	3.44224e-52	1.65602e-50
0	SNRPG	15.1664	0.845971	5.90215e-52	2.82369e-50
0	DESI2	15.1295	0.889253	1.03462e-51	4.92244e-50
0	RFX4	15.0974	0.834445	1.68559e-51	7.99751e-50
0	MAGOH	15.015	0.705076	5.85324e-51	2.76951e-49
0	MGME1	15.0085	0.924556	6.46055e-51	3.0485e-49
0	YWHAQ	15.0052	0.624175	6.78458e-51	3.19265e-49
0	KRAS	14.9972	0.752386	7.6632e-51	3.59627e-49
0	NSD2	14.9762	0.695484	1.04982e-50	4.91333e-49
0	ECI2	14.9717	0.747545	1.12442e-50	5.24823e-49
0	RNF5	14.9241	0.678919	2.29793e-50	1.06966e-48
0	SNRPB2	14.9087	0.689709	2.89312e-50	1.34308e-48
0	CEP112	14.8992	1.11919	3.33679e-50	1.54488e-48
0	TBCD	14.8956	0.737054	3.51951e-50	1.62511e-48
0	GEN1	14.8951	1.24666	3.54704e-50	1.63344e-48
0	TCP1	14.8948	0.69676	3.56237e-50	1.63613e-48
0	RBM8A	14.8556	0.913432	6.40309e-50	2.93299e-48
0	SUMO2	14.8485	0.663822	7.1102e-50	3.24825e-48
0	ATP5F1B	14.7458	0.566496	3.2735e-49	1.49152e-47
0	H2AFY	14.7269	0.698025	4.32839e-49	1.96696e-47
0	ASF1B	14.7238	1.13403	4.53646e-49	2.05609e-47
0	BLOC1S1	14.7178	0.754842	4.956e-49	2.23448e-47
0	SEM1	14.7094	0.669965	5.61375e-49	2.52443e-47
0	NFYB	14.6036	0.845686	2.66222e-48	1.19405e-46
0	GPC3	14.6004	0.833274	2.79003e-48	1.24812e-46
0	COX6A1	14.5765	0.723462	3.96236e-48	1.76797e-46
0	FAM122B	14.5524	0.894998	5.63851e-48	2.50936e-46
0	PRDX6	14.4664	0.615291	1.97597e-47	8.74863e-46
0	UQCR10	14.4344	0.633991	3.14362e-47	1.38827e-45
0	ZNF695	14.3743	1.30967	7.50455e-47	3.29721e-45
0	HES1	14.3345	0.920036	1.33285e-46	5.84116e-45
0	DMAC1	14.273	0.767081	3.22418e-46	1.40582e-44
0	NAV2	14.2613	0.883822	3.81056e-46	1.6573e-44
0	EIF1	14.2292	0.679654	6.03753e-46	2.61267e-44
0	HSPE1	14.2136	0.647483	7.54539e-46	3.257e-44
0	PSMB3	14.1755	0.922499	1.29971e-45	5.58229e-44
0	USP1	14.137	0.710883	2.24689e-45	9.60253e-44
0	IGF2BP1	14.12	0.607841	2.85999e-45	1.21925e-43
0	BTG3	14.1078	0.736139	3.39882e-45	1.44538e-43
0	MTDH	14.0856	0.621088	4.6538e-45	1.9742e-43
0	PCM1	14.0673	0.503402	6.03515e-45	2.54763e-43
0	IMMP1L	14.0419	0.948618	8.63125e-45	3.63462e-43
0	DKC1	14.0286	0.705499	1.04259e-44	4.37962e-43
0	SNRPC	14.0279	0.572802	1.05271e-44	4.41141e-43
0	NUDC	14.0092	0.531444	1.36936e-44	5.72437e-43
0	B2M	14.0069	0.763484	1.41523e-44	5.90181e-43
0	COX6C	14.0005	0.632135	1.5476e-44	6.43823e-43
0	CCT4	13.9733	0.585866	2.26723e-44	9.4093e-43
0	TECR	13.9509	0.725664	3.10726e-44	1.28645e-42
0	SEPTIN7	13.9382	0.724707	3.71212e-44	1.53318e-42
0	CMC2	13.9309	0.801581	4.10948e-44	1.69324e-42
0	YWHAB	13.9161	0.707721	5.05505e-44	2.07293e-42
0	RCC1	13.9149	1.0888	5.14672e-44	2.10551e-42
0	FZR1	13.9086	0.894495	5.61855e-44	2.29309e-42
0	TMBIM6	13.8493	0.956796	1.285e-43	5.23203e-42
0	SLC4A8	13.8334	0.79513	1.60246e-43	6.49394e-42
0	GKAP1	13.8212	0.800804	1.90002e-43	7.6817e-42
0	DBI	13.8082	0.771661	2.27491e-43	9.17584e-42
0	ITGB3BP	13.8009	0.770087	2.5177e-43	1.01314e-41
0	GTF3C6	13.7889	0.725108	2.97449e-43	1.19416e-41
0	NRDC	13.7627	0.560574	4.27386e-43	1.70786e-41
0	RDX	13.7623	0.686602	4.29671e-43	1.71301e-41
0	FANCI	13.7376	0.774754	6.048e-43	2.40011e-41
0	TGIF1	13.7323	0.715666	6.50552e-43	2.57574e-41
0	LIN9	13.6944	1.07689	1.09657e-42	4.32177e-41
0	PSMB6	13.6662	0.675188	1.61578e-42	6.35355e-41
0	CLIC1	13.6599	0.728385	1.76155e-42	6.91098e-41
0	ADD2	13.6556	0.771347	1.87066e-42	7.32237e-41
0	KPNA4	13.6439	0.586587	2.19422e-42	8.56939e-41
0	BRD7	13.6173	0.581075	3.16206e-42	1.23213e-40
0	SNX3	13.6012	0.670264	3.93959e-42	1.53164e-40
0	BTBD3	13.6008	0.687093	3.96285e-42	1.53721e-40
0	UBL5	13.5964	0.715589	4.20783e-42	1.62857e-40
0	TBC1D31	13.5848	1.27117	4.93202e-42	1.90458e-40
0	DR1	13.5815	0.748593	5.1572e-42	1.98264e-40
0	VIM	13.5607	0.59285	6.84474e-42	2.61971e-40
0	NFYC	13.5512	0.684982	7.79521e-42	2.97687e-40
0	YAP1	13.5251	0.62501	1.11182e-41	4.23649e-40
0	CCT3	13.5242	0.678049	1.12619e-41	4.28178e-40
0	UBE2D2	13.5193	0.631034	1.20334e-41	4.56501e-40
0	SNRPD2	13.4871	0.608433	1.86407e-41	7.05601e-40
0	PSMA7	13.4171	0.608483	4.79888e-41	1.80856e-39
0	NDUFS5	13.399	0.606784	6.12933e-41	2.30492e-39
0	SMARCB1	13.3605	0.546262	1.02887e-40	3.86061e-39
0	SF1	13.3482	0.607334	1.2127e-40	4.54052e-39
0	MAP7D3	13.3419	1.01484	1.32038e-40	4.93294e-39
0	MSX2	13.3087	1.33943	2.0606e-40	7.68174e-39
0	PSMC1	13.2784	0.668364	3.08957e-40	1.14928e-38
0	PPIH	13.2772	0.849595	3.1399e-40	1.16548e-38
0	PLK4	13.2735	1.35066	3.30003e-40	1.22229e-38
0	CENPO	13.2621	1.07661	3.83816e-40	1.41856e-38
0	DNAJC8	13.2608	0.547411	3.90585e-40	1.44048e-38
0	ZNRF3	13.2338	0.711952	5.59836e-40	2.06027e-38
0	NR2F2	13.2267	0.732946	6.1538e-40	2.25985e-38
0	WBP11	13.225	0.696152	6.29175e-40	2.30559e-38
0	ZNF22	13.2212	0.642126	6.61868e-40	2.42024e-38
0	WRAP53	13.2176	0.894025	6.94435e-40	2.53041e-38
0	SNRPF	13.2175	0.868912	6.94932e-40	2.53041e-38
0	LCORL	13.2028	0.652799	8.4528e-40	3.07136e-38
0	FXR1	13.1796	0.554414	1.14951e-39	4.16801e-38
0	HINT2	13.1695	0.89818	1.31495e-39	4.75786e-38
0	PPP1R35	13.1685	0.894088	1.33212e-39	4.80986e-38
0	GDI2	13.165	0.545148	1.39522e-39	5.02716e-38
0	TTF2	13.1595	1.10014	1.50083e-39	5.39642e-38
0	ZIC2	13.1532	0.642746	1.63132e-39	5.84122e-38
0	RALY	13.1437	0.661201	1.84996e-39	6.61033e-38
0	YWHAE	13.1164	0.46637	2.6526e-39	9.43919e-38
0	PSMB2	13.1088	0.57707	2.93283e-39	1.04149e-37
0	GSPT1	13.1028	0.707452	3.17451e-39	1.12499e-37
0	HIST1H2BH	13.1013	0.86231	3.2347e-39	1.14397e-37
0	PPP2R5D	13.0973	0.81375	3.4124e-39	1.20434e-37
0	MAD2L2	13.0946	0.655926	3.53577e-39	1.24533e-37
0	CFL1	13.0751	0.479307	4.56842e-39	1.60575e-37
0	PTBP1	13.064	0.649265	5.28837e-39	1.85125e-37
0	PAK4	13.063	0.992131	5.35942e-39	1.87232e-37
0	SLIRP	13.0552	0.629172	5.93606e-39	2.06957e-37
0	RTRAF	13.0354	0.590359	7.70043e-39	2.67928e-37
0	USP13	13.0228	0.856193	9.08335e-39	3.14349e-37
0	POMP	13.0227	0.742087	9.08934e-39	3.14349e-37
0	FTH1	13.0067	0.564438	1.1214e-38	3.8705e-37
0	MORF4L1	13.0018	0.639161	1.19556e-38	4.11824e-37
0	REEP4	12.9857	1.86356	1.47517e-38	5.07122e-37
0	R3HDM1	12.9745	0.66208	1.70777e-38	5.85915e-37
0	ATP5F1C	12.9586	0.731512	2.10077e-38	7.19314e-37
0	TMA7	12.9574	0.707295	2.13306e-38	7.27478e-37
0	ATP5PB	12.9436	0.600982	2.55446e-38	8.69476e-37
0	EIF4E	12.9393	0.623569	2.70106e-38	9.17563e-37
0	ENAH	12.9329	0.433148	2.93398e-38	9.94722e-37
0	TNPO1	12.9097	0.571401	3.96899e-38	1.34035e-36
0	LSM2	12.8988	0.579943	4.5741e-38	1.53867e-36
0	ECI1	12.892	0.617624	4.99563e-38	1.67719e-36
0	EEF1B2	12.8875	0.64631	5.29331e-38	1.77367e-36
0	BZW1	12.8841	0.720781	5.53017e-38	1.84944e-36
0	CYC1	12.8745	0.579295	6.26441e-38	2.08688e-36
0	WDR62	12.8359	1.31774	1.03212e-37	3.41193e-36
0	TRIP13	12.8098	1.33203	1.44523e-37	4.76842e-36
0	EMP3	12.7972	0.803778	1.70072e-37	5.60068e-36
0	MED30	12.7791	0.919785	2.14653e-37	7.05529e-36
0	RUVBL1	12.767	0.616155	2.50613e-37	8.22154e-36
0	IARS2	12.7641	0.60927	2.60284e-37	8.52256e-36
0	ATL2	12.7313	0.699372	3.96358e-37	1.29535e-35
0	ATP5MF	12.729	0.662218	4.08292e-37	1.33182e-35
0	WDPCP	12.7273	1.05721	4.16878e-37	1.35726e-35
0	TPRKB	12.6906	0.771412	6.66345e-37	2.15723e-35
0	SMARCE1	12.6833	0.505487	7.31658e-37	2.36423e-35
0	PPP1R14B	12.6829	0.730275	7.35526e-37	2.37228e-35
0	PYURF	12.6691	0.617749	8.77263e-37	2.82413e-35
0	CCAR1	12.6526	0.867669	1.08174e-36	3.47591e-35
0	ST13	12.6302	0.668898	1.43985e-36	4.61799e-35
0	RDM1	12.6237	2.19048	1.56282e-36	5.00306e-35
0	PARP1	12.6117	0.56129	1.82015e-36	5.81605e-35
0	NOL7	12.6023	0.71447	2.0503e-36	6.52724e-35
0	HNRNPUL1	12.5844	0.527584	2.57331e-36	8.1621e-35
0	SEPTIN10	12.5549	0.696729	3.73592e-36	1.18279e-34
0	TIMELESS	12.5402	0.718706	4.50085e-36	1.42235e-34
0	TLN1	12.5266	0.766266	5.33975e-36	1.68437e-34
0	NDUFA12	12.5252	0.751666	5.43323e-36	1.71072e-34
0	PRDX3	12.5218	0.709355	5.67665e-36	1.7841e-34
0	PRTG	12.5045	0.615865	7.05042e-36	2.21183e-34
0	PCBP1	12.4895	0.547715	8.52151e-36	2.66847e-34
0	AKR1A1	12.4679	0.577654	1.11698e-35	3.49144e-34
0	PSMA3	12.4676	0.678216	1.12103e-35	3.49774e-34
0	COX17	12.4637	0.932929	1.17726e-35	3.66654e-34
0	PRDX4	12.4629	0.616427	1.18932e-35	3.69741e-34
0	NCL	12.4456	0.552172	1.47823e-35	4.57082e-34
0	CCT2	12.4288	0.577147	1.82349e-35	5.6283e-34
0	PHF6	12.4281	0.501925	1.83927e-35	5.66687e-34
0	JADE1	12.4267	0.775031	1.87146e-35	5.75576e-34
0	VBP1	12.4186	0.600887	2.07229e-35	6.36205e-34
0	PTN	12.4063	0.651866	2.41588e-35	7.40368e-34
0	NUP98	12.4012	0.621062	2.57361e-35	7.85908e-34
0	GOT1	12.3939	0.9863	2.81894e-35	8.59302e-34
0	DAZAP1	12.3665	0.698955	3.96574e-35	1.20675e-33
0	NUDT15	12.3537	0.952975	4.65426e-35	1.41376e-33
0	TALDO1	12.3511	0.61575	4.8039e-35	1.45665e-33
0	PRMT1	12.3417	0.502999	5.39912e-35	1.63139e-33
0	XPO1	12.3084	0.510538	8.16062e-35	2.46148e-33
0	SRI	12.3004	0.544032	9.01411e-35	2.71416e-33
0	CEP97	12.2997	0.815445	9.08687e-35	2.73129e-33
0	AC091057.6	12.2769	1.58098	1.20465e-34	3.61459e-33
0	PCBP2	12.2759	0.599398	1.22081e-34	3.6567e-33
0	CDKN2C	12.2601	2.93407	1.48305e-34	4.43448e-33
0	AURKAIP1	12.2402	0.594635	1.89463e-34	5.64554e-33
0	WDR54	12.2213	0.605075	2.39255e-34	7.11691e-33
0	GJA1	12.2028	0.593688	3.0015e-34	8.9129e-33
0	SRP9	12.2027	0.507964	3.00746e-34	8.91523e-33
0	NASP	12.198	0.966044	3.18691e-34	9.43096e-33
0	NDUFB10	12.1965	0.525016	3.24657e-34	9.59102e-33
0	PTGES3	12.1951	1.13901	3.30036e-34	9.73325e-33
0	CBX5	12.1884	0.512519	3.58207e-34	1.0546e-32
0	TAX1BP1	12.1825	0.555669	3.85395e-34	1.13271e-32
0	POU2F1	12.1781	0.589315	4.06878e-34	1.19381e-32
0	TICRR	12.1742	1.09655	4.26662e-34	1.24973e-32
0	FOPNL	12.17	0.792412	4.49089e-34	1.31318e-32
0	RFC3	12.1582	0.762765	5.18931e-34	1.51484e-32
0	NR2F1	12.1437	0.705772	6.19753e-34	1.80304e-32
0	SVBP	12.1401	0.552579	6.47352e-34	1.88016e-32
0	SSR2	12.124	0.467898	7.88341e-34	2.28579e-32
0	COX20	12.1121	0.886362	9.11823e-34	2.63938e-32
0	CBL	12.0989	0.636814	1.06991e-33	3.09178e-32
0	ARF1	12.0878	0.466055	1.22508e-33	3.53427e-32
0	PSMB1	12.0835	0.472455	1.29133e-33	3.71916e-32
0	ISCA2	12.0812	0.981311	1.32786e-33	3.818e-32
0	CNOT1	12.079	0.685717	1.36301e-33	3.91251e-32
0	DNALI1	12.0758	0.681056	1.41792e-33	4.06337e-32
0	THOC7	12.0661	0.591077	1.59532e-33	4.55659e-32
0	TXNL1	12.0642	0.518082	1.63263e-33	4.64773e-32
0	SNUPN	12.0554	0.857891	1.81664e-33	5.16302e-32
0	PIM1	12.055	0.839894	1.82554e-33	5.17978e-32
0	YWHAH	12.0273	0.720841	2.55363e-33	7.22187e-32
0	TAF15	12.0114	0.570742	3.09487e-33	8.73819e-32
0	SMTN	12.0099	2.17511	3.15311e-33	8.88806e-32
0	LSM14A	12.0024	0.608351	3.45041e-33	9.7102e-32
0	SNX6	11.9976	0.526676	3.656e-33	1.0272e-31
0	FANCD2	11.9953	1.12752	3.75917e-33	1.05447e-31
0	PSMB7	11.9916	0.78182	3.93465e-33	1.10189e-31
0	CCDC85C	11.9874	0.636941	4.13608e-33	1.15642e-31
0	ATP5MC3	11.9436	0.516745	7.00815e-33	1.95626e-31
0	FAM102B	11.9387	1.04257	7.44088e-33	2.07369e-31
0	ST3GAL3	11.9326	0.673488	8.00665e-33	2.22417e-31
0	SYNCRIP	11.9153	0.931789	9.84891e-33	2.73153e-31
0	APCDD1	11.912	1.21816	1.02446e-32	2.83669e-31
0	SAP18	11.9071	0.473947	1.08711e-32	3.00535e-31
0	ASRGL1	11.9052	0.721241	1.11194e-32	3.06907e-31
0	CFDP1	11.9038	0.510695	1.13045e-32	3.11516e-31
0	CALM1	11.8955	0.720198	1.24841e-32	3.43473e-31
0	YWHAZ	11.893	0.426188	1.28776e-32	3.53732e-31
0	SMIM14	11.8871	0.745141	1.38098e-32	3.78735e-31
0	XRCC5	11.8789	0.558904	1.52297e-32	4.17014e-31
0	HAUS4	11.8743	0.817875	1.6101e-32	4.4017e-31
0	LSM7	11.8664	0.535257	1.76933e-32	4.82934e-31
0	CGGBP1	11.8378	0.518208	2.49023e-32	6.78628e-31
0	SLIT2	11.8371	0.674649	2.5099e-32	6.82906e-31
0	TMEM258	11.8347	0.575076	2.58245e-32	7.01538e-31
0	SINHCAF	11.8305	0.758071	2.71363e-32	7.36014e-31
0	ATP5MD	11.819	0.607145	3.11431e-32	8.42037e-31
0	LSM6	11.8011	0.609041	3.85211e-32	1.03989e-30
0	RAB8A	11.7989	0.651199	3.95634e-32	1.06635e-30
0	PFDN1	11.7966	0.654279	4.06605e-32	1.09421e-30
0	PKM	11.7782	0.530536	5.05775e-32	1.35685e-30
0	POLR2L	11.7764	0.526535	5.16565e-32	1.38364e-30
0	RCOR1	11.7551	0.635796	6.65121e-32	1.77603e-30
0	TPM4	11.7538	0.541361	6.74885e-32	1.79931e-30
0	GAS1	11.7534	0.641811	6.78319e-32	1.80567e-30
0	EEF1AKMT2	11.7284	0.573372	9.11319e-32	2.42217e-30
0	STAG1	11.7263	0.575179	9.34177e-32	2.4791e-30
0	PTRHD1	11.7137	0.72971	1.08429e-31	2.87304e-30
0	KDELR1	11.7008	0.529934	1.26233e-31	3.33965e-30
0	CTNNA1	11.6983	0.5027	1.30034e-31	3.43493e-30
0	PDIA6	11.6918	0.520702	1.40362e-31	3.70207e-30
0	CYCS	11.6862	0.630305	1.50007e-31	3.9504e-30
0	SNW1	11.6856	0.660034	1.5104e-31	3.97155e-30
0	HNRNPD	11.6696	0.451851	1.8221e-31	4.77657e-30
0	COX7A2	11.665	0.682489	1.9251e-31	5.03891e-30
0	SELENOK	11.657	0.554378	2.11443e-31	5.52608e-30
0	TMED5	11.6509	0.828855	2.26971e-31	5.92291e-30
0	BARD1	11.6388	0.778463	2.6163e-31	6.79645e-30
0	LARP7	11.6355	0.586403	2.71961e-31	7.0542e-30
0	HSPD1	11.6137	0.52176	3.50914e-31	9.08841e-30
0	MFAP2	11.609	0.558589	3.71144e-31	9.59792e-30
0	TPBG	11.6068	0.770393	3.8059e-31	9.82745e-30
0	TMEM19	11.6042	1.07565	3.92483e-31	1.01194e-29
0	MRFAP1	11.6001	0.715413	4.11703e-31	1.0599e-29
0	EIF3G	11.5873	0.67975	4.77966e-31	1.225e-29
0	GNB1	11.5816	0.446484	5.11037e-31	1.30587e-29
0	RAC3	11.5787	0.675294	5.28447e-31	1.34637e-29
0	UBA52	11.5745	0.502872	5.54974e-31	1.41186e-29
0	TFAM	11.5668	0.621551	6.07247e-31	1.54257e-29
0	ATP5ME	11.551	0.660892	7.29416e-31	1.85018e-29
0	MT2A	11.549	1.67651	7.46741e-31	1.89134e-29
0	COX7B	11.5383	0.657106	8.45726e-31	2.1389e-29
0	CDCA4	11.5328	0.95335	9.0155e-31	2.27674e-29
0	FKBP3	11.532	0.541098	9.10542e-31	2.29608e-29
0	HNRNPUL2	11.5318	0.555115	9.12491e-31	2.29764e-29
0	WASF2	11.5263	0.529003	9.7204e-31	2.44401e-29
0	METAP2	11.5224	0.521805	1.01772e-30	2.55512e-29
0	GAR1	11.5208	0.670361	1.03613e-30	2.59757e-29
0	XRCC4	11.5063	1.14266	1.22664e-30	3.06625e-29
0	PAK2	11.4891	0.523361	1.49694e-30	3.7365e-29
0	CD99	11.4731	0.566038	1.8009e-30	4.48871e-29
0	FOXN4	11.4414	2.03575	2.59611e-30	6.46138e-29
0	JTB	11.4333	0.552011	2.85214e-30	7.08836e-29
0	UBTF	11.4308	0.562788	2.93517e-30	7.28421e-29
0	SFRP2	11.4264	0.564938	3.08517e-30	7.64545e-29
0	ITGA6	11.4245	0.728886	3.15375e-30	7.80417e-29
0	HDGFL2	11.4116	0.497825	3.66072e-30	9.04571e-29
0	CNOT7	11.4064	0.92632	3.88273e-30	9.58056e-29
0	SDCBP	11.3823	0.497968	5.12409e-30	1.25715e-28
0	KTN1	11.377	0.510806	5.44313e-30	1.33353e-28
0	VANGL1	11.369	1.51739	5.96352e-30	1.45894e-28
0	PPM1E	11.3675	0.70332	6.07327e-30	1.48369e-28
0	ZNF326	11.3522	0.525781	7.22866e-30	1.76344e-28
0	HEBP2	11.3499	0.62094	7.4208e-30	1.80776e-28
0	CCDC150	11.3467	1.28197	7.70119e-30	1.87341e-28
0	UQCRQ	11.3249	0.583662	9.8794e-30	2.39652e-28
0	ALDH7A1	11.299	0.542364	1.32791e-29	3.21217e-28
0	NOTCH2	11.2726	0.555278	1.79102e-29	4.32028e-28
0	SHROOM3	11.2681	0.571435	1.88692e-29	4.54523e-28
0	DZIP3	11.2674	0.669636	1.90081e-29	4.57229e-28
0	RHOBTB3	11.255	0.608883	2.18933e-29	5.25898e-28
0	TIMM8B	11.2539	0.534752	2.21588e-29	5.31533e-28
0	MEX3A	11.2519	0.482555	2.26609e-29	5.42821e-28
0	NDUFB3	11.2374	0.614048	2.66987e-29	6.38656e-28
0	CSE1L	11.2304	0.644178	2.89305e-29	6.91081e-28
0	CSDE1	11.2212	0.432489	3.20744e-29	7.65122e-28
0	CEP78	11.2088	0.558041	3.69321e-29	8.7978e-28
0	EZH2	11.2054	0.547168	3.83439e-29	9.10893e-28
0	KPNB1	11.1914	0.512908	4.49116e-29	1.06544e-27
0	BSG	11.1836	0.452204	4.9038e-29	1.16174e-27
0	PSMD14	11.174	0.631097	5.46757e-29	1.29352e-27
0	NDUFS6	11.1735	0.562946	5.49587e-29	1.29843e-27
0	ARID2	11.1682	0.489479	5.8342e-29	1.37647e-27
0	CENPM	11.1533	0.55991	6.89828e-29	1.6253e-27
0	SON	11.1497	0.520961	7.18574e-29	1.69071e-27
0	C11orf58	11.1276	0.427287	9.20364e-29	2.15959e-27
0	UBE2D3	11.1245	0.445845	9.52952e-29	2.23302e-27
0	ATP5MG	11.1115	0.49283	1.10328e-28	2.57825e-27
0	NEDD8	11.1102	0.55843	1.11857e-28	2.61045e-27
0	IKBIP	11.1085	1.02347	1.14104e-28	2.65929e-27
0	SORT1	11.1082	0.666588	1.14395e-28	2.66246e-27
0	UQCRH	11.1057	0.540613	1.17734e-28	2.73647e-27
0	HDAC2	11.104	0.462618	1.19958e-28	2.78441e-27
0	VPS28	11.1001	0.491264	1.2534e-28	2.90153e-27
0	NDUFC2	11.0996	0.506863	1.25985e-28	2.91253e-27
0	PSMD11	11.0943	0.569642	1.3373e-28	3.08744e-27
0	UQCRB	11.0911	0.519355	1.3862e-28	3.19606e-27
0	VDAC2	11.0905	0.481892	1.39524e-28	3.21261e-27
0	AAMDC	11.0888	0.753504	1.42259e-28	3.27119e-27
0	COX6B1	11.0843	0.567088	1.49553e-28	3.42976e-27
0	CCDC77	11.0814	1.08555	1.54518e-28	3.53893e-27
0	HAX1	11.0791	0.692801	1.58436e-28	3.62382e-27
0	HSPH1	11.0689	0.568135	1.77616e-28	4.05713e-27
0	PKN3	11.062	1.05111	1.91781e-28	4.37489e-27
0	GNG12	11.0525	0.914881	2.13208e-28	4.85726e-27
0	ZNF511	11.0483	0.752564	2.23368e-28	5.082e-27
0	JAM2	11.0377	0.69357	2.51475e-28	5.71392e-27
0	SPTBN1	11.0262	0.567231	2.85836e-28	6.48611e-27
0	ZNF714	11.0255	0.676373	2.87801e-28	6.5221e-27
0	DNAJB6	11.0245	0.690998	2.91276e-28	6.59218e-27
0	HMGXB4	11.0214	0.60289	3.0143e-28	6.8041e-27
0	CNTROB	11.0154	0.842396	3.22218e-28	7.26381e-27
0	COPS9	11.013	0.680271	3.30695e-28	7.44517e-27
0	UBXN1	11.0033	0.497678	3.68274e-28	8.28039e-27
0	SRSF10	10.989	0.826656	4.31551e-28	9.69049e-27
0	IFT57	10.9876	0.493804	4.38631e-28	9.83664e-27
0	CASZ1	10.9851	0.673233	4.50644e-28	1.00929e-26
0	CEP192	10.9846	0.568682	4.53216e-28	1.01373e-26
0	ATP5MPL	10.9602	0.718602	5.93369e-28	1.3255e-26
0	PAFAH1B3	10.9548	0.496558	6.30216e-28	1.40599e-26
0	IK	10.9193	0.488327	9.3215e-28	2.0769e-26
0	PRPSAP1	10.9065	0.547026	1.07253e-27	2.3835e-26
0	HIST1H3G	10.9059	2.05259	1.08013e-27	2.39731e-26
0	NUP50	10.8888	0.661506	1.30407e-27	2.88689e-26
0	COX4I1	10.8748	0.525189	1.51913e-27	3.35867e-26
0	RSL24D1	10.8729	0.61672	1.55267e-27	3.42841e-26
0	MPST	10.8704	0.551113	1.59438e-27	3.51602e-26
0	PDS5A	10.8489	0.543686	2.01892e-27	4.44085e-26
0	KBTBD2	10.8461	0.638997	2.08097e-27	4.5715e-26
0	AP2S1	10.8364	0.539633	2.31364e-27	5.07616e-26
0	TMEM18	10.8222	0.682213	2.70072e-27	5.91787e-26
0	GMNN	10.8165	0.587162	2.8764e-27	6.29482e-26
0	CANT1	10.8155	0.661864	2.90789e-27	6.35567e-26
0	C1orf43	10.7941	0.484087	3.67167e-27	8.01485e-26
0	BTF3	10.7928	0.837671	3.72401e-27	8.11392e-26
0	MAPRE1	10.7927	0.513321	3.72648e-27	8.11392e-26
0	OSTC	10.7899	0.507624	3.84129e-27	8.35334e-26
0	ARL2	10.7897	0.507011	3.84877e-27	8.35906e-26
0	POLQ	10.7719	1.18209	4.6716e-27	1.01265e-25
0	RHOA	10.7628	0.4664	5.1596e-27	1.11638e-25
0	NFIA	10.7445	0.730798	6.29299e-27	1.3582e-25
0	KANTR	10.7415	1.21983	6.50005e-27	1.40113e-25
0	EIF3J	10.7255	0.482915	7.72949e-27	1.66199e-25
0	RSBN1	10.6933	0.530274	1.09403e-26	2.34359e-25
0	CNIH1	10.6585	0.527298	1.59228e-26	3.40246e-25
0	GORASP2	10.6562	0.492723	1.63068e-26	3.48021e-25
0	PGLS	10.6507	0.514799	1.73e-26	3.68761e-25
0	SMIM26	10.6252	0.526189	2.27524e-26	4.83783e-25
0	PPDPF	10.6115	0.394963	2.63477e-26	5.59539e-25
0	ZNF724	10.6029	0.734157	2.88941e-26	6.1286e-25
0	HIST1H2AG	10.6001	1.03188	2.97819e-26	6.30915e-25
0	BEX3	10.5946	0.393658	3.15739e-26	6.68055e-25
0	GRK6	10.5852	0.91313	3.49162e-26	7.37868e-25
0	PSAT1	10.5846	0.49867	3.5124e-26	7.41348e-25
0	CAP1	10.5695	0.736728	4.12851e-26	8.69258e-25
0	ACTR3	10.5613	0.60746	4.50159e-26	9.46653e-25
0	SRSF11	10.549	0.460322	5.13189e-26	1.07657e-24
0	CCNG1	10.5453	0.485316	5.33746e-26	1.11833e-24
0	HNRNPA0	10.5452	0.411673	5.34476e-26	1.1185e-24
0	EIF1AX	10.517	0.712419	7.21198e-26	1.49834e-24
0	PFDN2	10.5097	0.456821	7.79626e-26	1.61777e-24
0	CTXN1	10.5095	0.431408	7.81393e-26	1.61949e-24
0	PRRC2C	10.5077	0.409472	7.96203e-26	1.6482e-24
0	HMGA1	10.5074	0.765609	7.98713e-26	1.65141e-24
0	LAPTM4A	10.4969	0.490708	8.92598e-26	1.8411e-24
0	TEAD1	10.4936	0.545081	9.24736e-26	1.90283e-24
0	BRCA2	10.4866	0.889526	9.95926e-26	2.04688e-24
0	NDUFA11	10.4816	0.498233	1.04956e-25	2.15197e-24
0	LRR1	10.4794	1.0605	1.07414e-25	2.19975e-24
0	SIVA1	10.4733	0.495403	1.14591e-25	2.34393e-24
0	CD81	10.4654	0.463002	1.24613e-25	2.54291e-24
0	SRP72	10.4621	0.495931	1.289e-25	2.62727e-24
0	COX5B	10.4554	0.625201	1.38374e-25	2.81704e-24
0	UQCC3	10.4544	0.622961	1.39936e-25	2.84549e-24
0	NSUN7	10.4539	0.940672	1.40604e-25	2.8557e-24
0	NOSIP	10.4445	0.611232	1.55336e-25	3.14746e-24
0	TDP1	10.4312	0.680115	1.78671e-25	3.61605e-24
0	PSPC1	10.4125	0.463522	2.17399e-25	4.38439e-24
0	GGH	10.4084	0.601966	2.26994e-25	4.57254e-24
0	NDUFB7	10.3675	0.458501	3.48485e-25	6.98714e-24
0	NDUFAF3	10.3641	0.503283	3.60989e-25	7.22943e-24
0	COA3	10.3589	0.503945	3.81458e-25	7.63049e-24
0	NDUFA6	10.3524	0.523648	4.08035e-25	8.14321e-24
0	HSBP1	10.3493	0.450544	4.21705e-25	8.40628e-24
0	GLO1	10.3387	0.474575	4.71063e-25	9.37933e-24
0	PHPT1	10.3371	0.433177	4.78988e-25	9.52611e-24
0	STRBP	10.3344	0.429719	4.9274e-25	9.78831e-24
0	SARNP	10.3233	0.544221	5.52921e-25	1.09711e-23
0	PFDN4	10.3172	0.84723	5.88952e-25	1.16726e-23
0	SOGA1	10.3084	0.550984	6.45624e-25	1.27811e-23
0	SMARCD1	10.2997	0.460932	7.06647e-25	1.39731e-23
0	CCDC12	10.2828	0.507261	8.42808e-25	1.66464e-23
0	PRPF38A	10.2793	0.492185	8.73195e-25	1.72269e-23
0	CCSAP	10.2596	0.88184	1.07163e-24	2.10934e-23
0	COIL	10.2556	0.655911	1.11681e-24	2.19575e-23
0	PPP2CA	10.2545	0.477964	1.12908e-24	2.21734e-23
0	GINS1	10.248	0.637678	1.20765e-24	2.36895e-23
0	CDV3	10.2461	0.478935	1.23234e-24	2.41464e-23
0	CACHD1	10.2434	0.518054	1.26755e-24	2.4808e-23
0	COPRS	10.2424	0.556837	1.28075e-24	2.50193e-23
0	ZNF503	10.2358	0.635607	1.37039e-24	2.67295e-23
0	MSX1	10.233	1.00596	1.41117e-24	2.74939e-23
0	RRM1	10.2128	0.496308	1.73805e-24	3.371e-23
0	UBE2L3	10.2112	0.472809	1.76659e-24	3.4225e-23
0	EIF2S2	10.207	0.910961	1.84387e-24	3.56821e-23
0	SYF2	10.2065	0.468365	1.85443e-24	3.5846e-23
0	NELFE	10.1777	0.819338	2.4936e-24	4.79323e-23
0	SOX2	10.1716	0.534222	2.65401e-24	5.09021e-23
0	FBXL7	10.1701	0.642128	2.69718e-24	5.16724e-23
0	RAD51AP1	10.169	0.909252	2.72827e-24	5.221e-23
0	SSU72	10.1627	0.447618	2.90802e-24	5.55881e-23
0	PAIP2	10.1449	0.473277	3.49153e-24	6.66681e-23
0	CFL2	10.1447	0.602504	3.49899e-24	6.67365e-23
0	KDM3B	10.1382	0.468538	3.73739e-24	7.11261e-23
0	NUP62	10.124	0.535043	4.3234e-24	8.20968e-23
0	LMX1A	10.1228	0.662958	4.37712e-24	8.30255e-23
0	CASP6	10.1222	0.6672	4.40322e-24	8.34286e-23
0	UXT	10.1182	0.476044	4.58602e-24	8.66064e-23
0	GNB2	10.1154	0.429139	4.72102e-24	8.90582e-23
0	DPM3	10.1151	0.746195	4.73435e-24	8.92119e-23
0	DECR1	10.1114	0.523148	4.91915e-24	9.25929e-23
0	MIIP	10.1111	0.658421	4.93119e-24	9.27183e-23
0	MIF	10.1108	0.460373	4.94914e-24	9.29543e-23
0	CD9	10.1071	1.31951	5.13742e-24	9.63854e-23
0	ARPC5	10.0979	0.616453	5.64226e-24	1.05512e-22
0	RTF1	10.0881	0.442221	6.23676e-24	1.16377e-22
0	FHL1	10.0798	0.73495	6.78941e-24	1.26415e-22
0	SERF2	10.0735	0.515511	7.23685e-24	1.34601e-22
0	LSM8	10.0692	0.464879	7.56182e-24	1.40342e-22
0	PSMB5	10.0581	0.434253	8.45778e-24	1.56801e-22
0	POLR2K	10.0567	0.517562	8.58186e-24	1.58931e-22
0	RSRC1	10.0558	0.536433	8.65906e-24	1.60188e-22
0	SNRNP40	10.0465	0.456763	9.52027e-24	1.75931e-22
0	SCAND1	10.0297	0.523922	1.12814e-23	2.0803e-22
0	AKIRIN2	10.0257	0.475822	1.17521e-23	2.16478e-22
0	ATP5PF	10.0256	0.54152	1.17674e-23	2.16528e-22
0	PIN1	10.0241	0.500609	1.19447e-23	2.19556e-22
0	PEBP1	9.9867	0.438094	1.74295e-23	3.2003e-22
0	UPF3B	9.98565	0.570355	1.76139e-23	3.23071e-22
0	OXSR1	9.98349	0.506875	1.80016e-23	3.29482e-22
0	CAPRIN1	9.98296	0.439557	1.80986e-23	3.30905e-22
0	TMEM237	9.98166	0.633111	1.83375e-23	3.34916e-22
0	CDC7	9.95033	0.611575	2.51361e-23	4.58115e-22
0	CENPJ	9.94627	0.627727	2.61806e-23	4.76144e-22
0	THRAP3	9.94046	0.400689	2.77543e-23	5.04232e-22
0	AHCTF1	9.93992	0.726405	2.79047e-23	5.0643e-22
0	ROMO1	9.93124	0.442339	3.04445e-23	5.51942e-22
0	UBXN11	9.92493	0.642015	3.24339e-23	5.87391e-22
0	ZNF519	9.91317	0.526375	3.6487e-23	6.59408e-22
0	SPAG7	9.90843	0.470617	3.82612e-23	6.90024e-22
0	PIH1D1	9.90217	0.545337	4.07344e-23	7.33858e-22
0	TMEM50A	9.89583	0.433043	4.33996e-23	7.80242e-22
0	E2F5	9.88901	0.495708	4.64609e-23	8.33537e-22
0	ATP5PO	9.88858	0.903773	4.66603e-23	8.36244e-22
0	CDR2	9.88575	0.8844	4.79962e-23	8.59291e-22
0	MDFIC	9.88038	0.83427	5.06402e-23	9.05686e-22
0	VPS26A	9.87498	0.48946	5.3444e-23	9.54841e-22
0	NKD1	9.86392	0.752107	5.96745e-23	1.06395e-21
0	MAF1	9.85974	0.429911	6.2208e-23	1.10797e-21
0	CCDC59	9.8372	0.560288	7.78496e-23	1.38227e-21
0	ATP5PD	9.81383	0.440932	9.81746e-23	1.74136e-21
0	TJP1	9.8133	0.414378	9.86914e-23	1.74873e-21
0	COA6	9.80415	0.610699	1.0805e-22	1.91258e-21
0	TRMT112	9.80049	0.439077	1.12043e-22	1.98124e-21
0	HSD17B10	9.7823	0.518784	1.34122e-22	2.36679e-21
0	HES5	9.77491	0.616475	1.44284e-22	2.5435e-21
0	PSMC3	9.77478	0.450155	1.44467e-22	2.54413e-21
0	PSMD4	9.76898	0.466215	1.52992e-22	2.69151e-21
0	SMARCA1	9.76759	0.423488	1.55099e-22	2.723e-21
0	METTL26	9.72459	0.477601	2.36851e-22	4.15405e-21
0	TSC22D1	9.72234	0.436111	2.42157e-22	4.2428e-21
0	EFCAB11	9.71354	0.907735	2.64014e-22	4.62105e-21
0	SS18	9.70554	0.465675	2.85566e-22	4.99321e-21
0	H3F3B	9.69771	0.651293	3.08328e-22	5.38028e-21
0	EBNA1BP2	9.68413	0.529902	3.52182e-22	6.1331e-21
0	AP2M1	9.67908	0.438389	3.70046e-22	6.43768e-21
0	TIPRL	9.67889	0.457698	3.70713e-22	6.44277e-21
0	NAE1	9.67763	0.45354	3.75311e-22	6.51611e-21
0	C9orf40	9.67497	0.779705	3.85219e-22	6.67468e-21
0	OST4	9.67067	0.52908	4.01723e-22	6.95364e-21
0	EIF5	9.6663	0.379138	4.19246e-22	7.24968e-21
0	UBXN2A	9.66557	0.465828	4.22272e-22	7.29467e-21
0	RALGPS2	9.65206	0.436836	4.81789e-22	8.29785e-21
0	SLC25A5	9.65133	0.587389	4.85211e-22	8.34845e-21
0	ERBB4	9.64289	0.661556	5.26813e-22	9.03715e-21
0	NDUFB11	9.63594	0.444185	5.63723e-22	9.66071e-21
0	EIF4A3	9.63518	0.429721	5.67923e-22	9.723e-21
0	SAP30	9.63501	0.47362	5.68884e-22	9.72978e-21
0	DHRS7	9.6316	0.591794	5.88066e-22	1.00479e-20
0	NDUFV2	9.62976	0.388201	5.98673e-22	1.02089e-20
0	NDUFB2	9.62142	0.552889	6.49304e-22	1.10613e-20
0	ZFP36L2	9.61939	0.491938	6.62222e-22	1.12702e-20
0	KRT10	9.61884	0.543734	6.65786e-22	1.13197e-20
0	RBM17	9.61762	0.445894	6.73732e-22	1.14435e-20
0	RBX1	9.61574	0.430645	6.86122e-22	1.16424e-20
0	AHNAK	9.61443	1.08304	6.94906e-22	1.17799e-20
0	CALR	9.60738	0.45184	7.44188e-22	1.26029e-20
0	FOS	9.59795	0.576388	8.15543e-22	1.37977e-20
0	AK9	9.59433	0.840147	8.44656e-22	1.42763e-20
0	TRAPPC1	9.57807	0.451427	9.88786e-22	1.66796e-20
0	PSMC6	9.57585	0.489283	1.01022e-21	1.70244e-20
0	RNF169	9.57008	0.498503	1.06823e-21	1.79845e-20
0	CEP350	9.56887	0.405791	1.08079e-21	1.81782e-20
0	MARCKSL1	9.54442	0.286491	1.36867e-21	2.29528e-20
0	CALD1	9.53834	0.454837	1.45135e-21	2.42921e-20
0	COPS8	9.53746	0.467088	1.46372e-21	2.44754e-20
0	EI24	9.53437	0.45275	1.50795e-21	2.51417e-20
0	HASPIN	9.51034	1.62038	1.90048e-21	3.16251e-20
0	HIST1H1D	9.50667	0.816535	1.96859e-21	3.27269e-20
0	FAM133B	9.50512	0.58673	1.99821e-21	3.31872e-20
0	CCN1	9.49933	0.506414	2.11242e-21	3.50503e-20
0	TRIR	9.49812	0.403424	2.13722e-21	3.54276e-20
0	CWC15	9.48987	0.415133	2.31332e-21	3.831e-20
0	TMEM106C	9.4845	0.507851	2.43543e-21	4.02933e-20
0	SNAPC1	9.48032	0.780479	2.53509e-21	4.1902e-20
0	MAP2K2	9.47986	0.395807	2.54634e-21	4.20476e-20
0	PSMD2	9.47553	0.428924	2.65411e-21	4.37434e-20
0	ATP1B3	9.45868	0.51856	3.11847e-21	5.12984e-20
0	ZIC5	9.45681	0.550742	3.17478e-21	5.21748e-20
0	KLF6	9.44862	0.619457	3.43312e-21	5.63666e-20
0	PFN1	9.44373	0.41561	3.59734e-21	5.89505e-20
0	ACAA2	9.44219	0.506855	3.65062e-21	5.97667e-20
0	MCRS1	9.43757	0.469734	3.81518e-21	6.24016e-20
0	FMC1	9.42661	0.503383	4.23568e-21	6.92135e-20
0	METTL5	9.40313	0.497598	5.29645e-21	8.63833e-20
0	ANXA2	9.39664	0.695067	5.63334e-21	9.17909e-20
0	GPX8	9.39047	0.615052	5.97345e-21	9.70573e-20
0	ACTN1	9.38354	0.516629	6.37942e-21	1.03556e-19
0	GTF2H5	9.36488	0.499751	7.61364e-21	1.23242e-19
0	IFIT1	9.35767	1.60163	8.15158e-21	1.31826e-19
0	VDAC1	9.35683	0.476889	8.21678e-21	1.32756e-19
0	EXOSC6	9.35401	0.552931	8.43877e-21	1.36215e-19
0	PDIA3	9.34462	0.439191	9.22167e-21	1.48573e-19
0	PDCD5	9.34226	0.471216	9.42956e-21	1.51781e-19
0	ARX	9.33866	0.651881	9.75579e-21	1.56885e-19
0	CDON	9.33712	0.466112	9.89886e-21	1.59037e-19
0	SRSF9	9.32347	0.428856	1.12595e-20	1.80729e-19
0	TOMM5	9.32001	0.428273	1.16326e-20	1.86545e-19
0	ATOH8	9.31951	1.35523	1.16882e-20	1.87261e-19
0	TRAIP	9.31934	1.40252	1.17062e-20	1.87375e-19
0	NDUFS8	9.31348	0.442096	1.23706e-20	1.97643e-19
0	USP6NL	9.31332	0.474377	1.23898e-20	1.97648e-19
0	SUV39H2	9.30252	0.512626	1.37153e-20	2.18025e-19
0	ACP1	9.30247	0.45407	1.37223e-20	2.18025e-19
0	SMIM19	9.29569	0.555209	1.4626e-20	2.31955e-19
0	SORD	9.29394	0.916562	1.48676e-20	2.3557e-19
0	KIF2A	9.28903	0.424242	1.55697e-20	2.46241e-19
0	YEATS4	9.28192	0.575569	1.66452e-20	2.6301e-19
0	SUB1	9.28145	0.495989	1.67181e-20	2.63919e-19
0	SLC25A33	9.27854	0.582013	1.71813e-20	2.70982e-19
0	NDUFB1	9.27717	0.510979	1.74041e-20	2.73995e-19
0	DENR	9.27349	0.486022	1.8015e-20	2.83095e-19
0	NSA2	9.2639	0.425702	1.97097e-20	3.09444e-19
0	HSPA5	9.26008	0.443194	2.0428e-20	3.2043e-19
0	YY1	9.25381	0.414416	2.16627e-20	3.39487e-19
0	RAD23B	9.25341	0.41299	2.17438e-20	3.40449e-19
0	NBPF1	9.2399	0.867304	2.46718e-20	3.85242e-19
0	PPP2R1A	9.23526	0.588596	2.57664e-20	4.00158e-19
0	ERCC6L	9.23126	1.54777	2.67468e-20	4.15009e-19
0	FBLN1	9.22868	0.508817	2.73976e-20	4.24724e-19
0	NET1	9.22835	0.737809	2.74829e-20	4.25664e-19
0	RNF7	9.22358	0.386732	2.87333e-20	4.44232e-19
0	GLA	9.22166	0.835723	2.92541e-20	4.51877e-19
0	MLF2	9.2141	0.380257	3.13905e-20	4.83576e-19
0	PA2G4	9.20688	0.436618	3.35728e-20	5.16733e-19
0	FIGN	9.19944	0.537722	3.59822e-20	5.52829e-19
0	PCLAF	9.19296	0.475781	3.82159e-20	5.86625e-19
0	DMRTA2	9.1908	0.660653	3.89925e-20	5.98012e-19
0	PAPOLA	9.18616	0.410304	4.07113e-20	6.23817e-19
0	WLS	9.17636	0.676926	4.45904e-20	6.8265e-19
0	ATP5MC2	9.17393	0.372595	4.56086e-20	6.97617e-19
0	PPIG	9.16575	0.388952	4.92047e-20	7.51954e-19
0	CCNG2	9.16226	0.495903	5.0821e-20	7.75966e-19
0	RCC2	9.15112	0.470992	5.63455e-20	8.59555e-19
0	ARID4B	9.14248	0.374499	6.10341e-20	9.30257e-19
0	TIMM10	9.12507	0.471805	7.16904e-20	1.08978e-18
0	PPID	9.12282	0.461834	7.31974e-20	1.11171e-18
0	SEC61B	9.10956	0.477442	8.27132e-20	1.25402e-18
0	IGFBP4	9.10605	0.878615	8.54383e-20	1.2942e-18
0	C2orf69	9.10057	0.814159	8.98611e-20	1.35761e-18
0	BCL7C	9.09892	0.486544	9.12347e-20	1.37716e-18
0	CCT8	9.09729	0.419044	9.26098e-20	1.39669e-18
0	COPZ1	9.09652	0.417441	9.32738e-20	1.40547e-18
0	CENPK	9.09579	0.855884	9.39019e-20	1.4137e-18
0	DCAF15	9.08403	0.470023	1.04631e-19	1.57111e-18
0	FAM110A	9.08153	1.33989	1.07054e-19	1.6061e-18
0	GMPS	9.07667	0.418321	1.11948e-19	1.67658e-18
0	GSTM3	9.06123	0.528288	1.28992e-19	1.92683e-18
0	SRSF2	9.05898	0.427586	1.31675e-19	1.9652e-18
0	PPP1CA	9.05671	0.433599	1.34449e-19	2.00486e-18
0	TSR3	9.05464	0.45472	1.37023e-19	2.04147e-18
0	ATP5F1E	9.05182	0.422953	1.40606e-19	2.09305e-18
0	SNRPA1	9.04546	0.529358	1.4903e-19	2.21654e-18
0	AGTRAP	9.04026	0.472836	1.56293e-19	2.32255e-18
0	CCT6A	9.03955	0.391779	1.57322e-19	2.33582e-18
0	UBE2E1	9.03854	0.437562	1.58773e-19	2.35533e-18
0	DYNC1I2	9.02094	0.370072	1.86479e-19	2.75685e-18
0	UBE2Q2	9.01309	0.530139	2.00324e-19	2.95645e-18
0	SNF8	8.99619	0.447261	2.33691e-19	3.44594e-18
0	REST	8.99397	0.415523	2.38463e-19	3.5133e-18
0	CDK16	8.99286	0.410463	2.40879e-19	3.54587e-18
0	SBNO1	8.9811	0.413681	2.68081e-19	3.94292e-18
0	TMEM60	8.98082	0.755596	2.68763e-19	3.94958e-18
0	KDM1A	8.97213	0.359302	2.90833e-19	4.26165e-18
0	HIST1H3E	8.97207	1.90312	2.90989e-19	4.26165e-18
0	PLEKHO1	8.96564	0.402166	3.08497e-19	4.51422e-18
0	PCDH18	8.96388	0.814192	3.1344e-19	4.57877e-18
0	SPATA5	8.96149	0.515517	3.20317e-19	4.67131e-18
0	PAIP1	8.95141	0.503521	3.50963e-19	5.1139e-18
0	SRSF7	8.94967	0.424219	3.5655e-19	5.19092e-18
0	MYBL2	8.94619	0.431079	3.67959e-19	5.35249e-18
0	LATS2	8.94597	0.595724	3.687e-19	5.35875e-18
0	UBE2G1	8.94531	0.452092	3.70909e-19	5.38631e-18
0	HUNK	8.94472	0.72476	3.72879e-19	5.40581e-18
0	HTATSF1	8.93493	0.414321	4.07455e-19	5.9021e-18
0	ATAD5	8.93265	0.507655	4.15916e-19	6.01959e-18
0	NCAPD3	8.93136	0.5258	4.20802e-19	6.08519e-18
0	GNAI2	8.92956	0.436937	4.2772e-19	6.18005e-18
0	DNAJC2	8.92179	0.617925	4.58818e-19	6.61827e-18
0	MPHOSPH9	8.91612	0.481259	4.82926e-19	6.95438e-18
0	SF3B5	8.90835	0.393091	5.17976e-19	7.45289e-18
0	NOP58	8.90493	0.412859	5.34182e-19	7.67965e-18
0	CSNK1A1	8.89831	0.456258	5.6702e-19	8.14494e-18
0	EPS8	8.89597	0.854504	5.79109e-19	8.31166e-18
0	SF3B6	8.89405	0.414031	5.89191e-19	8.4423e-18
0	IGFBP2	8.88745	0.38509	6.25288e-19	8.94463e-18
0	DAP	8.88603	0.436241	6.33319e-19	9.05199e-18
0	ELOC	8.8852	0.514203	6.38044e-19	9.11197e-18
0	PAX6	8.88091	0.467833	6.63153e-19	9.4627e-18
0	OPN3	8.88076	0.874377	6.64023e-19	9.46727e-18
0	HSPB1	8.87915	0.414562	6.73753e-19	9.59806e-18
0	SAC3D1	8.87843	0.644312	6.78121e-19	9.65229e-18
0	AP2B1	8.87369	0.459088	7.07595e-19	1.00635e-17
0	RBMS1	8.87226	0.617873	7.16792e-19	1.01859e-17
0	FBN2	8.8628	0.65021	7.80296e-19	1.10609e-17
0	ZNF706	8.86213	0.434117	7.8499e-19	1.11183e-17
0	WNT8B	8.85037	0.726566	8.72269e-19	1.23342e-17
0	MED13	8.84311	0.432152	9.30913e-19	1.31311e-17
0	PPP4C	8.83364	0.386518	1.01321e-18	1.42802e-17
0	FAM89B	8.83346	0.448607	1.01487e-18	1.42921e-17
0	ARMC1	8.82827	0.558525	1.06303e-18	1.49579e-17
0	SASS6	8.81283	0.709045	1.2203e-18	1.7143e-17
0	FERMT2	8.81116	0.529668	1.23857e-18	1.73854e-17
0	CHCHD2	8.80597	0.469443	1.29727e-18	1.81797e-17
0	WAPL	8.80341	0.417676	1.32725e-18	1.85847e-17
0	NEMP1	8.80309	0.555463	1.33101e-18	1.86223e-17
0	VCP	8.8028	0.396429	1.33446e-18	1.86553e-17
0	ZNRD1	8.802	0.574465	1.34395e-18	1.87728e-17
0	PHB	8.80163	0.56293	1.34845e-18	1.88204e-17
0	PPP6R3	8.80084	0.393084	1.35793e-18	1.89221e-17
0	PHIP	8.78922	0.38795	1.506e-18	2.09514e-17
0	TK1	8.78069	0.687294	1.6248e-18	2.2586e-17
0	ATAD2	8.77882	0.50135	1.65194e-18	2.29262e-17
0	CUL3	8.76211	0.386949	1.91626e-18	2.65525e-17
0	TMOD3	8.75761	0.475997	1.99434e-18	2.75892e-17
0	VCL	8.75731	0.500405	1.9996e-18	2.76398e-17
0	IQGAP1	8.75685	0.693243	2.00778e-18	2.77305e-17
0	GEMIN2	8.75252	1.02109	2.08639e-18	2.87932e-17
0	ROR1	8.74258	0.633079	2.27845e-18	3.14185e-17
0	VKORC1	8.74084	0.41388	2.31388e-18	3.18816e-17
0	YES1	8.73869	0.420008	2.35837e-18	3.24685e-17
0	CEP131	8.72619	0.682067	2.63386e-18	3.62325e-17
0	DYNC1LI1	8.71905	0.417506	2.80555e-18	3.85635e-17
0	NCK2	8.71073	0.466019	3.01912e-18	4.14329e-17
0	CACNG4	8.69881	0.415527	3.35382e-18	4.59529e-17
0	LEF1	8.6987	0.558542	3.35721e-18	4.59628e-17
0	RNF182	8.68819	0.736619	3.68266e-18	5.03785e-17
0	CDKN2D	8.68151	0.944453	3.90536e-18	5.33825e-17
0	SP5	8.68142	1.2073	3.90858e-18	5.33842e-17
0	CMTM6	8.67188	0.471477	4.25039e-18	5.79608e-17
0	ADH5	8.66694	0.398626	4.43876e-18	6.04338e-17
0	IGF2BP3	8.66416	0.406832	4.54861e-18	6.18805e-17
0	TMEM14B	8.66398	0.525553	4.55555e-18	6.1926e-17
0	ROCK1	8.65927	0.394293	4.74799e-18	6.4491e-17
0	B3GNT5	8.65781	0.648844	4.80897e-18	6.52679e-17
0	TIMM17B	8.65743	0.415417	4.82503e-18	6.54343e-17
0	ASXL1	8.65177	0.374823	5.07067e-18	6.87113e-17
0	MFGE8	8.64642	0.518609	5.31399e-18	7.18389e-17
0	ZCCHC9	8.64626	0.508914	5.32143e-18	7.18831e-17
0	IER5	8.64571	0.531299	5.3473e-18	7.2176e-17
0	STOML2	8.64499	0.392228	5.38083e-18	7.25717e-17
0	ZNF362	8.64099	0.452608	5.57272e-18	7.50422e-17
0	DNTTIP1	8.64007	0.476974	5.61804e-18	7.55934e-17
0	SCARA3	8.63558	0.932102	5.84308e-18	7.84987e-17
0	USP22	8.63492	0.354641	5.87673e-18	7.88892e-17
0	TOMM6	8.63182	0.444356	6.03848e-18	8.09974e-17
0	CREBBP	8.6284	0.375049	6.22178e-18	8.33912e-17
0	ALYREF	8.62774	0.423385	6.25777e-18	8.38083e-17
0	SSR3	8.62712	0.415672	6.29157e-18	8.41956e-17
0	EIF3I	8.62426	0.416868	6.45067e-18	8.62577e-17
0	PIBF1	8.62249	0.55757	6.55135e-18	8.7536e-17
0	NUP107	8.62167	0.448574	6.59862e-18	8.80992e-17
0	ZFP36L1	8.62067	0.512645	6.65621e-18	8.87993e-17
0	AIDA	8.61935	0.514462	6.73376e-18	8.97644e-17
0	FAM204A	8.61468	0.422451	7.01358e-18	9.34221e-17
0	AMD1	8.61214	0.478367	7.17089e-18	9.54437e-17
0	CCDC173	8.60968	0.775931	7.32646e-18	9.74391e-17
0	HIST1H1C	8.60849	0.553959	7.40264e-18	9.83762e-17
0	ZFX	8.60594	0.555889	7.5697e-18	1.00519e-16
0	MED21	8.60421	0.552974	7.68434e-18	1.01963e-16
0	YPEL1	8.59282	0.503262	8.48568e-18	1.12509e-16
0	BMPR1A	8.58131	0.414762	9.37986e-18	1.24078e-16
0	ZC3H15	8.57434	0.376147	9.96604e-18	1.31731e-16
0	TAF5	8.57338	0.880089	1.00494e-17	1.32629e-16
0	LIX1L	8.57219	0.492165	1.01534e-17	1.33797e-16
0	FAM200B	8.56811	0.485494	1.05193e-17	1.38512e-16
0	PITHD1	8.56758	0.432112	1.05679e-17	1.39046e-16
0	SLC25A24	8.56446	0.522147	1.08585e-17	1.42761e-16
0	PET100	8.56417	0.441218	1.08859e-17	1.43011e-16
0	CEP44	8.55076	0.513438	1.22281e-17	1.60522e-16
0	DAD1	8.54974	0.439059	1.23372e-17	1.6183e-16
0	PSMD7	8.54598	0.389631	1.27453e-17	1.67056e-16
0	AP1S1	8.54407	0.484921	1.2958e-17	1.69715e-16
0	DPY30	8.53671	0.415201	1.38096e-17	1.80732e-16
0	DYNLT1	8.53557	0.397876	1.39465e-17	1.82385e-16
0	SURF2	8.5322	0.663339	1.43592e-17	1.87497e-16
0	RAD18	8.52732	0.661259	1.49777e-17	1.95425e-16
0	GET3	8.52701	0.446857	1.50178e-17	1.95799e-16
0	CEP41	8.52444	0.555598	1.53549e-17	2.00044e-16
0	SAMD5	8.5237	0.512436	1.54536e-17	2.01177e-16
0	MYL6	8.52136	0.384016	1.57689e-17	2.05127e-16
0	RBBP6	8.49845	0.384203	1.92136e-17	2.49372e-16
0	C12orf75	8.49623	0.486713	1.95843e-17	2.53992e-16
0	COPE	8.48562	0.387378	2.14567e-17	2.77856e-16
0	FGFR1OP	8.47537	0.539793	2.34337e-17	3.02775e-16
0	ZC3H7A	8.47141	0.47195	2.42434e-17	3.12767e-16
0	PPIL1	8.46878	0.455019	2.47978e-17	3.1968e-16
0	RALA	8.46704	0.416039	2.51701e-17	3.23995e-16
0	CCDC124	8.46621	0.395276	2.53504e-17	3.26072e-16
0	NUMA1	8.4535	0.380544	2.8271e-17	3.63096e-16
0	CRABP1	8.44494	0.498785	3.04205e-17	3.9012e-16
0	NECTIN2	8.44445	0.426418	3.05482e-17	3.91467e-16
0	MID1	8.44081	0.401743	3.15132e-17	4.03233e-16
0	RNF145	8.43098	0.397815	3.42789e-17	4.37647e-16
0	PSMD9	8.42318	0.451607	3.66405e-17	4.67106e-16
0	KATNBL1	8.41925	0.460616	3.78909e-17	4.82332e-16
0	UBE2V2	8.41903	0.56704	3.79618e-17	4.82877e-16
0	DDX10	8.41269	0.636688	4.00707e-17	5.08576e-16
0	SDHB	8.4106	0.450283	4.0792e-17	5.1735e-16
0	AAAS	8.41042	0.483066	4.08537e-17	5.1775e-16
0	RCBTB2	8.40713	0.534906	4.20151e-17	5.31687e-16
0	EIF3E	8.40325	0.408739	4.34289e-17	5.49174e-16
0	DYRK1A	8.40256	0.374057	4.36853e-17	5.52011e-16
0	LAMTOR4	8.39594	0.346872	4.62194e-17	5.83177e-16
0	BAG3	8.38547	0.802057	5.05253e-17	6.36866e-16
0	COMMD4	8.38541	0.487005	5.05485e-17	6.36866e-16
0	IFI6	8.37768	0.499094	5.39834e-17	6.79646e-16
0	SSBP1	8.37561	0.44606	5.4939e-17	6.91172e-16
0	LZIC	8.36641	0.37924	5.93983e-17	7.46727e-16
0	CRAT	8.36311	0.997607	6.10881e-17	7.67411e-16
0	TENT4A	8.34974	0.532428	6.84139e-17	8.57678e-16
0	ARL5A	8.34972	0.540324	6.8423e-17	8.57678e-16
0	RGS3	8.34636	0.53148	7.03998e-17	8.81815e-16
0	USP16	8.34601	0.441068	7.06101e-17	8.83807e-16
0	KPNA3	8.33639	0.387831	7.65947e-17	9.58018e-16
0	THAP12	8.32432	0.453708	8.48151e-17	1.06007e-15
0	HAGH	8.31781	0.472952	8.96064e-17	1.11833e-15
0	NEDD1	8.30796	0.546263	9.73614e-17	1.21423e-15
0	RNPS1	8.30704	0.382831	9.81205e-17	1.22281e-15
0	UBE2N	8.30587	0.448032	9.90868e-17	1.23396e-15
0	COPS6	8.30518	0.377347	9.9671e-17	1.24034e-15
0	DHX9	8.29539	0.376736	1.08225e-16	1.34388e-15
0	PDS5B	8.29238	0.38452	1.11006e-16	1.37741e-15
0	BCL2	8.29168	0.471159	1.11662e-16	1.38457e-15
0	BOD1	8.27613	0.378012	1.27238e-16	1.57478e-15
0	GEM	8.26097	1.43662	1.44489e-16	1.78493e-15
0	BRK1	8.2609	0.442975	1.44573e-16	1.78493e-15
0	RSL1D1	8.25417	0.424009	1.52962e-16	1.88445e-15
0	LIX1	8.25024	0.502974	1.58072e-16	1.94601e-15
0	IFT52	8.24806	0.468737	1.60989e-16	1.9791e-15
0	RSPO3	8.23875	0.545046	1.74014e-16	2.13617e-15
0	PTPN13	8.23787	0.427779	1.75296e-16	2.15038e-15
0	ERI2	8.23563	0.880095	1.78618e-16	2.18956e-15
0	ASAP3	8.22519	0.533332	1.94879e-16	2.3855e-15
0	PRPF40A	8.2191	0.343879	2.05035e-16	2.50625e-15
0	JAK1	8.2148	0.457355	2.12527e-16	2.59599e-15
0	ATP5F1D	8.19915	0.374361	2.4209e-16	2.94873e-15
0	PDLIM2	8.19673	0.699194	2.47023e-16	3.00669e-15
0	GLOD4	8.19439	0.590092	2.51866e-16	3.06348e-15
0	EIF6	8.18331	0.378619	2.76148e-16	3.35408e-15
0	EDF1	8.1797	0.382134	2.84551e-16	3.45371e-15
0	TNPO3	8.17861	0.384542	2.87145e-16	3.48275e-15
0	CDKN1B	8.17536	0.456869	2.94989e-16	3.57285e-15
0	OARD1	8.17432	0.406366	2.97548e-16	3.59787e-15
0	MOSPD3	8.17426	0.56331	2.97681e-16	3.59787e-15
0	CHRAC1	8.17229	0.624836	3.02585e-16	3.65458e-15
0	ATP8B3	8.16455	2.90579	3.22631e-16	3.88851e-15
0	APAF1	8.16364	0.494698	3.25081e-16	3.91529e-15
0	DSTYK	8.1628	0.503622	3.27361e-16	3.94e-15
0	FAM13B	8.15879	0.423718	3.384e-16	4.06717e-15
0	CAPZA1	8.15039	0.480124	3.6275e-16	4.35679e-15
0	GTF2A1	8.14272	0.489569	3.86478e-16	4.62887e-15
0	CETN3	8.14194	0.503473	3.88986e-16	4.65567e-15
0	TCF4	8.14103	0.394273	3.91927e-16	4.6876e-15
0	STAT1	8.14006	0.644602	3.95081e-16	4.72206e-15
0	PRMT5	8.13893	0.585095	3.98781e-16	4.76297e-15
0	LYRM2	8.12274	0.681712	4.55757e-16	5.43218e-15
0	NDUFB6	8.11079	0.447386	5.02914e-16	5.98596e-15
0	PSME2	8.10754	0.944542	5.16532e-16	6.1438e-15
0	UBE2M	8.10715	0.398667	5.18195e-16	6.15543e-15
0	RBBP4	8.10715	0.558461	5.18224e-16	6.15543e-15
0	PLCG2	8.1039	0.65756	5.3225e-16	6.31768e-15
0	BAMBI	8.09687	0.627774	5.63923e-16	6.68901e-15
0	NLGN1	8.09382	0.744298	5.78201e-16	6.84894e-15
0	CD63	8.08914	0.361102	6.00858e-16	7.10754e-15
0	PIK3R3	8.08633	0.379037	6.149e-16	7.26865e-15
0	CCDC138	8.0826	0.407845	6.33979e-16	7.48391e-15
0	NDUFA7	8.07885	0.364855	6.5379e-16	7.7072e-15
0	CCDC88A	8.07736	0.361624	6.61824e-16	7.79657e-15
0	ACTR2	8.07285	0.409902	6.86787e-16	8.07959e-15
0	PFDN5	8.07106	0.372049	6.96932e-16	8.19335e-15
0	SF3A1	8.06729	0.417796	7.18741e-16	8.44398e-15
0	DDX1	8.06644	0.339023	7.23765e-16	8.4972e-15
0	CDK2AP2	8.06566	0.758696	7.28419e-16	8.54021e-15
0	HNRNPC	8.06504	0.297706	7.32124e-16	8.57781e-15
0	MYL12B	8.06417	0.743163	7.37324e-16	8.63286e-15
0	ANXA5	8.05154	0.362399	8.176e-16	9.54679e-15
0	MCU	8.04867	0.601434	8.36987e-16	9.76655e-15
0	CDH2	8.0478	0.311519	8.42944e-16	9.8294e-15
0	PDIA4	8.04743	0.660229	8.45482e-16	9.85233e-15
0	BORCS7	8.0418	0.439326	8.85299e-16	1.03024e-14
0	HAUS6	8.03725	0.481395	9.18741e-16	1.06771e-14
0	TRIOBP	8.03406	0.387335	9.43009e-16	1.09517e-14
0	C18orf54	8.03327	0.728578	9.49076e-16	1.10074e-14
0	TCF3	8.0319	0.370969	9.59737e-16	1.1116e-14
0	NFIB	8.0236	0.713771	1.02693e-15	1.18863e-14
0	TMBIM4	8.0201	0.441674	1.05662e-15	1.22135e-14
0	NUP93	8.00999	0.411651	1.14715e-15	1.32422e-14
0	MOB1A	8.00493	0.503528	1.19531e-15	1.37889e-14
0	ADI1	7.99688	0.522446	1.27608e-15	1.47108e-14
0	ZDHHC20	7.98458	0.429629	1.41002e-15	1.62331e-14
0	NT5DC2	7.97487	0.388754	1.52544e-15	1.75503e-14
0	USP5	7.95394	0.424969	1.80671e-15	2.07446e-14
0	WNT7B	7.95213	0.634554	1.83332e-15	2.10362e-14
0	TOX3	7.94973	0.394276	1.86923e-15	2.1434e-14
0	MYL6B	7.94544	0.35345	1.93508e-15	2.21448e-14
0	NUP35	7.94437	0.626017	1.95188e-15	2.23222e-14
0	CHCHD3	7.94322	0.382897	1.96995e-15	2.25139e-14
0	KCMF1	7.92226	0.367641	2.33233e-15	2.65849e-14
0	CDKN2AIPNL	7.92162	0.503108	2.34432e-15	2.67038e-14
0	CDYL	7.9202	0.450222	2.37132e-15	2.69935e-14
0	IER5L	7.91672	0.40521	2.43857e-15	2.77407e-14
0	H2AFY2	7.90979	0.387966	2.57824e-15	2.92909e-14
0	AGBL5	7.90961	0.481057	2.58206e-15	2.93149e-14
0	TGIF2	7.90427	0.415253	2.69512e-15	3.05382e-14
0	TAF8	7.89429	0.538592	2.9198e-15	3.30406e-14
0	SSBP3	7.88969	0.331551	3.0294e-15	3.42583e-14
0	LYPD1	7.87388	0.640756	3.43802e-15	3.88027e-14
0	UGP2	7.86682	0.604969	3.63771e-15	4.0976e-14
0	BABAM1	7.85693	0.39496	3.93674e-15	4.43154e-14
0	SZRD1	7.8497	0.365197	4.17033e-15	4.69142e-14
0	COPG2	7.84836	0.398725	4.21519e-15	4.7357e-14
0	BRCA1	7.84819	0.603837	4.22074e-15	4.7372e-14
0	C17orf53	7.84816	1.11349	4.22203e-15	4.7372e-14
0	PHAX	7.84758	0.417038	4.24129e-15	4.75572e-14
0	LRRIQ1	7.8392	0.66228	4.53422e-15	5.08086e-14
0	ERP29	7.83872	0.516333	4.55174e-15	5.09718e-14
0	DALRD3	7.83761	0.473093	4.59194e-15	5.13552e-14
0	HIST1H1E	7.83708	0.377175	4.6114e-15	5.15394e-14
0	ARPC2	7.8368	0.445721	4.62174e-15	5.16214e-14
0	CEP295	7.83493	0.638209	4.69098e-15	5.23269e-14
0	CAPZA2	7.83238	0.365346	4.78729e-15	5.33667e-14
0	NIF3L1	7.82681	0.662295	5.00413e-15	5.57118e-14
0	ZRANB3	7.82535	0.530605	5.06228e-15	5.63228e-14
0	SUCO	7.82446	0.345036	5.09825e-15	5.66863e-14
0	GSTO1	7.8243	0.651756	5.1048e-15	5.67225e-14
0	UBE2R2	7.82229	0.346143	5.18723e-15	5.76014e-14
0	TCF7L1	7.81833	0.417412	5.35288e-15	5.93921e-14
0	TMEM203	7.81827	0.539964	5.35539e-15	5.93921e-14
0	PSMA1	7.81746	0.365853	5.38984e-15	5.97357e-14
0	GPS2	7.81485	0.443032	5.50276e-15	6.09088e-14
0	NRBP1	7.81129	0.34696	5.66044e-15	6.26138e-14
0	ESCO2	7.79664	1.1205	6.3577e-15	7.02364e-14
0	NRM	7.79623	0.569981	6.37845e-15	7.04206e-14
0	RBPJ	7.79249	0.386231	6.56999e-15	7.24888e-14
0	FEZF2	7.78882	0.498731	6.76357e-15	7.45768e-14
0	RNASEH2C	7.78591	0.560723	6.92119e-15	7.62659e-14
0	CFAP36	7.78233	0.384502	7.11996e-15	7.83903e-14
0	PAX3	7.78015	0.657132	7.24407e-15	7.96709e-14
0	AZI2	7.77959	0.440145	7.27625e-15	7.99228e-14
0	MCRIP1	7.77654	0.350998	7.45359e-15	8.18185e-14
0	SOD1	7.77598	0.339372	7.48649e-15	8.21272e-14
0	ISCU	7.77274	0.366013	7.68076e-15	8.40893e-14
0	TERF1	7.77267	0.449941	7.68487e-15	8.40893e-14
0	CCDC112	7.76805	0.409637	7.97003e-15	8.70989e-14
0	NDUFB9	7.76681	0.340252	8.04906e-15	8.7851e-14
0	BPTF	7.76548	0.323179	8.13375e-15	8.8663e-14
0	ADGRL3	7.76347	0.430627	8.26357e-15	9.00212e-14
0	MEPCE	7.75839	0.498418	8.60158e-15	9.35259e-14
0	CCNJ	7.75548	0.525572	8.80102e-15	9.55738e-14
0	NCOA5	7.75324	0.462316	8.95772e-15	9.71529e-14
0	GADD45GIP1	7.74951	0.381283	9.22488e-15	9.99246e-14
0	POLR2D	7.74489	0.434886	9.56644e-15	1.03559e-13
0	PHF20	7.72805	0.463987	1.09205e-14	1.17994e-13
0	FAM171A1	7.72478	0.468591	1.1205e-14	1.20993e-13
0	HRAS	7.71955	0.405416	1.16741e-14	1.2598e-13
0	DNA2	7.71486	0.441792	1.21113e-14	1.30534e-13
0	ATMIN	7.71069	0.450493	1.25139e-14	1.34789e-13
0	TMEM65	7.70255	0.432961	1.33381e-14	1.43486e-13
0	RSPO2	7.70171	0.576646	1.34256e-14	1.44337e-13
0	MYL12A	7.7009	0.63979	1.3511e-14	1.45166e-13
0	GPN3	7.69603	0.599888	1.4036e-14	1.50712e-13
0	MMADHC	7.69594	0.427451	1.40459e-14	1.50724e-13
0	NDUFA4	7.68493	0.32767	1.53075e-14	1.64058e-13
0	ME2	7.68378	0.405299	1.54466e-14	1.65446e-13
0	SEC22C	7.68225	0.48343	1.56316e-14	1.67323e-13
0	HIKESHI	7.67678	0.755357	1.63138e-14	1.74301e-13
0	NELFB	7.66555	0.399304	1.78065e-14	1.89426e-13
0	ZNF331	7.66488	0.593601	1.79005e-14	1.90308e-13
0	BUD31	7.66404	0.346665	1.80178e-14	1.91438e-13
0	ARL4A	7.66298	0.839037	1.81666e-14	1.92899e-13
0	FOXJ1	7.65942	0.464196	1.86777e-14	1.9809e-13
0	FUNDC2	7.65941	0.635698	1.86784e-14	1.9809e-13
0	MLF1	7.65763	0.36163	1.8939e-14	2.0073e-13
0	ALPL	7.65655	0.586875	1.90996e-14	2.02308e-13
0	TLNRD1	7.65108	0.649143	1.99299e-14	2.10973e-13
0	TMEM123	7.64736	0.356755	2.05144e-14	2.16893e-13
0	ARID1B	7.64512	0.362249	2.08752e-14	2.20573e-13
0	HDAC3	7.63774	0.445611	2.21062e-14	2.33436e-13
0	DDX20	7.62827	0.517942	2.37924e-14	2.50935e-13
0	RBIS	7.6266	0.56872	2.41019e-14	2.54044e-13
0	NBN	7.62527	0.48222	2.43527e-14	2.5653e-13
0	TMED2	7.62414	0.369141	2.4567e-14	2.58629e-13
0	COMMD2	7.6182	0.385041	2.5723e-14	2.70303e-13
0	MLST8	7.61451	0.412023	2.64696e-14	2.77809e-13
0	MASTL	7.60752	0.567698	2.79396e-14	2.9306e-13
0	NDUFS4	7.6069	0.335978	2.80743e-14	2.94293e-13
0	PEF1	7.60357	0.449581	2.88077e-14	3.01798e-13
0	FAM117B	7.60235	0.417901	2.90801e-14	3.04466e-13
0	FKBP8	7.60184	0.353557	2.91938e-14	3.05471e-13
0	TRA2B	7.60158	0.325301	2.92546e-14	3.05921e-13
0	NUTF2	7.59804	0.342182	3.00656e-14	3.1402e-13
0	NOP10	7.59773	0.400111	3.01362e-14	3.14567e-13
0	EMC6	7.59494	0.42716	3.07931e-14	3.20888e-13
0	TMEM126A	7.59484	0.511147	3.08163e-14	3.20888e-13
0	PCBD2	7.59199	1.37342	3.15021e-14	3.27831e-13
0	RANGRF	7.58822	0.45824	3.2432e-14	3.37304e-13
0	WAC	7.58783	0.375377	3.25299e-14	3.38118e-13
0	AKR1B1	7.58513	0.381131	3.32145e-14	3.45026e-13
0	AIMP2	7.58001	0.494998	3.45524e-14	3.58707e-13
0	HCFC1	7.57834	0.394733	3.5001e-14	3.63146e-13
0	SIK3	7.57755	0.406063	3.52137e-14	3.64914e-13
0	APEX1	7.57	0.341239	3.73213e-14	3.86289e-13
0	TMEM183A	7.5674	0.320246	3.80774e-14	3.93878e-13
0	GABARAP	7.55182	0.344095	4.29216e-14	4.42923e-13
0	BCAS2	7.55079	0.370825	4.32623e-14	4.46172e-13
0	ODF2L	7.54956	0.602009	4.3672e-14	4.50128e-13
0	MAP2K4	7.54829	0.362436	4.41002e-14	4.53998e-13
0	SLIT3	7.54789	0.453991	4.42368e-14	4.55132e-13
0	TST	7.53895	0.761379	4.73759e-14	4.86557e-13
0	DNAJB1	7.53371	0.353085	4.93187e-14	5.06208e-13
0	CHEK1	7.53203	0.373441	4.99592e-14	5.12171e-13
0	MAGI3	7.52702	0.414146	5.19108e-14	5.31545e-13
0	EBPL	7.51883	0.406346	5.52686e-14	5.65256e-13
0	TOMM22	7.51636	0.354674	5.63204e-14	5.75671e-13
0	P4HB	7.51374	0.346868	5.74612e-14	5.86983e-13
0	S100A13	7.51363	0.392778	5.751e-14	5.87134e-13
0	C12orf57	7.4998	0.297765	6.39157e-14	6.52145e-13
0	SNX25	7.49702	0.700023	6.52836e-14	6.65707e-13
0	RWDD1	7.49226	0.381997	6.76966e-14	6.89089e-13
0	FUS	7.49155	0.354054	6.80666e-14	6.92446e-13
0	CCDC148	7.48578	0.854665	7.11221e-14	7.23103e-13
0	SEC61G	7.48389	0.351729	7.21525e-14	7.33146e-13
0	SMAP1	7.48275	0.375453	7.27827e-14	7.38678e-13
0	SASH1	7.48235	0.485895	7.30072e-14	7.4052e-13
0	RSF1	7.47946	0.339336	7.46311e-14	7.56101e-13
0	PHB2	7.47616	0.487549	7.65257e-14	7.74384e-13
0	ITGB1BP1	7.47588	0.521179	7.66865e-14	7.75556e-13
0	KATNA1	7.47074	0.691336	7.97453e-14	8.05544e-13
0	PCMT1	7.46859	0.324586	8.10585e-14	8.1833e-13
0	FUZ	7.46672	0.539808	8.22194e-14	8.29563e-13
0	ZNF207	7.45807	0.401536	8.78011e-14	8.84844e-13
0	NHP2	7.45192	0.339646	9.19947e-14	9.26565e-13
0	CUX2	7.44247	0.532897	9.88185e-14	9.9413e-13
0	CLTA	7.43789	0.336826	1.02309e-13	1.02864e-12
0	UBE2K	7.43659	0.357594	1.03319e-13	1.03759e-12
0	ING3	7.41935	0.608886	1.17693e-13	1.17919e-12
0	ZNF771	7.41288	0.696139	1.23586e-13	1.23751e-12
0	DSP	7.41136	0.777686	1.25007e-13	1.25102e-12
0	LAMTOR5	7.41069	0.344694	1.25642e-13	1.25664e-12
0	ADARB2	7.40653	1.72303	1.2965e-13	1.29522e-12
0	LRRN1	7.40586	0.337099	1.30302e-13	1.30098e-12
0	DENND5A	7.4043	0.338165	1.31842e-13	1.31559e-12
0	CREB3L2	7.4031	0.532335	1.33046e-13	1.32684e-12
0	TDG	7.40281	0.470752	1.33333e-13	1.32893e-12
0	TTC28	7.40031	0.35315	1.3587e-13	1.35343e-12
0	DCLRE1C	7.40011	0.859258	1.36067e-13	1.35461e-12
0	EGR1	7.39787	0.447482	1.38387e-13	1.37689e-12
0	CLYBL	7.39775	0.549725	1.38513e-13	1.37689e-12
0	BAZ1A	7.39772	0.439569	1.38544e-13	1.37689e-12
0	ATRAID	7.39218	0.330858	1.44445e-13	1.4347e-12
0	SCAF11	7.39055	0.35363	1.46217e-13	1.45147e-12
0	B9D2	7.38938	0.856785	1.47516e-13	1.46351e-12
0	PKN1	7.38654	0.330592	1.50704e-13	1.49257e-12
0	TRAPPC2L	7.38593	0.449887	1.51392e-13	1.49852e-12
0	SYCE1L	7.3831	0.886548	1.54648e-13	1.529e-12
0	CTDSPL2	7.37475	0.358032	1.6465e-13	1.62694e-12
0	EFCAB2	7.36963	0.472522	1.71105e-13	1.68976e-12
0	PSMG2	7.36942	0.37068	1.71377e-13	1.69148e-12
0	EPRS	7.36866	0.310564	1.7235e-13	1.70011e-12
0	CASC4	7.36668	0.349438	1.74923e-13	1.72351e-12
0	TMEM165	7.36644	0.411264	1.75247e-13	1.72571e-12
0	RABAC1	7.35684	0.318438	1.88316e-13	1.8523e-12
0	AJUBA	7.35053	0.595387	1.97418e-13	1.94072e-12
0	ADGRV1	7.34956	0.385409	1.9886e-13	1.95377e-12
0	YAF2	7.34639	0.358582	2.03639e-13	1.99959e-12
0	CWF19L2	7.3411	0.373392	2.11846e-13	2.0778e-12
0	C12orf49	7.33918	0.828721	2.14913e-13	2.10668e-12
0	CETN2	7.33761	0.325709	2.17445e-13	2.13029e-12
0	TCEAL4	7.33576	0.353973	2.20474e-13	2.15751e-12
0	ELP6	7.33401	0.482917	2.23368e-13	2.18459e-12
0	HPF1	7.33157	0.546364	2.27476e-13	2.22224e-12
0	SMIM20	7.32308	0.435706	2.42335e-13	2.36338e-12
0	PPM1B	7.32245	0.369814	2.43489e-13	2.37195e-12
0	NDUFAB1	7.31981	0.317986	2.48319e-13	2.41627e-12
0	TXNDC17	7.31904	0.357193	2.4975e-13	2.42861e-12
0	HNRNPLL	7.31592	0.34398	2.55629e-13	2.48179e-12
0	SSH2	7.31113	0.54044	2.64904e-13	2.57039e-12
0	C1orf35	7.30958	0.388342	2.67978e-13	2.59876e-12
0	CDC5L	7.30881	0.340437	2.69517e-13	2.6122e-12
0	RNF2	7.30066	0.435923	2.8635e-13	2.76757e-12
0	PSMC5	7.29838	0.337535	2.91258e-13	2.81342e-12
0	SEC62	7.285	0.324904	3.21682e-13	3.10036e-12
0	ECHDC1	7.2789	0.408207	3.36543e-13	3.24176e-12
0	GIPC1	7.26638	0.345666	3.69252e-13	3.55088e-12
0	FHL2	7.26054	0.938366	3.85548e-13	3.70345e-12
0	SNX2	7.25829	0.342021	3.92025e-13	3.76357e-12
0	PQBP1	7.25456	0.338494	4.02984e-13	3.86663e-12
0	RSPO1	7.24895	0.3728	4.20013e-13	4.02778e-12
0	CTNND2	7.24225	0.343859	4.41294e-13	4.2295e-12
0	PEG10	7.24173	0.316059	4.42987e-13	4.24336e-12
0	ANAPC7	7.24095	0.37693	4.45564e-13	4.26568e-12
0	SLK	7.23575	0.40131	4.62964e-13	4.42979e-12
0	SNRNP48	7.23045	0.479999	4.8138e-13	4.60345e-12
0	MTX1	7.22959	0.494108	4.84468e-13	4.6304e-12
0	PLCB1	7.2258	0.466687	4.98162e-13	4.75865e-12
0	DDT	7.22528	0.422426	5.00075e-13	4.77428e-12
0	USP14	7.2233	0.3138	5.07424e-13	4.84176e-12
0	POC5	7.21715	0.916222	5.30879e-13	5.06275e-12
0	RNF114	7.21333	0.377497	5.46006e-13	5.20413e-12
0	SPAG1	7.20403	0.633454	5.84582e-13	5.5595e-12
0	CDC26	7.20371	0.45447	5.85947e-13	5.56941e-12
0	NELL2	7.19991	0.352899	6.02521e-13	5.72063e-12
0	PDLIM5	7.19847	0.380518	6.0893e-13	5.77829e-12
0	WDR34	7.19736	0.379394	6.13911e-13	5.82235e-12
0	UQCC2	7.19017	0.334202	6.4709e-13	6.13027e-12
0	YIF1B	7.18912	0.42209	6.52095e-13	6.16751e-12
0	UFC1	7.18283	0.316068	6.82833e-13	6.45114e-12
0	ST6GAL2	7.18207	0.356428	6.86626e-13	6.48342e-12
0	PSME1	7.1729	0.37055	7.34265e-13	6.92945e-12
0	RAB11A	7.1696	0.321899	7.52195e-13	7.09089e-12
0	MTPN	7.167	0.324887	7.6659e-13	7.21869e-12
0	LGALS1	7.16532	1.45058	7.76044e-13	7.30372e-12
0	ISOC2	7.1605	0.620841	8.03826e-13	7.56105e-12
0	TEX9	7.1566	0.365531	8.27026e-13	7.76656e-12
0	CTR9	7.15238	0.409987	8.52833e-13	8.00455e-12
0	SNX17	7.14943	0.360589	8.71372e-13	8.16965e-12
0	CAPZB	7.14764	0.31543	8.82796e-13	8.26775e-12
0	VRK3	7.13694	0.532087	9.54287e-13	8.93244e-12
0	CTNNBL1	7.12502	0.375168	1.04069e-12	9.71917e-12
0	CENPS	7.12495	0.491715	1.04116e-12	9.71917e-12
0	TRMT10A	7.11728	0.69085	1.10081e-12	1.02593e-11
0	EIF3A	7.11372	0.3342	1.12956e-12	1.05216e-11
0	CERS2	7.1098	0.424161	1.16213e-12	1.08133e-11
0	GNB4	7.10754	0.735848	1.18126e-12	1.09794e-11
0	ACSL3	7.10624	0.349334	1.1925e-12	1.10779e-11
0	NXN	7.10507	0.336978	1.2026e-12	1.11657e-11
0	HAUS1	7.10182	0.396466	1.23123e-12	1.14254e-11
0	UQCR11	7.09179	0.347111	1.32389e-12	1.22786e-11
0	PRDX5	7.09041	0.322685	1.33719e-12	1.23953e-11
0	BCAP31	7.08963	0.33532	1.34466e-12	1.24578e-11
0	CZIB	7.08899	0.388054	1.35092e-12	1.25091e-11
0	TMEM126B	7.08872	0.405431	1.35356e-12	1.25268e-11
0	PPP4R2	7.08417	0.351174	1.39884e-12	1.29389e-11
0	FBXO34	7.073	0.506963	1.51616e-12	1.3994e-11
0	RRAS2	7.06955	0.388564	1.55437e-12	1.43313e-11
0	TET1	7.06332	0.33346	1.6257e-12	1.4973e-11
0	TGFBR1	7.05714	0.349248	1.69969e-12	1.56461e-11
0	POLR2E	7.05547	0.328806	1.72024e-12	1.58267e-11
0	MED13L	7.05393	0.342764	1.73933e-12	1.59938e-11
0	CREB1	7.05172	0.327391	1.76723e-12	1.62417e-11
0	CTNNB1	7.04647	0.320276	1.83513e-12	1.68568e-11
0	TLE4	7.04567	0.342822	1.84567e-12	1.69445e-11
0	RSRC2	7.04495	0.308717	1.85527e-12	1.70236e-11
0	HADHA	7.0407	0.308093	1.91278e-12	1.75335e-11
0	CEP89	7.03849	0.353557	1.94329e-12	1.78028e-11
0	CSNK2B	7.03813	0.375516	1.94838e-12	1.78399e-11
0	BMPR2	7.03605	0.378961	1.97769e-12	1.80891e-11
0	CXCR4	7.03399	0.413858	2.00712e-12	1.83485e-11
0	SEC11A	7.02566	0.306361	2.13055e-12	1.94562e-11
0	SLTM	7.02193	0.318005	2.18824e-12	1.99725e-11
0	FOSB	7.02075	0.501455	2.20678e-12	2.01311e-11
0	POP7	7.01971	0.4346	2.2233e-12	2.0271e-11
0	SORBS3	7.01746	0.438946	2.25936e-12	2.0578e-11
0	LLPH	6.99495	0.519204	2.65352e-12	2.41042e-11
0	TSN	6.99369	0.324318	2.67752e-12	2.43094e-11
0	DMRT3	6.99345	0.462976	2.68216e-12	2.43319e-11
0	RAB1A	6.9893	0.309537	2.76256e-12	2.50287e-11
0	EIF3M	6.97461	0.301584	3.06711e-12	2.77296e-11
0	BRMS1	6.97024	0.457107	3.16411e-12	2.85773e-11
0	COX16	6.97023	0.303406	3.16419e-12	2.85773e-11
0	CA14	6.96875	0.667538	3.19763e-12	2.88642e-11
0	PCNT	6.96699	0.411965	3.23801e-12	2.92133e-11
0	COL9A1	6.96362	0.583837	3.31633e-12	2.99043e-11
0	CEP85	6.95961	0.492787	3.41204e-12	3.07512e-11
0	TFG	6.9578	0.311287	3.4563e-12	3.11339e-11
0	ACOT7	6.9525	0.391354	3.58874e-12	3.2293e-11
0	USP24	6.95041	0.32843	3.64228e-12	3.27577e-11
0	NUP54	6.94788	0.33307	3.70822e-12	3.33159e-11
0	PLXDC2	6.94456	0.448283	3.79633e-12	3.40897e-11
0	SAMD4B	6.93747	0.319125	3.99196e-12	3.57719e-11
0	TBC1D5	6.93609	0.322122	4.03089e-12	3.6102e-11
0	GNPNAT1	6.92172	0.810516	4.46188e-12	3.98998e-11
0	ARL2BP	6.91361	0.31504	4.72486e-12	4.22076e-11
0	DNM2	6.912	0.344977	4.77861e-12	4.26657e-11
0	LAMTOR2	6.91027	0.320539	4.83735e-12	4.31454e-11
0	PMVK	6.90958	0.34944	4.86073e-12	4.33091e-11
0	FAM120AOS	6.90444	0.435219	5.04035e-12	4.4863e-11
0	CSNK2A1	6.90193	0.355695	5.12995e-12	4.56134e-11
0	JAM3	6.89778	0.336447	5.28213e-12	4.68697e-11
0	DYNC1H1	6.88229	0.310585	5.88995e-12	5.2102e-11
0	TLE3	6.87926	0.466058	6.01636e-12	5.31929e-11
0	ABCF1	6.87724	0.30654	6.10252e-12	5.38993e-11
0	TCF12	6.87304	0.313362	6.28469e-12	5.54798e-11
0	TBCB	6.86983	0.318923	6.42798e-12	5.67158e-11
0	CIAO2B	6.86826	0.336498	6.49877e-12	5.72817e-11
0	UPF3A	6.86756	0.327771	6.5308e-12	5.75345e-11
0	RAB2A	6.86477	0.300535	6.65972e-12	5.86403e-11
0	ALDH16A1	6.86142	0.655155	6.81802e-12	5.99728e-11
0	RAB1B	6.85993	0.361747	6.88966e-12	6.05721e-11
0	METTL4	6.85925	0.712188	6.92248e-12	6.08295e-11
0	CEP152	6.85654	0.599099	7.0546e-12	6.19589e-11
0	AL162231.1	6.85511	0.864878	7.12565e-12	6.2551e-11
0	ARPC3	6.85186	0.39345	7.2894e-12	6.38907e-11
0	RASSF8	6.8491	0.336634	7.43171e-12	6.5105e-11
0	TRABD2B	6.84455	0.865096	7.67172e-12	6.71392e-11
0	FIBP	6.8425	0.374994	7.78209e-12	6.80706e-11
0	TTYH1	6.84174	0.407015	7.82352e-12	6.83982e-11
0	SREK1IP1	6.83986	0.410302	7.92719e-12	6.91992e-11
0	C19orf53	6.83486	0.325964	8.20827e-12	7.15657e-11
0	ZNF43	6.83482	0.512399	8.21076e-12	7.15657e-11
0	ARF5	6.83271	0.339102	8.33245e-12	7.2553e-11
0	MANF	6.83246	0.338613	8.34699e-12	7.26429e-11
0	UBE2J2	6.82647	0.363956	8.70287e-12	7.56254e-11
0	RBM42	6.82615	0.339239	8.72247e-12	7.57386e-11
0	DNAJC7	6.82482	0.306995	8.80356e-12	7.63847e-11
0	SMO	6.81652	0.342848	9.32706e-12	8.08454e-11
0	JMJD1C	6.8139	0.33997	9.49872e-12	8.22506e-11
0	SH3D19	6.81248	0.479145	9.59334e-12	8.30282e-11
0	FAM181A	6.81228	0.526288	9.60644e-12	8.30998e-11
0	TSEN15	6.81166	0.543628	9.64816e-12	8.34188e-11
0	SPPL3	6.81121	0.31968	9.67791e-12	8.3634e-11
0	PPM1G	6.80734	0.319456	9.94176e-12	8.57473e-11
0	CBFB	6.80733	0.346737	9.94236e-12	8.57473e-11
0	EWSR1	6.80304	0.307053	1.02431e-11	8.82969e-11
0	MED19	6.7995	0.489758	1.04986e-11	9.04542e-11
0	SNAPIN	6.79905	0.357485	1.05313e-11	9.06905e-11
0	RBM39	6.79621	0.319566	1.07411e-11	9.24506e-11
0	NME2	6.79017	0.321653	1.12002e-11	9.61616e-11
0	CBY1	6.78727	0.403995	1.14275e-11	9.80646e-11
0	C1QBP	6.78482	0.358663	1.16229e-11	9.96922e-11
0	DDX52	6.78461	0.328388	1.164e-11	9.97889e-11
0	RAB9A	6.7769	0.50804	1.22783e-11	1.05e-10
0	UBAP2	6.77681	0.442613	1.2286e-11	1.05013e-10
0	FSTL1	6.77636	0.398899	1.23241e-11	1.05287e-10
0	FABP5	6.7748	0.428527	1.24575e-11	1.06321e-10
0	RNF181	6.76504	0.393049	1.33276e-11	1.13578e-10
0	TOMM7	6.74929	0.284906	1.48568e-11	1.26298e-10
0	TP53I13	6.7488	0.573984	1.49071e-11	1.26662e-10
0	ZC3H13	6.74454	0.315592	1.53511e-11	1.30307e-10
0	MAGOHB	6.74311	0.732385	1.55031e-11	1.31532e-10
0	COX7C	6.73519	0.291819	1.6372e-11	1.38835e-10
0	MAN1A2	6.73152	0.342323	1.67904e-11	1.42244e-10
0	NEURL1B	6.72828	1.11003	1.71676e-11	1.45296e-10
0	PTOV1	6.72644	0.295337	1.73861e-11	1.47073e-10
0	BMI1	6.72414	0.471035	1.76634e-11	1.49272e-10
0	MBNL1	6.723	0.444699	1.78023e-11	1.50372e-10
0	DENND10	6.71932	0.381551	1.82571e-11	1.54063e-10
0	PWP1	6.7136	0.368843	1.8988e-11	1.59839e-10
0	SMYD3	6.70938	0.400472	1.95447e-11	1.64284e-10
0	PSMA5	6.70914	0.53793	1.95771e-11	1.64476e-10
0	LRRFIP2	6.70892	0.393318	1.96076e-11	1.64652e-10
0	ARL5B	6.69972	0.338982	2.08816e-11	1.7518e-10
0	PGK1	6.6977	0.499997	2.11724e-11	1.77446e-10
0	MCUR1	6.69687	0.404448	2.12937e-11	1.78289e-10
0	SMARCA5	6.69567	0.301213	2.14691e-11	1.79409e-10
0	SPATS2	6.69162	0.311345	2.20712e-11	1.84351e-10
0	AGPAT5	6.69091	0.330731	2.21791e-11	1.85163e-10
0	PAX7	6.68945	0.566804	2.24018e-11	1.86931e-10
0	SMPD4	6.68709	0.374884	2.27645e-11	1.89774e-10
0	TADA1	6.68469	0.468626	2.3142e-11	1.92827e-10
0	ENSA	6.68387	0.281187	2.32707e-11	1.93806e-10
0	ARHGAP33	6.68348	0.334504	2.33331e-11	1.94232e-10
0	ERCC1	6.67993	0.312751	2.39055e-11	1.98901e-10
0	ROCK2	6.67946	0.330962	2.39829e-11	1.99449e-10
0	SAR1A	6.67735	0.572673	2.433e-11	2.01945e-10
0	FBXW11	6.67554	0.318924	2.46329e-11	2.04361e-10
0	ORMDL2	6.67477	0.41323	2.47613e-11	2.05327e-10
0	MGST3	6.6692	0.28549	2.57206e-11	2.12872e-10
0	UBQLN1	6.66911	0.307551	2.57358e-11	2.12895e-10
0	C20orf27	6.66451	0.697484	2.65551e-11	2.19462e-10
0	CYTH3	6.66396	0.515029	2.66538e-11	2.20172e-10
0	RASSF1	6.66005	0.777545	2.73739e-11	2.25796e-10
0	TRAPPC3	6.65681	0.323793	2.79836e-11	2.30714e-10
0	RBM27	6.65566	0.306977	2.82035e-11	2.32194e-10
0	SAP30L	6.65557	0.427885	2.82198e-11	2.32217e-10
0	LARP1	6.64929	0.30254	2.94518e-11	2.42008e-10
0	ZNF536	6.64728	0.453769	2.98561e-11	2.45096e-10
0	ANAPC16	6.64421	0.30342	3.04856e-11	2.50145e-10
0	GPR161	6.64342	0.356222	3.06495e-11	2.5137e-10
0	ARMC10	6.64141	0.373333	3.10688e-11	2.54687e-10
0	MTBP	6.6409	0.599089	3.11766e-11	2.55449e-10
0	NIPSNAP2	6.63626	0.324967	3.21751e-11	2.6313e-10
0	TIMM17A	6.63545	0.321439	3.2351e-11	2.64443e-10
0	ACIN1	6.63318	0.309626	3.28537e-11	2.68424e-10
0	THAP3	6.62844	0.471918	3.39251e-11	2.76916e-10
0	SPCS1	6.62403	0.290437	3.49546e-11	2.85062e-10
0	EXTL2	6.62252	0.373452	3.53138e-11	2.87842e-10
0	GLDC	6.6209	0.342323	3.57026e-11	2.90873e-10
0	OSER1	6.61849	0.359362	3.62885e-11	2.95367e-10
0	TRAPPC5	6.60628	0.317478	3.94089e-11	3.2016e-10
0	KATNAL2	6.59809	0.81027	4.16489e-11	3.38039e-10
0	MAGI1	6.59346	0.338047	4.29685e-11	3.48257e-10
0	MRTO4	6.59334	0.438008	4.30052e-11	3.48391e-10
0	TRAF3IP1	6.593	0.467874	4.31029e-11	3.49018e-10
0	HSPA4	6.59055	0.296298	4.38192e-11	3.54652e-10
0	KCTD9	6.58491	0.51899	4.55151e-11	3.68204e-10
0	RB1CC1	6.58144	0.309063	4.65911e-11	3.76555e-10
0	FAM107B	6.57909	0.326915	4.73347e-11	3.82386e-10
0	NR1D2	6.57783	0.365908	4.77371e-11	3.85274e-10
0	MIER1	6.5754	0.282457	4.85241e-11	3.91076e-10
0	ZNF92	6.5741	0.336883	4.89494e-11	3.94159e-10
0	ANO6	6.57409	0.399478	4.89523e-11	3.94159e-10
0	PLS3	6.5739	0.270137	4.90135e-11	3.94467e-10
0	CNN2	6.56913	0.316665	5.06104e-11	4.07129e-10
0	GPBP1L1	6.5666	0.297574	5.14773e-11	4.1333e-10
0	FEZ2	6.56531	0.379257	5.19261e-11	4.1674e-10
0	GLRX3	6.56093	0.311944	5.34736e-11	4.28959e-10
0	DDIAS	6.56029	1.11247	5.37039e-11	4.30606e-10
0	ARPP19	6.55898	0.30494	5.41774e-11	4.34201e-10
0	PTPN2	6.55598	0.462522	5.52768e-11	4.42805e-10
0	EHMT2	6.55207	0.295869	5.67447e-11	4.54142e-10
0	MDH2	6.55159	0.273524	5.69271e-11	4.5539e-10
0	NDUFA13	6.5511	0.321416	5.71148e-11	4.56679e-10
0	USP7	6.54755	0.332339	5.84868e-11	4.67433e-10
0	HES6	6.54162	0.365433	6.08573e-11	4.85702e-10
0	SNX5	6.54064	0.34644	6.12579e-11	4.88673e-10
0	SMIM30	6.53856	0.409313	6.21157e-11	4.95287e-10
0	MICAL3	6.53705	0.357451	6.27432e-11	4.99827e-10
0	PSENEN	6.5354	0.352168	6.34408e-11	5.05151e-10
0	MAP4K4	6.53519	0.309903	6.35292e-11	5.05621e-10
0	RETREG2	6.52854	0.406769	6.64149e-11	5.27613e-10
0	TSSC4	6.52422	0.328658	6.83549e-11	5.42774e-10
0	TYW3	6.52197	0.402401	6.93877e-11	5.50721e-10
0	RFX2	6.51934	0.387558	7.06154e-11	5.59949e-10
0	RALBP1	6.51819	0.33997	7.11618e-11	5.64022e-10
0	SFT2D2	6.51697	0.412902	7.17439e-11	5.67851e-10
0	C4orf46	6.5152	0.683941	7.25904e-11	5.74288e-10
0	CCDC117	6.51199	0.453412	7.4161e-11	5.86175e-10
0	DYNLRB1	6.50799	0.296063	7.61634e-11	6.01726e-10
0	NME6	6.50552	0.522438	7.7424e-11	6.11405e-10
0	IFT88	6.49747	0.363404	8.16842e-11	6.44751e-10
0	TUBB2B	6.49247	0.195448	8.44419e-11	6.65908e-10
0	PPT1	6.49201	0.33543	8.47002e-11	6.67639e-10
0	POLR2G	6.4915	0.287577	8.49868e-11	6.69592e-10
0	CFAP97	6.48898	0.384139	8.64189e-11	6.80253e-10
0	ANKRD28	6.48877	0.330079	8.65375e-11	6.80875e-10
0	ALDH9A1	6.48476	0.350011	8.88721e-11	6.98286e-10
0	TLK1	6.4782	0.307266	9.28208e-11	7.28315e-10
0	NENF	6.47588	0.463633	9.42582e-11	7.38921e-10
0	OLIG3	6.47495	1.57778	9.4842e-11	7.42822e-10
0	MAP3K20	6.47471	0.433105	9.49927e-11	7.43663e-10
0	RLIM	6.47004	0.312987	9.79746e-11	7.66311e-10
0	SRSF4	6.46907	0.274734	9.86047e-11	7.7054e-10
0	PRKRA	6.46772	0.312456	9.94945e-11	7.7714e-10
0	MPZL1	6.46727	0.317202	9.97886e-11	7.79084e-10
0	PKN2	6.46086	0.272208	1.04109e-10	8.12079e-10
0	TMEM107	6.45799	0.401253	1.06105e-10	8.26896e-10
0	PRKAG1	6.45354	0.380885	1.09269e-10	8.51172e-10
0	GNPAT	6.45199	0.345367	1.10392e-10	8.59141e-10
0	PGAM1	6.45081	0.533112	1.11253e-10	8.65451e-10
0	KCNMB4	6.4476	0.447235	1.13638e-10	8.83608e-10
0	CFAP43	6.44574	0.565063	1.15035e-10	8.94067e-10
0	TRAM1	6.44104	0.315602	1.18655e-10	9.21784e-10
0	GTF3C5	6.44035	0.428495	1.19198e-10	9.25584e-10
0	TEDC1	6.43006	0.70134	1.27557e-10	9.89598e-10
0	GCFC2	6.42913	0.53997	1.2834e-10	9.94779e-10
0	DDOST	6.4287	0.289467	1.287e-10	9.97117e-10
0	MORN2	6.42716	0.400081	1.30013e-10	1.00684e-09
0	RCN2	6.42566	0.308098	1.31301e-10	1.01636e-09
0	LZTFL1	6.42543	0.383085	1.31495e-10	1.0174e-09
0	PPP2R3C	6.42505	0.359346	1.31829e-10	1.01953e-09
0	ZSWIM6	6.42083	0.299042	1.35536e-10	1.04773e-09
0	NUAK1	6.41398	0.430996	1.41773e-10	1.09545e-09
0	TTC1	6.41353	0.329707	1.42184e-10	1.09813e-09
0	ORC2	6.41295	0.376171	1.42729e-10	1.10136e-09
0	CHCHD1	6.41172	0.316997	1.43885e-10	1.10978e-09
0	GTF3A	6.40577	0.482535	1.49609e-10	1.15238e-09
0	RNF38	6.40485	0.297673	1.50513e-10	1.1583e-09
0	TCF7L2	6.40375	0.338296	1.51611e-10	1.16623e-09
0	ABCE1	6.39827	0.41514	1.57146e-10	1.20666e-09
0	JADE3	6.39437	0.485719	1.61205e-10	1.23672e-09
0	PPP1R12A	6.3911	0.285435	1.647e-10	1.26297e-09
0	KAT5	6.38957	0.464207	1.66358e-10	1.27511e-09
0	PYCR1	6.38207	0.450606	1.74708e-10	1.33733e-09
0	C9orf78	6.3767	0.360276	1.80944e-10	1.38384e-09
0	CITED2	6.37246	0.2745	1.86022e-10	1.42204e-09
0	ZWILCH	6.36835	0.491213	1.91076e-10	1.46003e-09
0	SAV1	6.36506	0.466224	1.95215e-10	1.491e-09
0	PIEZO2	6.3648	0.52594	1.95542e-10	1.49283e-09
0	REXO5	6.36264	1.35746	1.98313e-10	1.51331e-09
0	CDK8	6.35791	0.298351	2.04514e-10	1.55925e-09
0	THOC6	6.35746	0.39683	2.05116e-10	1.56315e-09
0	SF3B2	6.3569	0.266649	2.05868e-10	1.56819e-09
0	RNPEP	6.35564	0.430645	2.07564e-10	1.5804e-09
0	NUDT11	6.35341	0.548098	2.10591e-10	1.60274e-09
0	FOXN3	6.34974	0.377133	2.15685e-10	1.64006e-09
0	NDUFA1	6.34801	0.276271	2.18115e-10	1.65781e-09
0	MORC4	6.33958	0.553907	2.30386e-10	1.7503e-09
0	TP53I3	6.33903	0.434003	2.31215e-10	1.75583e-09
0	KIF9	6.33823	0.503073	2.32422e-10	1.76422e-09
0	SMURF2	6.33716	0.335549	2.34043e-10	1.77574e-09
0	SOX12	6.33585	0.306122	2.36034e-10	1.79006e-09
0	TMEM47	6.32652	0.351113	2.50756e-10	1.8992e-09
0	LMO4	6.3209	0.274099	2.6004e-10	1.96605e-09
0	HIRIP3	6.32082	0.538537	2.60178e-10	1.96623e-09
0	KLHL29	6.31671	0.59023	2.67185e-10	2.01654e-09
0	MTCH2	6.31638	0.378286	2.67765e-10	2.02003e-09
0	CRK	6.3155	0.296034	2.69291e-10	2.03065e-09
0	HS2ST1	6.31232	0.295017	2.74877e-10	2.07186e-09
0	NSMCE4A	6.31224	0.32922	2.75022e-10	2.07205e-09
0	NIFK	6.312	0.347624	2.75448e-10	2.07435e-09
0	ITM2B	6.30941	0.273442	2.80094e-10	2.10842e-09
0	SMAD9	6.30218	0.733308	2.93497e-10	2.20449e-09
0	DNTTIP2	6.30118	0.308781	2.95394e-10	2.21681e-09
0	RTN4	6.29904	0.28322	2.99495e-10	2.24661e-09
0	IGBP1	6.29474	0.281063	3.07914e-10	2.30775e-09
0	HACD3	6.29358	0.301904	3.10225e-10	2.32405e-09
0	CMTM3	6.29308	0.33371	3.11236e-10	2.33062e-09
0	SNRPD3	6.29261	0.665174	3.12164e-10	2.33655e-09
0	ACADVL	6.28763	0.297186	3.22358e-10	2.4118e-09
0	HIF1A	6.28313	0.336836	3.31826e-10	2.48049e-09
0	TADA3	6.27622	0.310581	3.46903e-10	2.58982e-09
0	CMSS1	6.27427	0.359336	3.51289e-10	2.62143e-09
0	GOLPH3L	6.26892	0.377003	3.6357e-10	2.71072e-09
0	SEC23A	6.26719	0.321008	3.67625e-10	2.73977e-09
0	NONO	6.26539	0.31384	3.71882e-10	2.7703e-09
0	SHMT2	6.26514	0.506518	3.72492e-10	2.77364e-09
0	IL17RD	6.2625	0.357291	3.78865e-10	2.81988e-09
0	CEP72	6.2575	0.497905	3.91197e-10	2.91041e-09
0	TARS	6.25622	0.569896	3.94419e-10	2.93311e-09
0	PIAS1	6.25586	0.276306	3.95342e-10	2.9387e-09
0	CERK	6.25568	0.328755	3.95799e-10	2.94083e-09
0	BMP7	6.25557	0.363704	3.96059e-10	2.9415e-09
0	SUV39H1	6.25504	1.09303	3.9741e-10	2.95025e-09
0	STXBP3	6.25278	0.35916	4.03203e-10	2.99068e-09
0	RNF20	6.25257	0.439541	4.03759e-10	2.99352e-09
0	ALKBH7	6.2506	0.276414	4.08873e-10	3.02883e-09
0	TRIAP1	6.24997	0.451848	4.10531e-10	3.0398e-09
0	STK24	6.24905	0.302243	4.12966e-10	3.05652e-09
0	REV3L	6.23686	0.351344	4.46432e-10	3.30137e-09
0	GEMIN6	6.23156	0.49097	4.61816e-10	3.41367e-09
0	AIMP1	6.23092	0.291413	4.63694e-10	3.42608e-09
0	NFU1	6.22369	0.345555	4.85611e-10	3.58495e-09
0	EML4	6.21832	0.290669	5.025e-10	3.70645e-09
0	ZNF281	6.21665	0.313747	5.07893e-10	3.74462e-09
0	LIN54	6.21623	0.480292	5.09254e-10	3.75305e-09
0	ZBTB10	6.21304	0.310604	5.1968e-10	3.82661e-09
0	ZNF148	6.21288	0.286289	5.20226e-10	3.829e-09
0	LUZP1	6.21205	0.332337	5.2297e-10	3.84755e-09
0	VEZF1	6.20928	0.287566	5.32269e-10	3.91429e-09
0	MGAT2	6.20527	0.506278	5.46023e-10	4.01372e-09
0	METTL7A	6.20377	1.79574	5.51262e-10	4.0505e-09
0	RABL3	6.20251	0.577958	5.55709e-10	4.08144e-09
0	GUCY1B1	6.19931	0.464557	5.67112e-10	4.16342e-09
0	KLHL23	6.18921	0.295423	6.0465e-10	4.43333e-09
0	FAM189B	6.18658	0.380513	6.14822e-10	4.50599e-09
0	SERPING1	6.1756	0.382242	6.59141e-10	4.82875e-09
0	UHRF1	6.17489	0.246909	6.62104e-10	4.84839e-09
0	DCAF13	6.16884	0.385826	6.8794e-10	5.02903e-09
0	R3HCC1	6.16791	0.371565	6.91985e-10	5.05645e-09
0	CCDC181	6.16595	0.418729	7.00613e-10	5.11732e-09
0	GDE1	6.16049	0.290202	7.25189e-10	5.2901e-09
0	PRKD3	6.15993	0.334714	7.27761e-10	5.30662e-09
0	SNRNP25	6.15734	0.280254	7.39786e-10	5.39202e-09
0	ZNF286A	6.15693	0.422443	7.41685e-10	5.40357e-09
0	DLG1	6.15464	0.295046	7.52474e-10	5.47754e-09
0	AKAP13	6.15293	0.296597	7.60628e-10	5.53456e-09
0	PBDC1	6.15271	0.365092	7.61687e-10	5.53992e-09
0	SLC25A6	6.15193	0.276301	7.65458e-10	5.565e-09
0	SNX15	6.15063	0.499561	7.71778e-10	5.60858e-09
0	GSK3A	6.1485	0.317184	7.82179e-10	5.67937e-09
0	ADIPOR2	6.14836	0.304261	7.82899e-10	5.6822e-09
0	C17orf97	6.14801	0.696642	7.84606e-10	5.69219e-09
0	PEMT	6.14741	0.403694	7.87573e-10	5.71132e-09
0	ASF1A	6.14728	0.34024	7.8822e-10	5.7136e-09
0	ESD	6.14701	0.28199	7.89592e-10	5.72114e-09
0	CDC42SE2	6.14624	0.279801	7.93394e-10	5.74627e-09
0	SUCLA2	6.14538	0.494204	7.97711e-10	5.77511e-09
0	SKP2	6.1451	0.415096	7.99108e-10	5.78279e-09
0	DCK	6.14429	0.462946	8.03209e-10	5.81003e-09
0	CCNH	6.1425	0.333335	8.12308e-10	5.87337e-09
0	CHCHD5	6.13717	0.329371	8.40036e-10	6.06622e-09
0	MAML3	6.13362	0.322179	8.59019e-10	6.19811e-09
0	CCDC88C	6.1334	0.337162	8.60192e-10	6.20397e-09
0	TAF4	6.12961	0.419104	8.80964e-10	6.35113e-09
0	GPN1	6.12834	0.379323	8.8799e-10	6.3991e-09
0	ZFPL1	6.1275	0.639026	8.92701e-10	6.43036e-09
0	ZNF260	6.12662	0.367085	8.97671e-10	6.46346e-09
0	MED25	6.12484	0.302104	9.07742e-10	6.52779e-09
0	KCTD20	6.12476	0.317124	9.08227e-10	6.52855e-09
0	UQCRC1	6.12245	0.302331	9.21493e-10	6.62114e-09
0	TARBP2	6.1191	0.613256	9.41027e-10	6.75305e-09
0	TAGLN2	6.1179	0.702056	9.48169e-10	6.80146e-09
0	ILKAP	6.09927	0.323172	1.06551e-09	7.62728e-09
0	ITSN1	6.09851	0.350654	1.07062e-09	7.66071e-09
0	NME7	6.08902	0.266723	1.13604e-09	8.11191e-09
0	QSER1	6.07823	0.295295	1.21518e-09	8.66267e-09
0	DACH1	6.07676	0.316263	1.22638e-09	8.73893e-09
0	EMD	6.07619	0.269672	1.2307e-09	8.7661e-09
0	CRYZ	6.07402	0.352672	1.24745e-09	8.88169e-09
0	HSPA13	6.06246	0.325163	1.34054e-09	9.54055e-09
0	COL26A1	6.06003	0.40796	1.36097e-09	9.68195e-09
0	PLEKHJ1	6.05223	0.312776	1.42855e-09	1.01585e-08
0	CCDC102A	6.04932	0.610206	1.45462e-09	1.03354e-08
0	ING2	6.04195	0.4374	1.52267e-09	1.08055e-08
0	TXNRD1	6.03853	0.282939	1.55524e-09	1.10275e-08
0	AKIRIN1	6.03744	0.25689	1.56576e-09	1.1093e-08
0	TSPAN13	6.03611	0.295311	1.57877e-09	1.11806e-08
0	PNO1	6.03115	0.519387	1.62799e-09	1.15008e-08
0	PRKCI	6.0309	0.351057	1.63049e-09	1.15137e-08
0	CDH6	6.02739	0.310877	1.66624e-09	1.17613e-08
0	KYAT3	6.02727	0.368758	1.66753e-09	1.17656e-08
0	TLE1	6.02223	0.293364	1.72035e-09	1.21184e-08
0	CDC42BPA	6.02154	0.299125	1.72769e-09	1.21652e-08
0	MAP3K8	6.01717	0.472923	1.77489e-09	1.24873e-08
0	SAYSD1	6.01611	0.721272	1.78654e-09	1.25641e-08
0	TMED9	6.01564	0.269962	1.79173e-09	1.25955e-08
0	FUNDC1	6.01095	0.340312	1.84445e-09	1.29397e-08
0	TMEM170A	6.01017	0.298613	1.85334e-09	1.29968e-08
0	COLEC12	6.00963	0.6326	1.85948e-09	1.30345e-08
0	UBE2A	6.00737	0.318051	1.88554e-09	1.32118e-08
0	CNTLN	6.00726	0.363285	1.88686e-09	1.32157e-08
0	ACYP1	6.00197	0.598952	1.94935e-09	1.36367e-08
0	FGD6	5.99579	0.455671	2.02495e-09	1.41426e-08
0	CDC14A	5.99539	0.312523	2.02997e-09	1.41662e-08
0	COA1	5.99267	0.294067	2.06424e-09	1.43995e-08
0	YTHDC1	5.98831	0.255877	2.12028e-09	1.47731e-08
0	BRI3	5.97377	0.248638	2.31832e-09	1.61262e-08
0	HDDC2	5.97048	0.304432	2.36556e-09	1.64302e-08
0	PGAP1	5.97046	0.289062	2.36584e-09	1.64302e-08
0	HMCES	5.95933	0.373662	2.53276e-09	1.7547e-08
0	PSMB4	5.95771	0.256959	2.55804e-09	1.7715e-08
0	GTF2I	5.9571	0.259362	2.56749e-09	1.77732e-08
0	C11orf49	5.95164	0.2664	2.65465e-09	1.83619e-08
0	VKORC1L1	5.95062	0.342913	2.67129e-09	1.84696e-08
0	ATF5	5.95022	0.461975	2.6779e-09	1.85078e-08
0	UBE2D1	5.94702	0.37249	2.73076e-09	1.8858e-08
0	C1orf198	5.94629	0.360661	2.74295e-09	1.89346e-08
0	WDR45B	5.9457	0.26497	2.75285e-09	1.89953e-08
0	EFHD1	5.94534	0.535996	2.75881e-09	1.90288e-08
0	RBMX2	5.94449	0.549995	2.77326e-09	1.91209e-08
0	MEX3C	5.94054	0.317108	2.84089e-09	1.95793e-08
0	EBP	5.93407	0.274932	2.95513e-09	2.03585e-08
0	GNA12	5.93319	0.596132	2.97109e-09	2.04602e-08
0	UBLCP1	5.9321	0.309213	2.99086e-09	2.05882e-08
0	SUGT1	5.93116	0.268177	3.00796e-09	2.06893e-08
0	PDE6D	5.92881	0.507587	3.05146e-09	2.09718e-08
0	ANXA6	5.9199	0.309897	3.2214e-09	2.21221e-08
0	FBXO21	5.91703	0.277862	3.27817e-09	2.2485e-08
0	FBXO43	5.91352	2.1253	3.34877e-09	2.2951e-08
0	PCNX4	5.91238	0.270158	3.37198e-09	2.30917e-08
0	NUDT2	5.9111	0.372926	3.39839e-09	2.32633e-08
0	POLR3GL	5.91039	0.3622	3.41307e-09	2.33545e-08
0	WBP4	5.90927	0.322541	3.43628e-09	2.3504e-08
0	IFT81	5.90544	0.267364	3.51712e-09	2.40474e-08
0	SMCHD1	5.89999	0.264049	3.63529e-09	2.48455e-08
0	SRP19	5.88894	0.25849	3.88685e-09	2.65437e-08
0	PAK1IP1	5.8877	0.466562	3.91611e-09	2.67223e-08
0	HSPB11	5.88268	0.29926	4.03666e-09	2.7534e-08
0	RAP1A	5.88083	0.322136	4.08215e-09	2.78333e-08
0	ILK	5.87706	0.295283	4.17607e-09	2.84511e-08
0	GSS	5.87682	0.36681	4.18225e-09	2.8482e-08
0	SIX5	5.87566	0.368894	4.21168e-09	2.86597e-08
0	ZNF521	5.87423	0.27487	4.24826e-09	2.88858e-08
0	AXIN2	5.87048	0.332991	4.3454e-09	2.95113e-08
0	NELFCD	5.86964	0.297068	4.36752e-09	2.96382e-08
0	RNH1	5.86776	0.278174	4.41724e-09	2.99402e-08
0	GLT8D1	5.86201	0.346935	4.57296e-09	3.09835e-08
0	PDE1A	5.85668	0.618109	4.72211e-09	3.19789e-08
0	KIF24	5.8561	0.778571	4.73867e-09	3.20684e-08
0	LARGE1	5.85206	0.32319	4.85531e-09	3.28448e-08
0	PTPRA	5.84699	0.274255	5.00562e-09	3.38218e-08
0	SSR4	5.84624	0.245214	5.02818e-09	3.39609e-08
0	VSTM2L	5.84228	0.487668	5.14901e-09	3.47498e-08
0	RYK	5.84045	0.32969	5.20589e-09	3.51199e-08
0	RFC5	5.84032	0.523856	5.21018e-09	3.51351e-08
0	GCAT	5.8381	0.49539	5.28008e-09	3.55786e-08
0	PRDX2	5.83617	0.278857	5.34149e-09	3.59783e-08
0	TRMT10C	5.83357	0.310371	5.42546e-09	3.65296e-08
0	GPC6	5.83339	0.367314	5.43134e-09	3.65549e-08
0	PRCP	5.82982	0.352062	5.54881e-09	3.73163e-08
0	ZNF217	5.82969	0.383436	5.55314e-09	3.73309e-08
0	NSFL1C	5.82312	0.258546	5.77576e-09	3.87821e-08
0	BEX2	5.82254	0.406382	5.79609e-09	3.88882e-08
0	RAB22A	5.82072	0.380327	5.85961e-09	3.92838e-08
0	TRAF2	5.81937	0.540643	5.90703e-09	3.95863e-08
0	TENM3	5.81775	0.290721	5.96467e-09	3.99457e-08
0	HAUS8	5.81034	0.785829	6.23454e-09	4.16955e-08
0	FARP2	5.80924	0.395026	6.27554e-09	4.19091e-08
0	PLPBP	5.80821	0.321043	6.31457e-09	4.21534e-08
0	TTF1	5.80469	0.384032	6.4487e-09	4.30155e-08
0	THOC2	5.79963	0.291601	6.64631e-09	4.42993e-08
0	PEX10	5.79843	0.473698	6.69395e-09	4.45996e-08
0	CIB2	5.79836	0.359869	6.69659e-09	4.45999e-08
0	POLR2I	5.79675	0.265443	6.76107e-09	4.49772e-08
0	HNRNPH2	5.79277	0.268919	6.92359e-09	4.60405e-08
0	BCAP29	5.78962	0.393296	7.05452e-09	4.68569e-08
0	MAT2B	5.78565	0.305729	7.22306e-09	4.79025e-08
0	PPIL6	5.77398	0.435675	7.74191e-09	5.12448e-08
0	NOL9	5.77235	0.316678	7.8173e-09	5.1704e-08
0	SMAD1	5.77206	0.330577	7.83101e-09	5.17748e-08
0	FAAP20	5.77176	0.248226	7.84498e-09	5.18473e-08
0	DHX29	5.76882	0.339832	7.98287e-09	5.26979e-08
0	WWC2	5.76412	0.412711	8.20843e-09	5.41455e-08
0	MED7	5.76396	0.517073	8.21612e-09	5.41755e-08
0	NT5C3A	5.76379	0.391708	8.22475e-09	5.42116e-08
0	FAM98B	5.76241	0.302801	8.2919e-09	5.46333e-08
0	KRR1	5.76195	0.318198	8.31462e-09	5.4762e-08
0	STK11	5.75852	0.326294	8.48536e-09	5.58438e-08
0	NUAK2	5.75798	0.269611	8.51289e-09	5.60036e-08
0	ZIC1	5.75639	0.302735	8.59309e-09	5.65096e-08
0	SLC36A4	5.75337	0.345264	8.74823e-09	5.74641e-08
0	C5orf34	5.75311	0.915252	8.76163e-09	5.75302e-08
0	KLHL8	5.74424	0.411834	9.23349e-09	6.05592e-08
0	ZNF106	5.74223	0.289991	9.34363e-09	6.12324e-08
0	USP47	5.74218	0.250746	9.3468e-09	6.12324e-08
0	RBM23	5.7403	0.29482	9.45079e-09	6.18666e-08
0	TET3	5.73924	0.364001	9.51018e-09	6.22317e-08
0	LRIF1	5.73898	0.379533	9.52481e-09	6.22903e-08
0	ANXA7	5.73895	0.366153	9.52637e-09	6.22903e-08
0	RFK	5.73812	0.492937	9.57306e-09	6.25719e-08
0	KCTD1	5.73742	0.458737	9.61308e-09	6.27858e-08
0	COL11A1	5.73076	0.256932	9.99819e-09	6.52515e-08
0	HADH	5.72993	0.315442	1.0047e-08	6.55206e-08
0	SMC5	5.7272	0.277101	1.02105e-08	6.65613e-08
0	ATF7IP2	5.72656	1.02128	1.02485e-08	6.67837e-08
0	PLEKHG1	5.71703	0.298754	1.084e-08	7.05318e-08
0	STT3B	5.71551	0.287383	1.09377e-08	7.11402e-08
0	RORB	5.71446	0.799573	1.10053e-08	7.15262e-08
0	TEX14	5.71383	1.23763	1.10464e-08	7.17464e-08
0	PPIB	5.70914	0.249145	1.13549e-08	7.3659e-08
0	RAF1	5.70778	0.26365	1.14459e-08	7.42216e-08
0	XRCC2	5.70448	0.238308	1.16701e-08	7.55619e-08
0	GTPBP6	5.70397	0.279334	1.17048e-08	7.57578e-08
0	FIS1	5.70046	0.246068	1.19487e-08	7.72492e-08
0	SLC16A1	5.69561	0.295945	1.22932e-08	7.94469e-08
0	UBE2F	5.6931	0.484065	1.24752e-08	8.05321e-08
0	CRISPLD1	5.69233	0.315688	1.25318e-08	8.08369e-08
0	MUTYH	5.69167	0.624607	1.25802e-08	8.11187e-08
0	PSMD1	5.68905	0.25865	1.27744e-08	8.23406e-08
0	KCNK10	5.68681	0.438401	1.29437e-08	8.33692e-08
0	HACD2	5.68419	0.562463	1.31434e-08	8.46238e-08
0	TP53BP2	5.68381	0.271574	1.31728e-08	8.47815e-08
0	G6PD	5.68279	0.342872	1.32514e-08	8.52557e-08
0	SSRP1	5.68168	0.271944	1.33374e-08	8.57769e-08
0	FAM20B	5.68151	0.32046	1.33514e-08	8.58346e-08
0	EIF2AK4	5.67694	0.27712	1.37129e-08	8.81256e-08
0	SAT2	5.67682	0.250155	1.37221e-08	8.81518e-08
0	ASH2L	5.67479	0.338015	1.38862e-08	8.91728e-08
0	ZNF407	5.67339	0.363124	1.4e-08	8.98702e-08
0	UBE2B	5.67292	0.25563	1.40382e-08	9.00821e-08
0	EXTL3	5.67078	0.288113	1.42152e-08	9.11839e-08
0	KDM4A	5.67067	0.283919	1.42237e-08	9.12045e-08
0	AHSA1	5.66964	0.250726	1.43102e-08	9.17247e-08
0	RBM22	5.66952	0.263621	1.43201e-08	9.17538e-08
0	LRRC8C	5.66843	0.609043	1.44112e-08	9.2269e-08
0	C1orf112	5.66782	0.474325	1.44624e-08	9.25623e-08
0	HNRNPF	5.66717	0.263125	1.45177e-08	9.2882e-08
0	VTI1B	5.66685	0.261113	1.45451e-08	9.30226e-08
0	TMEM230	5.66641	0.299364	1.45822e-08	9.32257e-08
0	ECSIT	5.66463	0.299899	1.47341e-08	9.41561e-08
0	STARD3NL	5.66458	0.246163	1.47387e-08	9.41561e-08
0	KLHDC9	5.66053	0.477547	1.50907e-08	9.63335e-08
0	COTL1	5.65678	0.28425	1.54242e-08	9.84259e-08
0	IQCK	5.65426	0.334586	1.56518e-08	9.98044e-08
0	CEP57	5.65365	0.245617	1.57075e-08	1.00085e-07
0	MAFB	5.65319	0.488201	1.57501e-08	1.00319e-07
0	UCK2	5.65145	0.307844	1.59095e-08	1.01298e-07
0	CIAPIN1	5.65112	0.349829	1.59406e-08	1.01458e-07
0	ZNF830	5.64882	0.387979	1.61553e-08	1.02749e-07
0	FLRT3	5.64861	0.359313	1.61753e-08	1.02837e-07
0	ACTR1A	5.6417	0.262282	1.68375e-08	1.0689e-07
0	TXN2	5.64142	0.25572	1.68652e-08	1.06987e-07
0	SF3A3	5.63791	0.258977	1.72131e-08	1.09113e-07
0	CENPQ	5.63758	0.595507	1.72456e-08	1.09279e-07
0	WDR77	5.63192	0.41653	1.78214e-08	1.12762e-07
0	PMEPA1	5.63144	0.579969	1.78711e-08	1.12994e-07
0	NDUFB8	5.6308	0.25074	1.79371e-08	1.13329e-07
0	SH3BGRL	5.6308	0.266337	1.79373e-08	1.13329e-07
0	GDF10	5.62853	1.02242	1.81749e-08	1.14787e-07
0	MAPK6	5.6283	0.246321	1.81996e-08	1.14901e-07
0	SDC2	5.62478	0.305684	1.85741e-08	1.1718e-07
0	RNF4	5.62035	0.286719	1.90574e-08	1.20185e-07
0	HEBP1	5.61841	0.337311	1.92724e-08	1.21496e-07
0	TRIM69	5.61324	1.54963	1.9857e-08	1.25136e-07
0	TENM4	5.61261	0.275188	1.99299e-08	1.2555e-07
0	EEF1E1	5.6117	0.458036	2.00348e-08	1.26164e-07
0	ROR2	5.61043	0.419747	2.01825e-08	1.27021e-07
0	ENOX2	5.61013	0.427967	2.02178e-08	1.27177e-07
0	USP46	5.60431	0.30438	2.09089e-08	1.31429e-07
0	LSM12	5.6039	0.410769	2.09587e-08	1.31693e-07
0	LYAR	5.59969	0.52147	2.14739e-08	1.34832e-07
0	TBL1XR1	5.59582	0.252428	2.19583e-08	1.37773e-07
0	IMPDH2	5.59501	0.224464	2.20605e-08	1.38364e-07
0	LAGE3	5.59138	0.280822	2.25275e-08	1.41234e-07
0	TMEM69	5.59132	0.375512	2.25345e-08	1.41234e-07
0	ZADH2	5.59059	0.360763	2.26302e-08	1.41783e-07
0	ARL6IP4	5.58855	0.253928	2.28979e-08	1.43407e-07
0	FAM135A	5.58495	0.346808	2.33772e-08	1.46144e-07
0	FANCB	5.58184	0.515391	2.37994e-08	1.48621e-07
0	UBE2E2	5.57828	0.299178	2.42904e-08	1.51523e-07
0	ZBTB8A	5.57553	0.390878	2.46776e-08	1.53826e-07
0	ARF6	5.57224	0.282971	2.51478e-08	1.56644e-07
0	PROSER3	5.56968	0.349068	2.5521e-08	1.58739e-07
0	TMEM263	5.56642	0.232039	2.60019e-08	1.61672e-07
0	SDK1	5.56036	0.338706	2.69216e-08	1.6727e-07
[truncated: 411,353+ more rows]

## Sheet: Cluster_0
Gene names	scores	logfoldchanges	pvals	pvals_adj
CENPF	58.2293	4.54298	0	0
PTTG1	56.8017	3.94329	0	0
CDC20	55.6816	4.67829	0	0
TOP2A	55.1964	4.43253	0	0
CCNB2	55.1581	4.01887	0	0
BIRC5	54.748	3.81729	0	0
TPX2	54.3139	4.03462	0	0
HMGB2	54.2697	3.2204	0	0
CCNB1	53.4611	4.07407	0	0
ARL6IP1	53.1543	3.12288	0	0
MKI67	51.0532	3.73098	0	0
NUSAP1	50.6586	3.46049	0	0
DLGAP5	50.4767	3.94903	0	0
UBE2C	50.0054	4.12986	0	0
NUCKS1	49.5601	1.76316	0	0
ASPM	49.3571	3.93198	0	0
CKS1B	49.0603	2.87682	0	0
KPNA2	47.5263	3.02439	0	0
CKS2	47.0434	2.88533	0	0
TACC3	46.7218	3.36239	0	0
CDCA8	46.4616	3.792	0	0
NUF2	45.7934	3.60531	0	0
ECT2	45.6306	3.04093	0	0
KIF2C	45.569	3.59558	0	0
PRR11	45.4288	3.45093	0	0
PLK1	45.3363	3.75395	0	0
HMMR	45.3023	3.77363	0	0
AURKB	44.6631	3.30329	0	0
TUBB4B	44.5987	2.5634	0	0
GTSE1	44.1772	3.58635	0	0
KIF4A	44.1707	3.38356	0	0
NEK2	44.1273	4.18434	0	0
MAD2L1	43.684	2.80641	0	0
BUB1	43.3133	3.55865	0	0
RAD21	43.2187	2.02108	0	0
SMC4	42.9055	2.44919	0	0
NCAPD2	42.5649	2.6271	0	0
SGO2	42.4839	3.44867	0	0
H2AFX	42.3254	2.35486	0	0
CENPE	42.2007	3.47327	0	0
PSRC1	41.8705	3.46166	0	0
CCNA2	41.5286	3.08987	0	0
KIFC1	41.3617	3.07878	0	0
TROAP	41.1631	3.39668	0	0
KIF11	41.0399	2.96668	0	0
PRC1	41.0314	3.09636	0	0
CKAP2	40.3741	2.28489	0	0
CKAP5	40.1556	1.95202	0	0
ANP32E	39.7955	1.78282	0	0
H2AFZ	39.5899	1.92498	0	0

## Sheet: Cluster_1
Gene names	scores	logfoldchanges	pvals	pvals_adj
TACC3	44.0801	4.55771	0	0
AURKB	43.4879	4.7094	0	0
KIFC1	43.366	4.52093	0	0
PLK1	43.3044	5.07341	0	0
PIF1	43.259	5.77415	0	0
CCNB2	43.1321	4.47288	0	0
NUSAP1	43.0243	4.11363	0	0
TPX2	42.8899	4.53916	0	0
BUB1	42.8816	4.87133	0	0
DLGAP5	42.8262	4.58713	0	0
TOP2A	42.7796	4.82339	0	0
CCNB1	42.777	4.57751	0	0
INCENP	42.7668	4.32321	0	0
CDK1	42.7293	4.60137	0	0
TROAP	42.6844	4.72578	0	0
KIF2C	42.4782	4.30835	0	0
PSRC1	42.4234	4.52738	0	0
KIF23	42.3889	4.28385	0	0
KIF20A	42.334	5.11288	0	0
MKI67	42.2662	4.49376	0	0
UBE2C	42.2547	4.47684	0	0
HJURP	42.148	4.42152	0	0
SPAG5	42.1321	3.94547	0	0
KIF22	42.0468	3.37669	0	0
NCAPD2	42.0328	3.52245	0	0
CCNA2	42.0322	4.31374	0	0
ECT2	41.9122	3.80249	0	0
CDC20	41.8453	4.59871	0	0
CDCA2	41.7722	4.30327	0	0
ANLN	41.7705	4.0626	0	0
SGO2	41.5829	4.3963	0	0
H2AFX	41.5295	3.32515	0	0
CIT	41.4805	3.92325	0	0
DEPDC1B	41.438	3.87781	0	0
HMGB2	41.4253	3.39105	0	0
ASPM	41.372	4.39413	0	0
CKAP5	41.3557	2.7592	0	0
KIF14	41.2987	4.21696	0	0
PTTG1	41.2496	3.91379	0	0
FAM83D	41.1656	4.63634	0	0
BIRC5	41.1078	3.88932	0	0
BUB1B	41.042	3.99015	0	0
CKAP2L	41.0401	4.28151	0	0
CDCA8	40.8991	4.24461	0	0
KPNA2	40.8046	3.58432	0	0
NCAPG	40.7573	3.94191	0	0
ARHGAP11A	40.7219	4.12651	0	0
TTK	40.6704	4.28516	0	0
CENPA	40.4633	4.41189	0	0
KNSTRN	40.4205	3.66022	0	0

## Sheet: Cluster_2
Gene names	scores	logfoldchanges	pvals	pvals_adj
PCLAF	49.3462	3.53668	0	0
H2AFZ	48.5773	2.35048	0	0
DEK	47.0392	2.56058	0	0
TUBB	45.5877	1.826	0	0
HIST1H4C	45.4193	3.93969	0	0
NASP	43.139	3.2209	0	0
ATAD2	42.4972	2.84489	0	0
TUBA1B	41.9912	3.88006	0	0
CLSPN	41.4089	2.8634	0	0
PPIA	40.8915	2.25633	0	0
SNRPE	39.417	1.77403	0	0
HSP90AA1	38.3749	1.57017	0	0
NUCKS1	38.3162	1.29708	0	0
YBX1	38.2402	1.44411	0	0
H3F3A	38.0894	1.37247	0	0
GINS2	38.0822	2.13823	0	0
TYMS	37.786	2.1931	0	0
BRIP1	37.5601	2.91323	0	9.21185e-306
H2AFY	37.5025	1.72036	8.39141e-308	7.60659e-305
GSTP1	37.4106	1.37478	2.62556e-306	2.261e-303
HINT1	36.8985	1.72659	4.87534e-298	3.99847e-295
MIF	36.8302	1.48037	6.0585e-297	4.74298e-294
AP2S1	36.487	1.82656	1.7799e-291	1.33283e-288
TMA7	36.4796	1.9846	2.3319e-291	1.67343e-288
PXMP2	36.096	1.97199	2.61673e-285	1.80272e-282
XRCC5	36.0091	1.60829	6.02594e-284	3.99172e-281
PTGES3	35.8668	2.66789	1.00693e-281	6.4231e-279
SUMO2	35.8399	1.49107	2.63748e-281	1.62233e-278
EEF1B2	35.8229	1.73659	4.8663e-281	2.89008e-278
SNRPG	35.7424	1.97588	8.69013e-280	4.989e-277
RRM2	35.4427	2.7131	3.75524e-275	2.08634e-272
PRKDC	35.414	1.31152	1.03914e-274	5.59285e-272
NCL	35.1886	1.47588	2.98996e-271	1.56049e-268
WWOX	35.0229	1.75705	1.00675e-268	5.09978e-266
SRSF10	34.9902	2.28917	3.17074e-268	1.56028e-265
SET	34.9018	1.26089	6.98039e-267	3.33954e-264
DUT	34.8073	2.02128	1.88528e-265	8.77575e-263
RBBP4	34.8015	2.38249	2.30651e-265	1.0454e-262
CENPK	34.8	2.78828	2.43241e-265	1.07419e-262
PCNA	34.4835	2.01289	1.41833e-260	6.10696e-258
RFC3	34.4349	2.28303	7.57868e-260	3.1836e-257
HSPD1	34.371	1.43724	6.84579e-259	2.80726e-256
HES1	34.1738	2.12122	5.91777e-256	2.33798e-253
BRCA1	34.1736	2.46672	5.9729e-256	2.33798e-253
SNRPB	34.0931	1.49463	9.32962e-255	3.57076e-252
CHCHD2	34.0745	1.75246	1.7633e-254	6.60202e-252
CALM1	34.0637	2.05528	2.54261e-254	9.31731e-252
HMGA1	34.0213	2.42304	1.08001e-253	3.87519e-251
TMBIM6	33.9501	2.15291	1.21713e-252	4.27807e-250
FTH1	33.9312	1.36501	2.31273e-252	7.96642e-250

## Sheet: Cluster_3
Gene names	scores	logfoldchanges	pvals	pvals_adj
POU3F2	37.28	2.70767	3.46187e-304	5.96238e-300
NR2F1	35.8288	2.0945	3.93887e-281	2.2613e-277
IGDCC3	34.6891	1.8871	1.1484e-263	4.94471e-260
DTX4	33.1476	2.26634	6.12631e-241	2.11027e-237
CRABP1	32.0837	2.77857	7.44218e-226	2.13628e-222
GREB1	31.7968	1.9986	7.1699e-222	1.7641e-218
VIM	31.6113	1.31826	2.5862e-219	5.56776e-216
PIK3C2B	29.9436	1.82123	5.32257e-197	1.01856e-193
JAG1	28.9977	2.22096	7.03532e-185	1.21169e-181
SPRY2	27.6087	2.19861	8.75031e-168	1.25589e-164
IGFBP2	27.3703	1.16752	6.19338e-165	8.20527e-162
MARCKSL1	27.0357	0.79715	5.62716e-161	6.92261e-158
CCND2	26.4868	1.38269	1.37641e-154	1.5804e-151
ZFP36L1	26.3489	1.2713	5.27995e-153	5.68354e-150
BOC	26.1865	1.49847	3.78377e-151	3.83341e-148
FGFBP3	26.0298	2.06753	2.27786e-149	2.17953e-146
SLC16A1	25.9578	1.51087	1.48559e-148	1.34665e-145
ZEB2	25.703	1.48981	1.08186e-145	9.11783e-143
NES	25.7019	1.25096	1.11174e-145	9.11783e-143
PCDH18	25.6664	2.59205	2.7743e-145	2.17189e-142
SFRP2	25.4588	2.07055	5.63627e-143	4.22059e-140
COTL1	25.3466	1.61928	9.80338e-142	7.03515e-139
CD24	25.3144	1.40565	2.21643e-141	1.52695e-138
NRARP	25.1129	1.66103	3.5988e-139	2.38393e-136
IGFBPL1	24.7696	1.86985	1.90831e-135	1.21729e-132
PRTG	24.0943	1.33495	2.87111e-128	1.76604e-125
ILDR2	23.8333	1.62928	1.51005e-125	8.96815e-123
PDPN	23.6877	2.18985	4.83138e-124	2.68422e-121
SLC2A1	23.1882	1.49751	5.98516e-119	3.12371e-116
CNTFR	23.1468	1.26734	1.56539e-118	7.92963e-116
VANGL2	23.0197	1.0659	2.9619e-117	1.45751e-114
TSPAN18	22.7533	1.29214	1.33111e-114	6.19615e-112
SCD	22.6465	1.21559	1.51184e-113	6.8522e-111
RND2	22.5585	1.66423	1.10907e-112	4.89784e-110
CSPG5	22.2208	2.20972	2.16195e-109	9.30883e-107
GLUL	21.9974	1.01125	3.0482e-107	1.28047e-104
DPYSL2	21.8405	0.984129	9.57328e-106	3.92573e-103
MGST1	21.3696	1.85867	2.56063e-101	9.80039e-99
PBX1	21.2966	0.955503	1.22108e-100	4.47462e-98
MEIS1	21.2871	1.59761	1.49489e-100	5.36385e-98
PLXNA2	21.1139	2.26835	5.92305e-99	2.08189e-96
IGF2BP1	21.0929	0.975388	9.24121e-99	3.18323e-96
TEAD2	20.903	1.08293	5.02631e-97	1.69741e-94
C1orf198	20.7531	1.34906	1.15025e-95	3.80977e-93
HES5	20.6491	1.3444	9.93918e-95	3.11241e-92
SEMA6B	20.2576	1.34049	3.04203e-91	9.19173e-89
ITM2C	20.2239	1.09204	6.02963e-91	1.79049e-88
SALL2	20.2064	1.12456	8.60331e-91	2.51144e-88
FBN2	20.1811	1.58822	1.434e-90	4.11629e-88
IRX5	20.1005	3.71246	7.30368e-90	2.02889e-87

## Sheet: Cluster_4
Gene names	scores	logfoldchanges	pvals	pvals_adj
FOXG1	65.4279	3.30556	0	0
FZD8	65.0729	3.17279	0	0
SFRP1	64.3236	2.64838	0	0
EFNB1	63.3625	2.25942	0	0
PTPRZ1	62.7604	2.36121	0	0
SHISA2	61.573	3.15164	0	0
FRZB	60.3864	3.16499	0	0
SYNE2	58.9938	1.67436	0	0
DLK1	58.879	3.78295	0	0
SALL4	58.26	2.40082	0	0
SCUBE1	58.1305	2.44765	0	0
GLI3	57.5251	1.63445	0	0
NOTCH1	57.4232	2.08669	0	0
SALL2	56.7481	1.88155	0	0
FABP7	55.4345	2.34936	0	0
NR2E1	55.068	2.8209	0	0
SOX9	55.0351	2.04905	0	0
LHX2	54.5146	2.09763	0	0
MOB3B	54.4678	2.10641	0	0
VEPH1	54.3647	2.40194	0	0
FUT9	53.8979	2.27743	0	0
POU3F3	53.7918	1.93279	0	0
NEK6	53.4398	2.04646	0	0
FZD2	53.3449	1.72496	0	0
PCDH19	53.2769	2.54529	0	0
FZD5	52.2979	2.75718	0	0
RGMA	52.0766	1.8991	0	0
CAPN6	50.3531	2.98308	0	0
SOX1	50.2742	1.8407	0	0
GPC1	49.9995	1.7261	0	0
BCAT1	49.849	1.85176	0	0
NAV1	49.5929	1.81142	0	0
AIF1L	49.3421	1.88539	0	0
MEIS2	49.3117	1.98333	0	0
OGT	49.288	1.54801	0	0
FGFBP3	49.0988	1.9724	0	0
BLACAT1	48.4634	2.29596	0	0
NAALAD2	47.9289	1.89464	0	0
MPPED1	47.9092	2.27303	0	0
ABCC4	47.7372	1.95647	0	0
PRSS23	47.411	1.94591	0	0
MAPKAPK3	47.4034	1.73881	0	0
COL4A2	47.2812	1.6743	0	0
TRIM24	47.0527	1.26056	0	0
NECTIN3	46.697	1.65197	0	0
TRIB2	46.5034	1.69187	0	0
STK26	46.2973	1.80222	0	0
CD82	45.5971	2.00219	0	0
FSTL1	45.5254	1.63752	0	0
COL2A1	45.4373	1.62699	0	0

## Sheet: Cluster_5
Gene names	scores	logfoldchanges	pvals	pvals_adj
TAGLN3	46.0812	3.90355	0	0
MAP1B	42.5692	1.87258	0	0
DCC	41.6373	3.34613	0	0
BASP1	40.8657	2.14926	0	0
ELAVL3	40.8453	3.44898	0	0
STMN2	40.7144	4.47772	0	0
ELAVL4	40.5221	3.48868	0	0
TUBA1A	40.1104	2.9429	0	0
KALRN	40.0384	2.73329	0	0
DCX	39.7255	2.46713	0	0
MAP2	39.3503	2.00948	0	0
STMN1	39.1042	2.02021	0	0
TMSB10	39.0675	2.05839	0	0
MLLT11	39.0578	2.4965	0	0
KIF5C	37.1084	2.27824	2.05752e-301	2.36244e-298
SOX4	36.2697	1.95879	4.86749e-288	5.23955e-285
EBF2	34.6652	5.4392	2.64019e-263	2.67482e-260
CACNA2D1	34.4504	3.38275	4.43947e-260	4.24783e-257
NCAM1	34.3813	2.26603	4.8068e-259	4.35724e-256
AKAP6	33.8211	3.40246	9.64858e-251	7.91321e-248
TUBB2B	33.686	1.36213	9.25565e-249	7.24591e-246
RTN4	33.5421	1.55211	1.17517e-246	8.43332e-244
ELAVL2	33.5268	2.51951	1.95904e-246	1.34962e-243
SCG3	33.3544	3.55453	6.28771e-244	4.16512e-241
NHLH1	33.2769	4.73875	8.346e-243	5.32382e-240
EBF3	33.2697	4.68084	1.05937e-242	6.51629e-240
LHX9	33.1597	5.03923	4.1076e-241	2.43949e-238
IGFBPL1	33.1091	2.7201	2.19897e-240	1.26243e-237
CALM1	32.6344	2.46194	1.3335e-233	7.17717e-231
INSM1	32.3912	3.72857	3.65126e-230	1.90563e-227
DLL3	32.077	4.10675	9.24381e-226	4.68253e-223
INA	31.9279	2.98437	1.09672e-223	5.39679e-221
RTN1	31.6706	2.59245	3.94438e-220	1.88706e-217
NFASC	31.0999	3.36727	2.41794e-212	1.12552e-209
MAP4K4	30.6912	1.55505	7.4637e-207	3.29609e-204
ACTG1	30.2893	1.00127	1.58729e-201	6.83446e-199
GAP43	30.2335	2.73727	8.59149e-201	3.60905e-198
NRXN1	30.1063	3.29789	4.00244e-199	1.64129e-196
TUBB2A	30.0061	1.99695	8.16433e-198	3.2701e-195
SRRM4	29.9456	3.84184	5.02155e-197	1.96559e-194
ACTB	29.7642	1.00151	1.13572e-194	4.34678e-192
CRMP1	29.3695	1.75312	1.34584e-189	5.03902e-187
JPT1	29.0406	1.90241	2.02141e-185	7.40738e-183
CTNNA2	28.6038	2.32068	6.03217e-180	2.16442e-177
NRN1	28.5605	2.22694	2.08078e-179	7.31374e-177
ENC1	28.5136	2.50322	7.94097e-179	2.73535e-176
BEX1	27.7499	1.61427	1.74607e-169	5.56899e-167
RERE	27.6889	1.03188	9.50976e-169	2.97794e-166
GABRB3	27.629	2.44625	4.99591e-168	1.53651e-165
H3F3A	27.6075	1.17004	9.05252e-168	2.73529e-165

## Sheet: Cluster_6
Gene names	scores	logfoldchanges	pvals	pvals_adj
LRP1B	18.9865	2.05046	2.20475e-80	7.59448e-77
RSPO2	17.9642	1.82967	3.71274e-72	7.10494e-69
SLIT3	17.6675	1.71921	7.46078e-70	1.16815e-66
CACHD1	17.6212	1.28275	1.69474e-69	2.43238e-66
WLS	17.4284	1.58673	5.02294e-68	6.65462e-65
TSHZ2	17.3315	1.63324	2.72036e-67	3.34662e-64
ERBB4	17.0828	2.01054	1.99412e-65	2.14654e-62
ADAMTS18	16.7134	2.48683	1.04766e-62	9.49672e-60
ADGRL3	16.4883	1.33566	4.45068e-61	3.19392e-58
SAMD5	16.3618	1.43553	3.58091e-60	2.37208e-57
DMD	16.3571	1.42601	3.87123e-60	2.46942e-57
NFIA	16.1194	1.52151	1.86462e-58	1.10739e-55
SLIT2	15.7215	1.52902	1.07695e-55	5.45538e-53
RBFOX1	15.2303	2.00949	2.22659e-52	8.15928e-50
NRG3	15.1793	1.8745	4.85009e-52	1.70476e-49
PLXDC2	15.0889	1.56122	1.91661e-51	6.22826e-49
TRPM3	14.9932	1.51513	8.13306e-51	2.45747e-48
DACH1	14.7709	1.06295	2.2556e-49	6.07004e-47
CNTNAP3	14.7396	1.63239	3.59027e-49	9.51312e-47
IL1RAPL1	14.668	1.70286	1.03271e-48	2.61564e-46
EIF4G3	14.566	0.58228	4.62018e-48	1.12075e-45
ANKUB1	14.4806	1.68179	1.60612e-47	3.6883e-45
TPBG	14.4333	1.34141	3.19248e-47	7.14079e-45
TENM3	14.4067	1.17098	4.69465e-47	1.03662e-44
TENM2	14.3794	1.6211	6.9649e-47	1.48094e-44
PLCB1	14.2708	1.53406	3.32801e-46	6.58832e-44
NLGN1	14.232	1.70236	5.80199e-46	1.08617e-43
OLFM3	14.2061	1.61708	8.40135e-46	1.53932e-43
BCL2	14.1917	1.26217	1.03085e-45	1.84941e-43
MACROD2	14.187	1.65838	1.1028e-45	1.9581e-43
MDGA2	14.0916	1.64103	4.27654e-45	7.36549e-43
GLIS3	14.0858	1.70184	4.64204e-45	7.91583e-43
ZNF37A	14.0582	1.60249	6.85772e-45	1.11425e-42
PLEKHA5	14.0494	1.04993	7.77089e-45	1.25082e-42
DPP10	14.0485	1.6528	7.87276e-45	1.25549e-42
PRTG	14.0435	0.938734	8.43809e-45	1.32118e-42
SOX6	13.8952	1.3581	6.76931e-44	1.01381e-41
CUX2	13.8693	1.45064	9.7265e-44	1.43179e-41
EXT1	13.8335	0.963818	1.60024e-43	2.31217e-41
TENM4	13.8069	0.934886	2.31459e-43	3.26756e-41
RORA	13.7346	1.51356	6.30009e-43	8.28293e-41
CLVS1	13.7101	1.58686	8.8393e-43	1.13611e-40
TAF3	13.6808	1.55924	1.32186e-42	1.674e-40
PTPRM	13.6327	1.39702	2.55997e-42	3.21827e-40
SH3D19	13.5719	1.3891	5.87712e-42	7.23012e-40
CS	13.5392	1.64333	9.17313e-42	1.09714e-39
LSAMP	13.5086	0.908654	1.39156e-41	1.65289e-39
LMX1A	13.481	1.1778	2.02462e-41	2.35609e-39
FGFR2	13.4486	1.0925	3.13864e-41	3.53312e-39
RFX4	13.4105	1.19692	5.25017e-41	5.75947e-39

## Sheet: Cluster_7
Gene names	scores	logfoldchanges	pvals	pvals_adj
YBX1	28.4619	1.40534	3.46897e-178	5.97461e-174
MIF	28.0484	1.49574	4.17897e-173	2.77043e-169
PPIA	28.0433	2.00152	4.8257e-173	2.77043e-169
H2AFZ	27.7814	1.74574	7.27069e-170	3.13058e-166
GSTP1	27.6979	1.34079	7.39135e-169	2.54603e-165
NASP	27.5892	2.55034	1.49905e-167	4.30303e-164
H3F3A	26.8394	1.26511	1.12091e-158	2.75792e-155
UBA52	26.6897	1.31276	6.20281e-157	1.33539e-153
NME2	26.4076	1.58923	1.12064e-153	2.14454e-150
TMA7	25.8546	1.82565	2.15825e-147	3.71715e-144
TUBA1B	25.8351	3.02624	3.5804e-147	5.60593e-144
HINT1	25.8149	1.59827	6.03847e-147	8.66671e-144
SERF2	25.6936	1.68377	1.37793e-145	1.82555e-142
SNRPE	25.6775	1.52689	2.08791e-145	2.56857e-142
EEF1B2	25.4888	1.65214	2.62337e-143	3.01215e-140
BTF3	25.3208	2.40169	1.88591e-141	2.03006e-138
EEF1G	25.232	1.07602	1.78439e-140	1.8078e-137
DEK	25.0629	1.76371	1.2615e-138	1.20705e-135
FTH1	25.0344	1.31725	2.58422e-138	2.34253e-135
RACK1	25.028	1.33496	3.0279e-138	2.60747e-135
SNRPG	24.9782	1.775	1.0537e-137	8.64188e-135
UBL5	24.8739	1.66985	1.42614e-136	1.11648e-133
HSP90AA1	24.7886	1.33768	1.1893e-135	8.90581e-133
PEBP1	24.495	1.32093	1.66795e-132	1.17273e-129
HMGA1	24.4942	2.21422	1.70227e-132	1.17273e-129
SNRPD2	24.3681	1.35355	3.7307e-131	2.4713e-128
ATP5ME	24.2758	1.77334	3.53148e-130	2.25269e-127
CFL1	24.233	0.964374	9.98066e-130	6.13918e-127
SNRPD1	24.1647	1.61397	5.23623e-129	3.10978e-126
FTL	24.0318	1.51419	1.29353e-127	7.42618e-125
UQCRH	23.9198	1.50163	1.90823e-126	1.06018e-123
ATP5F1E	23.8479	1.40692	1.06353e-125	5.7241e-123
DYNLL1	23.8441	1.76208	1.16497e-125	6.08008e-123
SUMO2	23.8164	1.30942	2.25801e-125	1.14381e-122
CALM1	23.668	1.83537	7.71164e-124	3.79479e-121
GNAI2	23.6168	1.51238	2.59046e-123	1.23932e-120
COX4I1	23.5814	1.44604	5.98465e-123	2.78577e-120
TMSB10	23.4961	1.20049	4.47523e-122	2.02834e-119
HSPE1	23.4521	1.44689	1.2595e-121	5.56214e-119
GNG5	23.4229	1.76896	2.49764e-121	1.07542e-118
SNRPB	23.3585	1.35912	1.12961e-120	4.74518e-118
TUBA1A	23.3365	1.7108	1.89013e-120	7.75089e-118
SET	23.3131	1.11877	3.26828e-120	1.28691e-117
HSPD1	23.3128	1.26869	3.28769e-120	1.28691e-117
SRSF9	23.3108	1.26905	3.44697e-120	1.31927e-117
ERH	23.3047	1.243	3.97588e-120	1.48862e-117
TUBB	23.2402	1.27352	1.78633e-119	6.54596e-117
HIST1H4C	23.0603	2.27635	1.15991e-117	4.1619e-115
OST4	22.9876	1.61478	6.19952e-117	2.17907e-114
NDUFS5	22.9231	1.29285	2.73452e-116	9.41932e-114

## Sheet: Cluster_8
Gene names	scores	logfoldchanges	pvals	pvals_adj
SLIT2	62.1543	3.19458	0	0
EIF3E	61.7193	2.49303	0	0
BTF3	59.5883	3.36897	0	0
HES1	59.5696	2.86891	0	0
PLEKHA5	59.33	2.39124	0	0
TSHZ2	59.1355	3.02339	0	0
NRG3	58.7515	3.63759	0	0
RACK1	58.5268	1.69413	0	0
DACH1	58.1922	2.34898	0	0
PRKG1	58.1637	3.03689	0	0
SYT1	58.0417	3.02143	0	0
PLCB1	57.8903	2.98974	0	0
PLXDC2	56.9122	2.93462	0	0
H3F3B	56.7131	2.8091	0	0
CACHD1	56.4651	2.2326	0	0
DMD	56.0603	2.55757	0	0
LSAMP	55.9193	2.12115	0	0
FBXL7	55.7855	2.78817	0	0
BEX2	55.6941	2.84681	0	0
H3F3A	55.5933	1.50213	0	0
FTH1	55.2682	1.67532	0	0
SERF2	55.1142	2.10961	0	0
HINT1	54.8863	1.9465	0	0
ADGRL3	54.715	2.36917	0	0
C1orf61	54.6831	2.93622	0	0
HSP90AB1	54.5638	1.34821	0	0
COL4A6	54.2907	2.02757	0	0
PPIA	54.1717	2.22694	0	0
YBX1	53.4624	1.47865	0	0
ATP5ME	53.3701	2.33341	0	0
TMA7	53.3462	2.25821	0	0
FTL	53.2551	1.94497	0	0
PAK3	53.2358	2.23267	0	0
WNT5B	52.792	2.29691	0	0
PFDN5	52.6725	1.87316	0	0
HDAC9	52.0409	2.6638	0	0
RSPO2	51.6946	3.01524	0	0
UBL5	51.6785	2.09411	0	0
FHL1	51.4814	2.73556	0	0
UBA52	51.4381	1.41039	0	0
NASP	51.3032	2.83444	0	0
NCL	51.2808	1.57564	0	0
ATP5F1E	51.1011	1.74851	0	0
BEX3	51.0875	1.1946	0	0
MORF4L1	50.9049	1.80892	0	0
AUTS2	50.8161	2.04114	0	0
TUBA1A	50.777	2.11295	0	0
RSPO3	50.7474	2.77493	0	0
EMX2	50.2972	1.82696	0	0
COX4I1	50.2767	1.75494	0	0

[truncated: 15 more sheets: Cluster_9, Cluster_10, Cluster_11, Cluster_12, Cluster_13, Cluster_14, Cluster_15, Cluster_16, Cluster_17, Cluster_18, Cluster_19, Cluster_20, Cluster_21, Cluster_22, Cluster_23]
