# Supplementary material for: CCB79 is a primate-specific cilium initiation factor essential to maintain neural progenitor diversity in developing brain tissue
Source: Research Square preprint supplement (doi:10.21203/rs.3.rs-7309668/v1), 2025-10-07
Supplement: Supplementary file 2 [file 9e30df56e9b0d450a4b56f91.xlsx]

## Sheet: DE_IPC_Vs_NPC_Up
Gene	p_val	avg_log2FC	pct.1	pct.2	p_val_adj	ALIAS	ENTREZID
CELF3	0	352484004487714	0.987	0.206	0	CELF3	11189	CUGBP Elav-like family member 3
NSG2	0	331749503541391	0.931	0.029	0	NSG2	51617	neuronal vesicle trafficking associated 2
ACTL6B	0	147866591104136	0.848	0.005	0	ACTL6B	51412	actin like 6B
NEFM	0	32856143746348	0.918	0.083	0	NEFM	4741	neurofilament medium chain
STMN2	0	435704981068057	0.993	0.156	0	STMN2	11075	stathmin 2
INA	0	335143667080672	0.961	0.146	0	INA	9118	internexin neuronal intermediate filament protein alpha
SVOP	0	129690856818091	0.814	0.005	0	SVOP	55530	SV2 related protein
AKAP6	0	263885650707811	0.913	0.091	0	AKAP6	9472	A-kinase anchoring protein 6
SCG3	0	196975063079872	0.903	0.057	0	SCG3	6445	sarcoglycan gamma
RUNDC3A	0	19182166420168	0.924	0.077	0	RUNDC3A	10900	RUN domain containing 3A
SYT4	0	181223308979372	0.792	0.005	0	SYT4	6860	synaptotagmin 4
SYT5	0	192818490208328	0.9	0.038	0	SYT5	6861	synaptotagmin 5
CHGB	0	199894343153009	0.857	0.024	0	CHGB	1114	chromogranin B
XKR7	0	149602488363021	0.842	0.007	0	XKR7	343702	XK related 7
SYP	0	267793203766295	0.937	0.118	0	SYP	6855	synaptophysin
L1CAM	7.96846e-292	277326313340273	0.955	0.149	1.25272e-288	L1CAM	3897	L1 cell adhesion molecule
NRXN1	5.09152e-291	278105627997495	0.946	0.137	8.00438e-287	NRXN1	9378	neurexin 1
ATP1A3	1.32374e-289	243926864742089	0.955	0.158	2.08105e-285	ATP1A3	478	ATPase Na+/K+ transporting subunit alpha 3
NFASC	1.9197e-289	215077942181197	0.881	0.07	3.01796e-286	NFASC	23114	neurofascin
PTPRN	9.27852e-289	14610995947795	0.775	0.005	1.45868e-284	PTPRN	5798	protein tyrosine phosphatase receptor type N
PTPRN2	5.27795e-287	178781163415137	0.883	0.07	8.29746e-283	PTPRN2	5799	protein tyrosine phosphatase receptor type N2
CHGA	4.6955e-282	146896824970437	0.76	0.005	7.3818e-278	CHGA	1113	chromogranin A
ATCAY	1.88702e-274	185908455817798	0.898	0.102	2.96658e-270	ATCAY	85300	ATCAY kinesin light chain interacting caytaxin
NMNAT2	6.08063e-272	165726885907794	0.872	0.079	9.55936e-269	NMNAT2	23057	nicotinamide nucleotide adenylyltransferase 2
CELF4	5.62877e-271	125904260756054	0.734	0.004	8.84899e-267	CELF4	56853	CUGBP Elav-like family member 4
SNAP25	1.22822e-269	157568142272152	0.835	0.057	1.93089e-265	SNAP25	6616	synaptosome associated protein 25
SCN3B	4.22107e-268	174138492219083	0.823	0.053	6.63594e-264	SCN3B	55800	sodium voltage-gated channel beta subunit 3
LHX5	7.65081e-263	182053250125066	0.87	0.091	1.20278e-258	LHX5	64211	LIM homeobox 5
RELN	6.84946e-260	348639770622091	0.721	0.009	1.0768e-255	RELN	5649	reelin
SLC17A6	1.26277e-259	187047431438075	0.712	0.005	1.9852e-255	SLC17A6	57084	solute carrier family 17 member 6
XKR4	6.72816e-260	137051196987565	0.764	0.028	1.05773e-255	XKR4	114786	XK related 4
INSM2	2.95906e-257	2135192574108	0.716	0.009	4.65194e-253	INSM2	84684	INSM transcriptional repressor 2
OLFM1	4.34106e-257	205712783535738	0.888	0.127	6.82459e-253	OLFM1	10439	olfactomedin 1
GAP43	2.21726e-256	288929152847808	0.942	0.228	3.48575e-252	GAP43	2596	growth associated protein 43
SEZ6L	3.32838e-255	150121506264041	0.708	0.007	5.23255e-251	SEZ6L	23544	seizure related 6 homolog like
DCC	4.19597e-253	326539275504769	0.991	0.398	6.59649e-249	DCC	1630	DCC netrin 1 receptor
SCN2A	5.57483e-252	152810413046212	0.712	0.012	8.76419e-248	SCN2A	6326	sodium voltage-gated channel alpha subunit 2
ELAVL4	5.60174e-252	23372926020761	0.939	0.215	8.8065e-248	ELAVL4	1996	ELAV like RNA binding protein 4
UNC13A	4.33511e-250	110539676609122	0.771	0.037	6.81523e-246	UNC13A	23025	unc-13 homolog A
ONECUT2	1.70592e-250	229435455533453	0.9	0.154	2.68188e-245	ONECUT2	9480	one cut homeobox 2
MAPT	5.24895e-249	243556605479958	0.939	0.222	8.25188e-245	MAPT	4137	microtubule associated protein tau
TLCD3B	2.30402e-248	231818847387123	0.918	0.191	3.62215e-244	TLCD3B	83723	TLC domain containing 3B
ELAVL3	3.46224e-246	245819848038155	0.976	0.352	5.44298e-243	ELAVL3	1995	ELAV like RNA binding protein 3
SEZ6L2	1.11807e-246	19736448228524	0.92	0.184	1.75772e-241	SEZ6L2	26470	seizure related 6 homolog like 2
PCSK1N	5.28775e-244	202400734310495	0.842	0.101	8.31287e-240	PCSK1N	27344	proprotein convertase subtilisin/kexin type 1 inhibitor
GABRB3	1.55761e-243	176615447522109	0.883	0.146	2.44872e-239	GABRB3	2562	gamma-aminobutyric acid type A receptor subunit beta3
KIF21B	4.18214e-243	176126896030271	0.948	0.253	6.57475e-239	KIF21B	23046	kinesin family member 21B
TTC9B	1.38479e-242	11724073267672	0.695	0.012	2.17703e-238	TTC9B	148014	tetratricopeptide repeat domain 9B
ONECUT1	5.42948e-242	178395772024664	0.866	0.119	8.53568e-238	ONECUT1	3175	one cut homeobox 1
CCSER1	3.01318e-240	270985322510608	0.898	0.169	4.73703e-236	CCSER1	401145	coiled-coil serine rich protein 1
BICDL1	7.12587e-240	105751549387866	0.747	0.035	1.12026e-235	BICDL1	92558	BICD family like cargo adaptor 1
MANEAL	1.78507e-239	146797125966944	0.822	0.082	2.8063e-235	MANEAL	149175	mannosidase endo-alpha like
CADPS	1.49785e-237	214373346175304	0.957	0.316	2.35478e-233	CADPS	8618	calcium dependent secretion activator
SLIT1	1.16469e-237	178497153866668	0.727	0.032	1.83102e-233	SLIT1	6585	slit guidance ligand 1
AP3B2	3.20724e-237	131521078047662	0.84	0.096	5.0421e-232	AP3B2	8120	adaptor related protein complex 3 subunit beta 2
FBXL16	3.67588e-236	107869514955061	0.794	0.062	5.77886e-232	FBXL16	146330	F-box and leucine rich repeat protein 16
CACNA1B	1.57612e-234	112692756510833	0.803	0.07	2.47781e-231	CACNA1B	774	calcium voltage-gated channel subunit alpha1 B
MMP24	2.13474e-232	104963678091482	0.686	0.016	3.35603e-228	MMP24	10893	matrix metallopeptidase 24
GRIA2	1.60595e-231	234378439645134	0.784	0.066	2.52472e-227	GRIA2	2891	glutamate ionotropic receptor AMPA type subunit 2
LHX9	4.80545e-231	161057142917271	0.667	0.012	7.55465e-228	LHX9	56956	LIM homeobox 9
CPLX2	1.44036e-229	111839765546232	0.66	0.009	2.26439e-225	CPLX2	10814	complexin 2
SCRT1	1.89675e-229	105197416524547	0.699	0.023	2.98189e-225	SCRT1	83482	scratch family transcriptional repressor 1
ADCYAP1	3.82138e-229	141218618931098	0.638	0.002	6.00759e-225	ADCYAP1	116	adenylate cyclase activating polypeptide 1
SYT7	3.89798e-229	13812702568221	0.807	0.085	6.12802e-225	SYT7	9066	synaptotagmin 7
KIF5C	9.42653e-230	285754159579239	1	0.882	1.48194e-224	KIF5C	3800	kinesin family member 5C
SCG2	2.05328e-227	173377324643143	0.678	0.019	3.22796e-223	SCG2	7857	secretogranin II
POU2F2	5.19263e-225	127660803430947	0.749	0.051	8.16333e-221	POU2F2	5452	POU class 2 homeobox 2
FSTL5	5.85478e-225	194716280838634	0.656	0.013	9.20429e-221	FSTL5	56884	follistatin like 5
RTN1	1.04562e-224	262942197357094	0.967	0.467	1.64382e-220	RTN1	6252	reticulon 1
STXBP1	6.21876e-222	19438389138264	0.97	0.479	9.77652e-218	STXBP1	6812	syntaxin binding protein 1
KIF5A	1.1031e-221	186371629003582	0.963	0.409	1.73418e-217	KIF5A	3798	kinesin family member 5A
SYN1	1.98702e-221	1064939937444	0.686	0.025	3.12379e-217	SYN1	6853	synapsin I
PCSK2	1.24379e-220	167612966569372	0.831	0.117	1.95536e-216	PCSK2	5126	proprotein convertase subtilisin/kexin type 2
LHX1	1.82115e-220	156624415689316	0.634	0.007	2.86303e-216	LHX1	3975	LIM homeobox 1
UNC79	8.2608e-219	120202400080023	0.831	0.11	1.29868e-214	UNC79	57578	unc-79 homolog, NALCN channel complex subunit
INSM1	1.72354e-216	163875933753283	0.827	0.091	2.70958e-212	INSM1	3642	INSM transcriptional repressor 1
SYN3	7.15878e-216	115881688826343	0.682	0.029	1.12543e-211	SYN3	8224	synapsin III
LRRN3	4.94936e-214	153347063260395	0.652	0.02	7.78089e-210	LRRN3	54674	leucine rich repeat neuronal 3
STMN4	3.49947e-213	261624488716601	0.954	0.357	5.50152e-209	STMN4	81551	stathmin 4
RUNX1T1	1.12805e-212	106138667459914	0.667	0.025	1.77341e-208	RUNX1T1	862	RUNX1 partner transcriptional co-repressor 1
PPP2R2C	6.01336e-213	136909797483268	0.632	0.014	9.4536e-208	PPP2R2C	5522	protein phosphatase 2 regulatory subunit Bgamma
CAMK2N2	4.41629e-209	120690909970854	0.727	0.056	6.94285e-205	CAMK2N2	94032	calcium/calmodulin dependent protein kinase II inhibitor 2
ISLR2	1.10572e-208	220233145985721	0.914	0.278	1.7383e-204	ISLR2	57611	immunoglobulin superfamily containing leucine rich repeat 2
DCX	4.17823e-207	249014116682693	0.985	0.797	6.56859e-203	DCX	1641	doublecortin
IGFBPL1	4.62866e-206	25573853599452	0.939	0.384	7.27672e-202	IGFBPL1	347252	insulin like growth factor binding protein like 1
SAMD5	8.88811e-205	175314584192838	0.649	0.027	1.3973e-200	SAMD5	389432	sterile alpha motif domain containing 5
GDAP1L1	1.84232e-204	141206408134117	0.833	0.146	2.89631e-200	GDAP1L1	78997	ganglioside induced differentiation associated protein 1 like 1
GNG3	4.77871e-203	191479820934447	0.859	0.205	7.51262e-199	GNG3	2785	G protein subunit gamma 3
SH3BP5	3.00944e-202	109120357665509	0.693	0.048	4.73114e-198	SH3BP5	9467	SH3 domain binding protein 5
SCN9A	2.15789e-201	180127217470083	0.777	0.106	3.39242e-197	SCN9A	6335	sodium voltage-gated channel alpha subunit 9
KALRN	1.14754e-199	175957736423147	0.976	0.642	1.80404e-195	KALRN	8997	kalirin RhoGEF kinase
RSPO3	2.03399e-199	193774986024883	0.576	0.004	3.19763e-196	RSPO3	84870	R-spondin 3
PHACTR3	2.43297e-198	109641662791347	0.71	0.06	3.82487e-194	PHACTR3	116154	phosphatase and actin regulator 3
MAP2	2.46923e-198	167319132818895	0.989	0.972	3.88188e-194	MAP2	4133	microtubule associated protein 2
SH2D3C	5.49134e-198	104901812665385	0.717	0.063	8.63293e-194	SH2D3C	10044	SH2 domain containing 3C
CNR1	1.07906e-197	158177661947372	0.716	0.072	1.6964e-192	CNR1	56144	protocadherin alpha 4
RFTN1	2.39895e-197	152986806472675	0.639	0.032	3.7714e-191	RFTN1	23180	raftlin, lipid raft linker 1
CADM3	1.07712e-194	129721770853487	0.829	0.154	1.69335e-190	CADM3	57863	cell adhesion molecule 3
CELSR3	2.34372e-194	116805485439584	0.857	0.178	3.68456e-190	CELSR3	1951	cadherin EGF LAG seven-pass G-type receptor 3
DPYSL3	2.83143e-194	18005594477973	0.991	0.956	4.4513e-190	DPYSL3	1809	dihydropyrimidinase like 3
CNTN1	9.00647e-193	144889950657126	0.656	0.041	1.41591e-188	CNTN1	1272	contactin 1
RTN2	2.40416e-192	109389025605704	0.792	0.117	3.77958e-188	RTN2	6253	reticulon 2
UCHL1	5.22122e-192	156861318884196	0.993	0.964	8.20829e-189	UCHL1	7345	ubiquitin C-terminal hydrolase L1
GNG8	1.48411e-190	161317095732248	0.699	0.068	2.33317e-186	GNG8	94235	G protein subunit gamma 8
TBR1	5.55113e-190	289019984916642	0.582	0.015	8.72693e-186	TBR1	10716	T-box brain transcription factor 1
SYT1	5.3101e-189	204357882414122	0.922	0.4	8.34802e-185	SYT1	6857	synaptotagmin 1
KLHL4	1.9734e-188	1447570365926	0.608	0.024	3.10238e-184	KLHL4	56062	kelch like family member 4
DMTN	4.07461e-187	10729142590411	0.801	0.124	6.40569e-187	DMTN	2039	dematin actin binding protein
SCN3A	9.84676e-188	146691037951139	0.818	0.16	1.54801e-182	SCN3A	6328	sodium voltage-gated channel alpha subunit 3
APC2	9.93457e-187	161904599593238	0.989	0.832	1.56181e-182	APC2	10297	APC regulator of WNT signaling pathway 2
NEFL	1.38656e-186	198379759097634	0.862	0.251	2.17981e-182	NEFL	4747	neurofilament light chain
NCAM1	2.1496e-186	187028320409642	0.974	0.784	3.37939e-182	NCAM1	4684	neural cell adhesion molecule 1
MAP1B	3.33321e-185	187466878993062	0.998	0.993	5.24014e-181	MAP1B	4131	microtubule associated protein 1B
PCSK1	1.74261e-183	201648942259859	0.695	0.07	2.73956e-179	PCSK1	5122	proprotein convertase subtilisin/kexin type 1
TMEFF1	2.61477e-184	144729614133473	0.985	0.949	4.11067e-180	TMEFF1	8577	transmembrane protein with EGF like and two follistatin like domains 1
GDI1	4.72752e-183	139530381540664	0.987	0.96	7.43213e-179	GDI1	2664	GDP dissociation inhibitor 1
GRIA1	2.149e-182	172859874103314	0.868	0.253	3.37844e-178	GRIA1	2890	glutamate ionotropic receptor AMPA type subunit 1
MYT1	5.83666e-181	133518324305397	0.881	0.227	9.17581e-176	MYT1	4661	myelin transcription factor 1
BSN	7.78025e-180	107567567914856	0.835	0.172	1.22313e-175	BSN	8927	bassoon presynaptic cytomatrix protein
MAST1	1.90681e-179	144353404380527	0.928	0.389	2.9977e-174	MAST1	22983	microtubule associated serine/threonine kinase 1
MLLT11	6.15847e-178	210069079402869	0.978	0.854	9.68173e-175	MLLT11	10962	MLLT11 transcription factor 7 cofactor
RET	1.05552e-178	114530396366547	0.571	0.02	1.65938e-173	RET	5979	ret proto-oncogene
ARHGDIG	1.59093e-177	122633470672523	0.63	0.043	2.5011e-173	ARHGDIG	398	Rho GDP dissociation inhibitor gamma
MAP6	1.77062e-177	142055699341761	0.991	0.938	2.78359e-173	MAP6	4135	microtubule associated protein 6
MAPK8IP1	4.31567e-178	148092658667701	0.963	0.529	6.78467e-174	MAPK8IP1	9479	mitogen-activated protein kinase 8 interacting protein 1
CTNNA2	1.36552e-176	1445078859556	0.872	0.272	2.14674e-173	CTNNA2	1496	catenin alpha 2
MDGA1	1.51473e-176	146605209471033	0.835	0.194	2.3813e-172	MDGA1	266727	MAM domain containing glycosylphosphatidylinositol anchor 1
GRIK2	2.80897e-176	122774428131625	0.652	0.054	4.41598e-172	GRIK2	2898	glutamate ionotropic receptor kainate type subunit 2
UNCX	6.42689e-176	111550413337363	0.53	0.006	1.01037e-172	UNCX	340260	UNC homeobox
ACAP3	1.19279e-175	152834646024959	0.974	0.738	1.87519e-171	ACAP3	116983	ArfGAP with coiled-coil, ankyrin repeat and PH domains 3
CPE	1.82861e-175	152919611413722	0.989	0.952	2.87476e-171	CPE	1363	carboxypeptidase E
NRG1	1.50756e-174	120827443520917	0.82	0.169	2.37003e-170	NRG1	3084	neuregulin 1
PCBP4	1.70937e-174	169656165125145	0.98	0.799	2.68731e-170	PCBP4	57060	poly(rC) binding protein 4
GPRIN1	5.19021e-174	129756933209015	0.879	0.226	8.15953e-170	GPRIN1	114787	G protein regulated inducer of neurite outgrowth 1
GNG2	8.68986e-174	168708435978758	0.937	0.544	1.36613e-169	GNG2	54331	G protein subunit gamma 2
CNIH2	1.55105e-173	171773955654693	0.942	0.558	2.43841e-169	CNIH2	254263	cornichon family AMPA receptor auxiliary protein 2
SNCG	2.3757e-173	167987957881858	0.708	0.099	3.73484e-169	SNCG	6623	synuclein gamma
TAGLN3	4.10415e-173	152892868062737	0.914	0.371	6.45213e-169	TAGLN3	29114	transgelin 3
KIF1A	4.42495e-173	144277244069191	0.987	0.858	6.95646e-169	KIF1A	547	kinesin family member 1A
CLASP2	3.37571e-172	158855938646598	0.972	0.84	5.30695e-168	CLASP2	23122	cytoplasmic linker associated protein 2
ADCY2	2.4403e-171	164889670277062	0.6	0.039	3.8364e-167	ADCY2	108	adenylate cyclase 2
BASP1	5.81936e-171	165420891341824	0.974	0.879	9.14861e-167	BASP1	10409	brain abundant membrane attached signal protein 1
APLP1	7.9531e-172	182080878719975	0.965	0.808	1.25031e-166	APLP1	333	amyloid beta precursor like protein 1
KLC1	1.31379e-170	128135982118915	0.983	0.926	2.06541e-166	KLC1	3831	kinesin light chain 1
GPC2	1.34049e-170	16330678471996	0.981	0.849	2.10739e-166	GPC2	221914	glypican 2
ST18	2.04754e-170	135199615525576	0.528	0.01	3.21893e-166	ST18	9705	ST18 C2H2C-type zinc finger transcription factor
SEMA6D	9.13141e-170	106178279679868	0.658	0.062	1.43555e-165	SEMA6D	80031	semaphorin 6D
NDRG4	2.62702e-166	172240116655184	0.942	0.539	4.12994e-162	NDRG4	65009	NDRG family member 4
UNC80	1.54905e-165	129554329026112	0.779	0.146	2.43526e-161	UNC80	285175	unc-80 homolog, NALCN channel complex subunit
GDAP1	4.55275e-164	138081492106239	0.955	0.57	7.15738e-160	GDAP1	54332	ganglioside induced differentiation associated protein 1
DCTN1	1.17983e-163	116041957056405	0.987	0.917	1.85481e-159	DCTN1	1639	dynactin subunit 1
PTGER3	3.14699e-163	174651307036876	0.5	0.007	4.94738e-159	PTGER3	5733	prostaglandin E receptor 3
PTPRO	1.76653e-162	184920505465624	0.768	0.161	2.77716e-158	PTPRO	5800	protein tyrosine phosphatase receptor type O
CNGA3	3.37214e-162	105014882877475	0.73	0.109	5.30134e-158	CNGA3	1261	cyclic nucleotide gated channel subunit alpha 3
TMEM59L	3.72105e-162	195644962284178	0.874	0.357	5.84986e-158	TMEM59L	25789	transmembrane protein 59 like
FRRS1L	7.675e-162	104560565425113	0.645	0.067	1.20659e-157	FRRS1L	23732	ferric chelate reductase 1 like
DAAM1	2.133e-161	134230147124295	0.978	0.766	3.35329e-156	DAAM1	23002	dishevelled associated activator of morphogenesis 1
NRN1	2.14078e-160	115574845573834	0.58	0.037	3.36551e-156	NRN1	51299	neuritin 1
TMOD2	1.67534e-160	132199573971938	0.872	0.306	2.63379e-155	TMOD2	29767	tropomodulin 2
PSD2	2.59652e-159	105898737832904	0.758	0.144	4.08199e-155	PSD2	84249	pleckstrin and Sec7 domain containing 2
CLSTN2	3.15037e-159	100922915471359	0.55	0.026	4.9527e-156	CLSTN2	64084	calsyntenin 2
TERF2IP	9.56859e-159	14688524606707	0.97	0.892	1.50428e-154	TERF2IP	54386	TERF2 interacting protein
RTN4	1.43872e-156	120552586080435	0.981	0.912	2.26181e-152	RTN4	57142	reticulon 4
GSE1	4.53541e-156	148234780947696	0.939	0.53	7.13011e-152	GSE1	23199	Gse1 coiled-coil protein
CACNA1E	7.09529e-157	131892387538263	0.638	0.074	1.11545e-151	CACNA1E	777	calcium voltage-gated channel subunit alpha1 E
DCLK1	1.44884e-155	156747550522531	0.918	0.476	2.27772e-151	DCLK1	9201	doublecortin like kinase 1
CACNA2D1	1.72883e-155	175438111947676	0.849	0.321	2.71789e-151	CACNA2D1	781	calcium voltage-gated channel auxiliary subunit alpha2delta 1
SERINC1	2.62254e-155	145091311451824	0.963	0.871	4.1229e-151	SERINC1	57515	serine incorporator 1
KCNH2	7.1634e-155	107851814032523	0.82	0.206	1.12616e-150	KCNH2	3757	potassium voltage-gated channel subfamily H member 2
SNAP91	1.19769e-154	10990167891013	0.81	0.217	1.8829e-150	SNAP91	9892	synaptosome associated protein 91
CDK5R1	1.75255e-154	147558260062223	0.892	0.39	2.75518e-153	CDK5R1	8851	cyclin dependent kinase 5 regulatory subunit 1
DMRTA2	4.40607e-154	110495047457628	0.509	0.017	6.92679e-150	DMRTA2	63950	DMRT like family A2
VAT1	2.44933e-153	142894206525254	0.968	0.846	3.85058e-149	VAT1	10493	vesicle amine transport 1
NCAN	9.75935e-153	143103951673668	0.952	0.512	1.53427e-148	NCAN	1463	neurocan
PGM2L1	6.73592e-152	136125201536799	0.844	0.299	1.05895e-147	PGM2L1	283209	phosphoglucomutase 2 like 1
KIDINS220	8.45801e-152	150069142091403	0.989	0.912	1.32968e-147	KIDINS220	57498	kinase D interacting substrate 220
RAB6B	1.77158e-151	15045733606499	0.935	0.586	2.78511e-147	RAB6B	51560	RAB6B, member RAS oncogene family
SYT11	9.15312e-151	140484865524787	0.981	0.913	1.43896e-146	SYT11	23208	synaptotagmin 11
CRMP1	1.81002e-150	14126331407154	0.989	0.928	2.84553e-146	CRMP1	1400	collapsin response mediator protein 1
LINGO1	2.66006e-151	151090255717411	0.9	0.383	4.18188e-148	LINGO1	84894	leucine rich repeat and Ig domain containing 1
EEF1A2	3.01551e-150	123659527401391	0.712	0.125	4.74068e-146	EEF1A2	1917	eukaryotic translation elongation factor 1 alpha 2
CELF5	4.14514e-149	136818398294574	0.952	0.578	6.51657e-145	CELF5	60680	CUGBP Elav-like family member 5
ENO2	1.18512e-148	145146283286111	0.981	0.902	1.86313e-144	ENO2	2026	enolase 2
EBF3	1.39202e-146	104416383544294	0.511	0.024	2.1884e-142	EBF3	22924	microtubule associated protein RP/EB family member 3
TSPAN7	4.05871e-146	157672040250401	0.853	0.336	6.3807e-142	TSPAN7	7102	tetraspanin 7
SOGA3	4.85291e-146	12344229551332	0.978	0.72	7.62926e-142	SOGA3	387104	SOGA family member 3
PLD3	1.38516e-144	118785852743784	0.976	0.934	2.17761e-140	PLD3	23646	phospholipase D family member 3
RCAN2	4.46637e-143	106877349036583	0.638	0.083	7.02159e-139	RCAN2	10231	regulator of calcineurin 2
NYAP1	1.219e-142	105845556159241	0.875	0.333	1.91639e-138	NYAP1	222950	neuronal tyrosine phosphorylated phosphoinositide-3-kinase adaptor 1
PLPPR2	2.0096e-142	125794447807255	0.87	0.332	3.15929e-138	PLPPR2	64748	phospholipid phosphatase related 2
TUBB2A	1.7199e-141	229816123934466	0.92	0.612	2.70386e-137	TUBB2A	7280	tubulin beta 2A class IIa
NHLH1	1.90425e-141	174917746760437	0.504	0.027	2.99367e-137	NHLH1	4807	nescient helix-loop-helix 1
CHRNA3	7.49816e-141	15122646938376	0.439	0.004	1.17879e-136	CHRNA3	1136	cholinergic receptor nicotinic alpha 3 subunit
SPTAN1	3.92606e-140	125800722142064	0.991	0.947	6.17217e-136	SPTAN1	6709	spectrin alpha, non-erythrocytic 1
VSTM2L	4.77307e-140	105886295580803	0.712	0.139	7.50374e-135	VSTM2L	128434	V-set and transmembrane domain containing 2 like
KLHL35	6.22106e-139	103414606023338	0.47	0.016	9.78013e-135	KLHL35	8507	ectodermal-neural cortex 1
VWA5A	5.23494e-139	155205517528337	0.848	0.36	8.22985e-134	VWA5A	4013	von Willebrand factor A domain containing 5A
SAMD3	1.40126e-137	164256336198407	0.47	0.018	2.20293e-133	SAMD3	154075	sterile alpha motif domain containing 3
TUBB2B	1.46083e-137	157304043537575	0.994	0.997	2.29658e-133	TUBB2B	347733	tubulin beta 2B class IIb
ANKS1B	5.23284e-137	126676655004405	0.883	0.383	8.22655e-133	ANKS1B	56899	ankyrin repeat and sterile alpha motif domain containing 1B
SYT13	1.87865e-136	134568270193352	0.717	0.167	2.95343e-132	SYT13	57586	synaptotagmin 13
RGMB	5.31692e-136	184980563765594	0.9	0.451	8.35873e-132	RGMB	285704	repulsive guidance molecule BMP co-receptor b
FAM241B	5.46186e-135	100438298967634	0.799	0.222	8.58659e-131	FAM241B	219738	family with sequence similarity 241 member B
BRSK1	6.31805e-136	111035398516006	0.98	0.8	9.93261e-131	BRSK1	84446	BR serine/threonine kinase 1
PSD	7.82686e-135	105131362050628	0.848	0.278	1.23046e-130	PSD	5662	pleckstrin and Sec7 domain containing
SCAMP5	1.25218e-133	112249055840281	0.84	0.325	1.96855e-129	SCAMP5	192683	secretory carrier membrane protein 5
FNBP1L	1.71188e-133	106383567692749	0.968	0.921	2.69124e-130	FNBP1L	54874	formin binding protein 1 like
DLG4	1.84281e-133	109228710906156	0.985	0.888	2.89709e-129	DLG4	1742	discs large MAGUK scaffold protein 4
BSCL2	8.39437e-133	13228646835378	0.939	0.73	1.31968e-128	BSCL2	26580	BSCL2 lipid droplet biogenesis associated, seipin
NSG1	2.66976e-132	154572811181834	0.861	0.378	4.19713e-128	NSG1	27065	neuronal vesicle trafficking associated 1
AMER2	2.699e-132	105451355224329	0.833	0.277	4.2431e-128	AMER2	219287	APC membrane recruitment protein 2
KIF3C	2.96548e-132	13161745882504	0.905	0.524	4.66203e-128	KIF3C	3797	kinesin family member 3C
NOVA2	3.21677e-132	106641129826393	0.978	0.907	5.05709e-129	NOVA2	4858	NOVA alternative splicing regulator 2
SYNGR3	4.77794e-132	104666117464149	0.738	0.165	7.51139e-128	SYNGR3	9143	synaptogyrin 3
CXXC5	6.56682e-132	117767505826139	0.914	0.524	1.03237e-127	CXXC5	51523	CXXC finger protein 5
ATP9A	8.61446e-132	148423160352005	0.935	0.634	1.35428e-127	ATP9A	10079	ATPase phospholipid transporting 9A (putative)
MAPRE3	1.60034e-131	118208137792783	0.935	0.633	2.51589e-126	MAPRE3	22924	microtubule associated protein RP/EB family member 3
CEP170	2.43888e-130	127248287725436	0.941	0.747	3.83416e-126	CEP170	9859	centrosomal protein 170
DST	2.85826e-130	122239502364755	0.959	0.792	4.49347e-125	DST	667	dystonin
PPP2R5B	5.53454e-129	109035524108903	0.81	0.25	8.70086e-125	PPP2R5B	5526	protein phosphatase 2 regulatory subunit B'beta
MGAT4C	2.01044e-128	108259682004442	0.416	0.007	3.16061e-124	MGAT4C	25834	MGAT4 family member C
KLF7	2.40583e-127	110400430832277	0.89	0.427	3.7822e-123	KLF7	8609	KLF transcription factor 7
EBF1	9.14896e-125	137185217825196	0.803	0.312	1.43831e-120	EBF1	1879	EBF transcription factor 1
CNTN2	4.43047e-124	166791568437446	0.69	0.151	6.96514e-120	CNTN2	6900	contactin 2
PLEKHA6	3.01502e-123	104773713097515	0.89	0.404	4.73992e-119	PLEKHA6	22874	pleckstrin homology domain containing A6
GPR149	5.94262e-123	163004220221437	0.388	0.003	9.34239e-120	GPR149	344758	G protein-coupled receptor 149
RBFOX2	8.02883e-123	101406126479365	0.97	0.878	1.26221e-118	RBFOX2	23543	RNA binding fox-1 homolog 2
CMIP	1.23799e-122	105566626650355	0.955	0.829	1.94624e-118	CMIP	80790	c-Maf inducing protein
VGF	4.02273e-122	102578830797174	0.411	0.009	6.32413e-118	VGF	7425	VGF nerve growth factor inducible
PLPPR3	6.57893e-121	110278996500093	0.968	0.831	1.03427e-116	PLPPR3	79948	phospholipid phosphatase related 3
SPOCK2	1.46144e-120	121662753648907	0.535	0.064	2.29753e-116	SPOCK2	9806	SPARC (osteonectin), cwcv and kazal like domains proteoglycan 2
KIAA0408	1.43183e-118	107139812082448	0.924	0.546	2.25098e-114	KIAA0408	9729	KIAA0408
SV2A	1.2261e-117	123623054910119	0.857	0.449	1.92756e-113	SV2A	9900	synaptic vesicle glycoprotein 2A
PLXNA1	5.65838e-116	117959646599207	0.926	0.621	8.89554e-112	PLXNA1	5361	plexin A1
ELAVL2	1.82168e-115	134520713420507	0.896	0.522	2.86386e-111	ELAVL2	1993	ELAV like RNA binding protein 2
DLL3	1.96474e-115	105367408479832	0.695	0.152	3.08877e-111	DLL3	10683	delta like canonical Notch ligand 3
CCDC184	2.80187e-115	104981838959317	0.818	0.328	4.40483e-111	CCDC184	387856	coiled-coil domain containing 184
SLC4A8	3.04255e-115	122424587219857	0.931	0.659	4.78319e-111	SLC4A8	9498	solute carrier family 4 member 8
NT5C2	1.89518e-114	101287224877551	0.929	0.625	2.97942e-110	NT5C2	22978	5'-nucleotidase, cytosolic II
DPYSL5	2.61586e-114	107007981470135	0.954	0.9	4.11239e-110	DPYSL5	56896	dihydropyrimidinase like 5
KIFAP3	2.66501e-113	10763741604473	0.872	0.429	4.18966e-109	KIFAP3	22920	kinesin associated protein 3
PTPRD	3.11667e-113	138064987999665	0.935	0.657	4.89971e-109	PTPRD	5789	protein tyrosine phosphatase receptor type D
GPM6A	7.84714e-114	176073298140065	0.911	0.769	1.23365e-108	GPM6A	2823	glycoprotein M6A
CDH18	9.29395e-111	114287687633519	0.416	0.022	1.4611e-106	CDH18	1016	cadherin 18
PCDH1	1.65876e-110	116414527042073	0.857	0.387	2.60774e-106	PCDH1	5097	protocadherin 1
CAMKV	2.78763e-110	102137418573222	0.822	0.299	4.38243e-105	CAMKV	79012	CaM kinase like vesicle associated
ANK3	3.09983e-109	118185992756139	0.946	0.789	4.87325e-105	ANK3	288	ankyrin 3
RIMS3	4.82034e-109	117573240856104	0.851	0.421	7.57805e-105	RIMS3	9783	regulating synaptic membrane exocytosis 3
CPEB4	4.90473e-109	102851293714591	0.831	0.367	7.71072e-105	CPEB4	80315	cytoplasmic polyadenylation element binding protein 4
ACSL4	5.79359e-109	134240752171334	0.954	0.821	9.10811e-105	ACSL4	2182	acyl-CoA synthetase long chain family member 4
PAK3	4.26507e-108	126869480341215	0.939	0.724	6.70512e-104	PAK3	8874	Rho guanine nucleotide exchange factor 7
ADD2	2.18377e-106	103961135797124	0.888	0.535	3.4331e-102	ADD2	119	adducin 2
ATP6V0A1	4.49669e-106	108456386248381	0.914	0.669	7.06925e-103	ATP6V0A1	535	ATPase H+ transporting V0 subunit a1
CLSTN3	7.01818e-108	116473680993574	0.933	0.663	1.10333e-101	CLSTN3	9746	calsyntenin 3
GNAI1	1.96147e-103	107485741564918	0.9	0.549	3.08363e-99	GNAI1	2770	G protein subunit alpha i1
SOX4	3.78806e-103	110460813151082	0.98	0.951	5.95521e-99	SOX4	6659	SRY-box transcription factor 4
TMEM151B	2.94241e-102	100192149984687	0.855	0.382	4.62577e-98	TMEM151B	441151	transmembrane protein 151B
PRRT2	1.39203e-102	136029243785355	0.901	0.65	2.18842e-97	PRRT2	112476	proline rich transmembrane protein 2
TIMP2	1.5512e-100	111054357341291	0.954	0.856	2.43864e-96	TIMP2	7077	TIMP metallopeptidase inhibitor 2
PKIA	3.84242e-100	113163679085116	0.9	0.681	6.04066e-96	PKIA	5569	cAMP-dependent protein kinase inhibitor alpha
SNCA	4.30453e-100	122733643213121	0.757	0.285	6.76715e-96	SNCA	6622	synuclein alpha
THBS3	1.96427e-99	118085557158729	0.861	0.431	3.08803e-95	THBS3	7059	thrombospondin 3
NAPB	2.39359e-99	102152729546375	0.848	0.452	3.76297e-95	NAPB	256236	napsin B aspartic peptidase, pseudogene
SUSD4	3.06669e-99	157177770614311	0.431	0.039	4.82114e-95	SUSD4	55061	sushi domain containing 4
SPTBN1	5.37021e-98	100581018886607	0.875	0.549	8.4425e-93	SPTBN1	6711	spectrin beta, non-erythrocytic 1
CHRNB4	2.15597e-96	104691586620723	0.346	0.01	3.38939e-92	CHRNB4	1143	cholinergic receptor nicotinic beta 4 subunit
SEPTIN3	2.62716e-96	106502344844486	0.888	0.636	4.13016e-92	SEPTIN3	55964	septin 3
PBX1	6.46195e-95	112996960922476	0.98	0.945	1.01588e-90	PBX1	5087	PBX homeobox 1
PEG10	1.7982e-94	17908712121377	0.952	0.897	2.82694e-90	PEG10	23089	paternally expressed 10
EOMES	2.17522e-94	125132718091096	0.318	0.003	3.41966e-90	EOMES	8320	eomesodermin
CDKN1C	4.35476e-94	149676306847717	0.81	0.37	6.84612e-90	CDKN1C	1028	cyclin dependent kinase inhibitor 1C
TMX4	1.35321e-93	105349205290559	0.855	0.457	2.12738e-89	TMX4	56255	thioredoxin related transmembrane protein 4
ROBO1	3.28961e-92	153064087935361	0.929	0.805	5.17159e-88	ROBO1	6091	roundabout guidance receptor 1
BEX1	1.83195e-91	103894600313098	0.898	0.602	2.88e-87	BEX1	55859	brain expressed X-linked 1
TNIK	6.03902e-91	112712157540862	0.779	0.301	9.49394e-87	TNIK	23043	TRAF2 and NCK interacting kinase
CASTOR3	6.27383e-91	109078427791905	0.92	0.679	9.8631e-87	CASTOR3	352954	CASTOR family member 3, pseudogene
ST7	1.36275e-91	111399539943728	0.855	0.499	2.14238e-87	ST7	7982	suppression of tumorigenicity 7
SLC22A17	6.68206e-90	107323592779382	0.935	0.805	1.05049e-85	SLC22A17	51310	solute carrier family 22 member 17
SH3BGRL2	3.92546e-87	107065192678679	0.836	0.459	6.17121e-84	SH3BGRL2	83699	SH3 domain binding glutamate rich protein like 2
CAMK2N1	1.71823e-86	104698930661767	0.883	0.621	2.70123e-82	CAMK2N1	55450	calcium/calmodulin dependent protein kinase II inhibitor 1
CD24	8.13971e-86	105924182404437	0.967	0.937	1.27964e-81	CD24	100133941	CD24 molecule
DNER	4.646e-84	11222388111086	0.914	0.657	7.30397e-80	DNER	92737	delta/notch like EGF repeat containing
FAM219A	1.10701e-82	102773349665902	0.877	0.523	1.74033e-77	FAM219A	203259	family with sequence similarity 219 member A
XPR1	8.85222e-81	111520985782884	0.933	0.797	1.39166e-75	XPR1	9213	xenotropic and polytropic retrovirus receptor 1
SULF2	3.08398e-74	123721420880468	0.612	0.19	4.84833e-70	SULF2	55959	sulfatase 2
NOVA1	1.75416e-71	100302737078054	0.92	0.711	2.75771e-67	NOVA1	4857	NOVA alternative splicing regulator 1
THSD7A	2.89394e-70	113153232056149	0.693	0.28	4.54956e-66	THSD7A	221981	thrombospondin type 1 domain containing 7A
NEGR1	1.18061e-68	118269698309073	0.615	0.213	1.85604e-64	NEGR1	257194	neuronal growth regulator 1
TUBA1A	3.45977e-68	164986082171826	0.883	0.795	5.43911e-65	TUBA1A	7846	tubulin alpha 1a
LRRTM4	5.52778e-67	111192274917667	0.76	0.377	8.69022e-65	LRRTM4	80059	leucine rich repeat transmembrane neuronal 4
ALCAM	6.05479e-65	112512600067318	0.446	0.094	9.51873e-63	ALCAM	214	activated leukocyte cell adhesion molecule
STMN1	2.04114e-62	1273087582708	0.875	0.768	3.20887e-59	STMN1	3925	stathmin 1
NELL1	4.5291e-62	104658452335395	0.236	0.005	7.1202e-58	NELL1	4745	neural EGFL like 1
CBFA2T2	2.83905e-61	118088885447076	0.909	0.751	4.46326e-57	CBFA2T2	9139	CBFA2/RUNX1 partner transcriptional co-repressor 2
VSNL1	3.15298e-61	14283186486603	0.275	0.018	4.9568e-57	VSNL1	7447	visinin like 1
NRP1	1.14416e-60	109273075696739	0.812	0.509	1.79874e-56	NRP1	8829	neuropilin 1
PAGR1	2.70165e-60	105178152868917	0.913	0.735	4.24726e-57	PAGR1	79447	PAXIP1 associated glutamate rich protein 1
DACH1	4.07544e-56	103449613001296	0.922	0.766	6.40699e-52	DACH1	1602	dachshund family transcription factor 1
CRABP1	7.82939e-51	282107200236267	0.678	0.341	1.23086e-46	CRABP1	1381	cellular retinoic acid binding protein 1
RASGRP1	4.47555e-34	105108092044244	0.61	0.328	7.03602e-31	RASGRP1	10125	RAS guanyl releasing protein 1
CDH12	1.51825e-23	10995006399013	0.407	0.167	2.38684e-19	CDH12	1010	cadherin 12

## Sheet: DE_IPC_Vs_NPC_Down
Gene	p_val	avg_log2FC	pct.1	pct.2	p_val_adj
GLI3	5.1e-241	-315248134949145	0.394	0.999	8.02e-237
TTYH1	7.31e-232	-286092221776028	0.558	0.992	1.15e-226
ZFP36L1	5.92e-230	-287237377654745	0.121	0.98	9.3e-227
COL2A1	1.89e-228	-244058011709018	0.128	0.974	2.98e-224
VIM	5.02e-226	-307473865678109	0.849	0.999	7.88e-222
SFRP1	1.48e-215	-255037393124083	0.68	0.987	2.33e-211
FKBP10	2.57e-213	-191498753144432	0.227	0.97	4.04e-206
BOC	2.93e-210	-216227120388275	0.309	0.965	4.6e-206
QKI	6.23e-209	-199178828943109	0.625	0.99	9.79e-205
SOX9	1.7e-208	-235311256219223	0.216	0.953	2.66e-204
YAP1	1.15e-206	-176939890898752	0.069	0.93	1.81e-202
HES5	9.75e-204	-283963765986646	0.277	0.988	1.53e-199
COL4A5	3.89e-203	-226319825422379	0.37	0.98	6.11e-199
HMGA2	7.42e-201	-202295744536803	0.249	0.953	1.17e-197
SOX2	4.7e-200	-209881437499301	0.355	0.982	7.39e-196
NOTCH1	4.64e-198	-199228600900553	0.273	0.988	7.29e-193
SPARC	5.75e-193	-231674986162923	0.325	0.948	9.05e-189
NOTCH3	5.85e-191	-171528040311983	0.119	0.908	9.2e-187
FZD2	6.53e-192	-178875520176111	0.416	0.966	1.03e-186
PTPRZ1	3.97e-188	-170336858620393	0.779	0.992	6.23e-184
FRZB	1.55e-187	-228008254477406	0.357	0.936	2.43e-183
FOXG1	1.66e-183	-1610108856006	0.885	0.991	2.61e-179
SOX1	6.15e-180	-164936902980442	0.329	0.946	9.67e-176
EFNB1	4.81e-177	-172643723578604	0.814	0.987	7.56e-173
SFRP2	2.18e-174	-173235370083454	0.102	0.878	3.43e-170
SLC16A1	7.97e-173	-153535553920029	0.506	0.961	1.25e-168
MOB3B	1.74e-172	-17055913720361	0.314	0.925	2.73e-168
RACK1	5.76e-172	-153646038337356	0.857	0.987	9.05e-168
TP53	4.52e-171	-156269446354932	0.266	0.917	7.1e-167
FZD8	3.71e-169	-171444343040923	0.377	0.936	5.84e-165
COL4A6	5.49e-166	-186285912913796	0.431	0.951	8.63e-162
VEPH1	1.07e-164	-179781937952442	0.061	0.831	1.68e-160
SDK2	1.02e-163	-152618620605799	0.468	0.949	1.6e-159
TCF7L2	8.56e-162	-136671913453825	0.208	0.888	1.35e-157
SYNE2	2.37e-161	-151456467025139	0.965	0.997	3.72e-157
ID4	3.17e-160	-197136047912774	0.721	0.983	4.98e-156
CD82	1.56e-158	-183587942630122	0.119	0.831	2.45e-154
PRDM16	1.87e-158	-148043719486067	0.305	0.9	2.94e-155
HS6ST2	1.38e-157	-165722386802049	0.219	0.883	2.17e-153
CCND2	9.76e-156	-147711518726805	0.621	0.983	1.53e-151
NOTCH2	2.52e-148	-118660132122267	0.063	0.8	3.97e-144
SOX3	2.97e-147	-170255558769942	0.199	0.858	4.66e-143
TCF7L1	6.88e-147	-118194531437781	0.058	0.786	1.08e-142
GSTP1	8.31e-147	-151906805945054	0.723	0.972	1.31e-142
FGFBP3	1.77e-146	-161175271732513	0.195	0.848	2.78e-142
TEAD2	9.68e-146	-135727734141371	0.392	0.963	1.52e-141
S1PR1	6.4e-144	-12952266990919	0.043	0.764	1.01e-139
HSPB1	3.63e-145	-140327311392565	0.426	0.92	5.71e-139
EEF2	7.3e-143	-101653126290379	0.963	0.994	1.15e-138
SERPINH1	2.08e-142	-138228195190164	0.138	0.816	3.27e-138
AIF1L	7.11e-141	-137707828804908	0.387	0.902	1.12e-136
SMAD3	7.78e-141	-125912179516397	0.292	0.894	1.22e-135
LTBP4	7.67e-139	-126040480845799	0.468	0.923	1.21e-134
SALL4	2.8e-138	-128967107363369	0.433	0.911	4.4e-134
TNFRSF10B	6.08e-138	-159268708570216	0.273	0.877	9.56e-134
CCN1	2.54e-136	-179843970302483	0.046	0.753	3.99e-132
PNRC1	3.42e-136	-129048003610322	0.829	0.982	5.38e-132
NR2E1	2.97e-135	-155797485699253	0.035	0.738	4.68e-131
STK26	3.75e-135	-127977596313967	0.266	0.85	5.9e-131
MAPKAPK3	2.96e-133	-132380060334737	0.489	0.909	4.65e-128
FBL	3.22e-132	-117787192328038	0.422	0.89	5.06e-128
CELSR1	2.01e-131	-112975254770882	0.136	0.791	3.15e-127
DLK1	3e-130	-197070672911846	0.797	0.986	4.72e-126
SHISA2	6.57e-130	-149625525544364	0.338	0.88	1.03e-125
ATP5MC2	9.05e-130	-109973278788774	0.833	0.969	1.42e-125
EEF1G	4.33e-129	-162236870081703	0.812	0.952	6.8e-125
PCDH19	4.68e-129	-171419224114679	0.481	0.922	7.36e-125
NECTIN3	1.52e-127	-135366025729012	0.506	0.91	2.39e-125
SOX21	3.85e-127	-129116945862967	0.11	0.78	6.06e-124
TGIF2	4.07e-126	-119985238651601	0.167	0.808	6.4e-122
PROM1	5.25e-125	-118534999045937	0.059	0.73	8.25e-121
FSTL1	5.82e-126	-120305569281759	0.543	0.955	9.15e-121
CDCA7L	7.56e-126	-114479157194863	0.05	0.72	1.19e-120
REST	5.94e-124	-108230900101765	0.309	0.849	9.34e-120
GLI2	1.01e-121	-113242912756172	0.149	0.77	1.58e-117
NES	1.3e-121	-117435275663693	0.901	0.997	2.04e-117
LAMB2	3.62e-121	-106166197333386	0.102	0.751	5.69e-117
MDK	2.71e-120	-134299151437437	0.822	0.994	4.26e-117
UBA52	1.32e-119	-107243737679173	0.777	0.97	2.08e-115
INPPL1	1.63e-119	-101721473920558	0.203	0.808	2.56e-115
NAV1	8.31e-119	-125855332041742	0.885	0.964	1.31e-115
MRC2	1.14e-119	-111436897022599	0.069	0.715	1.79e-115
BCAT1	2.05e-118	-129378072675579	0.634	0.931	3.22e-114
AASS	2.05e-117	-113037652453464	0.506	0.936	3.22e-113
SALL2	6.69e-116	-108257496618961	0.862	0.977	1.05e-111
EIF3L	5.52e-115	-107602356734389	0.842	0.966	8.69e-111
PLPP3	9.05e-115	-119129942568048	0.329	0.854	1.42e-110
TPM1	9.41e-115	-141027912407758	0.786	0.948	1.48e-110
FABP7	1.31e-114	-180231517865091	0.602	0.918	2.06e-110
ANOS1	4.07e-114	-135689844045966	0.056	0.684	6.39e-110
EFNB2	1.19e-113	-195302075282575	0.26	0.793	1.87e-109
ANTXR1	3.21e-113	-103420513564241	0.441	0.902	5.05e-109
MPPED1	3.22e-113	-131818237152243	0.119	0.731	5.06e-109
COL4A2	3.66e-114	-115392256711822	0.704	0.95	5.75e-109
LFNG	8.04e-113	-115324466067464	0.286	0.846	1.26e-108
GSX2	8.89e-113	-141031999658413	0.041	0.674	1.4e-108
STON1	1.03e-112	-108611518659104	0.087	0.703	1.63e-109
TRIM24	2.93e-112	-101820410164186	0.924	0.991	4.61e-108
LTA4H	3.22e-112	-108810340709554	0.652	0.932	5.07e-108
PSAT1	4.71e-112	-129461891296637	0.474	0.896	7.41e-108
FOXP4	2.8e-112	-106491441793149	0.452	0.909	4.4e-108
CRB2	1.09e-110	-111395187797644	0.73	0.975	1.71e-108
TNS3	3.16e-110	-101691313226466	0.076	0.697	4.96e-106
NPC2	4.3e-109	-120131363904639	0.333	0.828	6.76e-105
TGIF1	2.63e-108	-10805193616657	0.099	0.715	4.14e-104
ENO1	5.76e-108	-13543038394861	0.74	0.957	9.05e-104
TLE1	1.06e-107	-117152355639909	0.409	0.898	1.66e-103
HELLS	1.43e-107	-150532448554199	0.617	0.899	2.25e-103
NEK6	1.72e-107	-106579602944616	0.55	0.917	2.71e-103
CDK4	1.1e-108	-108056340707736	0.725	0.934	1.73e-102
CREB5	2.49e-106	-160480765993724	0.279	0.824	3.92e-102
MCM2	9.17e-106	-16375399388807	0.307	0.782	1.44e-101
FAT1	2.51e-105	-102212253886006	0.63	0.92	3.95e-101
ABCC4	2.53e-106	-105513917291259	0.336	0.827	3.97e-101
CCND1	1.19e-104	-11053352326647	0.333	0.864	1.88e-101
NFATC4	4.95e-104	-100302132685503	0.18	0.761	7.79e-100
CDH20	1.83e-103	-124326815850391	0.167	0.728	2.88e-99
ATP2B4	2.77e-103	-107931731151368	0.309	0.84	4.35e-99
CD99	3.04e-103	-102472709412179	0.208	0.768	4.77e-99
FN1	5.7e-102	-126522504438231	0.193	0.744	8.96e-98
PLEKHG4B	1.02e-101	-104350072627397	0.253	0.784	1.6e-97
SMOC1	9.93e-101	-152181572775901	0.439	0.869	1.56e-96
SLC2A1	4.77e-99	-154757657667692	0.682	0.913	7.51e-95
HES4	5.7e-99	-139795855832641	0.673	0.918	8.96e-95
VCAN	3.94e-99	-10678550246348	0.678	0.976	6.2e-94
FZD5	1.12e-97	-14395677482153	0.431	0.864	1.77e-93
MCM7	1.56e-98	-113377582953914	0.747	0.936	2.46e-93
PRDX6	3.47e-97	-100863809192555	0.381	0.801	5.46e-93
GAS1	6.28e-97	-107924059330492	0.154	0.706	9.87e-93
MCM3	1.73e-97	-11701273073213	0.264	0.743	2.72e-92
PHGDH	3.29e-96	-121763092537389	0.303	0.84	5.17e-92
BTG1	5.68e-96	-100025282278454	0.859	0.963	8.93e-92
HMGN3	1.7e-95	-102701032362805	0.684	0.934	2.68e-91
HES1	2.01e-96	-1155815946655	0.039	0.626	3.16e-91
CAPN6	5.2e-94	-130116507154621	0.236	0.78	8.18e-90
POU3F3	6.67e-93	-114254314978375	0.712	0.959	1.05e-88
CNN2	3.52e-92	-116052450425941	0.428	0.847	5.53e-90
LRP2	1.3e-90	-120605583632411	0.201	0.707	2.04e-86
DCT	4.43e-90	-161483155303375	0.052	0.608	6.96e-86
IGFBP2	6.23e-90	-133292893442224	0.751	0.985	9.79e-86
CDON	8.2e-89	-107801503525618	0.316	0.753	1.29e-84
TRIM5	7.84e-88	-104336458073446	0.082	0.627	1.23e-83
MCM5	9.83e-87	-123464803627227	0.138	0.648	1.55e-82
SP8	8.75e-86	-109337667358432	0.474	0.864	1.38e-81
MCM6	1.2e-86	-1277668982625	0.247	0.702	1.89e-81
CCNB1IP1	2.41e-83	-111087330936707	0.433	0.808	3.79e-79
NME4	1.5e-81	-10224792437555	0.662	0.897	2.36e-77
EFEMP1	4.42e-80	-103644941733405	0.271	0.741	6.95e-76
CCNG1	5.79e-80	-110843644098546	0.675	0.896	9.11e-76
TYMS	7.43e-80	-115173278936643	0.13	0.633	1.17e-75
LDHB	2.06e-79	-120645487353499	0.82	0.938	3.24e-75
GPC3	9.43e-79	-108757659035916	0.067	0.583	1.48e-74
MCM4	1.15e-69	-12936999552302	0.243	0.653	1.81e-65
LIX1	1.59e-69	-133214355325704	0.046	0.528	2.5e-65
UHRF1	8.23e-67	-102637293384996	0.076	0.545	1.29e-62
RSPO1	8.3e-62	-104762321172417	0.099	0.547	1.3e-57
EDNRB	8.3e-62	-121529562595758	0.028	0.477	1.31e-57
DLL1	7.35e-47	-143202756087043	0.546	0.806	1.15e-42
H1F0	0.000131	-119273085232862	0.567	0.651	2.06

## Sheet: DE_KO_vs_Control
Gene	baseMean	log2FoldChange	lfcSE	stat	pvalue	padj
A1BG	121.505	-0.134746	0.225169	-0.59842	0.54956	0.613778
A1CF	105.395	7.01715	0.776211	9.04026	1.56294e-19	9.40741e-19
A2M	3290.45	8.53066	0.266457	32.0152	6.70047e-225	2.04387e-222
A2ML1	13.2572	-2.55843	0.668183	-3.82894	0.000128697	0.00027534
A3GALT2	2.98565	0.205975	1.53053	0.134578	0.892946	0.914959
A4GALT	78.0624	7.00174	0.946269	7.39932	1.36885e-13	5.9998e-13
A4GNT	1.09938	0.845702	2.32506	0.363733	0.716058	0.763396
AAAS	1463.14	0.572819	0.0966422	5.92722	3.08112e-09	1.00273e-08
AAAS.1	1463.14	0.572819	0.0966422	5.92722	3.08112e-09	1.00273e-08
AACS	842.691	-0.0590675	0.101764	-0.580436	0.561621	0.625038
AADAC	3.8719	5.11746	1.53223	3.33987	0.000838163	0.00161798
AADACL3	0.534978	2.26898	2.82039	0.804494	0.421112	0.489267
AADACL4	0.134877	0.403169	4.08047	0.0988045	0.921294
AADAT	686.817	-0.88601	0.111247	-7.96435	1.66093e-15	8.16714e-15
AAGAB	1033.35	0.583974	0.115624	5.05061	4.40406e-07	1.19728e-06
AAK1	1932.57	-1.62574	0.123409	-13.1736	1.24527e-39	1.62753e-38
AAMDC	191.972	1.25226	0.203027	6.16795	6.91817e-10	2.37245e-09
AAMP	1870.78	0.495995	0.0875766	5.66356	1.48268e-08	4.545e-08
AANAT	5.27453	0.441969	0.990799	0.446073	0.655544	0.70926
AAR2	872.635	0.209757	0.105686	1.98471	0.0471768	0.0696335
AARD	16.2942	1.00785	0.538434	1.87182	0.0612319	0.0882793
AARS2	833.044	0.508039	0.114026	4.45547	8.37079e-06	2.01699e-05
AARSD1	0.48633	0.350907	3.02869	0.115861	0.907763	0.92632
AASDH	500.894	0.107725	0.132384	0.813728	0.415801	0.484484
AASDHPPT	2432.54	-0.741977	0.10707	-6.92981	4.214e-12	1.67527e-11
AASS	2161.52	0.0193495	0.120126	0.161076	0.872033	0.896748
AATF	854.915	0.350705	0.113553	3.08845	0.00201201	0.00370057
AATF.1	854.915	0.350705	0.113553	3.08845	0.00201201	0.00370057
AATK	341.208	-0.800474	0.159985	-5.00343	5.63181e-07	1.51707e-06
ABAT	4393.3	-2.33019	0.167183	-13.9379	3.72619e-44	5.7024e-43
ABCA1	1320.28	0.294609	0.119811	2.45895	0.0139343	0.022619
ABCA10	30.9962	-1.72741	0.390215	-4.42681	9.5637e-06	2.29613e-05
ABCA12	15.3445	-1.27821	0.55684	-2.29547	0.0217059	0.0340369
ABCA13	15.5797	-0.0887302	0.512273	-0.173209	0.862487	0.888861
ABCA2	1904.2	-0.56961	0.164317	-3.46652	0.000527239	0.00104467
ABCA3	1631.57	-2.20091	0.386788	-5.69023	1.26866e-08	3.90893e-08
ABCA4	56.4735	1.17206	0.331959	3.53074	0.000414396	0.000833842
ABCA5	453.522	-1.15703	0.136592	-8.47076	2.43803e-17	1.31882e-16
ABCA6	4.11995	-0.467721	1.11938	-0.417837	0.676066	0.727397
ABCA7	419.911	0.0631561	0.167299	0.377505	0.705798	0.754291
ABCA8	50.1585	5.34796	0.696003	7.68382	1.54408e-14	7.15837e-14
ABCA9	15.7517	1.41386	0.709155	1.99372	0.0461828	0.0682671
ABCB1	14.5366	-1.26865	0.542154	-2.34001	0.019283	0.0305409
ABCB10	575.074	-0.11256	0.123905	-0.908439	0.363646	0.432129
ABCB11	10.9628	-0.841918	0.627782	-1.3411	0.179888	0.233623
ABCB11.1	10.9628	-0.841918	0.627782	-1.3411	0.179888	0.233623
ABCB4	36.5916	1.25577	0.418542	3.00033	0.00269687	0.00487746
ABCB5	3.70905	-0.599649	1.23271	-0.486447	0.62665	0.683629
ABCB6	517.085	-0.176714	0.124452	-1.41994	0.155625	0.205141
ABCB7	582.683	0.58597	0.117815	4.97365	6.57035e-07	1.76269e-06
ABCB8	637.649	-0.408617	0.128784	-3.17288	0.00150935	0.00281635
ABCB9	282.414	-1.24195	0.170489	-7.28465	3.22508e-13	1.37899e-12
ABCC1	1135.59	1.13678	0.136393	8.33462	7.77507e-17	4.10828e-16
ABCC1.1	1135.59	1.13678	0.136393	8.33462	7.77507e-17	4.10828e-16
ABCC10	532.256	0.120415	0.136645	0.881224	0.378197	0.446849
ABCC11	5.92721	-1.35161	0.940569	-1.43701	0.150715	0.199223
ABCC12	0.864888	1.61787	2.54333	0.636121	0.524698	0.589339
ABCC2	487.248	5.45258	0.280548	19.4355	3.86971e-84	1.5442e-82
ABCC3	43.1225	6.72354	1.07077	6.27918	3.4037e-10	1.19246e-09
ABCC4	341.116	0.411108	0.1394	2.94912	0.00318681	0.00570677
ABCC5	1732.25	-0.384936	0.106239	-3.6233	0.000290868	0.00059567
ABCC6	124.536	4.0101	0.323145	12.4096	2.31753e-35	2.60842e-34
ABCC6.1	124.536	4.0101	0.323145	12.4096	2.31753e-35	2.60842e-34
ABCC8	86.7764	-1.13093	0.340382	-3.32253	0.00089205	0.0017163
ABCC9	31.4149	1.20606	0.485757	2.48284	0.0130341	0.0212667
ABCD1	216.95	0.971668	0.17726	5.48158	4.21537e-08	1.24306e-07
ABCD2	99.5415	-4.60355	0.368465	-12.4938	8.06572e-36	9.29314e-35
ABCD3	1402.79	-0.780383	0.0949089	-8.22244	1.99405e-16	1.03421e-15
ABCD4	1236.17	0.23923	0.125979	1.89897	0.0575688	0.0834058
ABCE1	2095.79	0.397777	0.105066	3.78597	0.000153109	0.000324673
ABCF1	2318.45	0.156114	0.0848083	1.84079	0.0656525	0.0939302
ABCF1.1	2318.45	0.156114	0.0848083	1.84079	0.0656525	0.0939302
ABCF1.2	2318.45	0.156114	0.0848083	1.84079	0.0656525	0.0939302
ABCF1.3	2318.45	0.156114	0.0848083	1.84079	0.0656525	0.0939302
ABCF1.4	2318.45	0.156114	0.0848083	1.84079	0.0656525	0.0939302
ABCF1.5	2318.45	0.156114	0.0848083	1.84079	0.0656525	0.0939302
ABCF1.6	2318.45	0.156114	0.0848083	1.84079	0.0656525	0.0939302
ABCF2	1333.75	0.141961	0.100471	1.41294	0.157672	0.207489
ABCF3	838.732	-0.0677477	0.103347	-0.655537	0.512122	0.577594
ABCG1	235.133	-0.288992	0.17394	-1.66145	0.0966232	0.133794
ABCG2	76.975	6.97981	0.86412	8.07736	6.61836e-16	3.3327e-15
ABCG4	132.092	-1.87785	0.226402	-8.29434	1.09191e-16	5.7359e-16
ABCG5	16.3048	0.229397	0.540481	0.424431	0.671251	0.723408
ABCG8	3.05632	2.71313	1.44377	1.8792	0.0602178	0.0869566
ABHD1	7.00764	-0.649196	0.791655	-0.820049	0.412188	0.480721
ABHD10	1008.1	-0.450175	0.109378	-4.11576	3.85902e-05	8.74695e-05
ABHD11	181.929	0.0184908	0.185317	0.0997791	0.92052	0.937024
ABHD12	778.527	-0.165929	0.111612	-1.48666	0.137105	0.183278
ABHD12B	40.7844	4.80493	0.74744	6.42852	1.28852e-10	4.63234e-10
ABHD13	473.28	0.265876	0.122517	2.17012	0.0299981	0.0458705
ABHD14A	225.031	-0.411408	0.161497	-2.54747	0.0108508	0.0179404
ABHD14B	237.361	1.76607	0.168846	10.4596	1.324e-25	1.04738e-24
ABHD15	143.414	0.500382	0.19063	2.62488	0.00866796	0.0145547
ABHD16A	913.819	0.0349879	0.11538	0.30324	0.761707	0.804227
ABHD16A.1	913.819	0.0349879	0.11538	0.30324	0.761707	0.804227
ABHD16A.2	913.819	0.0349879	0.11538	0.30324	0.761707	0.804227
ABHD16A.3	913.819	0.0349879	0.11538	0.30324	0.761707	0.804227
ABHD16A.4	913.819	0.0349879	0.11538	0.30324	0.761707	0.804227
ABHD16A.5	913.819	0.0349879	0.11538	0.30324	0.761707	0.804227
ABHD16A.6	913.819	0.0349879	0.11538	0.30324	0.761707	0.804227
ABHD16B	122.94	0.337226	0.238097	1.41634	0.156677	0.20627
ABHD17A	880.706	0.908058	0.119049	7.62759	2.39185e-14	1.09338e-13
ABHD17B	668.74	-0.139136	0.124204	-1.12022	0.26262	0.326272
ABHD17C	656.678	-1.42297	0.13099	-10.8632	1.72559e-27	1.47112e-26
ABHD2	2117.41	-0.582153	0.124635	-4.67088	2.99917e-06	7.55649e-06
ABHD3	348.063	-0.577999	0.152498	-3.7902	0.000150524	0.000319568
ABHD4	806.314	0.834644	0.113036	7.38389	1.53734e-13	6.70564e-13
ABHD5	396.805	-0.740972	0.127384	-5.81683	5.99749e-09	1.90398e-08
ABHD6	368.22	-0.692657	0.141842	-4.88331	1.04318e-06	2.74476e-06
ABHD8	490.552	-0.723258	0.120756	-5.98943	2.1058e-09	6.93851e-09
ABI1	1109.33	-0.480716	0.114547	-4.19666	2.70876e-05	6.24355e-05
ABI2	5683.02	-1.07154	0.087926	-12.1869	3.65071e-34	3.94132e-33
ABI3	6.20951	3.86497	1.27728	3.02593	0.00247868	0.00450867
ABI3BP	195.753	2.52911	0.245411	10.3056	6.64595e-25	5.0681e-24
ABL1	4101.66	0.0640037	0.109814	0.582835	0.560004	0.62347
ABL2	1231.11	-0.452538	0.122598	-3.69125	0.000223158	0.000463441
ABLIM1	1417.47	1.61129	0.144784	11.129	9.06863e-29	8.05568e-28
ABLIM2	185.795	-3.09327	0.288792	-10.7111	9.033e-27	7.5054e-26
ABLIM3	779.174	-3.88666	0.176677	-21.9986	2.96727e-107	1.6846e-105
ABO	60.6635	9.08777	1.2205	7.44593	9.6267e-14	4.25575e-13
ABO.1	60.6635	9.08777	1.2205	7.44593	9.6267e-14	4.25575e-13
ABR	4166.21	-0.930876	0.116998	-7.95633	1.77218e-15	8.69044e-15
ABR.1	4166.21	-0.930876	0.116998	-7.95633	1.77218e-15	8.69044e-15
ABR.2	4166.21	-0.930876	0.116998	-7.95633	1.77218e-15	8.69044e-15
ABRACL	548.085	0.0629624	0.132854	0.473921	0.635556	0.691375
ABT1	632.297	0.783308	0.127316	6.15249	7.62744e-10	2.60427e-09
ABT1.1	632.297	0.783308	0.127316	6.15249	7.62744e-10	2.60427e-09
ABTB1	203.033	0.228247	0.165704	1.37744	0.168377	0.220448
ABTB2	533.892	-1.87484	0.148758	-12.6033	2.02434e-36	2.36418e-35
ACAA1	947.256	0.877622	0.116731	7.51836	5.54674e-14	2.49277e-13
ACAA2	1366.21	0.96172	0.0971514	9.89919	4.19672e-23	2.96073e-22
ACACA	3705.01	-0.0559901	0.122109	-0.458526	0.646575	0.700862
ACACA.1	3705.01	-0.0559901	0.122109	-0.458526	0.646575	0.700862
ACACB	397.466	-0.0701589	0.171799	-0.408379	0.682996	0.733847
ACAD10	599.485	0.0664644	0.127711	0.520428	0.602765	0.662229
ACAD11	25.0983	0.510657	0.481313	1.06097	0.288705	0.354156
ACAD8	583.747	-0.228799	0.118261	-1.93469	0.0530281	0.0773502
ACAD9	861.143	0.30129	0.102635	2.93554	0.00332969	0.00594252
ACADL	16.7066	-1.25517	0.523793	-2.39631	0.0165612	0.026517
ACADM	1289.59	-0.330942	0.0994499	-3.32773	0.000875578	0.00168514
ACADS	191.031	1.46603	0.179851	8.15135	3.59883e-16	1.84105e-15
ACADSB	794.249	0.64719	0.113197	5.71738	1.08176e-08	3.352e-08
ACADVL	2660.34	0.951621	0.0864164	11.0121	3.34304e-28	2.91213e-27
ACAN	91.7783	8.72329	1.20499	7.23929	4.51033e-13	1.91309e-12
ACAP1	83.3321	-0.313345	0.255198	-1.22785	0.219502	0.278785
ACAP1.1	83.3321	-0.313345	0.255198	-1.22785	0.219502	0.278785
ACAP2	1353.93	-0.0769144	0.149597	-0.514143	0.607152	0.665991
ACAP3	2006.28	-0.608159	0.168051	-3.6189	0.000295859	0.000605065
ACAT1	770.401	-0.422996	0.119408	-3.54244	0.000396444	0.000800134
ACAT2	1425.12	0.139145	0.109947	1.26556	0.205672	0.262969
ACBD3	1221.77	0.0755286	0.100999	0.747816	0.454571	0.52121
ACBD4	150.386	-0.277082	0.19488	-1.4218	0.155083	0.204501
ACBD5	942.789	-0.834005	0.0960595	-8.68217	3.88293e-18	2.17427e-17
ACBD6	1050.66	-0.340936	0.101569	-3.35671	0.00078876	0.00153
ACBD7	614.67	-1.24379	0.136924	-9.08387	1.04786e-19	6.34961e-19
ACCS	43.3507	6.73185	1.06371	6.32867	2.47291e-10	8.7299e-10
ACCSL	1.03785	-0.588717	2.16291	-0.272187	0.785478	0.824367
ACD	570.9	-0.582824	0.145437	-4.00739	6.13928e-05	0.000136237
ACE	94.314	2.01007	0.262861	7.64688	2.05914e-14	9.46815e-14
ACE2	11.0105	0.620454	0.800628	0.774959	0.438364	0.506402
ACER1	0.663543	-0.633195	2.76133	-0.229308	0.81863	0.852647
ACER2	100.206	-0.174732	0.244846	-0.713641	0.475449	0.542144
ACER3	480.007	-0.571486	0.127526	-4.48132	7.41811e-06	1.79634e-05
ACHE	256.605	-0.606964	0.231912	-2.61722	0.00886499	0.0148661
ACIN1	7399.91	-0.162725	0.0860815	-1.89036	0.05871	0.0849291
ACKR2	5.12667	2.03787	1.04786	1.94479	0.0518003	0.0757989
ACKR3	475.657	2.0018	0.135208	14.8053	1.35288e-49	2.37539e-48
ACKR4	5.36573	1.21506	0.91174	1.33268	0.182637	0.236827
ACLY	6856.44	-0.127324	0.099807	-1.2757	0.202061	0.258863
ACMSD	10.8898	2.74205	0.766441	3.57764	0.000346711	0.00070458
ACO1	1117.44	0.72553	0.0939608	7.72163	1.14854e-14	5.36333e-14
ACO2	2126.72	-0.646611	0.110344	-5.85995	4.62993e-09	1.48054e-08
ACOT1	35.666	5.10449	0.73033	6.98929	2.76284e-12	1.11212e-11
ACOT11	28.2391	3.06827	0.529529	5.79434	6.85885e-09	2.16597e-08
ACOT12	8.16743	-2.13199	0.829446	-2.57038	0.0101587	0.016883
ACOT13	561.1	0.581988	0.134752	4.31896	1.56764e-05	3.69714e-05
ACOT2	51.6378	1.2502	0.35319	3.53973	0.000400537	0.000807671
ACOT4	11.0537	1.27312	0.655241	1.94298	0.052019	0.0760879
ACOT6	0.717225	1.26194	2.62756	0.480271	0.631035	0.687329
ACOT7	1515.68	-0.908032	0.168342	-5.39396	6.89223e-08	2.00516e-07
ACOT8	236.866	0.065691	0.153699	0.427401	0.669088	0.721354
ACOT9	256.442	1.23168	0.156896	7.8503	4.1504e-15	1.98921e-14
ACOX1	1264.83	-1.34951	0.0928669	-14.5316	7.63678e-48	1.28208e-46
ACOX2	89.6752	3.04278	0.30131	10.0985	5.60967e-24	4.11649e-23
ACOX3	373.29	-0.501029	0.129204	-3.87781	0.000105403	0.00022745
ACOXL	8.45679	0.836755	0.752062	1.11262	0.265874	0.329631
ACP1	2544.63	0.352176	0.110131	3.1978	0.00138481	0.00259852
ACP2	834.231	0.24659	0.110544	2.23069	0.0257016	0.0397416
ACP5	19.1024	3.89098	0.738783	5.26675	1.38861e-07	3.92753e-07
ACP6	206.396	1.16546	0.172515	6.75567	1.42176e-11	5.46507e-11
ACR	3.68435	2.35893	1.28266	1.83909	0.065902	0.0942571
ACR.1	3.68435	2.35893	1.28266	1.83909	0.065902	0.0942571
ACRBP	48.0559	-0.781354	0.327215	-2.38789	0.0169453	0.0270816
ACRV1	17.3005	0.328288	0.490731	0.668977	0.50351	0.569451
ACSBG1	58.9412	-2.53756	0.324658	-7.81608	5.44954e-15	2.59459e-14
ACSBG2	21.2382	-0.403086	0.457558	-0.88095	0.378345	0.446981
ACSF2	662.414	2.62559	0.150349	17.4634	2.72447e-68	7.56671e-67
ACSF3	412.947	0.144348	0.163904	0.880691	0.378485	0.447043
ACSL1	644.446	-0.627443	0.114133	-5.49746	3.85292e-08	1.1416e-07
ACSL3	1941.57	-0.364091	0.0890433	-4.08891	4.33397e-05	9.75958e-05
ACSL4	1826.42	0.271758	0.0940144	2.8906	0.0038451	0.00680636
ACSL5	140.211	3.04809	0.250788	12.154	5.46137e-34	5.85398e-33
ACSL6	609.35	-4.54181	0.243068	-18.6854	6.51452e-78	2.28988e-76
ACSM1	13.3164	3.07009	0.882671	3.47819	0.000504821	0.00100478
ACSM2A	12.4955	6.81153	1.29499	5.2599	1.44133e-07	4.0728e-07
ACSM2B	11.2535	6.65844	1.31065	5.08027	3.7689e-07	1.03083e-06
ACSM3	79.6144	5.12575	0.511104	10.0288	1.13932e-23	8.25457e-23
ACSM4	4.08184	0.620499	1.07412	0.577679	0.563481	0.626759
ACSM5	0.684583	-0.554693	2.7413	-0.202347	0.839646	0.870205
ACSS1	245.739	-0.0264217	0.189601	-0.139354	0.889171	0.911662
ACSS2	1199.13	1.48369	0.114968	12.9053	4.20266e-38	5.2488e-37
ACSS3	232.996	3.03094	0.195883	15.4732	5.26058e-54	1.03019e-52
ACTA1	17.1272	0.651219	0.613099	1.06218	0.288155	0.35365
ACTA2	285.519	2.58811	0.186662	13.8652	1.0292e-43	1.5539e-42
ACTB	69564.8	-0.513116	0.108241	-4.74051	2.13183e-06	5.44361e-06
ACTBL2	0
ACTC1	58.4355	3.12775	0.549669	5.69025	1.26852e-08	3.90893e-08
ACTG1	85961.3	-0.355988	0.0973882	-3.65535	0.000256829	0.000529819
ACTG1.1	85961.3	-0.355988	0.0973882	-3.65535	0.000256829	0.000529819
ACTG2	10.0139	3.14822	0.919248	3.42478	0.000615304	0.00121089
ACTL10	8.05361	1.59529	0.784345	2.03392	0.0419598	0.0625022
ACTL6A	1439.65	0.764941	0.106199	7.2029	5.89455e-13	2.48616e-12
ACTL6B	942.356	-3.77609	0.440566	-8.571	1.02592e-17	5.62569e-17
ACTL7A	0
ACTL7B	0.244183	1.15671	4.0516	0.285495	0.775265
ACTL8	1.36871	-1.27896	2.23002	-0.573519	0.566293	0.62883
ACTL9	0
ACTN1	1888.48	1.18785	0.105371	11.273	1.78412e-29	1.62577e-28
ACTN2	120.011	-1.84382	0.22999	-8.01697	1.08383e-15	5.39128e-15
ACTN3	42.037	4.64838	0.598897	7.76156	8.38887e-15	3.94911e-14
ACTN4	3817.24	1.10645	0.1062	10.4186	2.04e-25	1.59695e-24
ACTN4.1	3817.24	1.10645	0.1062	10.4186	2.04e-25	1.59695e-24
ACTR10	1496.37	-0.342042	0.113234	-3.02067	0.00252213	0.00457892
ACTR1A	4693.5	-0.796708	0.095545	-8.33856	7.51995e-17	3.98049e-16
ACTR1B	1584.91	0.308916	0.0927783	3.32961	0.000869672	0.00167449
ACTR1B.1	1584.91	0.308916	0.0927783	3.32961	0.000869672	0.00167449
ACTR2	5420.65	0.091721	0.0838402	1.094	0.273956	0.338602
ACTR3	3546.11	-0.498258	0.0909591	-5.47782	4.30593e-08	1.26956e-07
ACTR3B	938.228	-1.77267	0.107227	-16.5319	2.16292e-61	5.08837e-60
ACTR3C	0.794016	-3.39669	2.84112	-1.19555	0.231874	0.292139
ACTR5	336.101	-0.0311839	0.135756	-0.229705	0.818321	0.852374
ACTR6	642.579	-0.577152	0.12946	-4.45816	8.26666e-06	1.99324e-05
ACTR8	840.191	-0.314239	0.112603	-2.79068	0.00525982	0.0090959
ACTRT1	0.416642	-2.45705	4.0342	-0.609054	0.542489
ACTRT2	0
ACTRT3	9.78279	0.775788	0.689513	1.12512	0.260536	0.324086
ACVR1	481.07	-0.027287	0.128565	-0.212242	0.831918	0.864136
ACVR1B	2132.91	-0.573081	0.0966507	-5.9294	3.04037e-09	9.90542e-09
ACVR1C	30.9186	0.956511	0.391889	2.44077	0.014656	0.023707
ACVR2A	1879	-1.36386	0.0979632	-13.9222	4.6445e-44	7.08365e-43
ACVR2B	4292.59	-0.631171	0.108979	-5.79168	6.96868e-09	2.19873e-08
ACVRL1	44.8624	8.6517	1.24747	6.93538	4.05133e-12	1.61238e-11
ACY1	6.19538	1.26005	0.847305	1.48712	0.136983	0.183129
ACY3	9.09383	5.35654	1.33029	4.02661	5.65874e-05	0.000125962
ACYP1	367.643	-1.62069	0.153182	-10.5801	3.68437e-26	2.99492e-25
ACYP2	115.766	-0.564612	0.220026	-2.56611	0.0102846	0.0170748
ADA	206.787	0.951058	0.197281	4.82082	1.42967e-06	3.71924e-06
ADAD1	0.256969	1.21976	4.04552	0.30151	0.763026
ADAD2	2.61388	3.46361	1.70559	2.03074	0.0422813	0.0629417
ADAL	370.574	-0.556886	0.13441	-4.14319	3.42506e-05	7.80757e-05
ADAM10	2769.4	0.559761	0.0929224	6.02396	1.70198e-09	5.63892e-09
ADAM11	1067.08	2.30005	0.398218	5.77585	7.65652e-09	2.40269e-08
ADAM12	558.021	5.07465	0.233546	21.7287	1.09854e-104	5.84922e-103
ADAM15	747.456	0.419668	0.113796	3.68791	0.000226104	0.000469343
ADAM17	986.921	0.0104445	0.115996	0.0900422	0.928254	0.943206
ADAM18	0.134877	0.403169	4.08047	0.0988045	0.921294
ADAM18.1	0.134877	0.403169	4.08047	0.0988045	0.921294
ADAM19	700.517	0.264734	0.121727	2.17482	0.0296434	0.0453727
ADAM2	0
ADAM2.1	0
ADAM20	2.73702	-0.528114	1.21675	-0.434036	0.664262	0.717011
ADAM21	6.25643	-1.0727	0.84397	-1.27102	0.203721	0.260748
ADAM22	1228.16	-1.96703	0.137328	-14.3236	1.55873e-46	2.53181e-45
ADAM23	1242.27	-2.15175	0.110457	-19.4804	1.61012e-84	6.49718e-83
ADAM28	6.94765	4.96147	1.38017	3.59483	0.000324599	0.000661436
ADAM29	1.88105	-2.65378	1.79838	-1.47565	0.140038	0.186658
ADAM30	0
ADAM32	6.59585	-0.279009	0.764499	-0.364957	0.715144	0.762512
ADAM32.1	6.59585	-0.279009	0.764499	-0.364957	0.715144	0.762512
ADAM33	418.591	10.0172	1.03285	9.69855	3.05799e-22	2.07209e-21
ADAM7	0.589844	2.39358	3.19942	0.74813	0.454382	0.521134
ADAM8	85.9908	0.305106	0.234613	1.30047	0.193441	0.249077
ADAM9	1386.71	0.345781	0.108777	3.17881	0.00147883	0.00276371
ADAM9.1	1386.71	0.345781	0.108777	3.17881	0.00147883	0.00276371
ADAMDEC1	0.122092	0.403169	4.08047	0.0988045	0.921294
ADAMTS1	1682.53	5.41027	0.191989	28.1801	1.0265e-174	1.84739e-172
ADAMTS10	1158.97	-0.309593	0.121198	-2.55444	0.0106358	0.017627
ADAMTS12	332.376	2.78511	0.20847	13.3598	1.0389e-40	1.41111e-39
ADAMTS12.1	332.376	2.78511	0.20847	13.3598	1.0389e-40	1.41111e-39
ADAMTS13	299.383	0.455729	0.176903	2.57614	0.00999091	0.0166296
ADAMTS13.1	299.383	0.455729	0.176903	2.57614	0.00999091	0.0166296
ADAMTS14	26.3489	7.88394	1.24598	6.32748	2.49203e-10	8.79565e-10
ADAMTS15	807.859	4.76091	0.206247	23.0836	6.77202e-118	4.43185e-116
ADAMTS16	27.8981	1.6873	0.466861	3.61413	0.000301353	0.000616091
ADAMTS17	88.9569	3.76874	0.367989	10.2414	1.29289e-24	9.73156e-24
ADAMTS18	599.866	6.47771	0.314308	20.6094	2.25795e-94	1.04733e-92
ADAMTS19	482.759	7.04566	0.362013	19.4625	2.2858e-84	9.14169e-83
ADAMTS2	400.904	3.19473	0.199001	16.0538	5.37297e-58	1.15528e-56
ADAMTS20	74.7475	4.13356	0.392516	10.531	6.22027e-26	5.0043e-25
ADAMTS3	501.197	1.21074	0.149256	8.11186	4.9851e-16	2.52439e-15
ADAMTS4	94.102	3.58501	0.341183	10.5076	7.96931e-26	6.39143e-25
ADAMTS5	147.116	1.36315	0.240238	5.67416	1.3937e-08	4.27808e-08
ADAMTS6	210.692	0.859293	0.262126	3.27816	0.00104484	0.00199618
ADAMTS7	1255.19	0.31463	0.129137	2.43641	0.014834	0.0239736
ADAMTS8	276.997	5.81151	0.388918	14.9428	1.73585e-50	3.14287e-49
ADAMTS9	2821.84	5.38583	0.17235	31.2493	2.2831e-214	6.42015e-212
ADAMTSL1	213.555	1.31158	0.284896	4.6037	4.15051e-06	1.0303e-05
ADAMTSL2	25.4683	1.56333	0.439545	3.55669	0.000375553	0.000760187
ADAMTSL3	227.593	4.80432	0.291022	16.5084	3.18992e-61	7.47514e-60
ADAMTSL3.1	227.593	4.80432	0.291022	16.5084	3.18992e-61	7.47514e-60
ADAMTSL4	210.456	3.79828	0.254374	14.9319	2.04488e-50	3.68754e-49
ADAMTSL5	34.7466	2.76813	0.465529	5.94619	2.74451e-09	8.97564e-09
ADAP1	293.576	-0.929424	0.19234	-4.83219	1.35042e-06	3.51971e-06
ADAP2	9.10057	1.45438	0.82517	1.76252	0.0779819	0.109962
ADAR	8292.68	-0.184667	0.1123	-1.6444	0.100094	0.138133
ADARB1	935.478	-0.0486528	0.120785	-0.402805	0.687091	0.737676
ADARB2	237.199	-1.97695	0.165377	-11.9542	6.1698e-33	6.43325e-32
ADAT1	414.441	0.40854	0.143303	2.85088	0.00435987	0.00764315
ADAT2	274.895	0.773644	0.170629	4.53407	5.78568e-06	1.41647e-05
ADAT3	67.3703	1.02969	0.292149	3.52454	0.000424212	0.000852831
ADCK1	213.151	-0.460513	0.155916	-2.95359	0.00314103	0.00563634
ADCK2	356.451	-0.693289	0.132989	-5.21312	1.85688e-07	5.18917e-07
ADCK5	171.177	0.547465	0.18978	2.88473	0.00391743	0.00692011
ADCK5.1	171.177	0.547465	0.18978	2.88473	0.00391743	0.00692011
ADCY1	2168.36	-3.01174	0.122565	-24.5727	2.47648e-133	2.14275e-131
ADCY10	15.6499	1.16674	0.569796	2.04765	0.0405944	0.0606641
ADCY2	659.693	-0.866611	0.154592	-5.60579	2.07306e-08	6.2958e-08
ADCY3	532.556	-0.222318	0.160236	-1.38744	0.165308	0.216793
ADCY4	7.80018	4.19699	1.20946	3.47012	0.000520224	0.00103225
ADCY4.1	7.80018	4.19699	1.20946	3.47012	0.000520224	0.00103225
ADCY5	774.91	-1.37828	0.138394	-9.9591	2.30141e-23	1.64163e-22
ADCY6	2093.78	0.246405	0.112685	2.18668	0.028766	0.0441122
ADCY7	482.133	0.919435	0.158647	5.79546	6.81338e-09	2.15217e-08
ADCY8	77.3212	-0.821105	0.298028	-2.75513	0.00586693	0.0100963
ADCY9	649.845	-0.960157	0.147762	-6.498	8.13968e-11	2.96478e-10
ADCYAP1	209.903	4.6481	0.373204	12.4546	1.32057e-35	1.50706e-34
ADCYAP1R1	1510.42	-1.91254	0.192073	-9.95739	2.34123e-23	1.66938e-22
ADD1	6770.28	-0.711651	0.0818273	-8.69698	3.4082e-18	1.9138e-17
ADD2	2542.08	-1.9471	0.171754	-11.3366	8.64588e-30	8.00411e-29
ADD3	2407.03	0.83797	0.104841	7.9928	1.31906e-15	6.52175e-15
ADGB	1.09928	0.731697	2.10354	0.347841	0.72796	0.774388
ADH1A	1.50197	0.556618	1.96229	0.283657	0.776673	0.816555
ADH1B	0.839317	1.57039	2.50562	0.626745	0.530827	0.595443
ADH4	59.5167	5.17005	0.572588	9.02926	1.72843e-19	1.03792e-18
ADH5	4069.61	0.802786	0.103813	7.733	1.05043e-14	4.91156e-14
ADH6	17.0994	-0.729957	0.522365	-1.39741	0.162291	0.213038
ADH7	0.155917	0.403169	4.08047	0.0988045	0.921294
ADHFE1	169.327	-0.319489	0.178554	-1.78931	0.0735648	0.104158
ADI1	706.856	0.321045	0.118103	2.71835	0.00656077	0.0112131
ADI1.1	706.856	0.321045	0.118103	2.71835	0.00656077	0.0112131
ADIPOQ	0.488367	2.14612	3.98042	0.539169	0.58977	0.650533
ADIPOR1	1483.53	0.142443	0.0949008	1.50097	0.133363	0.178634
ADIPOR2	1713.52	0.25861	0.0920753	2.80868	0.00497456	0.00863244
ADIPOR2.1	1713.52	0.25861	0.0920753	2.80868	0.00497456	0.00863244
ADIRF	6.84367	3.99274	1.27108	3.14123	0.00168239	0.00312628
ADK	536.527	0.212996	0.122771	1.73491	0.0827563	0.116067
ADM	38.9459	2.38378	0.461234	5.16826	2.36288e-07	6.55739e-07
ADM2	93.6362	3.05752	0.309964	9.86411	5.95604e-23	4.17247e-22
ADM5	51.2372	-0.20434	0.362154	-0.564235	0.572594	0.634465
ADNP	5864.79	-0.374298	0.0997976	-3.75057	0.000176433	0.000371811
ADNP2	1604.77	-0.0439164	0.0920523	-0.477081	0.633305	0.689342
ADO	1097.53	-0.0215192	0.102925	-0.209076	0.834389	0.866064
ADORA1	164.359	-1.99586	0.250266	-7.97492	1.52478e-15	7.5141e-15
ADORA2A	10.6079	-0.677877	0.681899	-0.994101	0.320174	0.386437
ADORA2B	82.179	-0.750812	0.24992	-3.00421	0.00266276	0.00482158
ADORA3	6.09532	3.83554	1.34637	2.84881	0.00438834	0.00768857
ADPGK	750.016	0.699587	0.118723	5.89258	3.80201e-09	1.22515e-08
ADPRH	25.2327	2.78956	0.614361	4.54059	5.60967e-06	1.37431e-05
ADPRHL1	109.015	1.09734	0.303943	3.61034	0.0003058	0.000624756
ADPRM	178.581	0.183534	0.200265	0.916456	0.359428	0.427706
ADRA1A	73.9267	-3.18364	0.358808	-8.87281	7.13241e-19	4.14338e-18
ADRA1B	55.7006	-0.913552	0.296672	-3.07933	0.00207467	0.00380842
ADRA1D	9.2345	3.03329	0.896384	3.38392	0.000714597	0.0013941
ADRA2A	272.757	-2.06064	0.175599	-11.7349	8.44264e-32	8.37147e-31
ADRA2B	33.1685	6.34352	1.0836	5.8541	4.79591e-09	1.53268e-08
ADRA2C	128.288	1.81842	0.283326	6.41812	1.37972e-10	4.95131e-10
ADRB1	5.66512	-0.59615	0.875366	-0.68103	0.495853	0.5627
ADRB2	9.57361	0.873364	0.775783	1.12578	0.260257	0.323783
ADRB3	4.53722	5.34727	1.4932	3.58108	0.000342172	0.000695983
ADRM1	1332.38	0.286348	0.135009	2.12095	0.0339263	0.0514295
ADSL	1285.6	1.01387	0.12008	8.44327	3.08581e-17	1.66323e-16
ADTRP	3.65286	5.03829	1.55977	3.23016	0.00123723	0.00234088
AEBP1	2323.23	2.04478	0.128069	15.9662	2.19799e-57	4.63742e-56
AEBP2	820.711	-0.0335582	0.108223	-0.310084	0.756497	0.799969
AEN	884.639	1.08251	0.133516	8.1077	5.15866e-16	2.60934e-15
AFAP1	2775.89	-1.1831	0.144568	-8.18368	2.75308e-16	1.41523e-15
AFAP1L1	41.6414	3.3902	0.460121	7.36805	1.73138e-13	7.53011e-13
AFAP1L2	1044.28	5.04543	0.198884	25.3687	5.59134e-142	5.52897e-140
AFF1	1228.34	1.01076	0.173462	5.82698	5.64386e-09	1.79488e-08
AFF2	1295.1	-1.20299	0.151629	-7.93375	2.12628e-15	1.03929e-14
AFF3	1042.1	-0.181261	0.203981	-0.888614	0.374211	0.442896
AFF4	4635.74	-0.793821	0.129264	-6.14108	8.19618e-10	2.79104e-09
AFG3L2	1386.14	0.151962	0.089674	1.6946	0.090151	0.125703
AFM	0.501153	2.18451	3.35807	0.650525	0.515353	0.580292
AFMID	375.882	1.46117	0.149897	9.74787	1.88381e-22	1.29105e-21
AFP	72988.1	19.3229	1.18137	16.3563	3.92257e-60	8.95869e-59
AFTPH	882.638	-1.01536	0.10647	-9.5365	1.47732e-21	9.7461e-21
AGA	126.164	0.0542398	0.210162	0.258086	0.796341	0.83392
AGAP1	3120.66	-1.2246	0.116575	-10.5048	8.20652e-26	6.57289e-25
AGAP2	1424.12	-4.30886	0.377691	-11.4084	3.79545e-30	3.56693e-29
AGAP3	2091.42	-0.602361	0.124075	-4.85482	1.20498e-06	3.15525e-06
AGAP4	189.27	0.487434	0.186526	2.61322	0.00896948	0.0150329
AGAP5	81.3826	0.404454	0.259998	1.5556	0.119803	0.162307
AGAP6	370.209	-0.180674	0.132945	-1.35902	0.174141	0.227136
AGAP9	184.443	0.483899	0.173945	2.7819	0.00540409	0.00933373
AGBL1	5.1702	-3.14409	1.16551	-2.69762	0.00698376	0.011892
AGBL2	28.2527	2.84067	0.58017	4.89626	9.76762e-07	2.57527e-06
AGBL2.1	28.2527	2.84067	0.58017	4.89626	9.76762e-07	2.57527e-06
AGBL3	66.6908	-0.419372	0.261259	-1.60519	0.108451	0.148516
AGBL4	30.338	1.18794	0.498252	2.38421	0.0171157	0.0273416
AGBL5	1727.28	0.327467	0.100071	3.27233	0.00106664	0.00203587
AGER	294.243	0.233004	0.153257	1.52034	0.128425	0.172663
AGER.1	294.243	0.233004	0.153257	1.52034	0.128425	0.172663
AGER.2	294.243	0.233004	0.153257	1.52034	0.128425	0.172663
AGER.3	294.243	0.233004	0.153257	1.52034	0.128425	0.172663
AGER.4	294.243	0.233004	0.153257	1.52034	0.128425	0.172663
AGER.5	294.243	0.233004	0.153257	1.52034	0.128425	0.172663
AGER.6	294.243	0.233004	0.153257	1.52034	0.128425	0.172663
AGFG1	1951.93	-0.303317	0.0888799	-3.41266	0.000643329	0.00126314
AGFG2	155.9	0.567414	0.181153	3.13223	0.00173483	0.00321906
AGGF1	1204.93	-0.545333	0.112521	-4.84652	1.25648e-06	3.28532e-06
AGK	851.405	-0.521352	0.101871	-5.11775	3.09195e-07	8.49944e-07
AGK.1	851.405	-0.521352	0.101871	-5.11775	3.09195e-07	8.49944e-07
AGL	1012.37	-0.217155	0.103975	-2.08853	0.03675	0.0553696
AGMAT	81.8045	4.91552	0.456631	10.7648	5.04974e-27	4.22502e-26
AGMO	5.68347	5.67592	1.43011	3.96887	7.22157e-05	0.000159039
AGO1	2896.5	-0.368984	0.12021	-3.0695	0.00214415	0.00392916
AGO2	371.723	0.371883	0.251228	1.48026	0.138804	0.185109
AGO3	269.019	-0.246503	0.180501	-1.36566	0.172046	0.224647
AGO4	2087.14	-1.3805	0.117352	-11.7638	6.00076e-32	5.98645e-31
AGPAT1	2487.89	0.0252279	0.101186	0.249322	0.803112	0.83896
AGPAT1.1	2487.89	0.0252279	0.101186	0.249322	0.803112	0.83896
AGPAT1.2	2487.89	0.0252279	0.101186	0.249322	0.803112	0.83896
AGPAT1.3	2487.89	0.0252279	0.101186	0.249322	0.803112	0.83896
AGPAT1.4	2487.89	0.0252279	0.101186	0.249322	0.803112	0.83896
AGPAT1.5	2487.89	0.0252279	0.101186	0.249322	0.803112	0.83896
AGPAT1.6	2487.89	0.0252279	0.101186	0.249322	0.803112	0.83896
AGPAT2	336.494	2.80193	0.177691	15.7686	5.11823e-56	1.04793e-54
AGPAT3	1401.71	-0.528188	0.117578	-4.49224	7.04774e-06	1.71125e-05
AGPAT4	2434.17	-0.658468	0.100151	-6.57476	4.87321e-11	1.79904e-10
AGPAT5	1531.47	-0.566066	0.0909984	-6.22062	4.95197e-10	1.71122e-09
AGPAT5.1	1531.47	-0.566066	0.0909984	-6.22062	4.95197e-10	1.71122e-09
AGPS	1650.76	0.374088	0.0989929	3.77894	0.0001575	0.000333395
AGR2	23.3008	7.70427	1.31353	5.8653	4.48314e-09	1.43437e-08
AGR3	2.69382	3.50936	1.76937	1.9834	0.0473232	0.0698152
AGRN	6318.22	0.469304	0.150272	3.12303	0.00178999	0.00331152
AGRP	0.947865	3.09149	2.28265	1.35435	0.175626	0.228575
AGT	852.929	11.942	1.18442	10.0825	6.60115e-24	4.83324e-23
AGTPBP1	1858.55	-0.444702	0.12266	-3.62549	0.000288413	0.00059145
AGTR1	203.039	4.45365	0.271479	16.4051	1.75752e-60	4.04995e-59
AGTR2	27.5298	7.94655	1.32658	5.99025	2.09518e-09	6.90478e-09
AGTRAP	284.843	2.34736	0.203054	11.5603	6.54844e-31	6.32594e-30
AGXT	3.72381	5.06913	1.55765	3.25434	0.00113655	0.00216129
AGXT2	55.9294	8.00645	1.20717	6.63243	3.30207e-11	1.2355e-10
AHCTF1	1415.48	0.0841876	0.108817	0.773666	0.439129	0.507155
AHCY	3633.06	1.53163	0.0996788	15.3656	2.78239e-53	5.34985e-52
AHCYL1	3536.64	0.109769	0.0857417	1.28023	0.200465	0.256963
AHCYL2	1372.25	-0.64718	0.0933315	-6.93421	4.08488e-12	1.62501e-11
AHDC1	1995.13	0.291309	0.137763	2.11456	0.0344672	0.0521836
AHI1	569.613	-0.861275	0.129917	-6.62944	3.36972e-11	1.26002e-10
AHNAK	9378.33	5.93112	0.222985	26.5987	7.01954e-156	9.08854e-154
AHNAK2	415.17	-1.55024	0.199282	-7.77911	7.3034e-15	3.45348e-14
AHR	184.675	2.93309	0.208526	14.0658	6.16288e-45	9.64464e-44
AHRR	97.837	1.55672	0.266821	5.83433	5.40057e-09	1.71994e-08
AHSA1	1909.38	0.0495893	0.110893	0.44718	0.654745	0.708523
AHSG	14672.3	10.828	0.256565	42.2037	0	0
AHSP	0.406573	-2.4263	4.0369	-0.60103	0.54782
AICDA	1.39458	3.64244	2.0145	1.80811	0.0705889	0.100299
AIDA	532.652	0.662331	0.1237	5.35432	8.58801e-08	2.47449e-07
AIF1	31.6851	4.05496	0.637025	6.36546	1.94704e-10	6.91413e-10
AIF1.1	31.6851	4.05496	0.637025	6.36546	1.94704e-10	6.91413e-10
AIF1.2	31.6851	4.05496	0.637025	6.36546	1.94704e-10	6.91413e-10
AIF1.3	31.6851	4.05496	0.637025	6.36546	1.94704e-10	6.91413e-10
AIF1.4	31.6851	4.05496	0.637025	6.36546	1.94704e-10	6.91413e-10
AIF1.5	31.6851	4.05496	0.637025	6.36546	1.94704e-10	6.91413e-10
AIF1L	2345.3	0.100281	0.120836	0.829891	0.4066	0.475477
AIFM1	798.812	0.74509	0.108168	6.88828	5.6472e-12	2.2283e-11
AIFM2	73.4399	-0.0693559	0.253874	-0.27319	0.784707	0.823794
AIFM3	36.7067	-0.362075	0.37023	-0.977973	0.328088	0.39456
AIG1	560.936	0.437653	0.12005	3.6456	0.000266772	0.000549263
AIM2	81.1949	-1.62899	0.265122	-6.14431	8.03124e-10	2.7385e-09
AIMP1	936.432	0.224373	0.125514	1.78763	0.0738358	0.104508
AIMP2	253.761	0.601116	0.181675	3.30875	0.000937146	0.0017994
AIP	828.044	0.0396517	0.118159	0.33558	0.737187	0.782446
AIPL1	0.939611	3.0813	2.34277	1.31524	0.18843	0.243339
AIRE	2.62197	2.47408	1.52677	1.62047	0.105131	0.144353
AJAP1	111.047	-2.14215	0.311963	-6.86669	6.57081e-12	2.57636e-11
AJUBA	753.483	2.21199	0.128008	17.28	6.65362e-67	1.78991e-65
AK1	1091.2	-0.590711	0.103624	-5.70053	1.19432e-08	3.69062e-08
AK2	2027.02	0.84266	0.102724	8.20318	2.34119e-16	1.20798e-15
AK3	1711.14	-0.603655	0.0995274	-6.06521	1.31779e-09	4.41561e-09
AK4	884.785	1.19672	0.111645	10.719	8.29003e-27	6.89444e-26
AK5	153.085	-3.0061	0.220425	-13.6377	2.38929e-42	3.42903e-41
AK6	306.032	-0.0430248	0.168474	-0.25538	0.79843	0.835169
AK6.1	306.032	-0.0430248	0.168474	-0.25538	0.79843	0.835169
AK7	64.2061	-0.256787	0.272798	-0.941309	0.346547	0.41402
AK8	28.1341	0.268421	0.395942	0.677929	0.497817	0.564502
AK9	306.466	-1.14836	0.142933	-8.03429	9.41214e-16	4.69225e-15
AKAP1	867.611	-0.336997	0.118241	-2.85008	0.00437081	0.0076603
AKAP10	580.961	0.0106275	0.126925	0.0837307	0.933271	0.947267
AKAP11	2331.82	-0.785665	0.144476	-5.43804	5.38708e-08	1.57696e-07
AKAP12	4453.55	0.129131	0.104671	1.23369	0.217319	0.276403
AKAP13	2895.96	0.181702	0.152723	1.18975	0.234144	0.29447
AKAP14	11.5675	-1.22733	0.663301	-1.85033	0.0642661	0.0922473
AKAP17A	1218.76	0.183697	0.101968	1.80151	0.0716222	0.101631
AKAP17A.1	1218.76	0.183697	0.101968	1.80151	0.0716222	0.101631
AKAP3	35.5104	0.0506029	0.408457	0.123888	0.901404	0.921842
AKAP4	24.0319	7.75528	1.24827	6.21284	5.20355e-10	1.79437e-09
AKAP5	256.025	-1.39598	0.167494	-8.33455	7.77915e-17	4.10923e-16
AKAP6	2247.51	-1.38289	0.22898	-6.03937	1.54722e-09	5.15653e-09
AKAP7	371.999	0.299212	0.183108	1.63407	0.102245	0.140755
AKAP8	803.848	-0.130216	0.115687	-1.12559	0.26034	0.323864
AKAP8L	2370.47	-0.152615	0.0880416	-1.73345	0.0830163	0.116368
AKAP9	3365.03	-0.940123	0.159274	-5.90256	3.57906e-09	1.156e-08
AKIP1	318.189	-0.550733	0.154195	-3.57165	0.000354733	0.000719825
AKIRIN1	2482.97	-0.0966106	0.0997618	-0.968413	0.332838	0.399605
AKIRIN2	1673.99	-0.500449	0.0983281	-5.08958	3.58857e-07	9.82407e-07
AKNA	843.628	0.278433	0.149373	1.86401	0.062321	0.0896842
AKNAD1	3.47132	-1.70162	1.20824	-1.40835	0.159029	0.209122
AKR1A1	1724.83	0.952722	0.0943432	10.0985	5.6108e-24	4.11649e-23
AKR1B1	2284.8	0.411998	0.107944	3.81677	0.000135209	0.000288688
AKR1B10	45.4074	6.80482	1.08616	6.26503	3.72765e-10	1.29962e-09
AKR1B15	36.5837	4.86671	0.696399	6.98839	2.78061e-12	1.11902e-11
AKR1C1	395.965	-0.427213	0.183661	-2.3261	0.0200131	0.0316054
AKR1C2	352.757	-1.91564	0.241152	-7.9437	1.96245e-15	9.6104e-15
AKR1C3	10.4171	-1.17497	0.671913	-1.7487	0.0803429	0.112995
AKR1C4	0.122092	0.403169	4.08047	0.0988045	0.921294
AKR1D1	335.797	11.5591	1.18641	9.74293	1.97762e-22	1.35174e-21
AKR1E2	28.377	1.95467	0.452494	4.31977	1.56189e-05	3.68503e-05
AKR7A2	963.339	0.788684	0.10319	7.64299	2.12235e-14	9.74882e-14
AKR7A3	21.5466	0.141579	0.453757	0.312015	0.755029	0.798558
AKR7L	30.7311	-1.49447	0.415064	-3.60059	0.000317502	0.000647708
AKT1	3681.48	-0.369328	0.0927925	-3.98015	6.8871e-05	0.000151933
AKT1S1	884.949	0.711073	0.10618	6.69684	2.12978e-11	8.10006e-11
AKT2	2448.44	0.237731	0.0929248	2.55831	0.0105181	0.0174433
AKT3	3724.76	-1.57914	0.088163	-17.9116	9.56699e-72	2.9737e-70
AKT3.1	3724.76	-1.57914	0.088163	-17.9116	9.56699e-72	2.9737e-70
AKTIP	362.928	-0.809718	0.150802	-5.36942	7.89882e-08	2.28398e-07
ALAD	938.686	-0.074733	0.100887	-0.740763	0.458837	0.525332
ALAS1	1122.04	-0.511999	0.092902	-5.51117	3.56454e-08	1.0593e-07
ALAS2	32.6831	6.32328	1.09181	5.79156	6.97353e-09	2.1995e-08
ALB	224.995	7.30611	0.574442	12.7186	4.66033e-37	5.5766e-36
ALCAM	1568.75	2.27015	0.166822	13.6082	3.57948e-42	5.12082e-41
ALDH16A1	452.859	1.4397	0.148783	9.6765	3.79477e-22	2.56168e-21
ALDH18A1	2555.82	0.702773	0.0813603	8.63779	5.73101e-18	3.17748e-17
ALDH1A1	449.699	11.9796	1.18685	10.0936	5.89722e-24	4.32311e-23
ALDH1A2	422.606	8.02805	1.08931	7.36981	1.70866e-13	7.43852e-13
ALDH1A3	81.4832	6.32117	0.689014	9.17422	4.54861e-20	2.80251e-19
ALDH1B1	686.63	0.0341498	0.11789	0.289675	0.772065	0.812897
ALDH1L1	121.242	4.35381	0.342041	12.7289	4.08435e-37	4.9004e-36
ALDH1L2	370.733	0.0593028	0.149473	0.396746	0.691555	0.741225
ALDH2	1828.42	0.395577	0.106982	3.69761	0.000217638	0.000452761
ALDH3A1	4.46279	2.16953	1.1854	1.8302	0.0672198	0.0959818
ALDH3A2	1513.48	0.300447	0.0949698	3.16361	0.00155828	0.00290374
ALDH3B1	42.5758	1.01688	0.350383	2.90219	0.00370569	0.00657123
ALDH3B2	7.55997	3.52637	1.07002	3.29561	0.000982088	0.00188128
ALDH4A1	428.618	0.920183	0.168009	5.47699	4.32631e-08	1.27536e-07
ALDH5A1	1117.3	-1.37684	0.124597	-11.0504	2.18352e-28	1.91132e-27
ALDH6A1	1034.86	0.625719	0.102471	6.10632	1.01952e-09	3.45348e-09
ALDH7A1	2375.11	0.248934	0.101925	2.44233	0.014593	0.0236178
ALDH8A1	57.2421	-1.4047	0.290343	-4.83808	1.31098e-06	3.42286e-06
ALDH9A1	1496.56	0.0133824	0.102489	0.130574	0.896113	0.917108
ALDOA	8295.23	1.11663	0.0873568	12.7824	2.05596e-37	2.51025e-36
ALDOB	16.7183	-0.176283	0.51212	-0.344223	0.730678	0.776637
ALDOC	1147.64	3.14579	0.125189	25.1283	2.43901e-139	2.29816e-137
ALG1	197.977	0.6286	0.171577	3.66366	0.000248638	0.000513984
ALG10	143.772	0.161092	0.232071	0.694147	0.48759	0.554337
ALG10B	478.777	-0.157019	0.163952	-0.957713	0.338208	0.405133
ALG11	118.259	1.14461	0.309342	3.70013	0.000215492	0.000448503
ALG12	372.06	0.786477	0.147738	5.32347	1.01808e-07	2.91572e-07
ALG13	795.624	-0.0774757	0.116839	-0.6631	0.507266	0.573087
ALG14	107.523	0.434651	0.224864	1.93295	0.0532429	0.0776306
ALG1L2	1.60569	2.70874	1.94744	1.39093	0.164248	0.215477
ALG2	514.285	0.738946	0.123469	5.98486	2.1657e-09	7.13455e-09
ALG3	448.742	1.44854	0.138917	10.4274	1.85944e-25	1.46196e-24
ALG5	369.035	0.474018	0.160269	2.95764	0.00310002	0.00557019
ALG6	296.46	0.561344	0.155404	3.61215	0.000303664	0.000620534
ALG8	690.862	0.828842	0.13111	6.32171	2.58685e-10	9.11961e-10
ALG9	1246.66	-0.491192	0.101423	-4.84302	1.27881e-06	3.34129e-06
ALK	182.674	-1.86873	0.225257	-8.29598	1.07694e-16	5.65891e-16
ALKBH1	357.994	-0.222525	0.162697	-1.36773	0.171397	0.22393
ALKBH2	333.685	0.412263	0.152289	2.7071	0.00678742	0.0115785
ALKBH3	273.265	0.0214701	0.142437	0.150734	0.880185	0.903994
ALKBH4	274.177	0.024879	0.145203	0.171339	0.863957	0.889968
ALKBH5	2094.15	0.12426	0.083747	1.48376	0.137874	0.184074
ALKBH6	236.266	0.0643891	0.164376	0.391718	0.695266	0.744583
ALKBH7	826.51	0.897937	0.152702	5.88033	4.09444e-09	1.31609e-08
ALKBH8	326.797	-0.161735	0.139917	-1.15594	0.247705	0.309579
ALLC	0.325378	-0.558613	3.98168	-0.140296	0.888426
ALMS1	1748.44	-0.305157	0.137014	-2.2272	0.025934	0.0400699
ALOX12	65.0859	0.806993	0.282806	2.85352	0.00432379	0.00758285
ALOX12B	33.7278	-1.66874	0.418233	-3.98999	6.60768e-05	0.000146145
ALOX15	37.8323	3.74406	0.601562	6.2239	4.84941e-10	1.67707e-09
ALOX15B	144.959	9.38339	1.1912	7.87724	3.34683e-15	1.61569e-14
ALOX5	30.5294	5.20514	0.803441	6.47856	9.26031e-11	3.36275e-10
ALOX5.1	30.5294	5.20514	0.803441	6.47856	9.26031e-11	3.36275e-10
ALOX5AP	3.51743	3.94429	1.54198	2.55794	0.0105294	0.0174605
ALOXE3	23.8841	-4.83604	0.721083	-6.70663	1.99164e-11	7.58434e-11
ALPI	9.33552	6.39169	1.3345	4.78956	1.67144e-06	4.31886e-06
ALPK1	122.186	-0.418853	0.199901	-2.0953	0.0361444	0.054553
ALPK2	529.212	7.09901	0.363361	19.5371	5.31301e-85	2.14872e-83
ALPK3	89.5115	2.59566	0.294171	8.82363	1.10805e-18	6.37108e-18
ALPL	607.159	0.929903	0.271685	3.42272	0.000619968	0.00121954
ALPP	8.79922	4.37925	1.26764	3.45466	0.000550994	0.00108934
ALS2	1492.07	-0.544652	0.0898103	-6.06448	1.32382e-09	4.43335e-09
ALS2CL	77.6071	3.50141	0.426122	8.21691	2.08814e-16	1.08145e-15
ALX1	80.9235	9.50545	1.51464	6.27573	3.48008e-10	1.21803e-09
ALX3	161.681	0.735486	0.205304	3.58242	0.000340422	0.000692502
ALX4	927.089	9.17226	0.82344	11.139	8.10563e-29	7.22521e-28
ALYREF	1173.19	0.18879	0.114504	1.64876	0.0991963	0.136978
AMACR	26.3564	1.8076	0.449344	4.02276	5.75194e-05	0.000127926
AMBN	309.11	-4.72156	0.273919	-17.2371	1.39852e-66	3.71774e-65
AMBP	1129.18	10.4511	0.731071	14.2956	2.33021e-46	3.76453e-45
AMBRA1	1353.93	-0.354467	0.115054	-3.08088	0.00206388	0.00379089
AMD1	1669.97	0.481229	0.0960585	5.00975	5.45014e-07	1.46879e-06
AMDHD1	10.4958	2.7063	0.834191	3.24422	0.00117771	0.00223485
AMDHD2	192.926	1.09734	0.199055	5.51274	3.53289e-08	1.05041e-07
AMELX	0.411608	-2.44083	3.62775	-0.67282	0.501062
AMELY	0
AMER1	734.557	0.328223	0.147887	2.21942	0.0264583	0.0408275
AMER2	1697.09	-2.95871	0.403704	-7.3289	2.32045e-13	1.00219e-12
AMER3	478.051	-3.64098	0.459488	-7.924	2.29988e-15	1.12231e-14
AMFR	1689.6	-0.270737	0.0904573	-2.99298	0.00276265	0.0049924
AMH	243.096	-1.62127	0.166532	-9.7355	2.12772e-22	1.45212e-21
AMHR2	30.456	5.62376	0.913776	6.15442	7.53547e-10	2.57629e-09
AMIGO1	236.63	-0.899775	0.222632	-4.04153	5.31038e-05	0.000118648
AMIGO2	368.152	2.52147	0.173571	14.527	8.17518e-48	1.36991e-46
AMIGO3	176.062	-0.216174	0.182893	-1.18197	0.237216	0.297898
AMMECR1	619.885	-1.40959	0.113066	-12.4671	1.12928e-35	1.29203e-34
AMMECR1L	913.601	-0.34656	0.100172	-3.45965	0.000540882	0.00107052
AMN	143.221	8.47051	1.04077	8.13872	3.99472e-16	2.03836e-15
AMN1	451.398	-1.33361	0.150682	-8.85051	8.71228e-19	5.03678e-18
AMOT	2089.97	1.74457	0.167281	10.4289	1.82906e-25	1.43871e-24
AMOTL1	3303.15	0.783638	0.144661	5.41706	6.05856e-08	1.76863e-07
AMOTL2	1931.12	0.354564	0.0924516	3.83513	0.000125498	0.000268726
AMPD1	0.134877	0.403169	4.08047	0.0988045	0.921294
AMPD2	1522.71	-0.0270335	0.105513	-0.256209	0.797789	0.835131
AMPD3	46.4872	2.37376	0.41388	5.73538	9.7294e-09	3.0247e-08
AMPH	960.244	-1.57759	0.224946	-7.0132	2.32924e-12	9.4222e-12
AMT	341.704	0.710603	0.156898	4.52909	5.92389e-06	1.44972e-05
AMTN	0
AMY1A	0
AMY1B	0
AMY1C	0
AMY2A	0.203287	-1.52038	4.08047	-0.3726	0.709446
AMY2B	205.834	-1.08764	0.179343	-6.0646	1.32279e-09	4.43155e-09
AMZ1	12.2686	-0.760404	0.629046	-1.20882	0.226732	0.286652
AMZ2	1478.46	-0.244648	0.119103	-2.05409	0.0399671	0.0598161
ANAPC1	720.446	0.820271	0.141504	5.79682	6.75858e-09	2.13656e-08
ANAPC10	179.833	0.332199	0.210419	1.57875	0.114393	0.155587
ANAPC11	880.955	0.739358	0.159594	4.63273	3.60876e-06	9.0179e-06
ANAPC13	1319.53	-0.285468	0.119952	-2.37985	0.0173199	0.0276384
ANAPC15	113.005	-0.330279	0.207014	-1.59544	0.110614	0.151072
ANAPC16	1568.59	0.464773	0.141711	3.27972	0.00103912	0.00198567
ANAPC2	736.111	0.36006	0.127884	2.81553	0.00486974	0.00846361
ANAPC4	706.703	-0.0670277	0.134901	-0.496866	0.619283	0.677152
ANAPC5	2218.75	0.220298	0.0960748	2.29299	0.0218489	0.0342462
ANAPC7	1441.21	-0.25211	0.10057	-2.50681	0.0121827	0.0199666
ANG	36.9654	1.37771	0.406958	3.38539	0.000710765	0.00138693
ANGEL1	774.55	0.228256	0.118418	1.92754	0.0539121	0.0784869
ANGEL2	868.938	-0.494622	0.118072	-4.18917	2.79978e-05	6.44178e-05
ANGPT1	190.108	2.30838	0.291901	7.90808	2.61382e-15	1.27e-14
ANGPT2	89.0107	3.37216	0.337206	10.0003	1.5196e-23	1.09437e-22
ANGPT4	5.93565	3.79246	1.33067	2.85004	0.00437136	0.0076603
ANGPTL1	121.327	-4.84713	0.329728	-14.7004	6.40887e-49	1.10163e-47
ANGPTL2	836.356	2.41441	0.12969	18.6167	2.35079e-77	8.16739e-76
ANGPTL3	88.6248	4.38993	0.396543	11.0705	1.74408e-28	1.53262e-27
ANGPTL4	60.8358	3.73823	0.4333	8.62735	6.27917e-18	3.47212e-17
ANGPTL5	2.59087	-5.10258	1.73441	-2.94196	0.00326139	0.00582756
ANGPTL6	19.1782	5.54297	1.11813	4.95734	7.14651e-07	1.91222e-06
ANGPTL7	7.09295	-0.0222114	0.869144	-0.0255554	0.979612	0.984151
ANHX	0
ANK1	281.362	-0.596	0.288909	-2.06293	0.0391194	0.0586497
ANK2	8788.86	-2.21513	0.169307	-13.0835	4.09029e-39	5.24682e-38
ANK3	4811.24	-1.69789	0.114468	-14.8328	8.986e-50	1.5855e-48
ANKAR	59.47	-0.123942	0.292587	-0.423606	0.671853	0.723599
ANKDD1A	237.629	-1.15016	0.161364	-7.12772	1.02045e-12	4.23059e-12
ANKDD1B	18.0008	1.70678	0.53906	3.16621	0.00154439	0.00287905
ANKEF1	172.487	0.337583	0.194095	1.73927	0.0819872	0.115059
ANKFN1	84.6557	-0.323406	0.314872	-1.0271	0.304372	0.370346
ANKFY1	3269.42	-0.603554	0.109839	-5.4949	3.90926e-08	1.15753e-07
ANKH	766.745	-0.810937	0.178815	-4.53505	5.75901e-06	1.41013e-05
ANKHD1	131.906	-0.503735	0.223352	-2.25534	0.0241118	0.0374571
ANKHD1-EIF4EBP3	7.67724	-0.186833	0.800969	-0.233259	0.81556	0.850089
ANKIB1	1873.48	-1.08046	0.0975311	-11.0781	1.60317e-28	1.40949e-27
ANKK1	11.7039	1.95031	0.680804	2.86472	0.00417375	0.0073419
ANKLE1	130.295	-0.501429	0.214673	-2.33578	0.0195025	0.0308613
ANKLE2	1774.14	-0.395318	0.0890553	-4.43901	9.03719e-06	2.17291e-05
ANKMY1	111.041	-0.232136	0.21459	-1.08177	0.279357	0.344331
ANKMY2	1149.17	-0.630593	0.0977627	-6.45024	1.1167e-10	4.03074e-10
ANKRA2	444.676	-0.200213	0.125613	-1.59388	0.110962	0.151482
ANKRD1	28.0245	4.46203	0.754847	5.91117	3.39693e-09	1.09875e-08
ANKRD10	2219.98	-0.2472	0.105966	-2.33283	0.0196568	0.0310892
ANKRD11	3446.94	-0.231058	0.181511	-1.27297	0.203028	0.259916
ANKRD12	1823.02	-1.3852	0.126328	-10.9652	5.61988e-28	4.86957e-27
ANKRD13A	869.955	-0.263146	0.111986	-2.34982	0.0187826	0.0297981
ANKRD13B	1478.44	-1.92022	0.154803	-12.4043	2.47705e-35	2.78447e-34
ANKRD13C	1005.11	-0.678014	0.116333	-5.82824	5.6016e-09	1.78176e-08
ANKRD13D	741.753	-0.897788	0.123311	-7.28069	3.32105e-13	1.41935e-12
ANKRD16	229.825	-0.634427	0.157704	-4.02291	5.74834e-05	0.000127862
ANKRD17	4502.41	-0.396534	0.11753	-3.3739	0.00074112	0.0014421
ANKRD18A	23.999	0.768958	0.431906	1.78038	0.0750132	0.106083
ANKRD18B	54.2748	0.871075	0.379551	2.29501	0.0217323	0.0340724
ANKRD2	0.725479	1.27852	2.65842	0.480934	0.630564	0.68694
ANKRD20A1	1.25092	0.0820817	1.96334	0.0418071	0.966652	0.974433
ANKRD22	6.02832	1.1686	1.11766	1.04558	0.295756	0.361205
ANKRD23	128.422	-0.649472	0.217501	-2.98607	0.00282588	0.00510053
ANKRD24	112.054	-1.31728	0.237367	-5.54954	2.86422e-08	8.59267e-08
ANKRD26	659.9	-0.166912	0.130373	-1.28027	0.200451	0.256963
ANKRD27	729.68	0.156171	0.114852	1.35976	0.173905	0.22686
ANKRD28	1677.73	-0.789042	0.0947444	-8.32811	8.21436e-17	4.3353e-16
ANKRD29	36.1756	-2.39349	0.435391	-5.49734	3.85569e-08	1.14223e-07
ANKRD30A	0.446712	1.99098	3.51591	0.566278	0.571205
ANKRD30B	20.6757	-3.17765	0.586858	-5.41469	6.13948e-08	1.79167e-07
ANKRD30BL	1.82615	-0.947186	1.77691	-0.533052	0.593998	0.654675
ANKRD31	10.2042	0.398324	0.703398	0.566285	0.5712	0.633271
ANKRD33	5.49952	4.61572	1.44766	3.1884	0.00143061	0.00268027
ANKRD33B	105.672	1.20561	0.272854	4.41854	9.93716e-06	2.3823e-05
ANKRD34A	100.151	-1.85906	0.235114	-7.90707	2.63515e-15	1.28002e-14
ANKRD34B	9.59626	-0.621272	0.674259	-0.921414	0.356834	0.424844
ANKRD34C	1.02275	-0.563795	2.16865	-0.259975	0.794883	0.832732
ANKRD35	12.5985	0.412794	0.59014	0.699484	0.484249	0.551027
ANKRD36	590.238	-1.1897	0.204005	-5.83172	5.48604e-09	1.74655e-08
ANKRD36.1	590.238	-1.1897	0.204005	-5.83172	5.48604e-09	1.74655e-08
ANKRD36B	143.728	-0.752369	0.225756	-3.33266	0.000860212	0.0016577
ANKRD36B.1	143.728	-0.752369	0.225756	-3.33266	0.000860212	0.0016577
ANKRD36C	422.914	-1.34833	0.243826	-5.52988	3.20458e-08	9.57384e-08
ANKRD37	15.7571	1.26686	0.551214	2.29832	0.0215437	0.0337943
ANKRD39	129.019	-0.0565649	0.19418	-0.291302	0.770821	0.812015
ANKRD40	1120.62	0.640321	0.100269	6.38601	1.70265e-10	6.07868e-10
ANKRD42	273.046	-0.411333	0.175263	-2.34695	0.018928	0.0300104
ANKRD44	537.808	-1.27809	0.135905	-9.40433	5.23604e-21	3.37148e-20
ANKRD45	213.719	-3.38409	0.248768	-13.6034	3.8231e-42	5.45633e-41
ANKRD46	1452.63	-1.19349	0.0897767	-13.294	2.50875e-40	3.3694e-39
ANKRD49	320.084	-0.192881	0.150203	-1.28414	0.199094	0.255589
ANKRD50	1755.61	-0.475055	0.121187	-3.92	8.85482e-05	0.00019279
ANKRD52	1979.21	-0.242147	0.134051	-1.80638	0.0708591	0.100635
ANKRD53	28.9887	-0.56204	0.402052	-1.39793	0.162135	0.212849
ANKRD54	534.354	-0.556612	0.12336	-4.51208	6.41952e-06	1.56569e-05
ANKRD55	21.621	-4.45337	0.688379	-6.46936	9.84189e-11	3.56746e-10
ANKRD6	746.171	-0.691443	0.110826	-6.23899	4.40417e-10	1.52661e-09
ANKRD60	0
ANKRD61	21.7436	0.99496	0.51426	1.93474	0.053022	0.0773476
ANKRD62	0
ANKRD63	11.0705	1.39978	0.732486	1.91099	0.0560053	0.0812255
ANKRD65	43.4641	1.18164	0.340804	3.46721	0.000525881	0.0010425
ANKRD66	0.58159	2.37593	3.17627	0.748023	0.454446	0.521134
ANKRD7	0.534978	2.26898	2.82039	0.804494	0.421112	0.489267
ANKRD9	292.535	1.89239	0.193777	9.76584	1.57801e-22	1.08477e-21
ANKS1A	2219.36	0.0213206	0.126707	0.168266	0.866374	0.891998
ANKS1B	677.971	-3.07274	0.128324	-23.9451	1.03823e-126	7.7854e-125
ANKS3	409.514	-0.209203	0.128944	-1.62244	0.10471	0.143863
ANKS4B	30.6543	8.10298	1.23479	6.56221	5.30156e-11	1.95197e-10
ANKS4B.1	30.6543	8.10298	1.23479	6.56221	5.30156e-11	1.95197e-10
ANKS6	850.242	1.09176	0.139275	7.83887	4.54619e-15	2.17427e-14
ANKUB1	1.22526	-4.01583	2.1775	-1.84424	0.0651481	0.0933347
ANKZF1	983.419	-0.191354	0.0947945	-2.01862	0.0435267	0.0646009
ANLN	1214.02	0.639858	0.100694	6.35449	2.09117e-10	7.41573e-10
ANO1	154.18	4.84062	0.708937	6.82799	8.6114e-12	3.35671e-11
ANO10	519.822	0.80074	0.121094	6.61253	3.77815e-11	1.40981e-10
ANO2	35.833	0.261999	0.414723	0.631746	0.527553	0.592103
ANO3	8.21691	5.20808	1.3449	3.87246	0.000107744	0.000232252
ANO4	88.1188	-1.90744	0.276352	-6.90223	5.1194e-12	2.0267e-11
ANO4.1	88.1188	-1.90744	0.276352	-6.90223	5.1194e-12	2.0267e-11
ANO5	328.419	0.285034	0.165785	1.7193	0.0855597	0.119737
ANO6	1556.52	1.72195	0.1302	13.2254	6.25797e-40	8.27515e-39
ANO7	24.0967	2.05706	0.544032	3.78113	0.000156115	0.000330658
ANO8	1333.81	-1.65325	0.141373	-11.6943	1.36333e-31	1.34149e-30
ANO9	69.1863	8.31132	1.21377	6.84751	7.5145e-12	2.9355e-11
ANP32A	7601.61	0.0380614	0.102894	0.369909	0.71145	0.759384
ANP32B	4482.88	0.729707	0.102571	7.11415	1.12603e-12	4.66189e-12
ANP32D	0.433927	1.95283	3.54794	0.550412	0.582037
ANP32E	3606.11	-0.240775	0.0998433	-2.41153	0.0158858	0.0255379
ANPEP	346.614	7.41617	0.483194	15.3482	3.63909e-53	6.98217e-52
ANTXR1	2546.34	0.189284	0.132538	1.42815	0.153248	0.202333
ANTXR2	572.067	1.71272	0.126657	13.5225	1.15222e-41	1.62257e-40
ANTXRL	0.244183	1.15671	4.0516	0.285495	0.775265
ANXA1	320.389	2.85482	0.180335	15.8306	1.91249e-56	3.95167e-55
ANXA10	0.155917	0.403169	4.08047	0.0988045	0.921294
ANXA11	657.493	1.99784	0.123317	16.2009	4.97316e-59	1.1036e-57
ANXA13	2.34697	4.39602	1.7433	2.52167	0.0116798	0.0191982
ANXA2	3478.79	5.6094	0.16569	33.8549	3.07464e-251	1.31748e-248
ANXA2R	14.2021	2.28213	0.668498	3.41382	0.000640587	0.00125804
ANXA3	177.949	5.58629	0.382775	14.5942	3.05828e-48	5.17293e-47
ANXA4	298.219	3.20437	0.251361	12.7481	3.19629e-37	3.86065e-36
ANXA5	2392.04	1.10078	0.107636	10.2269	1.50239e-24	1.12802e-23
ANXA6	4001.58	2.12624	0.0931128	22.8351	2.05305e-115	1.29192e-113
ANXA7	805.252	0.718089	0.112058	6.40817	1.47272e-10	5.27664e-10
ANXA8	75.9953	8.45114	1.20313	7.02429	2.15153e-12	8.73078e-12
ANXA8L1	90.557	9.66896	1.19754	8.07403	6.80139e-16	3.42295e-15
ANXA9	176.612	-0.698703	0.173169	-4.03479	5.46501e-05	0.000121906
AOAH	24.4429	-1.58174	0.467215	-3.38548	0.000710549	0.00138666
AOC1	23.8017	6.76374	1.25609	5.38477	7.25382e-08	2.10458e-07
AOC2	81.9031	-0.266646	0.269238	-0.990371	0.321993	0.388424
AOC3	59.5718	1.54982	0.304681	5.0867	3.64353e-07	9.97151e-07
AOX1	34.3756	2.40913	0.417267	5.7736	7.75967e-09	2.43336e-08
AP1AR	784.653	-0.556821	0.117778	-4.72769	2.27085e-06	5.7781e-06
AP1B1	2366.59	-0.357073	0.133418	-2.67635	0.00744279	0.0126164
AP1G1	3165.94	-0.576718	0.08681	-6.64346	3.06404e-11	1.14954e-10
AP1G2	704.954	0.441564	0.141105	3.12932	0.00175212	0.00324747
AP1M1	2085.04	-0.302208	0.115716	-2.61164	0.00901092	0.0150996
AP1M2	146.347	4.58791	0.36211	12.6699	8.67762e-37	1.0288e-35
AP1S1	1356.53	-0.249127	0.11576	-2.1521	0.0313892	0.0477968
AP1S2	1370.54	0.2568	0.110187	2.33058	0.0197756	0.0312524
AP1S3	71.9678	-0.117972	0.26547	-0.44439	0.656761	0.710405
AP2A1	2657.86	-0.0990396	0.111653	-0.887027	0.375064	0.443818
AP2A2	2775.58	-0.519715	0.0894087	-5.8128	6.1438e-09	1.94802e-08
AP2A2.1	2775.58	-0.519715	0.0894087	-5.8128	6.1438e-09	1.94802e-08
AP2A2.2	2775.58	-0.519715	0.0894087	-5.8128	6.1438e-09	1.94802e-08
AP2B1	11654	-0.931608	0.0794395	-11.7273	9.23936e-32	9.14636e-31
AP2M1	6599.21	-0.496731	0.0972896	-5.10569	3.29587e-07	9.03929e-07
AP2S1	1235.82	0.296011	0.134553	2.19995	0.0278102	0.0427669
AP3B1	1121.53	1.53007	0.0961451	15.9141	5.05621e-57	1.05687e-55
AP3B2	1066.75	-2.79471	0.414076	-6.74925	1.48608e-11	5.705e-11
AP3D1	4355.13	-0.117537	0.121269	-0.969228	0.332431	0.399171
AP3M1	2524.36	-0.272726	0.0887851	-3.07175	0.00212806	0.00390126
AP3M2	1027.24	-0.789869	0.102513	-7.70505	1.30788e-14	6.08688e-14
AP3S1	1181.82	0.16441	0.12878	1.27668	0.201716	0.258476
AP3S2	18.7451	-0.184934	0.51971	-0.355841	0.72196	0.76896
AP4B1	462.597	-1.09814	0.12302	-8.92657	4.39426e-19	2.5819e-18
AP4E1	386.934	-0.00194766	0.150475	-0.0129434	0.989673	0.991822
AP4M1	380.446	-0.305577	0.138334	-2.20898	0.0271762	0.0418706
AP4S1	351.306	-0.997226	0.138485	-7.20096	5.97909e-13	2.52122e-12
AP5B1	487.314	-0.474942	0.147954	-3.21007	0.00132703	0.00249582
AP5M1	928.232	-0.291767	0.110274	-2.64583	0.00814909	0.0137398
AP5S1	119.445	-0.236545	0.207974	-1.13737	0.255382	0.318057
AP5Z1	519.839	0.280223	0.128599	2.17905	0.0293282	0.0449131
APAF1	1169.21	-0.128446	0.145123	-0.885083	0.376112	0.444853
APBA1	1045.22	-2.85302	0.190959	-14.9405	1.79633e-50	3.24584e-49
APBA1.1	1045.22	-2.85302	0.190959	-14.9405	1.79633e-50	3.24584e-49
APBA2	3552.62	-0.985247	0.14124	-6.97567	3.04412e-12	1.22261e-11
APBA2.1	3552.62	-0.985247	0.14124	-6.97567	3.04412e-12	1.22261e-11
APBA3	250.551	0.786569	0.166747	4.71714	2.39184e-06	6.07735e-06
APBB1	3164.86	-1.08454	0.116102	-9.34128	9.51807e-21	6.06146e-20
APBB1IP	14.6492	4.09935	0.88521	4.63093	3.64022e-06	9.09272e-06
APBB2	2116.14	-1.12277	0.0895081	-12.5437	4.30154e-36	4.98486e-35
APBB3	751.608	-0.408514	0.114512	-3.56742	0.000360509	0.000730721
APC	4523.24	-1.8363	0.118647	-15.4771	4.95575e-54	9.73676e-53
APC2	5530.24	-2.85329	0.514016	-5.55099	2.84063e-08	8.53613e-08
APCDD1	1061.71	3.37906	0.182618	18.5034	1.93696e-76	6.58969e-75
APCDD1L	7.19231	6.01114	1.38789	4.33114	1.48339e-05	3.50672e-05
APCS	0
APEH	1931.99	0.903297	0.107764	8.38218	5.19566e-17	2.77056e-16
APELA	76.5468	9.4283	1.21234	7.77693	7.43058e-15	3.51085e-14
APEX1	5248.34	0.344478	0.110098	3.12882	0.00175508	0.00325195
APEX1.1	5248.34	0.344478	0.110098	3.12882	0.00175508	0.00325195
APEX2	318.229	1.12115	0.147867	7.58216	3.39859e-14	1.54261e-13
APH1A	2514.63	0.747578	0.101851	7.33988	2.13782e-13	9.25307e-13
APH1B	578.766	-0.497152	0.114688	-4.3348	1.45892e-05	3.45067e-05
API5	3436.2	0.264741	0.0858434	3.084	0.00204239	0.00375362
APIP	395.863	0.43688	0.151544	2.88286	0.00394089	0.00695949
APLF	71.4141	1.11882	0.274129	4.08137	4.47702e-05	0.000100704
APLN	65.3499	-1.92734	0.323119	-5.9648	2.44933e-09	8.03217e-09
APLNR	227.213	8.57046	1.2204	7.02268	2.17656e-12	8.82641e-12
APLP1	5714.97	-1.61101	0.174387	-9.23812	2.50871e-20	1.5666e-19
APLP2	10905.7	0.907732	0.078865	11.5099	1.17548e-30	1.12348e-29
APMAP	1977.69	0.368344	0.0957437	3.84718	0.000119484	0.000256666
APOA1	10000.1	12.598	0.529129	23.809	2.69607e-125	1.96442e-123
APOA2	7099.23	15.961	1.18406	13.4799	2.05296e-41	2.85526e-40
APOA4	3222.73	14.8216	1.25271	11.8316	2.67914e-32	2.7241e-31
APOA5	7.48598	6.07564	1.37859	4.40715	1.04742e-05	2.50403e-05
APOB	13793.2	13.7411	0.667667	20.5807	4.08373e-94	1.88448e-92
APOB.1	13793.2	13.7411	0.667667	20.5807	4.08373e-94	1.88448e-92
APOBEC1	0
APOBEC2	18.1587	-0.243695	0.557904	-0.436805	0.662253	0.715228
APOBEC3A	0.724722	2.69035	2.58589	1.0404	0.298155	0.363814
APOBEC3A.1	0.724722	2.69035	2.58589	1.0404	0.298155	0.363814
APOBEC3B	21.9295	5.73317	1.12904	5.0779	3.81637e-07	1.04303e-06
APOBEC3C	133.491	3.27123	0.268418	12.187	3.64426e-34	3.93672e-33
APOBEC3D	21.7234	3.1371	0.590949	5.30857	1.10489e-07	3.1558e-07
APOBEC3F	85.1973	3.60762	0.382176	9.43968	3.73936e-21	2.42251e-20
APOBEC3G	31.5575	8.14631	1.23358	6.60377	4.00833e-11	1.49138e-10
APOBEC3H	6.78678	3.97795	1.27953	3.10891	0.00187777	0.00346856
APOBEC4	0.624962	-3.04309	3.69489	-0.823594	0.41017	0.478656
APOBR	11.5613	3.09746	0.832771	3.71946	0.000199652	0.000418098
APOC1	410.319	7.39815	0.443896	16.6664	2.29927e-62	5.5395e-61
APOC2	0
APOC3	4214.7	15.2088	1.18204	12.8666	6.93923e-38	8.61278e-37
APOC4	0
APOC4-APOC2	0.208321	-1.52038	4.08047	-0.3726	0.709446
APOD	16.2585	1.79236	0.949024	1.88863	0.0589408	0.0852425
APOE	6948.55	7.61433	0.179474	42.4259	0	0
APOF	2.57963	3.45865	1.68306	2.05497	0.0398814	0.0597176
APOH	48.3419	8.76243	1.21412	7.2171	5.3107e-13	2.24569e-12
APOL1	1.93396	2.99069	1.82188	1.64154	0.100685	0.138896
APOL2	307.614	0.286669	0.147152	1.94811	0.0514017	0.0752952
APOL3	0.926825	3.06414	2.33259	1.31362	0.188973	0.24397
APOL4	25.0483	-1.16786	0.465689	-2.50782	0.0121478	0.0199112
APOL5	0.406573	-2.4263	4.0369	-0.60103	0.54782
APOL5.1	0.406573	-2.4263	4.0369	-0.60103	0.54782
APOL6	25.4605	5.36155	0.917427	5.84411	5.09281e-09	1.62366e-08
APOLD1	195.296	-1.30818	0.177666	-7.36311	1.79679e-13	7.80705e-13
APOM	384.966	3.92594	0.220549	17.8008	6.96647e-71	2.09308e-69
APOM.1	384.966	3.92594	0.220549	17.8008	6.96647e-71	2.09308e-69
APOM.2	384.966	3.92594	0.220549	17.8008	6.96647e-71	2.09308e-69
APOM.3	384.966	3.92594	0.220549	17.8008	6.96647e-71	2.09308e-69
APOM.4	384.966	3.92594	0.220549	17.8008	6.96647e-71	2.09308e-69
APOM.5	384.966	3.92594	0.220549	17.8008	6.96647e-71	2.09308e-69
APOM.6	384.966	3.92594	0.220549	17.8008	6.96647e-71	2.09308e-69
APOO	395.008	-0.291013	0.156912	-1.85463	0.063649	0.0914053
APOOL	615.5	-0.0230548	0.110639	-0.208378	0.834933	0.866469
APP	17724.1	-0.123676	0.0763749	-1.61933	0.105376	0.144668
APPBP2	2076.5	-0.499169	0.0945867	-5.27737	1.31053e-07	3.71721e-07
APPL1	1086.83	-0.376824	0.110916	-3.39737	0.000680359	0.00133207
APPL2	1683.71	-0.549852	0.122381	-4.49296	7.02394e-06	1.70594e-05
APRT	578.616	1.73811	0.147889	11.7528	6.83369e-32	6.79856e-31
APTX	605.856	0.489076	0.132744	3.68437	0.000229268	0.000475471
AQP1	2428.95	7.48357	0.222775	33.5925	2.1607e-247	8.64135e-245
AQP10	5.02731	2.84385	1.24813	2.27848	0.0226977	0.0354716
AQP11	84.9243	-0.90254	0.236357	-3.81854	0.000134244	0.000286765
AQP12A	0.122092	0.403169	4.08047	0.0988045	0.921294
AQP12B	1.53525	2.62093	1.87319	1.39918	0.161759	0.212386
AQP2	0.684583	-0.554693	2.7413	-0.202347	0.839646	0.870205
AQP3	177.885	3.63264	0.26719	13.5957	4.24649e-42	6.0462e-41
AQP4	33.1084	-0.55216	0.433815	-1.2728	0.203088	0.259974
AQP5	8.70031	1.55442	0.795809	1.95326	0.0507887	0.0744518
AQP6	6.87035	0.67255	0.895765	0.750811	0.452766	0.519604
AQP7	9.49144	6.41511	1.33178	4.81695	1.45766e-06	3.78988e-06
AQP8	1.99176	-2.03138	1.53192	-1.32604	0.184828	0.239202
AQP9	0.433927	1.95283	3.54794	0.550412	0.582037
AQR	1396.59	0.34942	0.0990679	3.52708	0.000420173	0.000844994
AR	214.997	0.121032	0.175027	0.691507	0.489247	0.556076
ARAF	715.302	0.943385	0.113124	8.33939	7.46742e-17	3.95501e-16
ARAP1	1107.04	2.19854	0.140799	15.6147	5.78468e-55	1.15674e-53
ARAP2	150.488	-2.77799	0.20978	-13.2424	4.99359e-40	6.61292e-39
ARAP3	351.056	0.448509	0.147622	3.03823	0.00237969	0.00433606
ARC	126.639	-1.57898	0.230021	-6.86449	6.6731e-12	2.61476e-11
ARCN1	4019.6	0.635932	0.0849165	7.48891	6.94496e-14	3.09991e-13
AREG	25.4975	7.8361	1.28727	6.0874	1.14759e-09	3.87418e-09
AREL1	2060.95	-0.842312	0.103735	-8.11985	4.66751e-16	2.36957e-15
ARF1	6700.1	0.253143	0.0902143	2.80602	0.00501581	0.00870068
ARF3	4129.42	-0.174327	0.0967424	-1.80197	0.07155	0.101553
ARF4	3581.87	0.210346	0.123826	1.69872	0.0893715	0.124722
ARF5	2318.86	-0.0164293	0.102629	-0.160084	0.872815	0.897398
ARF6	1690.17	0.0489257	0.10102	0.484316	0.628162	0.684643
ARFGAP1	1778.7	0.814713	0.105362	7.73252	1.05436e-14	4.92867e-14
ARFGAP2	1781.7	-0.0711795	0.093677	-0.75984	0.44735	0.5148
ARFGAP3	1279.83	-0.374852	0.108012	-3.47046	0.000519562	0.00103154
ARFGEF1	1941.79	-0.332426	0.102345	-3.24809	0.00116181	0.00220607
ARFGEF2	1134.76	0.533392	0.14012	3.80669	0.000140838	0.000299996
ARFIP1	615.699	0.172215	0.136732	1.2595	0.207848	0.265481
ARFIP2	913.138	-0.0949551	0.106184	-0.89425	0.371188	0.439636
ARFRP1	468.051	0.052682	0.143474	0.367189	0.713478	0.761187
ARG1	36.4477	3.36704	0.501419	6.71503	1.88028e-11	7.1709e-11
ARG2	848.577	-0.675852	0.140684	-4.80404	1.55493e-06	4.03172e-06
ARGFX	18.2069	7.35887	1.32562	5.55126	2.83625e-08	8.52437e-08
ARGLU1	8786.07	-0.335124	0.0850642	-3.93967	8.15948e-05	0.000178428
ARHGAP1	1192.5	0.0323806	0.0926879	0.34935	0.726826	0.773273
ARHGAP10	232.217	5.03633	0.314856	15.9957	1.37005e-57	2.90764e-56
ARHGAP11A	1443.33	-0.310301	0.0990765	-3.13193	0.00173659	0.00322167
ARHGAP11A.1	1443.33	-0.310301	0.0990765	-3.13193	0.00173659	0.00322167
ARHGAP11B	52.2126	-0.603643	0.335446	-1.79952	0.0719363	0.102012
ARHGAP11B.1	52.2126	-0.603643	0.335446	-1.79952	0.0719363	0.102012
ARHGAP11B.2	52.2126	-0.603643	0.335446	-1.79952	0.0719363	0.102012
ARHGAP12	1247.92	-0.54077	0.0927354	-5.83133	5.49883e-09	1.75031e-08
ARHGAP15	13.185	2.16793	0.682324	3.17727	0.00148669	0.00277783
ARHGAP17	1044.77	0.508239	0.103556	4.90787	9.20691e-07	2.43278e-06
ARHGAP17.1	1044.77	0.508239	0.103556	4.90787	9.20691e-07	2.43278e-06
ARHGAP18	135.08	1.73643	0.229139	7.57807	3.50721e-14	1.58909e-13
ARHGAP19	660.903	0.463384	0.115544	4.01047	6.05985e-05	0.000134508
ARHGAP19-SLIT1	0.46529	0.267269	3.06337	0.0872465	0.930476	0.945021
ARHGAP20	132.021	-0.882469	0.247691	-3.56278	0.000366951	0.000743612
ARHGAP21	6961.52	-2.09031	0.0866426	-24.1257	1.34451e-128	1.05205e-126
ARHGAP22	77.1512	3.31799	0.374874	8.85093	8.67902e-19	5.01916e-18
ARHGAP23	1469.1	-0.582897	0.140253	-4.15605	3.23804e-05	7.40376e-05
ARHGAP23.1	1469.1	-0.582897	0.140253	-4.15605	3.23804e-05	7.40376e-05
ARHGAP24	155.477	1.36345	0.192386	7.08704	1.37006e-12	5.64105e-12
ARHGAP25	16.3877	1.16362	0.544332	2.1377	0.032541	0.0494586
ARHGAP26	280.462	0.715211	0.173262	4.12792	3.66052e-05	8.31719e-05
ARHGAP27	130.207	0.841444	0.215773	3.89968	9.63216e-05	0.00020883
ARHGAP27.1	130.207	0.841444	0.215773	3.89968	9.63216e-05	0.00020883
ARHGAP27.2	130.207	0.841444	0.215773	3.89968	9.63216e-05	0.00020883
ARHGAP28	1412.09	2.94684	0.179341	16.4315	1.13793e-60	2.62891e-59
ARHGAP29	642.135	5.52255	0.258839	21.3358	5.27783e-101	2.67564e-99
ARHGAP30	28.0885	0.789673	0.532161	1.4839	0.137836	0.184053
ARHGAP31	238.92	1.26382	0.260358	4.85415	1.20907e-06	3.1655e-06
ARHGAP32	2176.91	-0.932071	0.132583	-7.03009	2.06403e-12	8.38898e-12
ARHGAP33	2771.24	-2.07456	0.114233	-18.1609	1.05356e-73	3.41639e-72
ARHGAP35	5493.68	-0.996192	0.131772	-7.55996	4.03203e-14	1.82277e-13
ARHGAP36	15.7247	-2.88385	0.614546	-4.69266	2.69677e-06	6.82134e-06
ARHGAP39	669.04	-0.327785	0.151942	-2.1573	0.0309822	0.047213
ARHGAP4	130.483	0.91218	0.206092	4.42607	9.59643e-06	2.30368e-05
ARHGAP40	7.701	-0.943766	0.767781	-1.22921	0.218992	0.278255
ARHGAP42	450.99	2.82025	0.223893	12.5965	2.20854e-36	2.57263e-35
ARHGAP44	338.39	-0.090116	0.143598	-0.627556	0.530295	0.594884
ARHGAP5	3521.97	-0.233375	0.139209	-1.67643	0.0936542	0.130033
ARHGAP6	215.917	3.77281	0.249511	15.1208	1.18099e-51	2.19342e-50
ARHGAP8	0.122092	0.403169	4.08047	0.0988045	0.921294
ARHGAP9	14.1381	2.13368	0.656884	3.24819	0.00116141	0.00220554
ARHGDIA	3498.3	0.287842	0.0934719	3.07945	0.0020738	0.00380723
ARHGDIB	55.6248	4.22252	0.468073	9.02105	1.8629e-19	1.1157e-18
ARHGDIG	198.871	-2.3959	0.29407	-8.14738	3.71901e-16	1.90091e-15
ARHGEF1	821.224	0.645473	0.111451	5.79156	6.97359e-09	2.1995e-08
ARHGEF10	978.351	1.22583	0.128305	9.554	1.24782e-21	8.25926e-21
ARHGEF10.1	978.351	1.22583	0.128305	9.554	1.24782e-21	8.25926e-21
ARHGEF10L	1231.29	-0.505446	0.153735	-3.28778	0.00100982	0.00193199
ARHGEF11	2062.19	-0.65913	0.12024	-5.48178	4.21069e-08	1.24188e-07
ARHGEF12	4117.56	-0.865287	0.11744	-7.36792	1.73315e-13	7.53601e-13
ARHGEF15	13.4747	2.06002	0.743623	2.77025	0.00560129	0.00965671
ARHGEF16	126.192	3.05694	0.287834	10.6205	2.3929e-26	1.95661e-25
ARHGEF17	1942.76	1.66674	0.14364	11.6036	3.95284e-31	3.84952e-30
ARHGEF18	1366.69	0.0833932	0.117775	0.708075	0.478899	0.545559
ARHGEF19	184.876	2.28543	0.228185	10.0157	1.30025e-23	9.37902e-23
ARHGEF19.1	184.876	2.28543	0.228185	10.0157	1.30025e-23	9.37902e-23
ARHGEF2	2717.54	-0.814606	0.0944119	-8.62821	6.23179e-18	3.44876e-17
ARHGEF25	996.563	0.0996671	0.0991088	1.00563	0.314592	0.380773
ARHGEF26	461.339	0.393125	0.155431	2.52926	0.0114302	0.0188206
ARHGEF26.1	461.339	0.393125	0.155431	2.52926	0.0114302	0.0188206
ARHGEF28	50.945	-0.578825	0.403914	-1.43304	0.151847	0.200616
ARHGEF3	554.562	1.64253	0.162119	10.1316	4.00048e-24	2.95189e-23
ARHGEF33	30.0116	-1.6518	0.439529	-3.7581	0.000171207	0.000361178
ARHGEF35	9.72492	6.44345	1.36143	4.73284	2.21405e-06	5.63948e-06
ARHGEF35.1	9.72492	6.44345	1.36143	4.73284	2.21405e-06	5.63948e-06
ARHGEF37	56.8968	-0.994058	0.297533	-3.341	0.000834783	0.0016118
ARHGEF38	18.1887	3.16022	0.671273	4.7078	2.50403e-06	6.34898e-06
ARHGEF39	214.559	0.520995	0.159882	3.25862	0.00111957	0.00213035
ARHGEF4	698.531	-1.02673	0.114629	-8.95695	3.33779e-19	1.97405e-18
ARHGEF40	2200.14	0.594407	0.120468	4.93414	8.05054e-07	2.14169e-06
ARHGEF5	49.8732	6.34687	0.881699	7.19845	6.08999e-13	2.56438e-12
ARHGEF5.1	49.8732	6.34687	0.881699	7.19845	6.08999e-13	2.56438e-12
ARHGEF6	465.753	-2.35289	0.137643	-17.0941	1.64117e-65	4.2806e-64
ARHGEF7	4402.46	-1.17137	0.0869728	-13.4682	2.40698e-41	3.34505e-40
ARHGEF9	2937.3	-1.42273	0.105029	-13.546	8.36176e-42	1.18587e-40
ARID1A	7645.75	-0.596648	0.130625	-4.56765	4.93226e-06	1.21564e-05
ARID1B	3206.71	0.0320665	0.129412	0.247786	0.8043	0.840006
ARID2	1982.51	-0.0287262	0.124959	-0.229884	0.818182	0.852279
ARID3A	755.213	3.37328	0.200978	16.7843	3.17979e-63	7.89333e-62
ARID3B	1083.5	1.94563	0.13631	14.2736	3.1986e-46	5.15355e-45
ARID3C	15.9381	-0.64642	0.584572	-1.1058	0.268813	0.332754
ARID4A	1243.22	-1.30382	0.100377	-12.9893	1.40796e-38	1.78068e-37
ARID4B	1764.24	-0.610886	0.121934	-5.00997	5.44379e-07	1.4673e-06
ARID5A	116.961	1.36108	0.246764	5.51573	3.47342e-08	1.03341e-07
ARID5B	817.864	-0.0991952	0.162568	-0.610176	0.541745	0.606632
ARIH1	2807.97	-0.303664	0.0954652	-3.18088	0.00146827	0.00274569
ARIH2	2049.94	-0.472881	0.088178	-5.3628	8.19413e-08	2.36557e-07
ARL1	1406.14	0.94487	0.119406	7.91311	2.51043e-15	1.22241e-14
ARL10	477.168	-1.08561	0.209906	-5.17189	2.31742e-07	6.4362e-07
ARL11	2.12713	4.26095	1.80548	2.36002	0.0182742	0.0290428
ARL13A	12.691	-0.616539	0.572678	-1.07659	0.281664	0.346938
ARL13B	398.217	-0.474784	0.123742	-3.83688	0.000124608	0.000267003
ARL14	1.34014	3.57874	2.45026	1.46056	0.144137	0.191541
ARL14EP	615.835	-0.168093	0.111835	-1.50304	0.132829	0.177985
ARL14EPL	0
ARL15	457.284	-0.720161	0.137692	-5.23022	1.6931e-07	4.76178e-07
ARL16	476.533	-0.148023	0.129098	-1.14659	0.25155	0.313992
ARL17A	81.5201	-0.0846874	0.249816	-0.338999	0.73461	0.779895
ARL17B	54.8108	-0.364406	0.303146	-1.20208	0.229332	0.289371
ARL17B.1	54.8108	-0.364406	0.303146	-1.20208	0.229332	0.289371
ARL17B.2	54.8108	-0.364406	0.303146	-1.20208	0.229332	0.289371
ARL2	455.921	0.734376	0.162708	4.51345	6.37808e-06	1.556e-05
ARL2-SNX15	0.193721	-1.52038	4.08047	-0.3726	0.709446
ARL2BP	1663.1	-0.380591	0.115037	-3.30843	0.000938217	0.00180127
ARL3	2102.57	-1.26199	0.110839	-11.3858	4.92424e-30	4.6109e-29
ARL4A	337.708	1.49187	0.253629	5.8821	4.05093e-09	1.30285e-08
ARL4C	1700.71	-0.362365	0.0876128	-4.13598	3.53438e-05	8.04455e-05
ARL4D	698.583	-1.60208	0.13903	-11.5233	1.00675e-30	9.64772e-30
ARL5A	954.218	0.576151	0.126051	4.57077	4.85929e-06	1.1983e-05
ARL5B	2447.44	0.441473	0.135863	3.24939	0.00115654	0.00219699
ARL5C	2.63182	-2.38079	1.64595	-1.44646	0.148049	0.19616
ARL6	267.426	-0.859768	0.178243	-4.82358	1.41006e-06	3.66982e-06
ARL6IP1	6767.77	-0.458588	0.0986928	-4.64662	3.37411e-06	8.46325e-06
ARL6IP4	1769.88	1.08144	0.103543	10.4444	1.55433e-25	1.22744e-24
ARL6IP5	2241.1	-0.0225647	0.0963063	-0.234301	0.814751	0.849344
ARL6IP6	828.892	0.0737242	0.131221	0.561833	0.574229	0.635964
ARL8A	1678.07	-1.31165	0.130554	-10.0468	9.48928e-24	6.90014e-23
ARL8B	1447.6	-0.218569	0.0925589	-2.3614	0.018206	0.0289485
ARL9	28.0745	-1.16982	0.405373	-2.88578	0.0039045	0.00689997
ARMC1	1282.22	-0.438334	0.107569	-4.07491	4.60326e-05	0.000103401
ARMC10	466.795	0.404271	0.136919	2.95263	0.00315078	0.00564956
ARMC10.1	466.795	0.404271	0.136919	2.95263	0.00315078	0.00564956
ARMC12	57.1059	-0.689301	0.298445	-2.30964	0.0209081	0.0328689
ARMC2	144.975	-1.17153	0.189116	-6.19479	5.83628e-10	2.00718e-09
ARMC3	19.7589	2.26022	0.570104	3.96457	7.35279e-05	0.00016181
ARMC5	465.145	-0.335647	0.143467	-2.33955	0.0193071	0.0305736
ARMC6	691.995	0.16105	0.129836	1.24041	0.214823	0.273536
ARMC7	275.764	0.408422	0.149671	2.7288	0.00635646	0.0108867
ARMC8	1285.01	-0.642408	0.094704	-6.78333	1.17437e-11	4.54422e-11
ARMC9	488.315	0.776293	0.126875	6.11855	9.44288e-10	3.20769e-09
ARMCX1	1159.92	-0.441187	0.117761	-3.74646	0.000179349	0.000377117
ARMCX2	1711.42	0.983061	0.0945905	10.3928	2.67371e-25	2.07767e-24
ARMCX3	2451.15	-0.0727408	0.0825732	-0.880926	0.378358	0.446981
ARMCX4	1041.28	-0.670885	0.13829	-4.85129	1.22661e-06	3.2091e-06
ARMCX5	318.288	-0.253503	0.151897	-1.66891	0.0951351	0.131926
ARMCX5-GPRASP2	62.5449	-0.948193	0.280942	-3.37505	0.000738021	0.001437
ARMCX6	450.814	0.253798	0.129823	1.95495	0.0505887	0.0742069
ARMS2	0.193721	-1.52038	4.08047	-0.3726	0.709446
ARNT	1440.51	0.481413	0.102365	4.70291	2.56485e-06	6.49861e-06
ARNT2	3714.85	-1.95984	0.127371	-15.3869	2.00294e-53	3.86356e-52
ARPC1A	2371.53	0.192593	0.106244	1.81274	0.0698726	0.0994069
ARPC1B	527.934	3.47451	0.232859	14.9211	2.40343e-50	4.32114e-49
ARPC2	4072.48	0.0652841	0.108338	0.602595	0.546778	0.611188
ARPC3	2488.71	0.0706744	0.108247	0.6529	0.513821	0.579146
ARPC4	1236.91	-0.119949	0.104959	-1.14281	0.253117	0.315686
ARPC4-TTLL3	0
ARPC5	2148.58	-0.126128	0.11942	-1.05618	0.290887	0.356565
ARPC5L	632.674	-0.0215761	0.122889	-0.175574	0.860628	0.887385
ARPP19	4917.62	-0.116008	0.086899	-1.33497	0.181886	0.236006
ARPP21	384.742	-5.86409	0.255102	-22.9872	6.25406e-117	4.03421e-115
ARR3	10.2841	-0.796421	0.674895	-1.18007	0.237974	0.298704
ARRB1	1913.41	0.294152	0.123642	2.37906	0.0173568	0.0276949
ARRB2	1227.87	-0.761965	0.112613	-6.76622	1.32194e-11	5.0966e-11
ARRDC1	514.141	-0.580715	0.130596	-4.44664	8.72219e-06	2.09998e-05
ARRDC2	49.4629	2.69106	0.421859	6.37904	1.78203e-10	6.34949e-10
ARRDC3	4036.8	-0.131539	0.0944028	-1.39338	0.163504	0.214568
ARRDC4	2098.4	-0.783437	0.0888784	-8.81471	1.19994e-18	6.89507e-18
ARRDC5	0
ARSA	629.634	0.347455	0.130518	2.66212	0.00776504	0.0131354
ARSB	711.866	-0.425136	0.133523	-3.18398	0.00145266	0.00271848
ARSD	400.272	-0.188059	0.131202	-1.43336	0.151756	0.20051
ARSF	4.15346	4.19824	1.5079	2.78417	0.00536654	0.00927404
ARSG	100.593	1.43943	0.240879	5.97574	2.29047e-09	7.5318e-09
ARSH	0
ARSI	223.69	7.30086	0.569384	12.8224	1.22863e-37	1.51139e-36
ARSJ	32.996	4.98326	0.764609	6.51739	7.15402e-11	2.61742e-10
ARSK	253.222	0.522937	0.155096	3.37169	0.000747076	0.00145274
ART1	6.3136	-0.0711658	0.857463	-0.0829958	0.933855	0.947685
ART3	6.81935	2.51781	1.0517	2.39405	0.0166636	0.026655
ART4	1.62225	3.86766	1.96821	1.96506	0.0494072	0.0726574
ART5	90.1518	4.13475	0.395469	10.4553	1.38545e-25	1.09552e-24
ARTN	20.6274	-0.704107	0.488033	-1.44275	0.149092	0.19728
ARV1	334.211	-0.130577	0.149673	-0.872419	0.38298	0.451789
ARVCF	1375.37	-0.544738	0.15797	-3.44836	0.000563999	0.00111407
ARX	2095.87	-8.86464	0.270874	-32.726	6.66271e-235	2.22053e-232
AS3MT	5.61753	1.85762	0.992934	1.87084	0.0613674	0.0884506
ASAH1	1573.12	-0.327898	0.0884965	-3.70521	0.000211219	0.000440476
ASAH2	10.3148	1.41454	0.694297	2.03738	0.0416122	0.0620408
ASAH2B	141.224	0.0267419	0.204401	0.13083	0.895909	0.916952
ASAP1	2399.26	-0.242556	0.108512	-2.23529	0.0253985	0.0392941
ASAP2	2021.76	-1.37033	0.111819	-12.2549	1.58175e-34	1.74002e-33
ASAP3	1276.88	0.568722	0.11693	4.86379	1.15162e-06	3.02211e-06
ASAP3.1	1276.88	0.568722	0.11693	4.86379	1.15162e-06	3.02211e-06
ASB1	1127.43	-0.0161252	0.137097	-0.117619	0.906369	0.92632
ASB10	0.606608	0.925937	2.51431	0.368267	0.712675	0.760375
ASB11	0.208321	-1.52038	4.08047	-0.3726	0.709446
ASB12	9.65868	-0.40049	0.726016	-0.551628	0.581203	0.642107
ASB13	406.503	0.584513	0.136641	4.27771	1.88823e-05	4.42422e-05
ASB14	24.0769	-0.994322	0.45342	-2.19294	0.0283118	0.0434825
ASB15	0.208321	-1.52038	4.08047	-0.3726	0.709446
ASB16	69.4612	-0.602025	0.291173	-2.06758	0.0386793	0.0580625
ASB17	0.256969	1.21976	4.04552	0.30151	0.763026
ASB18	0.595133	0.867791	2.81496	0.308278	0.757871	0.801093
ASB2	5.18577	2.44647	1.08185	2.26137	0.0237361	0.0369468
ASB2.1	5.18577	2.44647	1.08185	2.26137	0.0237361	0.0369468
ASB3	24.3654	0.0685959	0.479954	0.142922	0.886352	0.909276
ASB4	6.86679	4.94971	1.4232	3.47788	0.000505392	0.00100581
ASB5	0.478076	0.320154	3.49852	0.0915114	0.927086	0.942429
ASB6	690.161	-0.505515	0.118203	-4.27667	1.89707e-05	4.4432e-05
ASB7	479.474	-0.341429	0.13684	-2.4951	0.0125923	0.020589
ASB8	653.637	-1.23906	0.112501	-11.0137	3.28128e-28	2.85972e-27
ASB9	13.2688	5.90776	1.30899	4.51321	6.38534e-06	1.55756e-05
ASCC1	739.389	-0.108341	0.113999	-0.950363	0.341928	0.409154
ASCC2	944.099	0.360183	0.0992797	3.62796	0.000285674	0.000586369
ASCC3	1558.98	0.790693	0.11349	6.96705	3.23657e-12	1.29701e-11
ASCL1	1438.21	-2.89288	0.414153	-6.98505	2.84745e-12	1.14566e-11
ASCL2	7.48638	3.49886	1.08288	3.23108	0.00123323	0.00233429
ASCL3	0.412887	1.88906	3.09891	0.609589	0.542134
ASCL4	4.5929	5.36317	1.5093	3.55341	0.000380271	0.000769046
ASCL5	6.25912	-0.642992	0.799908	-0.803832	0.421494	0.48968
ASF1A	892.194	-0.587357	0.116844	-5.02686	4.98587e-07	1.34731e-06
ASF1B	412.984	0.630553	0.135184	4.66441	3.09497e-06	7.78587e-06
ASF1B.1	412.984	0.630553	0.135184	4.66441	3.09497e-06	7.78587e-06
ASGR1	401.408	0.836796	0.130025	6.43566	1.22935e-10	4.42581e-10
ASGR2	190.118	9.77586	1.19046	8.21186	2.17782e-16	1.12595e-15
ASH1L	2761.67	-1.08405	0.183991	-5.89184	3.81928e-09	1.2305e-08
ASH2L	1655.37	0.511685	0.0979101	5.22607	1.73153e-07	4.85926e-07
ASIC1	1482.22	-0.44414	0.141395	-3.14112	0.00168301	0.00312711
ASIC2	106.699	-1.07918	0.233815	-4.61553	3.92102e-06	9.76025e-06
ASIC3	162.14	-1.08	0.188536	-5.72835	1.01412e-08	3.1489e-08
ASIC4	81.5059	-0.202715	0.378655	-0.535354	0.592405	0.653239
ASIC5	0.315813	-0.558612	4.02452	-0.138802	0.889606
ASIP	5.43361	0.974987	1.03588	0.941219	0.346593	0.414048
ASL	347.193	1.63574	0.150911	10.8391	2.24675e-27	1.90371e-26
ASMT	0.562491	-1.46381	3.31337	-0.441788	0.658642	0.712013
ASMT.1	0.562491	-1.46381	3.31337	-0.441788	0.658642	0.712013
ASMTL	943.829	0.301854	0.144908	2.08307	0.0372445	0.0560396
ASMTL.1	943.829	0.301854	0.144908	2.08307	0.0372445	0.0560396
ASNS	2046.66	-0.0195989	0.0957764	-0.204632	0.83786	0.868766
ASNSD1	1206.01	-0.108728	0.117588	-0.924655	0.355145	0.423057
ASPA	1.091	3.29249	2.23385	1.47391	0.140506	0.187214
ASPDH	19.742	-0.906477	0.476251	-1.90336	0.0569935	0.0826121
ASPG	34.9226	5.06971	0.740918	6.84247	7.78394e-12	3.0401e-11
ASPH	1808.09	0.293635	0.111201	2.64057	0.00827656	0.0139391
ASPHD1	274.724	-0.305589	0.152868	-1.99904	0.0456042	0.0674783
ASPHD2	239.373	-1.83001	0.248949	-7.35094	1.96818e-13	8.53113e-13
ASPM	2411.99	0.194781	0.158424	1.22949	0.218887	0.278141
ASPN	1.37548	1.26777	1.81808	0.697315	0.485606	0.552431
ASPN.1	1.37548	1.26777	1.81808	0.697315	0.485606	0.552431
ASPRV1	63.8984	-0.853195	0.266291	-3.20399	0.00135536	0.00254591
ASPSCR1	450.303	1.10529	0.142072	7.77985	7.26133e-15	3.43449e-14
ASRGL1	860.328	-1.36922	0.196517	-6.96744	3.22749e-12	1.29365e-11
ASS1	585.875	1.83901	0.142979	12.8621	7.35779e-38	9.12599e-37
ASTE1	166.698	0.809531	0.19159	4.22533	2.38587e-05	5.53118e-05
ASTL	1.21	1.02416	1.86289	0.549772	0.582476	0.643315
ASTN1	2218.54	-2.95121	0.128775	-22.9176	3.09889e-116	1.9707e-114
ASTN2	234.672	0.731473	0.165489	4.42007	9.86695e-06	2.36673e-05
ASXL1	4743.11	-0.743798	0.106671	-6.9728	3.10684e-12	1.24669e-11
ASXL2	838.07	0.295713	0.13718	2.15567	0.0311098	0.0473914
ASXL3	1204.9	-0.478778	0.14558	-3.28877	0.00100626	0.00192595
ASZ1	0
ATAD1	1931.16	-0.533537	0.0940279	-5.67424	1.39307e-08	4.27808e-08
ATAD2	1737.77	-0.443227	0.096037	-4.61517	3.92778e-06	9.77572e-06
ATAD2B	1144.68	-0.318684	0.128254	-2.48479	0.012963	0.0211586
ATAD3A	552.279	0.495282	0.127844	3.87412	0.000107009	0.000230694
ATAD3B	387.69	0.619607	0.15021	4.12494	3.70831e-05	8.41701e-05
ATAD3C	11.978	0.653644	0.598344	1.09242	0.274647	0.339363
ATAD5	600.646	-0.151558	0.163577	-0.926522	0.354175	0.422125
ATAT1	4659.63	-2.72569	0.105756	-25.7732	1.77037e-146	1.8417e-144
ATAT1.1	4659.63	-2.72569	0.105756	-25.7732	1.77037e-146	1.8417e-144
ATAT1.2	4659.63	-2.72569	0.105756	-25.7732	1.77037e-146	1.8417e-144
ATAT1.3	4659.63	-2.72569	0.105756	-25.7732	1.77037e-146	1.8417e-144
ATAT1.4	4659.63	-2.72569	0.105756	-25.7732	1.77037e-146	1.8417e-144
ATAT1.5	4659.63	-2.72569	0.105756	-25.7732	1.77037e-146	1.8417e-144
ATAT1.6	4659.63	-2.72569	0.105756	-25.7732	1.77037e-146	1.8417e-144
ATCAY	4406.02	-3.30367	0.400541	-8.24802	1.61045e-16	8.38878e-16
ATE1	1013.94	-0.282887	0.097875	-2.89029	0.00384888	0.00681238
ATF1	352.943	0.817325	0.148976	5.4863	4.10442e-08	1.21233e-07
ATF2	2146.15	-0.491155	0.089055	-5.51518	3.48417e-08	1.03627e-07
ATF3	364.717	2.08471	0.201907	10.3251	5.42744e-25	4.15473e-24
ATF4	5164.51	0.819857	0.0939877	8.72302	2.70882e-18	1.52919e-17
ATF5	531.241	0.224541	0.116781	1.92275	0.0545111	0.0792565
ATF6	1479.57	0.128672	0.100296	1.28292	0.19952	0.256062
ATF6B	1873.18	-0.702078	0.0851759	-8.24269	1.68387e-16	8.75602e-16
ATF6B.1	1873.18	-0.702078	0.0851759	-8.24269	1.68387e-16	8.75602e-16
ATF6B.2	1873.18	-0.702078	0.0851759	-8.24269	1.68387e-16	8.75602e-16
ATF6B.3	1873.18	-0.702078	0.0851759	-8.24269	1.68387e-16	8.75602e-16
ATF7	756.226	0.0371723	0.126033	0.294941	0.768039	0.809985
ATF7IP	5200.06	-1.00548	0.0894424	-11.2417	2.54429e-29	2.30794e-28
ATF7IP2	228.203	1.68192	0.197613	8.51114	1.72224e-17	9.37827e-17
ATG10	95.0512	0.165055	0.227661	0.725003	0.46845	0.535044
ATG12	1266.65	-0.1692	0.103272	-1.63839	0.10134	0.13967
ATG13	1934.46	0.225178	0.0918683	2.45109	0.0142423	0.023073
ATG14	793.617	-0.248825	0.109111	-2.28047	0.0225796	0.0353054
ATG16L1	708.508	-0.681389	0.113112	-6.02404	1.70118e-09	5.63731e-09
ATG16L1.1	708.508	-0.681389	0.113112	-6.02404	1.70118e-09	5.63731e-09
ATG16L2	338.581	-0.6245	0.145482	-4.29263	1.7657e-05	4.14576e-05
ATG2A	651.172	0.163452	0.156652	1.04341	0.296757	0.362304
ATG2B	1395.71	-0.256254	0.132341	-1.93632	0.0528288	0.0771345
ATG3	900.289	0.0266058	0.13955	0.190654	0.848796	0.877868
ATG4A	212.486	-0.293681	0.169589	-1.73173	0.0833224	0.116769
ATG4B	1736.96	-0.153102	0.0949766	-1.612	0.106963	0.146701
ATG4C	369.976	0.343178	0.139053	2.46796	0.0135886	0.0221016
ATG4D	377.709	-0.227251	0.136865	-1.6604	0.0968346	0.134056
ATG5	603.951	0.344382	0.119176	2.88969	0.00385624	0.00682407
ATG7	320.049	0.566371	0.136651	4.14464	3.40352e-05	7.76143e-05
ATG9A	1158.99	0.0317759	0.117231	0.271053	0.78635	0.824994
ATG9B	36.0513	0.59645	0.416982	1.4304	0.152603	0.201556
ATIC	1671.35	1.36018	0.109708	12.3983	2.67086e-35	2.99859e-34
ATL1	793.266	-2.56155	0.176472	-14.5153	9.69071e-48	1.61635e-46
ATL2	1194.67	0.368911	0.09884	3.73241	0.00018966	0.000397945
ATL3	349.011	1.44048	0.153321	9.39521	5.71028e-21	3.66635e-20
ATM	2382.46	0.22991	0.15079	1.52471	0.127332	0.171552
ATMIN	2120.67	-0.57399	0.0838032	-6.84926	7.42344e-12	2.90308e-11
ATMIN.1	2120.67	-0.57399	0.0838032	-6.84926	7.42344e-12	2.90308e-11
ATN1	6789.49	-0.725303	0.102171	-7.09889	1.25767e-12	5.18538e-12
ATOH1	50.6644	8.83374	1.28346	6.88274	5.87105e-12	2.31307e-11
ATOH7	9.24781	-1.51096	0.699391	-2.16039	0.0307426	0.0468758
ATOH8	167.086	1.78053	0.187488	9.49681	2.16412e-21	1.41628e-20
ATOX1	546.648	0.596781	0.119126	5.00964	5.45306e-07	1.46936e-06
ATP10A	17.6442	2.64642	0.611338	4.3289	1.49857e-05	3.54073e-05
ATP10B	56.1527	-2.06135	0.32894	-6.26664	3.68932e-10	1.28701e-09
ATP10D	405.926	0.086213	0.201395	0.428079	0.668594	0.720908
ATP11A	1734.58	0.625308	0.146288	4.27449	1.91578e-05	4.48527e-05
ATP11B	1525.58	0.744061	0.155285	4.79157	1.65478e-06	4.27704e-06
ATP11C	967.35	0.286129	0.125199	2.2854	0.0222893	0.0348878
ATP12A	16.7563	4.73061	0.966571	4.89421	9.86991e-07	2.60148e-06
ATP13A1	1149.6	0.264495	0.119151	2.21984	0.0264298	0.040787
ATP13A2	1745.52	-0.73762	0.131778	-5.59743	2.17556e-08	6.59595e-08
ATP13A3	1789.84	0.0538269	0.111692	0.481921	0.629862	0.686218
ATP13A4	51.7314	0.339782	0.296625	1.14549	0.252004	0.314472
ATP13A5	8.43285	-0.822847	0.811757	-1.01366	0.310744	0.376723
ATP1A1	5659.03	0.067216	0.0828532	0.811265	0.417213	0.485898
ATP1A2	2068.76	0.20215	0.188955	1.06983	0.284695	0.350138
ATP1A3	4951.95	-2.48952	0.416745	-5.97374	2.31878e-09	7.62074e-09
ATP1A4	20.4928	0.679691	0.55058	1.2345	0.217016	0.276076
ATP1B1	1957.93	-0.119941	0.099603	-1.20419	0.228515	0.288541
ATP1B2	2125.47	-1.9763	0.0873041	-22.637	1.8729e-113	1.1583e-111
ATP1B3	1849.32	-0.198292	0.134866	-1.47029	0.141483	0.188291
ATP1B4	0.45069	0.266854	3.09303	0.0862759	0.931247	0.945484
ATP2A1	49.66	0.483297	0.302817	1.596	0.110489	0.150939
ATP2A2	6998.34	-0.357382	0.0907449	-3.93831	8.20574e-05	0.000179396
ATP2A3	168.847	2.69143	0.27802	9.6807	3.64231e-22	2.46061e-21
ATP2B1	2822.1	1.05541	0.169482	6.2273	4.74541e-10	1.64237e-09
ATP2B2	963.64	-3.87222	0.208152	-18.6028	3.04758e-77	1.04871e-75
ATP2B3	239.903	-2.33564	0.213999	-10.9143	9.85248e-28	8.45969e-27
ATP2B4	5342.35	-0.295035	0.165658	-1.78099	0.0749137	0.105951
ATP2C1	2743.47	-0.181493	0.0814108	-2.22934	0.0257911	0.0398731
ATP2C2	45.0305	-0.0376258	0.320045	-0.117564	0.906413	0.92632
ATP4A	4.97376	-0.42273	0.97339	-0.434286	0.664081	0.716858
ATP4B	0.499116	0.403024	3.00905	0.133937	0.893452	0.91527
ATP6AP1	2758.06	-0.329355	0.102034	-3.22788	0.0012471	0.00235707
ATP6AP2	2043.22	-0.226993	0.0990204	-2.29239	0.0218831	0.0342968
ATP6V0A1	2726.42	-1.42435	0.117938	-12.0771	1.39506e-33	1.48386e-32
ATP6V0A2	690.271	-0.031654	0.126516	-0.250198	0.802434	0.838593
ATP6V0A4	8.74453	-2.94694	0.910593	-3.23629	0.00121094	0.002295
ATP6V0B	1354.3	-0.177176	0.147585	-1.2005	0.229944	0.290081
ATP6V0C	3333.91	-0.401342	0.12819	-3.13084	0.00174308	0.00323238
ATP6V0D1	1568.93	-0.559943	0.143708	-3.89638	9.76407e-05	0.000211537
ATP6V0D2	9.98391	6.49169	1.33893	4.8484	1.24458e-06	3.25469e-06
ATP6V0E1	715.271	1.06783	0.131601	8.1141	4.89396e-16	2.48033e-15
ATP6V0E2	1998.05	-2.54158	0.224778	-11.3071	1.2108e-29	1.11347e-28
ATP6V1A	2817.24	-1.03796	0.0921407	-11.265	1.95443e-29	1.77915e-28
ATP6V1B1	30.972	0.00455491	0.424972	0.0107182	0.991448	0.993275
ATP6V1B2	2638.47	-0.520159	0.0990098	-5.25361	1.49146e-07	4.20916e-07
ATP6V1C1	1296.63	-0.645061	0.0916567	-7.03779	1.95307e-12	7.95958e-12
ATP6V1C2	33.399	-0.457476	0.414284	-1.10426	0.269481	0.33353
ATP6V1D	1280.21	-0.526027	0.116478	-4.51612	6.29815e-06	1.53755e-05
ATP6V1E1	1468.19	-0.0365496	0.122877	-0.29745	0.766123	0.808391
ATP6V1E2	75.7782	-0.691606	0.255056	-2.71159	0.00669615	0.0114293
ATP6V1F	1706.96	-0.486216	0.116015	-4.19099	2.77739e-05	6.39354e-05
ATP6V1G1	2760.94	-0.0446083	0.113226	-0.393977	0.693598	0.743061
ATP6V1G2	798.624	-1.68171	0.224544	-7.48944	6.9168e-14	3.08811e-13
ATP6V1G2.1	798.624	-1.68171	0.224544	-7.48944	6.9168e-14	3.08811e-13
ATP6V1G2.2	798.624	-1.68171	0.224544	-7.48944	6.9168e-14	3.08811e-13
ATP6V1G2.3	798.624	-1.68171	0.224544	-7.48944	6.9168e-14	3.08811e-13
ATP6V1G2.4	798.624	-1.68171	0.224544	-7.48944	6.9168e-14	3.08811e-13
ATP6V1G2.5	798.624	-1.68171	0.224544	-7.48944	6.9168e-14	3.08811e-13
ATP6V1G2.6	798.624	-1.68171	0.224544	-7.48944	6.9168e-14	3.08811e-13
ATP6V1G2-DDX39B	0
ATP6V1G3	0.783693	2.82297	2.85975	0.987139	0.323575	0.389888
ATP6V1G3.1	0.783693	2.82297	2.85975	0.987139	0.323575	0.389888
ATP6V1H	952.831	-0.624636	0.10761	-5.80464	6.45027e-09	2.04304e-08
ATP7A	517.142	0.534804	0.167996	3.18343	0.0014554	0.00272246
ATP7B	2259.13	2.83739	0.145093	19.5557	3.68811e-85	1.49493e-83
ATP8A1	1331.72	-0.769284	0.150238	-5.12044	3.0482e-07	8.3907e-07
ATP8A2	766.484	-2.94458	0.224397	-13.1222	2.45713e-39	3.17908e-38
ATP8B1	79.3005	3.64149	0.389951	9.33834	9.78578e-21	6.22533e-20
ATP8B2	1428.94	0.237107	0.114415	2.07234	0.0382341	0.0574374
ATP8B3	43.8961	1.29088	0.33941	3.80331	0.000142775	0.000303869
ATP8B4	18.1814	0.704002	0.601886	1.16966	0.242138	0.303317
ATP9A	6955.89	-2.15526	0.109667	-19.6528	5.47528e-86	2.24462e-84
ATP9B	473.114	0.363813	0.123466	2.94667	0.00321213	0.00574753
ATP9B.1	473.114	0.363813	0.123466	2.94667	0.00321213	0.00574753
ATP9B.2	473.114	0.363813	0.123466	2.94667	0.00321213	0.00574753
ATPAF1	1165.8	-0.153195	0.102578	-1.49345	0.13532	0.18108
ATPAF2	314.258	0.0700916	0.151207	0.463548	0.642971	0.697838
ATR	739.144	0.280083	0.140144	1.99854	0.0456587	0.0675521
ATRAID	1149.06	0.985871	0.126449	7.79658	6.36087e-15	3.02129e-14
ATRIP	283.411	-0.122199	0.157435	-0.776185	0.43764	0.50563
ATRN	2782.87	-0.578837	0.11476	-5.04388	4.5618e-07	1.23848e-06
ATRNL1	1353.61	-1.26655	0.0979039	-12.9366	2.79605e-38	3.5091e-37
ATRX	3877.98	-0.761752	0.146427	-5.20226	1.96883e-07	5.49519e-07
ATXN1	1142.09	-1.31833	0.154091	-8.5555	1.17363e-17	6.42784e-17
ATXN10	4080.99	-0.360473	0.110135	-3.27301	0.00106409	0.00203123
ATXN1L	1313	0.558494	0.137107	4.07342	4.63284e-05	0.000104039
ATXN2	1471.36	-0.773371	0.0998694	-7.74382	9.64719e-15	4.52019e-14
ATXN2L	4259.53	-0.0605677	0.0917969	-0.659801	0.509382	0.575116
ATXN3	537.343	0.0324076	0.130774	0.247813	0.804279	0.840006
ATXN3L	0
ATXN7	686.554	-0.471938	0.140207	-3.36601	0.000762646	0.00148174
ATXN7L1	386.819	-0.607162	0.128365	-4.72998	2.24547e-06	5.71513e-06
ATXN7L2	347.121	-0.541683	0.139456	-3.88426	0.000102643	0.000221654
ATXN7L3	2668.22	-0.321094	0.0891958	-3.59988	0.00031836	0.000649386
ATXN7L3B	6449.06	-0.609229	0.0745746	-8.16939	3.09945e-16	1.58874e-15
AUH	341.277	0.367216	0.141457	2.59596	0.00943261	0.0157563
AUNIP	116.616	0.282599	0.228547	1.2365	0.216272	0.275245
AUP1	1340.73	0.205611	0.104457	1.96839	0.0490237	0.0721582
AURKA	745.33	0.262987	0.112913	2.32911	0.0198531	0.0313692
AURKAIP1	954.543	0.782888	0.142494	5.49417	3.92556e-08	1.1616e-07
AURKB	942.249	0.398408	0.113729	3.50314	0.000459808	0.000920179
AURKC	17.8306	-0.727683	0.583173	-1.2478	0.212105	0.270439
AUTS2	5205.28	-1.88847	0.10013	-18.8603	2.42026e-79	8.65954e-78
AVEN	193.27	0.576453	0.18467	3.12153	0.00179916	0.00332815
AVIL	93.9949	-1.37514	0.236811	-5.80692	6.36338e-09	2.01587e-08
AVL9	1784.78	-0.74397	0.104171	-7.14182	9.21062e-13	3.83268e-12
AVP	7.65883	6.10369	1.374	4.44229	8.90075e-06	2.14096e-05
AVPI1	111.232	1.48477	0.247849	5.99061	2.09057e-09	6.89084e-09
AVPR1A	14.8206	4.54924	0.978239	4.65044	3.31227e-06	8.31393e-06
AVPR1B	1.97937	1.1694	1.57648	0.741776	0.458223	0.524762
AVPR2	3.00974	1.42354	1.26597	1.12446	0.260817	0.324368
AWAT1	0.402042	-2.41214	3.65572	-0.659826	0.509366
AWAT2	1.26743	0.126389	1.8087	0.0698782	0.944291	0.956353
AXDND1	2.31033	1.44497	1.58112	0.913893	0.360773	0.428974
AXIN1	875.996	0.519883	0.119455	4.35211	1.34836e-05	3.19758e-05
AXIN2	1535.6	1.62639	0.146659	11.0896	1.40911e-28	1.24251e-27
AXL	980.002	1.83278	0.150059	12.2138	2.62379e-34	2.86358e-33
AZGP1	17.5379	5.4106	1.16653	4.63822	3.51431e-06	8.79775e-06
AZI2	1248.24	-0.245183	0.106713	-2.29759	0.0215851	0.0338562
AZIN1	5234.43	-0.957637	0.077262	-12.3947	2.79308e-35	3.1319e-34
AZU1	50.0696	-0.627737	0.296334	-2.11835	0.0341459	0.0517188
AZU1.1	50.0696	-0.627737	0.296334	-2.11835	0.0341459	0.0517188
B2M	1802.28	1.53175	0.125758	12.1802	3.96449e-34	4.27239e-33
B2M.1	1802.28	1.53175	0.125758	12.1802	3.96449e-34	4.27239e-33
B3GALNT1	433.894	-0.659448	0.140459	-4.69494	2.66686e-06	6.75232e-06
B3GALNT2	668.95	0.0463461	0.115207	0.402286	0.687474	0.737818
B3GALNT2.1	668.95	0.0463461	0.115207	0.402286	0.687474	0.737818
B3GALT1	80.6856	-1.16941	0.246652	-4.74113	2.12527e-06	5.42993e-06
B3GALT2	304.916	-1.86854	0.157584	-11.8574	1.96935e-32	2.0092e-31
B3GALT4	47.2704	-0.710657	0.400885	-1.77272	0.0762754	0.107741
B3GALT4.1	47.2704	-0.710657	0.400885	-1.77272	0.0762754	0.107741
B3GALT4.2	47.2704	-0.710657	0.400885	-1.77272	0.0762754	0.107741
B3GALT4.3	47.2704	-0.710657	0.400885	-1.77272	0.0762754	0.107741
B3GALT4.4	47.2704	-0.710657	0.400885	-1.77272	0.0762754	0.107741
B3GALT5	27.6969	0.244016	0.427259	0.571119	0.567919	0.630138
B3GALT6	838.736	0.0625896	0.122488	0.510987	0.60936	0.668047
B3GAT1	1985.18	-2.11249	0.215344	-9.80985	1.02122e-22	7.09333e-22
B3GAT2	26.1424	-2.53599	0.542797	-4.67207	2.9818e-06	7.51693e-06
B3GAT3	707.602	0.284373	0.120509	2.35976	0.0182866	0.0290572
B3GNT2	277.729	1.59101	0.151389	10.5094	7.81585e-26	6.27394e-25
B3GNT3	3.36977	3.87947	1.56599	2.47732	0.0132372	0.021569
B3GNT4	16.5833	-2.48654	0.630089	-3.94633	7.93598e-05	0.000173794
B3GNT5	771.653	0.146512	0.118227	1.23925	0.215254	0.274009
B3GNT6	0.735045	1.29101	2.65001	0.487169	0.626138	0.683277
B3GNT7	65.8807	2.31406	0.361378	6.40345	1.51909e-10	5.43471e-10
B3GNT8	36.7426	2.94425	0.44229	6.65684	2.79777e-11	1.05184e-10
B3GNT9	107.386	4.05955	0.350343	11.5874	4.7764e-31	4.62404e-30
B3GNTL1	87.9326	0.729331	0.267416	2.72732	0.00638507	0.0109315
B3GNTL1.1	87.9326	0.729331	0.267416	2.72732	0.00638507	0.0109315
B4GALNT1	1217.41	-4.16274	0.187913	-22.1525	9.86089e-109	5.70632e-107
B4GALNT2	6.45314	5.86369	1.43286	4.09231	4.27105e-05	9.6215e-05
B4GALNT3	79.5813	0.951348	0.280361	3.3933	0.00069057	0.00135074
B4GALNT4	3272.72	-0.343984	0.0967825	-3.5542	0.000379135	0.000766921
B4GALT1	797.155	3.51288	0.145951	24.0688	5.3015e-128	4.0774e-126
B4GALT2	1898.36	-0.324448	0.0993754	-3.26488	0.00109512	0.00208648
B4GALT3	877.308	-0.078683	0.106187	-0.740987	0.458702	0.525244
B4GALT4	536.247	0.756706	0.122917	6.15625	7.4487e-10	2.54953e-09
B4GALT5	2189.45	-0.0214425	0.107267	-0.199898	0.841561	0.871687
B4GALT6	470.655	0.670388	0.195134	3.43553	0.000591398	0.00116614
B4GALT7	427.805	0.332789	0.135118	2.46295	0.0137801	0.0223888
B9D1	321.037	0.145984	0.138742	1.0522	0.29271	0.357971
B9D2	89.1565	-0.478917	0.238698	-2.00637	0.0448165	0.0663891
BAALC	634.494	-0.162089	0.11842	-1.36877	0.171072	0.223615
BAAT	12.4881	-0.947982	0.592108	-1.60103	0.109371	0.149545
BAAT.1	12.4881	-0.947982	0.592108	-1.60103	0.109371	0.149545
BABAM1	1367.31	-0.0549173	0.102161	-0.537558	0.590882	0.65164
BACE1	2177.25	-0.46347	0.0890515	-5.20452	1.94497e-07	5.42944e-07
BACE2	246.446	2.34458	0.182929	12.8169	1.31908e-37	1.61934e-36
BACH1	1441.25	0.138909	0.12608	1.10176	0.270567	0.334689
BACH2	2282.5	-1.90852	0.124256	-15.3596	3.05336e-53	5.86461e-52
BAD	542.189	0.226031	0.145812	1.55015	0.121105	0.163936
BAG1	993.417	-0.232112	0.112279	-2.06727	0.0387084	0.0580965
BAG2	179.227	1.08344	0.228054	4.75082	2.02593e-06	5.18792e-06
BAG3	526.113	1.37901	0.136381	10.1114	4.91672e-24	3.61611e-23
BAG4	639.891	0.168983	0.140152	1.20571	0.227929	0.287963
BAG5	1256.38	-0.779088	0.100573	-7.74647	9.4483e-15	4.42931e-14
BAG6	7495.14	-0.297761	0.0857557	-3.47221	0.000516199	0.00102584
BAG6.1	7495.14	-0.297761	0.0857557	-3.47221	0.000516199	0.00102584
BAG6.2	7495.14	-0.297761	0.0857557	-3.47221	0.000516199	0.00102584
BAG6.3	7495.14	-0.297761	0.0857557	-3.47221	0.000516199	0.00102584
BAG6.4	7495.14	-0.297761	0.0857557	-3.47221	0.000516199	0.00102584
BAG6.5	7495.14	-0.297761	0.0857557	-3.47221	0.000516199	0.00102584
BAG6.6	7495.14	-0.297761	0.0857557	-3.47221	0.000516199	0.00102584
BAHCC1	2935.17	-0.1437	0.152302	-0.943525	0.345413	0.41283
BAHCC1.1	2935.17	-0.1437	0.152302	-0.943525	0.345413	0.41283
BAHD1	1216.83	-0.287011	0.116376	-2.46624	0.013654	0.022204
BAIAP2	887.812	-0.712321	0.156314	-4.55698	5.18947e-06	1.27467e-05
BAIAP2L1	308.268	4.11954	0.226329	18.2016	5.01112e-74	1.64272e-72
BAIAP2L2	61.419	1.53622	0.309887	4.95737	7.14533e-07	1.91218e-06
BAIAP3	494.271	-0.882775	0.18077	-4.88341	1.04264e-06	2.74374e-06
BAK1	301.425	1.49749	0.154829	9.67185	3.97137e-22	2.67989e-21
BAMBI	776.779	6.10857	0.230663	26.4827	1.53419e-154	1.94443e-152
BANF1	1749.46	0.641569	0.119435	5.3717	7.79994e-08	2.25684e-07
BANF2	0.155917	0.403169	4.08047	0.0988045	0.921294
BANK1	2.84622	1.88948	1.38237	1.36684	0.171677	0.22423
BANP	367.193	0.129555	0.143761	0.901178	0.367494	0.436064
BAP1	2620.48	-0.155668	0.0869888	-1.78951	0.073532	0.104119
BARD1	462.336	0.316508	0.129992	2.43483	0.0148988	0.0240695
BARHL1	40.0264	8.49254	1.22117	6.9544	3.54074e-12	1.41575e-11
BARHL2	62.5344	2.42188	0.353542	6.85033	7.36773e-12	2.88254e-11
BARX1	4.28384	2.60669	1.27123	2.05052	0.0403133	0.060274
BARX2	7.17749	5.00214	1.38534	3.61077	0.000305291	0.000623788
BASP1	13849.1	-1.41002	0.167363	-8.42495	3.60911e-17	1.93544e-16
BATF	0.122092	0.403169	4.08047	0.0988045	0.921294
BATF2	9.38001	2.75577	0.933363	2.95252	0.00315192	0.00565104
BATF3	6.67182	0.316708	1.02178	0.309956	0.756594	0.800025
BAX	705.763	0.416771	0.131834	3.16132	0.00157056	0.00292541
BAZ1A	1313.31	-0.162847	0.107206	-1.519	0.128762	0.173064
BAZ1B	4693.54	-0.354711	0.107475	-3.30042	0.000965415	0.00185072
BAZ2A	4011.12	0.0735138	0.142511	0.515846	0.605962	0.664784
BAZ2B	2446.21	-0.76179	0.123538	-6.16646	6.98371e-10	2.39447e-09
BBC3	479.315	0.998354	0.186647	5.34887	8.85036e-08	2.54807e-07
BBIP1	365.643	-1.32266	0.145256	-9.10575	8.56739e-20	5.21079e-19
BBOX1	5.42623	0.794196	0.994418	0.798655	0.424491	0.492525
BBS1	1257.79	-0.30011	0.09386	-3.19742	0.00138661	0.00260136
BBS10	691.14	0.232626	0.123632	1.8816	0.0598903	0.0865183
BBS12	177.981	0.500012	0.180571	2.76906	0.00562191	0.00968947
BBS2	1327.57	-0.506655	0.0943912	-5.36761	7.97887e-08	2.30528e-07
BBS4	837.508	0.147363	0.105055	1.40273	0.160699	0.211132
BBS5	330.943	-0.299064	0.143546	-2.08341	0.0372141	0.0560125
BBS7	674.49	-0.642692	0.105841	-6.07227	1.26116e-09	4.23452e-09
BBS9	553.502	-0.258775	0.128769	-2.00961	0.0444728	0.0659235
BBX	2069.14	0.567536	0.126389	4.49038	7.10962e-06	1.72512e-05
BCAM	1330.39	3.23128	0.12703	25.4372	9.77484e-143	9.77321e-141
BCAN	963.456	-2.19933	0.249359	-8.81994	1.14517e-18	6.58243e-18
BCAP29	788.081	0.262445	0.124397	2.10975	0.0348802	0.0527556
BCAP29.1	788.081	0.262445	0.124397	2.10975	0.0348802	0.0527556
BCAP31	1395.1	0.742428	0.120876	6.14207	8.14548e-10	2.77536e-09
BCAR1	1650.39	0.830208	0.147064	5.64523	1.64964e-08	5.03733e-08
BCAR3	433.932	2.28365	0.200445	11.3929	4.53527e-30	4.2489e-29
BCAS1	10.1006	0.220984	0.660616	0.334512	0.737993	0.783163
BCAS2	1016.8	-0.345206	0.118567	-2.91147	0.00359729	0.00639034
BCAS3	698.695	0.2562	0.108504	2.36121	0.0182155	0.0289546
BCAS4	184.182	-0.117687	0.165703	-0.710226	0.477564	0.544314
BCAT1	3833.26	1.45138	0.125984	11.5203	1.04193e-30	9.97953e-30
BCAT2	560.047	1.21194	0.122443	9.89802	4.24601e-23	2.99434e-22
BCCIP	1676.76	0.0715944	0.0976086	0.733484	0.463263	0.529826
BCDIN3D	126.394	-0.569575	0.215982	-2.63714	0.0083609	0.0140693
BCHE	665.507	0.615277	0.123692	4.97428	6.5492e-07	1.75762e-06
BCKDHA	933.887	0.299388	0.119052	2.51477	0.011911	0.0195496
BCKDHB	519.404	1.17914	0.146634	8.04138	8.88303e-16	4.43585e-15
BCKDK	774.27	0.382438	0.109598	3.48947	0.000483982	0.000965336
BCL10	304.332	-0.507918	0.159005	-3.19435	0.00140144	0.00262797
BCL11A	2460.89	-3.55857	0.139572	-25.4963	2.16824e-143	2.17999e-141
BCL11B	2943.38	-5.12895	0.110485	-46.4221	0	0
BCL2	461.788	0.718976	0.173405	4.14622	3.38014e-05	7.71201e-05
BCL2A1	0.278009	1.3162	4.0367	0.326058	0.74438
BCL2L1	2228.18	-1.54008	0.102768	-14.9859	9.07566e-51	1.65486e-49
BCL2L10	1.79482	-1.89275	1.76859	-1.0702	0.284529	0.349995
BCL2L11	501.934	0.775473	0.139028	5.57781	2.43563e-08	7.35654e-08
BCL2L12	321.291	3.00704	0.185094	16.2461	2.38182e-59	5.32493e-58
BCL2L13	1192	-0.00765789	0.0926199	-0.0826808	0.934105	0.947775
BCL2L14	16.3725	0.253382	0.505012	0.501734	0.615854	0.674099
BCL2L14.1	16.3725	0.253382	0.505012	0.501734	0.615854	0.674099
BCL2L15	39.4148	-3.80346	0.471169	-8.07238	6.894e-16	3.46568e-15
BCL2L2	736.467	0.236086	0.123681	1.90883	0.0562836	0.081616
BCL2L2-PABPN1	0
BCL3	66.407	1.48481	0.288621	5.14449	2.68242e-07	7.4099e-07
BCL6	549.663	-0.111997	0.120972	-0.925813	0.354543	0.422424
BCL6B	15.4966	6.13811	1.27534	4.81294	1.48726e-06	3.86238e-06
BCL7A	2144.49	-0.875048	0.105611	-8.28559	1.17527e-16	6.17017e-16
BCL7B	630.137	-0.409209	0.132196	-3.09547	0.00196503	0.00361972
BCL7C	309.985	-0.0357682	0.15653	-0.228507	0.819252	0.853245
BCL9	3166.53	-0.518123	0.110803	-4.67606	2.92441e-06	7.37949e-06
BCL9L	2367.98	0.0226403	0.138954	0.162934	0.87057	0.89575
BCLAF1	4893.85	-0.245061	0.0953835	-2.56922	0.0101928	0.0169366
BCO2	85.1239	1.15017	0.248247	4.63315	3.6014e-06	9.00076e-06
BCOR	2228.03	-0.73429	0.111165	-6.60543	3.96356e-11	1.47625e-10
BCORL1	1395.65	0.209984	0.130554	1.6084	0.107747	0.147698
BCR	2555.75	-0.793705	0.150159	-5.28578	1.25171e-07	3.55587e-07
BCS1L	549.682	-0.190635	0.120641	-1.58019	0.114063	0.15515
BDH1	193.891	0.102668	0.161696	0.634945	0.525464	0.590047
BDH1.1	193.891	0.102668	0.161696	0.634945	0.525464	0.590047
BDH2	928.279	1.47876	0.145097	10.1915	2.16354e-24	1.61565e-23
BDKRB1	4.31489	5.27323	1.53698	3.43092	0.000601544	0.0011855
BDKRB2	68.8415	5.79972	0.65713	8.82583	1.0865e-18	6.24919e-18
BDNF	59.6761	1.53462	0.399479	3.84154	0.000122263	0.000262168
BDP1	2039.04	-0.646459	0.14978	-4.31606	1.5884e-05	3.74314e-05
BDP1.1	2039.04	-0.646459	0.14978	-4.31606	1.5884e-05	3.74314e-05
BDP1.2	2039.04	-0.646459	0.14978	-4.31606	1.5884e-05	3.74314e-05
BEAN1	44.9265	-0.245962	0.325464	-0.755729	0.449812	0.517038
BECN1	550.837	-0.227344	0.121171	-1.87622	0.0606256	0.0875104
BEGAIN	341.782	-2.51413	0.149099	-16.8622	8.53283e-64	2.14777e-62
BEND2	0.349639	-0.558614	3.88102	-0.143935	0.885552
BEND3	652.807	-0.382606	0.114023	-3.3555	0.000792208	0.00153602
BEND4	217.546	-1.59618	0.225085	-7.09146	1.32703e-12	5.46761e-12
BEND5	576.68	-0.508025	0.12269	-4.14073	3.46197e-05	7.88671e-05
BEND6	91.1925	-0.344189	0.259183	-1.32797	0.184187	0.238504
BEND7	460.782	-0.822621	0.167419	-4.91353	8.94496e-07	2.36635e-06
BEST1	86.1649	-0.627195	0.264968	-2.36705	0.0179303	0.0285568
BEST2	7.36824	0.0318805	1.10131	0.0289478	0.976906	0.982036
BEST3	36.2481	-5.70465	0.728185	-7.83407	4.72327e-15	2.25656e-14
BEST4	13.9915	0.845901	0.615696	1.37389	0.169475	0.221789
BET1	549.741	1.02011	0.170472	5.98399	2.17732e-09	7.16891e-09
BET1L	978.99	1.23296	0.099736	12.3623	4.1827e-35	4.65818e-34
BEX1	2241.19	-1.2812	0.162428	-7.88778	3.07607e-15	1.48777e-14
BEX2	1002.81	-1.37411	0.132205	-10.3938	2.64557e-25	2.05669e-24
BEX4	2679.53	-0.905864	0.104917	-8.63414	5.91721e-18	3.27668e-17
BEX5	236.48	-1.22288	0.16419	-7.448	9.47648e-14	4.1914e-13
BEX5.1	236.48	-1.22288	0.16419	-7.448	9.47648e-14	4.1914e-13
BFAR	1189.74	0.435918	0.0943669	4.61939	3.84862e-06	9.5973e-06
BFAR.1	1189.74	0.435918	0.0943669	4.61939	3.84862e-06	9.5973e-06
BFSP1	48.9182	-0.389726	0.303301	-1.28495	0.19881	0.255261
BFSP2	0.595133	0.867791	2.81496	0.308278	0.757871	0.801093
BGLAP	2.35589	0.918724	1.33847	0.6864	0.492461	0.559239
BGN	467.807	7.36236	0.414578	17.7587	1.47689e-70	4.39332e-69
BHLHA15	1.8525	0.396379	1.57007	0.25246	0.800686	0.837009
BHLHA9	0.155917	0.403169	4.08047	0.0988045	0.921294
BHLHE22	158.51	-3.23377	0.231475	-13.9703	2.36732e-44	3.64766e-43
BHLHE23	4.98378	1.62597	1.1575	1.40472	0.160105	0.210383
BHLHE40	193.268	1.5666	0.176777	8.86206	7.85517e-19	4.55443e-18
BHLHE41	15.1733	1.68363	0.592717	2.84053	0.0045039	0.00786958
BHMT	18.6858	2.75627	0.605514	4.55195	5.31521e-06	1.30431e-05
BHMT2	0.605329	-3.00169	2.75044	-1.09135	0.27512	0.339807
BICC1	209.058	0.0509676	0.28272	0.180276	0.856936	0.884406
BICD1	2008.57	-1.2315	0.092933	-13.2515	4.42351e-40	5.88396e-39
BICD2	1574.2	-0.229878	0.123252	-1.86511	0.0621665	0.0894905
BID	469.355	-0.41707	0.145716	-2.86221	0.00420697	0.00739527
BIK	24.2522	0.899727	0.438444	2.05209	0.0401609	0.0600712
BIN1	2038.78	0.843859	0.0892647	9.45345	3.2785e-21	2.12701e-20
BIN2	3.48169	3.92479	1.61484	2.43045	0.0150802	0.0243297
BIN3	287.92	1.30291	0.148642	8.76537	1.86163e-18	1.05991e-17
BIRC2	1916.32	-0.115455	0.10551	-1.09426	0.273843	0.338485
BIRC3	72.8761	4.98519	0.576512	8.64715	5.2801e-18	2.93019e-17
BIRC5	1760.6	-0.332228	0.100243	-3.31423	0.000918949	0.00176578
BIRC6	3391.33	-0.0789282	0.150839	-0.523262	0.600792	0.660747
BIRC7	9.10352	3.80786	1.06376	3.57961	0.000344108	0.000699527
BIVM	654.491	-1.32651	0.143722	-9.22972	2.71329e-20	1.69082e-19
BIVM-ERCC5	0
BLACAT1	120.921	0.288654	0.24259	1.18989	0.234091	0.294446
BLCAP	5108.88	-2.63965	0.109799	-24.0407	1.0438e-127	7.92624e-126
BLID	0
BLK	0
BLK.1	0
BLM	625.495	0.453019	0.124078	3.65109	0.000261132	0.000538327
BLMH	1501.06	0.579262	0.0917621	6.31265	2.74302e-10	9.6607e-10
BLNK	14.1394	0.397737	0.577169	0.689117	0.49075	0.557612
BLOC1S1	129.584	0.175866	0.237456	0.740625	0.458921	0.525394
BLOC1S2	918.613	-0.389831	0.140333	-2.7779	0.00547121	0.00944332
BLOC1S3	225.303	-0.350857	0.15339	-2.28736	0.0221747	0.0347236
BLOC1S4	280.931	0.484787	0.177528	2.73076	0.00631888	0.0108244
BLOC1S5	0
BLOC1S5-TXNDC5	0
BLOC1S6	1743.09	-0.592788	0.0967576	-6.12653	8.98183e-10	3.05223e-09
BLVRA	424.077	-0.487699	0.16021	-3.04413	0.00233356	0.00425503
BLVRB	348.786	1.67379	0.146725	11.4077	3.82708e-30	3.59291e-29
BLZF1	275.428	0.210294	0.156234	1.34602	0.178296	0.231766
BMF	1613.17	2.66763	0.109941	24.2641	4.69179e-130	3.80352e-128
BMI1	71.4079	0.171835	0.281227	0.61102	0.541186	0.606081
BMP1	735.951	2.87475	0.130733	21.9895	3.62931e-107	2.05398e-105
BMP10	2.21582	4.31189	1.81573	2.37474	0.0175613	0.0280038
BMP15	0
BMP2	242.393	3.04539	0.201562	15.1089	1.4143e-51	2.61864e-50
BMP2K	559.151	-0.0482414	0.137199	-0.351615	0.725127	0.771693
BMP3	14.8571	0.68278	0.60752	1.12388	0.261064	0.324562
BMP4	1116.32	9.43224	0.528337	17.8527	2.75365e-71	8.42814e-70
BMP5	546.006	8.58988	0.574254	14.9583	1.37428e-50	2.49576e-49
BMP6	43.2573	-0.686009	0.348984	-1.96573	0.0493297	0.0725613
BMP7	1294.34	0.173586	0.116184	1.49407	0.135157	0.18089
BMP8A	80.2157	-0.831288	0.258832	-3.21169	0.00131957	0.00248258
BMP8B	63.0562	-0.778212	0.30007	-2.59344	0.0095022	0.0158682
BMPER	79.801	1.34132	0.259044	5.17799	2.24295e-07	6.23708e-07
BMPR1A	752.568	0.53167	0.115424	4.60624	4.10023e-06	1.01866e-05
BMPR1B	225.882	-0.446504	0.170559	-2.6179	0.0088474	0.0148394
BMPR2	2632.97	-1.03206	0.121833	-8.47107	2.43148e-17	1.31567e-16
BMS1	1511.4	0.533678	0.102744	5.19426	2.05533e-07	5.72864e-07
BMX	0.717225	1.26194	2.62756	0.480271	0.631035	0.687329
BNC1	819.516	9.17849	0.593157	15.474	5.20067e-54	1.01957e-52
BNC2	888.935	7.77752	0.359347	21.6435	6.99671e-104	3.6393e-102
BNIP1	212.974	0.0163017	0.180349	0.0903893	0.927978	0.943069
BNIP2	1193.73	-0.41829	0.116456	-3.59183	0.000328361	0.000668951
BNIP3	1400.61	0.570318	0.131433	4.33924	1.42977e-05	3.38528e-05
BNIP3L	3140.44	0.397252	0.0982739	4.04229	5.29311e-05	0.000118306
BNIPL	18.0438	1.61397	0.568303	2.83999	0.00451153	0.00788138
BOC	1668.39	0.863431	0.116129	7.43511	1.04483e-13	4.61218e-13
BOD1	2367.64	0.566314	0.105328	5.37666	7.58802e-08	2.19764e-07
BOD1L1	2556.76	-0.249118	0.148731	-1.67495	0.0939435	0.130385
BOD1L2	0
BOK	196.773	0.796281	0.172361	4.61984	3.84041e-06	9.57947e-06
BOLA1	110.398	-0.118428	0.209705	-0.564738	0.572252	0.634203
BOLA2	58.5309	1.58168	0.306654	5.15788	2.49758e-07	6.92267e-07
BOLA2B	7.05361	0.428669	0.829377	0.516856	0.605257	0.664236
BOLA3	190.294	0.423512	0.188808	2.24309	0.0248913	0.0386169
BOLL	0.256969	1.21976	4.04552	0.30151	0.763026
BOP1	904.469	0.31248	0.153341	2.03781	0.0415694	0.0619821
BORA	371.873	0.33984	0.133257	2.55027	0.0107641	0.0178118
BPGM	578.163	-0.1231	0.124367	-0.989816	0.322264	0.388699
BPHL	581.567	0.0569514	0.111781	0.509489	0.610409	0.669075
BPI	1.27249	3.50768	2.09317	1.67577	0.0937832	0.130182
BPIFA1	0
BPIFA2	0
BPIFA3	0
BPIFB1	0.330412	-0.558613	3.95989	-0.141068	0.887816
BPIFB2	1.06996	3.2688	2.20118	1.48502	0.137538	0.183748
BPIFB3	0
BPIFB4	0
BPIFB6	0
BPIFC	4.43102	-5.87407	1.50391	-3.90586	9.38905e-05	0.000203903
BPNT1	503.974	0.257111	0.156841	1.63931	0.101149	0.13946
BPTF	4732.25	-0.557729	0.125913	-4.42948	9.44604e-06	2.26849e-05
BPY2	0
BPY2B	0
BPY2C	0
BRAF	1639.71	-0.930089	0.107227	-8.67406	4.16984e-18	2.32841e-17
BRAP	839.011	-0.270726	0.119774	-2.2603	0.0238023	0.0370339
BRAT1	1009.93	0.316283	0.104204	3.03523	0.00240349	0.00437633
BRCA1	770.723	0.0130182	0.110787	0.117507	0.906459	0.92632
BRCA2	384.129	0.441011	0.164387	2.68275	0.00730188	0.0124044
BRCC3	608.758	-0.260773	0.11209	-2.32646	0.0199938	0.0315778
BRD1	2099.8	-0.493287	0.109286	-4.51372	6.36997e-06	1.55424e-05
BRD2	7712.34	-0.482956	0.0870172	-5.55011	2.85483e-08	8.56878e-08
BRD2.1	7712.34	-0.482956	0.0870172	-5.55011	2.85483e-08	8.56878e-08
BRD2.2	7712.34	-0.482956	0.0870172	-5.55011	2.85483e-08	8.56878e-08
BRD2.3	7712.34	-0.482956	0.0870172	-5.55011	2.85483e-08	8.56878e-08
BRD2.4	7712.34	-0.482956	0.0870172	-5.55011	2.85483e-08	8.56878e-08
BRD2.5	7712.34	-0.482956	0.0870172	-5.55011	2.85483e-08	8.56878e-08
BRD2.6	7712.34	-0.482956	0.0870172	-5.55011	2.85483e-08	8.56878e-08
BRD3	2416.46	-0.64262	0.138017	-4.65608	3.22287e-06	8.09744e-06
BRD4	2378.43	-0.156461	0.141493	-1.10579	0.268818	0.332754
BRD7	1974.08	0.312234	0.093339	3.34516	0.000822354	0.00159105
BRD8	2632.47	-0.591625	0.0956276	-6.18676	6.14137e-10	2.11129e-09
BRD9	1156.69	-0.28032	0.107248	-2.61376	0.00895522	0.0150104
BRDT	3.71272	2.39369	1.55459	1.53976	0.123618	0.167061
BRF1	1184.1	-0.760321	0.119813	-6.34591	2.21115e-10	7.8273e-10
BRF2	332.424	0.153088	0.147749	1.03613	0.30014	0.365938
BRI3	928.754	0.646615	0.127303	5.07935	3.78721e-07	1.03553e-06
BRI3BP	86.7726	-0.139911	0.271541	-0.515248	0.606379	0.665184
BRICD5	164.341	-0.603882	0.194267	-3.10852	0.0018803	0.00347252
BRINP1	350.234	-0.56506	0.20384	-2.77208	0.0055699	0.00960443
BRINP2	629.183	-4.56301	0.179895	-25.3648	6.17465e-142	6.07242e-140
BRINP3	93.9363	-1.43883	0.2338	-6.15411	7.54989e-10	2.58073e-09
BRIP1	564.918	0.441734	0.152613	2.89446	0.00379808	0.00672577
BRIX1	691.733	0.376824	0.130624	2.88481	0.00391652	0.00691985
BRK1	2791.3	0.302016	0.118526	2.54809	0.0108313	0.0179181
BRMS1	545.074	0.468699	0.140321	3.3402	0.000837186	0.00161627
BRMS1L	502.934	-0.600158	0.144057	-4.16612	3.09823e-05	7.09671e-05
BROX	839.973	-0.353627	0.111562	-3.16978	0.00152553	0.00284566
BRPF1	866.023	-0.121083	0.114839	-1.05437	0.291712	0.357214
BRPF3	2121.1	-0.14187	0.123759	-1.14634	0.251654	0.314101
BRS3	6.1064	-1.36905	0.895296	-1.52916	0.126224	0.170225
BRSK1	2514.82	-1.90897	0.149698	-12.7521	3.03377e-37	3.66681e-36
BRSK2	1487.11	-2.26819	0.486288	-4.66431	3.09661e-06	7.78782e-06
BRSK2.1	1487.11	-2.26819	0.486288	-4.66431	3.09661e-06	7.78782e-06
BRWD1	3285.77	-0.71162	0.120243	-5.9182	3.25489e-09	1.05604e-08
BRWD3	1569.84	0.0404973	0.15056	0.268978	0.787946	0.826283
BSCL2	19.5866	-0.678053	0.498071	-1.36136	0.173401	0.226268
BSDC1	2276.15	-0.765852	0.0860249	-8.90268	5.45128e-19	3.18632e-18
BSG	8882.4	1.26884	0.107052	11.8525	2.08865e-32	2.12851e-31
BSN	1640.22	-2.68387	0.237401	-11.3052	1.23691e-29	1.13691e-28
BSND	6.15947	5.78936	1.40592	4.11783	3.82452e-05	8.67313e-05
BSPH1	0
BSPRY	21.0002	5.67064	1.10944	5.11129	3.19971e-07	8.78358e-07
BST1	29.7353	1.47056	0.408996	3.59555	0.000323708	0.000659771
BST2	1376.34	6.81555	0.249424	27.3252	2.12943e-164	3.14126e-162
BSX	0.193721	-1.52038	4.08047	-0.3726	0.709446
BTAF1	2594.15	0.342668	0.113233	3.02623	0.00247624	0.00450515
BTBD1	2029.77	-0.60633	0.0972808	-6.23278	4.58235e-10	1.58685e-09
BTBD10	1137.26	-0.938952	0.122322	-7.67604	1.6408e-14	7.59308e-14
BTBD16	1.27702	3.51554	2.47321	1.42145	0.155186	0.204622
BTBD17	325.31	1.03035	0.318897	3.231	0.0012336	0.00233474
BTBD18	5.17557	-1.48172	0.961955	-1.54032	0.123483	0.166891
BTBD19	46.5063	1.55081	0.363005	4.27214	1.93606e-05	4.53099e-05
BTBD2	2733.71	-0.273787	0.11789	-2.3224	0.0202115	0.031874
BTBD3	2001.16	0.350526	0.0942601	3.71871	0.000200239	0.000419261
BTBD6	733.956	-0.871725	0.103875	-8.39206	4.77705e-17	2.55263e-16
BTBD7	1152.13	0.143369	0.14764	0.971077	0.33151	0.398277
BTBD7.1	1152.13	0.143369	0.14764	0.971077	0.33151	0.398277
BTBD8	21.8369	0.0451231	0.457492	0.0986315	0.921431	0.937634
BTBD9	713.978	-1.1778	0.141452	-8.32649	8.32754e-17	4.39246e-16
BTC	0.973437	3.12521	2.32776	1.34258	0.179406	0.233091
BTD	219.75	1.15383	0.163399	7.0614	1.64828e-12	6.74492e-12
BTF3	7718.25	0.478645	0.121645	3.93476	8.32797e-05	0.000181825
BTF3L4	2798.83	-0.6366	0.123864	-5.13952	2.75443e-07	7.60065e-07
BTG1	2403.49	-0.406947	0.121935	-3.33741	0.000845624	0.00163081
BTG2	917.43	0.235216	0.118843	1.97923	0.0477906	0.0704644
BTG3	835.998	-0.102488	0.134223	-0.763564	0.445127	0.512701
BTG3.1	835.998	-0.102488	0.134223	-0.763564	0.445127	0.512701
BTG4	0.244183	1.15671	4.0516	0.285495	0.775265
BTK	11.4945	1.78259	0.737699	2.41641	0.0156743	0.0252305
BTLA	8.26035	1.27773	0.829054	1.5412	0.123269	0.16664
BTN1A1	6.00284	1.18159	0.890946	1.32622	0.184768	0.239143
BTN1A1.1	6.00284	1.18159	0.890946	1.32622	0.184768	0.239143
BTN2A1	945.701	-0.636946	0.10527	-6.05062	1.44289e-09	4.81777e-09
BTN2A1.1	945.701	-0.636946	0.10527	-6.05062	1.44289e-09	4.81777e-09
BTN2A2	328.516	0.787603	0.144325	5.45716	4.83808e-08	1.42087e-07
BTN3A1	710.225	-1.29722	0.134391	-9.65259	4.79316e-22	3.21875e-21
BTN3A2	121.967	0.380763	0.256496	1.48448	0.137681	0.183885
BTN3A3	99.207	0.243982	0.261564	0.932785	0.350931	0.418675
BTNL2	2.48015	0.569406	1.34289	0.424015	0.671555	0.723408
BTNL2.1	2.48015	0.569406	1.34289	0.424015	0.671555	0.723408
BTNL2.2	2.48015	0.569406	1.34289	0.424015	0.671555	0.723408
BTNL2.3	2.48015	0.569406	1.34289	0.424015	0.671555	0.723408
BTNL2.4	2.48015	0.569406	1.34289	0.424015	0.671555	0.723408
BTNL2.5	2.48015	0.569406	1.34289	0.424015	0.671555	0.723408
BTNL2.6	2.48015	0.569406	1.34289	0.424015	0.671555	0.723408
BTNL2.7	2.48015	0.569406	1.34289	0.424015	0.671555	0.723408
BTNL2.8	2.48015	0.569406	1.34289	0.424015	0.671555	0.723408
BTNL3	0
BTNL8	0.134877	0.403169	4.08047	0.0988045	0.921294
BTNL9	47.608	-0.0535014	0.668845	-0.0799907	0.936245	0.949794
BTRC	1656.55	-0.881911	0.0928854	-9.49462	2.2102e-21	1.44591e-20
BUB1	1489.77	-0.0787816	0.0942642	-0.835753	0.403294	0.472101
BUB1B	1583.92	0.0883321	0.0868324	1.01727	0.309024	0.374992
BUB3	2310.76	0.275025	0.0979522	2.80775	0.00498896	0.00865577
BUD13	715.505	-0.107262	0.106952	-1.0029	0.31591	0.382111
BUD31	648.016	-0.534025	0.129131	-4.13554	3.54127e-05	8.05922e-05
BVES	210.742	1.22631	0.167976	7.30053	2.86637e-13	1.23088e-12
BYSL	496.481	0.504217	0.131222	3.84247	0.000121803	0.000261243
BZW1	2839.6	0.132472	0.0909645	1.4563	0.145309	0.193013
BZW2	2337.34	-0.226834	0.101222	-2.24096	0.0250289	0.0388081
C10orf105	23.1848	-0.930482	0.512051	-1.81717	0.0691918	0.0985162
C10orf120	0
C10orf53	0.481296	0.350957	3.03813	0.115517	0.908035	0.92632
C10orf62	0.56055	2.32892	3.24813	0.717004	0.473371	0.540014
C10orf67	5.34784	0.689772	1.01953	0.676559	0.498686	0.565416
C10orf71	1.51992	1.44014	1.7853	0.806666	0.419859	0.488129
C10orf88	352.147	-0.0268676	0.153415	-0.17513	0.860977	0.887458
C10orf90	3.62021	-1.0261	1.12283	-0.913848	0.360797	0.428974
C10orf95	12.9625	1.134	0.716053	1.58368	0.113266	0.154229
C11orf16	1.64083	0.069491	1.61838	0.0429387	0.96575	0.974086
C11orf21	4.70472	3.40048	1.38019	2.46378	0.0137479	0.0223386
C11orf24	628.557	0.830748	0.125936	6.59661	4.20668e-11	1.56195e-10
C11orf42	14.6198	0.102886	0.542295	0.189724	0.849526	0.878471
C11orf52	0
C11orf54	750.771	0.38418	0.110877	3.46491	0.000530405	0.00105071
C11orf58	3827.17	0.330095	0.107589	3.06812	0.00215413	0.00394704
C11orf65	11.8575	0.749496	0.593605	1.26262	0.206727	0.264219
C11orf68	705.626	0.134742	0.115392	1.16769	0.242931	0.304226
C11orf71	302.274	-0.433986	0.140419	-3.09064	0.00199724	0.00367455
C11orf86	4.04508	4.1456	1.53928	2.69321	0.00707672	0.0120437
C11orf87	617.644	-4.19749	0.152888	-27.4547	6.11161e-166	9.16589e-164
C11orf91	5.88786	-0.429489	0.866008	-0.495942	0.619935	0.6777
C11orf96	371.339	-1.76969	0.224687	-7.87624	3.37391e-15	1.62745e-14
C12orf42	2.00313	1.21935	1.52621	0.798941	0.424325	0.492417
C12orf43	497.167	0.0247869	0.116978	0.211893	0.83219	0.86432
C12orf50	1.72985	-3.42562	1.95639	-1.75099	0.0799468	0.112503
C12orf54	2.67404	2.46731	1.51482	1.62879	0.103358	0.142168
C12orf56	2.33311	0.94255	1.61653	0.58307	0.559846	0.623396
C12orf57	1899.92	0.278365	0.116963	2.37994	0.0173155	0.0276339
C12orf60	34.2831	0.532584	0.402167	1.32429	0.185408	0.239918
C12orf71	1.29998	-1.88872	1.88039	-1.00443	0.315171	0.381397
C12orf75	281.418	0.262611	0.158487	1.65699	0.0975219	0.134894
C12orf76	566.662	-0.571061	0.124084	-4.60223	4.17996e-06	1.03732e-05
C14orf119	639.744	0.818413	0.134018	6.10674	1.01687e-09	3.44515e-09
C14orf132	6371.85	-0.215801	0.161093	-1.3396	0.180374	0.234196
C14orf180	0.720445	1.29088	2.6654	0.48431	0.628166	0.684643
C14orf180.1	0.720445	1.29088	2.6654	0.48431	0.628166	0.684643
C14orf28	132.605	0.161714	0.213678	0.756812	0.449163	0.51649
C14orf39	25.6855	5.36673	0.995434	5.39135	6.99314e-08	2.03321e-07
C14orf93	242.282	0.530119	0.155885	3.4007	0.000672124	0.00131667
C15orf39	568.877	2.07746	0.168369	12.3388	5.60088e-35	6.2145e-34
C15orf40	275.98	-0.084473	0.150223	-0.562317	0.5739	0.635642
C15orf48	2.67492	2.47248	1.60215	1.54322	0.122777	0.165999
C15orf61	50.9367	-0.251226	0.297166	-0.845406	0.397884	0.467258
C15orf62	71.357	-0.0354249	0.276693	-0.12803	0.898125	0.919011
C16orf46	107.433	-0.556518	0.217992	-2.55293	0.0106822	0.017691
C16orf46.1	107.433	-0.556518	0.217992	-2.55293	0.0106822	0.017691
C16orf54	1.40241	3.66724	2.1284	1.723	0.0848883	0.118862
C16orf74	56.251	1.35978	0.311285	4.36826	1.25238e-05	2.97861e-05
C16orf78	0.411608	-2.44083	3.62775	-0.67282	0.501062
C16orf82	1.90799	1.09966	1.58969	0.691745	0.489097	0.555945
C16orf86	47.3234	0.0175103	0.322164	0.0543519	0.956655	0.966374
C16orf87	346.803	-0.288146	0.141208	-2.04058	0.0412926	0.0616153
C16orf89	5.25405	1.75179	0.966952	1.81166	0.070039	0.0996121
C16orf90	1.62176	-4.42257	2.10172	-2.10426	0.0353558	0.0534242
C16orf92	0
C16orf95	47.1031	0.942806	0.321666	2.93101	0.00337859	0.00601966
C16orf96	40.5171	0.242577	0.334255	0.725724	0.468008	0.534573
C17orf100	244.738	-0.768181	0.177047	-4.33884	1.43237e-05	3.39056e-05
C17orf107	14.6658	2.6615	0.684295	3.8894	0.000100494	0.000217456
C17orf49	0
C17orf50	5.28412	-0.407356	0.887887	-0.458793	0.646383	0.700738
C17orf58	348.717	-0.243298	0.139305	-1.74652	0.0807211	0.113451
C17orf67	51.9517	0.548343	0.303099	1.80912	0.0704319	0.100108
C17orf75	805.988	-0.375377	0.111828	-3.35675	0.000788657	0.00152996
C17orf78	1.53656	-0.152474	1.69622	-0.0898906	0.928374	0.943206
C17orf78.1	1.53656	-0.152474	1.69622	-0.0898906	0.928374	0.943206
C17orf99	0.278009	1.3162	4.0367	0.326058	0.74438
C18orf21	395.021	-0.0848465	0.147365	-0.575757	0.56478	0.627661
C18orf32	48.0481	0.570454	0.360918	1.58056	0.113978	0.155046
C18orf54	602.596	0.163305	0.129586	1.26021	0.207593	0.265194
C18orf63	2.10279	4.23507	1.84797	2.29174	0.0219205	0.0343465
C19orf12	861.78	-0.708871	0.100587	-7.04737	1.82334e-12	7.44941e-12
C19orf18	10.5099	-0.805399	0.655786	-1.22814	0.219394	0.278687
C19orf25	407.03	0.441335	0.129894	3.39765	0.000679676	0.00133088
C19orf33	0
C19orf38	10.1175	1.22887	0.663078	1.85329	0.0638409	0.0916589
C19orf44	214.923	-0.6178	0.175305	-3.52415	0.000424837	0.000853992
C19orf47	288.693	0.0079364	0.144691	0.0548506	0.956258	0.966081
C19orf53	994.586	0.0644534	0.11896	0.541809	0.58795	0.648803
C19orf67	1.02275	-0.563795	2.16865	-0.259975	0.794883	0.832732
C19orf67.1	1.02275	-0.563795	2.16865	-0.259975	0.794883	0.832732
C19orf73	17.6637	-0.408388	0.602581	-0.677732	0.497942	0.564608
C19orf81	113.659	-4.47615	0.326448	-13.7117	8.64413e-43	1.26924e-41
C19orf84	2.20832	3.21371	1.71661	1.87212	0.0611901	0.0882331
C1D	239.152	0.909933	0.190202	4.78403	1.71819e-06	4.43393e-06
C1GALT1	625.77	0.81398	0.183738	4.4301	9.41898e-06	2.26229e-05
C1GALT1C1	242.149	0.515251	0.15269	3.37449	0.000739527	0.00143931
C1GALT1C1.1	242.149	0.515251	0.15269	3.37449	0.000739527	0.00143931
C1orf105	0.935079	3.07426	2.34467	1.31117	0.189801	0.244828
C1orf115	211.439	2.25709	0.189369	11.919	9.42192e-33	9.72628e-32
C1orf116	51.2138	3.62836	0.459659	7.89359	2.93618e-15	1.42164e-14
C1orf122	614.12	0.44014	0.153796	2.86185	0.00421177	0.007403
C1orf127	1.46546	-1.27247	1.90333	-0.66855	0.503783	0.569652
C1orf131	292.07	-0.135936	0.165007	-0.823819	0.410043	0.478538
C1orf141	1.70678	-1.2194	1.62146	-0.752035	0.45203	0.518891
C1orf146	2.07114	-2.72994	1.69989	-1.60595	0.108285	0.1483
C1orf159	335.421	-0.0520096	0.144206	-0.360663	0.718351	0.765569
C1orf162	47.0787	-0.960349	0.369532	-2.59882	0.00935439	0.0156402
C1orf167	0.278009	1.3162	4.0367	0.326058	0.74438
C1orf174	492.141	0.244668	0.122846	1.99167	0.0464072	0.0685756
C1orf185	0
C1orf198	1615.35	1.15665	0.0975289	11.8595	1.92046e-32	1.96155e-31
C1orf21	1842.9	-0.887486	0.0956225	-9.28114	1.67678e-20	1.05625e-19
C1orf210	38.2357	5.96018	0.89896	6.63009	3.35493e-11	1.25501e-10
C1orf216	704.04	-1.37367	0.119677	-11.4782	1.69807e-30	1.61267e-29
C1orf226	476.067	-0.548766	0.136018	-4.0345	5.47197e-05	0.000122046
C1orf35	457.875	0.498097	0.140633	3.54182	0.000397378	0.000801773
C1orf43	2654.52	0.204407	0.106143	1.92577	0.0541336	0.0787712
C1orf50	281.969	-0.311632	0.14782	-2.10819	0.0350144	0.0529364
C1orf52	824.007	-0.27837	0.111598	-2.49439	0.0126173	0.0206262
C1orf53	16.5058	1.72275	0.553366	3.11322	0.00185061	0.00342014
C1orf54	161.41	0.820008	0.217194	3.77547	0.000159709	0.000337992
C1orf56	123.467	0.4007	0.213624	1.87572	0.0606937	0.0875875
C1orf74	62.9686	1.12517	0.285311	3.94367	8.02437e-05	0.000175665
C1orf87	0.484516	0.403414	3.0358	0.132885	0.894284	0.915653
C1orf94	5.39014	-1.59385	0.909065	-1.75328	0.0795538	0.111985
C1QA	17.3144	7.28445	1.27046	5.73369	9.82674e-09	3.05338e-08
C1QB	10.0891	6.50468	1.33181	4.8841	1.03905e-06	2.73468e-06
C1QBP	1380.74	0.307934	0.11478	2.68281	0.00730058	0.0124033
C1QC	24.8887	7.80626	1.24429	6.27367	3.52633e-10	1.23182e-09
C1QL1	130.1	1.84363	0.224315	8.21893	2.05327e-16	1.06369e-15
C1QL2	78.954	-5.69943	0.499373	-11.4132	3.59419e-30	3.38309e-29
C1QL3	33.7036	-0.904596	0.444951	-2.03302	0.0420501	0.062621
C1QL4	65.5862	1.27886	0.44658	2.86366	0.00418774	0.00736364
C1QTNF1	81.0917	0.900923	0.287026	3.13882	0.00169631	0.00315038
C1QTNF2	33.2844	0.00511648	0.374437	0.0136645	0.989098	0.991467
C1QTNF3	162.77	-1.44505	0.218789	-6.60476	3.98157e-11	1.48265e-10
C1QTNF3-AMACR	2.86877	-0.333032	1.35906	-0.245047	0.80642	0.841878
C1QTNF4	273.813	0.272989	0.164391	1.66061	0.0967914	0.134007
C1QTNF4.1	273.813	0.272989	0.164391	1.66061	0.0967914	0.134007
C1QTNF5	0
C1QTNF6	628.644	0.983577	0.131491	7.48018	7.42186e-14	3.30622e-13
C1QTNF7	69.4811	6.4104	0.802963	7.98343	1.42316e-15	7.02872e-15
C1QTNF8	5.46534	-3.54084	1.23938	-2.85696	0.00427722	0.00750776
C1QTNF9	1.72523	-3.44708	1.8811	-1.83248	0.0668804	0.0955275
C1QTNF9B	6.41018	0.699145	0.870189	0.803441	0.42172	0.489879
C1R	60.4258	0.315812	0.282311	1.11867	0.263281	0.326936
C1R.1	60.4258	0.315812	0.282311	1.11867	0.263281	0.326936
C1RL	302.319	1.91766	0.218036	8.79517	1.42833e-18	8.1605e-18
C1RL.1	302.319	1.91766	0.218036	8.79517	1.42833e-18	8.1605e-18
C1S	217.633	1.30796	0.195927	6.67577	2.45933e-11	9.28477e-11
C2	33.2713	0.569539	0.401399	1.41888	0.155933	0.205441
C2.1	33.2713	0.569539	0.401399	1.41888	0.155933	0.205441
C2.2	33.2713	0.569539	0.401399	1.41888	0.155933	0.205441
C2.3	33.2713	0.569539	0.401399	1.41888	0.155933	0.205441
C2.4	33.2713	0.569539	0.401399	1.41888	0.155933	0.205441
C2.5	33.2713	0.569539	0.401399	1.41888	0.155933	0.205441
C2.6	33.2713	0.569539	0.401399	1.41888	0.155933	0.205441
C20orf141	0
C20orf144	7.25827	0.815643	0.782441	1.04243	0.29721	0.362809
C20orf173	4.65242	-2.5365	1.12709	-2.25047	0.0244189	0.0379178
C20orf202	9.24465	-1.9315	0.779877	-2.47667	0.0132613	0.0216024
C20orf203	95.356	-2.06037	0.255197	-8.07364	6.82317e-16	3.43295e-15
C20orf96	703.434	0.234713	0.147508	1.59119	0.111567	0.152181
C21orf140	0
C21orf58	534.276	-0.242266	0.137126	-1.76674	0.077272	0.109046
C21orf91	568.125	-0.0181004	0.129253	-0.140038	0.88863	0.911263
C22orf15	16.5617	2.69718	0.644396	4.1856	2.84413e-05	6.53797e-05
C22orf15.1	16.5617	2.69718	0.644396	4.1856	2.84413e-05	6.53797e-05
C22orf23	337.363	-0.632834	0.162436	-3.89589	9.78374e-05	0.000211938
C22orf31	2.64498	-1.13153	1.33635	-0.846729	0.397146	0.466513
C22orf39	830.011	-0.229857	0.117277	-1.95995	0.0500017	0.0734476
C22orf42	41.9545	-4.89498	0.560823	-8.7282	2.58747e-18	1.46206e-17
C2CD2	317.523	0.820841	0.179361	4.57646	4.72904e-06	1.16779e-05
C2CD2L	385.721	-0.958431	0.140281	-6.83221	8.3617e-12	3.2615e-11
C2CD3	962.219	-0.620872	0.115454	-5.37765	7.54635e-08	2.18698e-07
C2CD4A	2.16809	-0.356658	1.32226	-0.269734	0.787365	0.82582
C2CD4B	0.766376	2.79254	2.93707	0.95079	0.341711	0.408922
C2CD4C	390	-0.0688435	0.13309	-0.51727	0.604968	0.663971
C2CD4D	1.28475	0.140502	1.77464	0.0791723	0.936896	0.950254
C2CD5	2450.71	-0.606452	0.0826113	-7.34102	2.11964e-13	9.17663e-13
C2orf15	48.8398	-0.821826	0.302784	-2.71423	0.00664296	0.0113493
C2orf42	220.3	-0.665786	0.181962	-3.65894	0.000253265	0.000522948
C2orf49	782.512	-0.0229309	0.123715	-0.185353	0.852952	0.881508
C2orf50	11.409	-0.406934	0.623636	-0.652518	0.514067	0.579352
C2orf66	47.329	-3.07949	0.378895	-8.12756	4.38029e-16	2.22753e-15
C2orf68	1361.46	-0.267528	0.0929343	-2.87867	0.00399352	0.00704276
C2orf69	573.716	-0.830602	0.11203	-7.41408	1.2247e-13	5.37846e-13
C2orf72	1266.9	-2.05646	0.102832	-19.9982	5.7041e-89	2.41545e-87
C2orf73	3.13327	0.65396	1.18207	0.553234	0.580103	0.641012
C2orf74	202.259	0.0762661	0.173556	0.439432	0.660348	0.713343
C2orf76	114.448	0.00640301	0.209171	0.0306114	0.975579	0.980811
C2orf78	0.391847	1.8238	3.66562	0.497542	0.618807
C2orf78.1	0.391847	1.8238	3.66562	0.497542	0.618807
C2orf80	181.04	-4.62406	0.637581	-7.25251	4.09125e-13	1.73902e-12
C2orf81	136.82	0.0985973	0.196133	0.502707	0.61517	0.673514
C2orf88	62.1926	0.128167	0.282002	0.454489	0.649477	0.703753
C3	705.558	9.22211	1.25974	7.32067	2.46731e-13	1.06281e-12
C3AR1	5.56678	4.62545	1.44638	3.19795	0.00138406	0.00259739
C3orf18	416.167	-0.165183	0.139061	-1.18785	0.234892	0.295351
C3orf20	5.4418	-0.817062	0.917134	-0.890886	0.372991	0.441539
C3orf22	0.631626	-0.642106	3.18726	-0.20146	0.840339	0.870672
C3orf33	139.587	-0.736504	0.224212	-3.28485	0.00102036	0.00195107
C3orf38	668.247	0.00759851	0.134902	0.056326	0.955082	0.965273
C3orf49	5.50641	-0.735309	0.869223	-0.845938	0.397587	0.466939
C3orf52	96.3975	5.70282	0.535076	10.658	1.60061e-26	1.31897e-25
C3orf62	297.463	-1.06343	0.158359	-6.71531	1.8767e-11	7.15875e-11
C3orf70	171.677	-1.43156	0.177327	-8.07302	6.85808e-16	3.44858e-15
C3orf80	11.7267	1.26923	0.629973	2.01473	0.0439326	0.065171
C3orf84	0.134877	0.403169	4.08047	0.0988045	0.921294
C4A	22.5255	1.50171	0.480324	3.12646	0.00176924	0.00327447
C4A.1	22.5255	1.50171	0.480324	3.12646	0.00176924	0.00327447
C4A.2	22.5255	1.50171	0.480324	3.12646	0.00176924	0.00327447
C4A.3	22.5255	1.50171	0.480324	3.12646	0.00176924	0.00327447
C4B	18.8187	3.86606	0.741213	5.21585	1.82975e-07	5.11652e-07
C4B.1	18.8187	3.86606	0.741213	5.21585	1.82975e-07	5.11652e-07
C4B.2	18.8187	3.86606	0.741213	5.21585	1.82975e-07	5.11652e-07
C4B.3	18.8187	3.86606	0.741213	5.21585	1.82975e-07	5.11652e-07
C4B_2	0
C4BPA	0.852103	1.59448	2.49855	0.638161	0.523369	0.588141
C4BPB	5.11533	2.40927	1.11098	2.16861	0.0301125	0.0459774
C4orf17	0
C4orf19	52.6612	3.18091	0.388112	8.19585	2.48831e-16	1.28059e-15
C4orf3	1758.05	0.298254	0.099494	2.99771	0.00272018	0.00491862
C4orf33	302.38	-1.22023	0.149109	-8.18346	2.75807e-16	1.41739e-15
C4orf36	15.0954	0.0488713	0.538411	0.0907695	0.927676	0.942869
C4orf46	668.834	0.453252	0.140226	3.23231	0.00122794	0.00232476
C4orf50	19.6119	-5.56021	0.947784	-5.86654	4.44981e-09	1.42421e-08
C4orf51	0.648816	2.55171	3.03892	0.839677	0.40109	0.469949
C5	274.682	0.53786	0.171921	3.12854	0.00175679	0.00325479
C5AR1	7.72132	1.90782	0.929648	2.05219	0.0401509	0.0600612
C5AR2	0.278009	1.3162	4.0367	0.326058	0.74438
C5orf15	1296.25	0.483225	0.114654	4.21464	2.50178e-05	5.78647e-05
C5orf22	749.777	-0.0586061	0.105121	-0.557511	0.577178	0.638497
C5orf24	1980.45	-0.265864	0.122026	-2.17874	0.0293509	0.044944
C5orf34	188.69	0.0546868	0.175098	0.312322	0.754796	0.798452
C5orf46	0.528665	-1.4639	3.38364	-0.432641	0.665275	0.717717
C5orf47	2.3643	-1.17662	1.47939	-0.795342	0.426415	0.494407
C5orf52	0
C5orf58	0.860357	1.6106	2.25803	0.713276	0.475675	0.542367
[truncated: 18,493 more rows]

## Sheet: GO_compareCluster_KO
...1	Cluster	ID	Description	GeneRatio	BgRatio	RichFactor	FoldEnrichment	zScore	pvalue	p.adjust	qvalue	geneID	Count
1	Up	GO:0030198	extracellular matrix organization	135/2245	332/18888	0.406627	3.4211	16.346	2.71045e-41	8.81439e-38	5.3368e-38	ABI3BP/ADAMTS1/ADAMTS12/ADAMTS14/ADAMTS15/ADAMTS17/ADAMTS18/ADAMTS19/ADAMTS2/ADAMTS20/ADAMTS4/ADAMTS8/ADAMTS9/ADAMTSL3/ADAMTSL4/ADAMTSL5/ADTRP/AEBP1/AGT/ANXA2/B4GALT1/BMP1/BMP2/CAV1/CAV2/CCDC80/COL10A1/COL12A1/COL13A1/COL14A1/COL15A1/COL17A1/COL18A1/COL1A1/COL1A2/COL22A1/COL23A1/COL24A1/COL27A1/COL2A1/COL3A1/COL4A1/COL5A1/COL5A2/COL5A3/COL6A1/COL8A2/COMP/CREB3L1/CRISPLD2/CST3/CTSV/CYP1B1/DDR2/DPP…	135
2	Up	GO:0043062	extracellular structure organization	135/2245	333/18888	0.405405	3.41082	16.3016	4.04486e-41	8.81439e-38	5.3368e-38	ABI3BP/ADAMTS1/ADAMTS12/ADAMTS14/ADAMTS15/ADAMTS17/ADAMTS18/ADAMTS19/ADAMTS2/ADAMTS20/ADAMTS4/ADAMTS8/ADAMTS9/ADAMTSL3/ADAMTSL4/ADAMTSL5/ADTRP/AEBP1/AGT/ANXA2/B4GALT1/BMP1/BMP2/CAV1/CAV2/CCDC80/COL10A1/COL12A1/COL13A1/COL14A1/COL15A1/COL17A1/COL18A1/COL1A1/COL1A2/COL22A1/COL23A1/COL24A1/COL27A1/COL2A1/COL3A1/COL4A1/COL5A1/COL5A2/COL5A3/COL6A1/COL8A2/COMP/CREB3L1/CRISPLD2/CST3/CTSV/CYP1B1/DDR2/DPP…	135
3	Up	GO:0045229	external encapsulating structure organization	135/2245	334/18888	0.404192	3.40061	16.2574	6.02389e-41	8.81439e-38	5.3368e-38	ABI3BP/ADAMTS1/ADAMTS12/ADAMTS14/ADAMTS15/ADAMTS17/ADAMTS18/ADAMTS19/ADAMTS2/ADAMTS20/ADAMTS4/ADAMTS8/ADAMTS9/ADAMTSL3/ADAMTSL4/ADAMTSL5/ADTRP/AEBP1/AGT/ANXA2/B4GALT1/BMP1/BMP2/CAV1/CAV2/CCDC80/COL10A1/COL12A1/COL13A1/COL14A1/COL15A1/COL17A1/COL18A1/COL1A1/COL1A2/COL22A1/COL23A1/COL24A1/COL27A1/COL2A1/COL3A1/COL4A1/COL5A1/COL5A2/COL5A3/COL6A1/COL8A2/COMP/CREB3L1/CRISPLD2/CST3/CTSV/CYP1B1/DDR2/DPP…	135
4	Up	GO:0042060	wound healing	157/2245	430/18888	0.365116	3.07186	15.9616	6.10838e-41	8.81439e-38	5.3368e-38	ACVRL1/ADAMTS18/ADRA2B/ADTRP/AHNAK/AJUBA/ALOX15/ALOX5/ANXA1/ANXA2/ANXA8/APOE/APOH/AQP1/ARHGEF19/B4GALT1/C4BPB/CAV1/CD34/CD36/CD40/CD44/CD9/CEACAM1/CHMP4C/CLDN1/CLDN19/CLDN3/CLDN4/CLEC7A/COL3A1/COL5A1/COMP/DDR2/DSP/DUOX2/ELK3/EMILIN1/EMILIN2/EPPK1/ERBB3/EREG/F10/F11/F11R/F13A1/F2/F2RL1/F5/F7/FCER1G/FERMT1/FGA/FGB/FGF10/FGG/FGL1/FIGNL2/FKBP10/FN1/FOXA2/FOXC2/FZD6/GATA2/GATA4/GP9/GRHL3/HMOX1/HNF4A/H…	157
5	Up	GO:0048568	embryonic organ development	161/2245	455/18888	0.353846	2.97704	15.6782	5.51627e-40	6.36798e-37	3.85558e-37	A2M/ADM/ALDH1A2/ALDH1A3/ALX1/ALX4/APELA/APLNR/ASB2/ASCL2/ATOH1/BMP4/BMP5/CDKN1C/CDX2/CDX4/CEBPA/CEBPB/CLRN1/COL18A1/COL27A1/COL2A1/CTHRC1/ECE1/EDNRA/EFEMP1/EN2/EPAS1/EYA1/FBN1/FBN2/FGF10/FGF8/FOLR1/FOXC1/FOXC2/FOXF1/FOXF2/FOXH1/FRZB/FZD6/GATA2/GATA3/GATA4/GBX2/GDF3/GDNF/GJA1/GJB6/GLI1/GRHL2/GRHL3/GSC/HAND1/HAND2/HEY2/HLX/HNF1B/HOXA1/HOXA11/HOXA2/HOXA3/HOXA4/HOXA5/HOXA7/HOXA9/HOXB1/HOXB2/HOXB3/HOX…	161
6	Up	GO:0007389	pattern specification process	154/2245	474/18888	0.324895	2.73346	14.0379	2.58892e-33	2.49054e-30	1.50793e-30	ACVRL1/ALDH1A2/ALX4/APLNR/ASB2/BMP1/BMP2/BMP4/BMP5/C1QA/C3/CDX1/CDX2/CDX4/CER1/CFC1/CYP26C1/DAAM2/DBX1/DKK1/DMRT2/DNAI2/EGR2/ETS2/EYA1/FGF10/FGF8/FOLR1/FOXA1/FOXA2/FOXB1/FOXC1/FOXC2/FOXD1/FOXF1/FOXH1/FST/GATA4/GATA5/GBX2/GDF3/GDNF/GJA1/GLI1/GPC3/GREM1/GRHL3/GSC/HAND1/HAND2/HES2/HES3/HEY2/HEYL/HHEX/HHIP/HNF1B/HOXA10/HOXA11/HOXA2/HOXA3/HOXA4/HOXA5/HOXA6/HOXA7/HOXA9/HOXB1/HOXB2/HOXB3/HOXB4/HOXB5/HOX…	154
7	Up	GO:0048562	embryonic organ morphogenesis	115/2245	297/18888	0.387205	3.2577	14.4035	6.18481e-33	5.09982e-30	3.08775e-30	ALDH1A3/ALX1/ALX4/APLNR/ASB2/ATOH1/BMP4/CLRN1/COL2A1/CTHRC1/EDNRA/EFEMP1/EYA1/FBN1/FBN2/FGF10/FGF8/FOLR1/FOXC2/FOXF1/FOXF2/FOXH1/FRZB/FZD6/GATA2/GATA3/GATA4/GBX2/GJA1/GJB6/GLI1/GRHL2/GRHL3/GSC/HAND1/HAND2/HLX/HNF1B/HOXA1/HOXA11/HOXA2/HOXA3/HOXA4/HOXA5/HOXA7/HOXA9/HOXB1/HOXB2/HOXB3/HOXB4/HOXB5/HOXB6/HOXB7/HOXB8/HOXB9/HOXC11/HOXC4/HOXC9/HOXD10/HOXD3/HOXD4/HOXD9/HPN/ID2/IHH/IRX5/ITGA8/KCNQ1/LBX1/LRI…	115
8	Up	GO:0003002	regionalization	143/2245	429/18888	0.333333	2.80445	13.8849	2.4641e-32	1.77785e-29	1.07642e-29	ACVRL1/ALDH1A2/ALX4/APLNR/ASB2/BMP1/BMP2/BMP4/C1QA/C3/CDX1/CDX2/CDX4/CER1/CFC1/CYP26C1/DAAM2/DBX1/DKK1/DMRT2/DNAI2/EGR2/ETS2/FGF10/FGF8/FOLR1/FOXA1/FOXA2/FOXB1/FOXC1/FOXC2/FOXD1/FOXF1/FOXH1/GATA4/GATA5/GBX2/GDF3/GDNF/GJA1/GLI1/GPC3/GREM1/GSC/HAND1/HAND2/HES2/HES3/HEY2/HEYL/HHEX/HHIP/HNF1B/HOXA10/HOXA11/HOXA2/HOXA3/HOXA4/HOXA5/HOXA6/HOXA7/HOXA9/HOXB1/HOXB2/HOXB3/HOXB4/HOXB5/HOXB6/HOXB7/HOXB8/HOXB9…	143
9	Up	GO:0048705	skeletal system morphogenesis	96/2245	229/18888	0.419214	3.527	14.1303	6.55235e-31	4.20224e-28	2.54431e-28	ACP5/ACTN3/ALX1/ALX4/BARX2/BMP1/BMP4/CDX1/CER1/CHAD/COL13A1/COL1A1/COL27A1/COL2A1/COL3A1/COMP/CSRNP1/EYA1/FBN2/FGF18/FGF4/FGF8/FMN1/FOSL2/FOXC1/FOXC2/FREM1/GHR/GREM1/GRHL2/GSC/HAS2/HHIP/HOXA1/HOXA11/HOXA2/HOXA3/HOXA4/HOXA5/HOXA7/HOXA9/HOXB1/HOXB2/HOXB3/HOXB4/HOXB5/HOXB6/HOXB7/HOXB8/HOXB9/HOXC11/HOXC4/HOXC8/HOXC9/HOXD10/HOXD3/HOXD4/HOXD8/HOXD9/IHH/IRX5/LAMA5/MDFI/MGP/MMP14/MMP2/MSX1/MSX2/NEUROG1/N…	96
10	Up	GO:0050878	regulation of body fluid levels	127/2245	370/18888	0.343243	2.88783	13.4692	3.28839e-30	1.89806e-27	1.14921e-27	ADAMTS18/ADM/ADRA2B/ADTRP/AGR2/ANO1/ANXA2/ANXA8/APLNR/APOE/APOH/AQP1/AQP3/ATP7B/AVP/C4BPB/CAV1/CCND1/CD36/CD40/CD9/CEACAM1/CFTR/COL3A1/COMP/CYBA/CYP4F12/EDNRB/EMILIN1/EMILIN2/F10/F11/F11R/F13A1/F2/F2RL1/F5/F7/FCER1G/FGA/FGB/FGF10/FGG/FGL1/FLI1/FOSL2/FOXA2/FOXB1/FZD6/GJA1/GJA5/GP9/HAS2/HK2/HNF4A/HPSE/HRG/HSD11B2/IL6ST/KNG1/LCK/LMAN1/LYN/MUC2/MYL12A/MYL9/NEUROG1/NFE2/NOS3/NPPB/NPR3/OAS2/OPRK1/P2RX1…	127
11	Up	GO:0048706	embryonic skeletal system development	68/2245	128/18888	0.53125	4.4696	14.4658	6.6781e-30	3.50418e-27	2.12165e-27	ALX1/ALX4/BMP4/COL1A1/COL2A1/DMRT2/EDNRA/EYA1/FGF8/FOXC2/GRHL2/GSC/HAND2/HOXA1/HOXA11/HOXA2/HOXA3/HOXA4/HOXA5/HOXA6/HOXA7/HOXA9/HOXB1/HOXB2/HOXB3/HOXB4/HOXB5/HOXB6/HOXB7/HOXB8/HOXB9/HOXC11/HOXC4/HOXC5/HOXC6/HOXC9/HOXD1/HOXD10/HOXD3/HOXD4/HOXD9/IHH/IRX5/KIAA1217/MDFI/MMP14/NKX3-2/OSR1/OSR2/PCSK5/PDGFRA/PRRX1/RBP4/RUNX2/SHH/SHOX2/SIX1/SIX2/SIX4/SULF1/SULF2/TBX15/TFAP2A/TGFBR2/TWIST1/WNT11/WNT5A/WNT…	68
12	Up	GO:0072001	renal system development	117/2245	329/18888	0.355623	2.99199	13.3869	1.68568e-29	8.10813e-27	4.90918e-27	ACE/ACTA2/ADAMTS1/AGT/AGTR1/AGTR2/ALDH1A2/ANGPT1/ANGPT2/AQP1/BMP10/BMP2/BMP4/CALB1/CD34/CDKN1C/CER1/COL4A1/CTSH/CYP26A1/DACT2/EDNRA/EDNRB/ENPEP/EPCAM/EYA1/FBN1/FGF10/FGF8/FMN1/FOXC1/FOXC2/FOXD1/FOXF1/FRAS1/FREM2/GATA3/GCNT1/GDF6/GDNF/GPC3/GREM1/HAS2/HEYL/HMGCS2/HNF1B/HOXA11/HOXB7/HOXC11/HOXD11/HS3ST3A1/ID3/IL6R/IRX1/IRX2/IRX3/ITGA8/JAG1/KANK2/KIF26B/LAMA5/LGR4/LGR5/LIN28A/LRRK2/MME/MYOCD/NID1/NKX…	117
13	Up	GO:0048732	gland development	141/2245	449/18888	0.314031	2.64206	12.9335	7.71099e-29	3.42368e-26	2.07291e-26	ALDH1A2/ALDH1A3/ALOX15B/APOA1/AREG/ATP7B/BMP2/BMP4/CAV1/CCND1/CDH1/CDKN1C/CEACAM1/CEBPA/CEBPB/CGA/CLDN1/CPS1/CRIP1/CSF1R/CYP19A1/CYP1A1/CYP1B1/EDAR/EDNRA/ELF3/EPHB3/ESRP2/FA2H/FGF10/FGF8/FGL1/FOXA1/FOXB1/FOXC1/FOXF1/FOXH1/FOXI3/FRZB/GATA2/GATA3/GATA6/GDF7/GJA1/GLI1/HAND2/HGF/HK2/HLX/HMGCS2/HNF1A/HNF1B/HOXA10/HOXA11/HOXA13/HOXA3/HOXA5/HOXA9/HOXB3/HOXB9/HOXD13/HOXD3/HOXD9/HPN/ID2/IGF2/IGFBP5/IHH/IR…	141
14	Up	GO:0009952	anterior/posterior pattern specification	90/2245	219/18888	0.410959	3.45755	13.435	2.814e-28	1.16017e-25	7.02442e-26	ALDH1A2/ALX4/BMP2/BMP4/CDX1/CDX2/CDX4/CER1/CFC1/CYP26C1/DKK1/DMRT2/ETS2/FGF8/FOXA2/FOXB1/FOXC1/FOXC2/FOXF1/FOXH1/GATA4/GBX2/GDF3/GPC3/HES2/HES3/HEY2/HEYL/HHEX/HNF1B/HOXA10/HOXA11/HOXA2/HOXA3/HOXA4/HOXA5/HOXA6/HOXA7/HOXA9/HOXB1/HOXB2/HOXB3/HOXB4/HOXB5/HOXB6/HOXB7/HOXB8/HOXB9/HOXC10/HOXC11/HOXC4/HOXC5/HOXC6/HOXC8/HOXC9/HOXD10/HOXD13/HOXD3/HOXD4/HOXD8/HOXD9/LEF1/LEFTY2/MEOX1/MEOX2/MSX1/MSX2/NEUROG1/…	90
15	Up	GO:0001822	kidney development	111/2245	319/18888	0.347962	2.92753	12.752	4.13872e-27	1.59258e-24	9.64249e-25	ACE/ACTA2/ADAMTS1/AGT/AGTR1/AGTR2/ALDH1A2/ANGPT1/ANGPT2/AQP1/BMP10/BMP2/BMP4/CALB1/CD34/CDKN1C/CER1/CTSH/CYP26A1/DACT2/EDNRA/EDNRB/ENPEP/EPCAM/EYA1/FBN1/FGF10/FGF8/FMN1/FOXC1/FOXC2/FOXD1/FRAS1/FREM2/GATA3/GCNT1/GDF6/GDNF/GPC3/GREM1/HAS2/HEYL/HMGCS2/HNF1B/HOXA11/HOXB7/HOXC11/HOXD11/HS3ST3A1/ID3/IL6R/IRX1/IRX2/IRX3/ITGA8/JAG1/KANK2/KIF26B/LAMA5/LGR4/LIN28A/LRRK2/MME/NID1/NKX3-1/NPHS1/NPNT/NRP1/OSR1…	111
16	Up	GO:0007599	hemostasis	90/2245	233/18888	0.386266	3.2498	12.691	6.23588e-26	2.24959e-23	1.36205e-23	ADAMTS18/ADRA2B/ADTRP/ANXA2/ANXA8/APOE/APOH/C4BPB/CAV1/CD36/CD40/CD9/CEACAM1/COL3A1/COMP/EMILIN1/EMILIN2/F10/F11/F11R/F13A1/F2/F2RL1/F5/F7/FCER1G/FGA/FGB/FGG/FGL1/FLI1/FOXA2/FZD6/GP9/HNF4A/HPSE/HRG/IL6ST/KNG1/LCK/LMAN1/LYN/MYL12A/MYL9/NFE2/NOS3/P2RX1/P2RY12/PAPSS2/PDGFRA/PEAR1/PF4/PLA2G4A/PLAT/PLAU/PLCG2/PLEK/PLG/PLSCR1/PRKG1/PROC/PROCR/PROZ/PRSS56/PTPN6/SELP/SERPINA1/SERPINA10/SERPINC1/SERPIND1/…	90
17	Up	GO:0007596	blood coagulation	88/2245	226/18888	0.389381	3.276	12.6422	1.12727e-25	3.82741e-23	2.31736e-23	ADAMTS18/ADRA2B/ADTRP/ANXA2/ANXA8/APOE/APOH/C4BPB/CAV1/CD36/CD40/CD9/CEACAM1/COL3A1/COMP/EMILIN1/EMILIN2/F10/F11/F11R/F13A1/F2/F2RL1/F5/F7/FCER1G/FGA/FGB/FGG/FGL1/FOXA2/FZD6/GP9/HNF4A/HPSE/HRG/IL6ST/KNG1/LCK/LMAN1/LYN/MYL12A/MYL9/NOS3/P2RX1/P2RY12/PAPSS2/PDGFRA/PEAR1/PF4/PLA2G4A/PLAT/PLAU/PLCG2/PLEK/PLG/PLSCR1/PRKG1/PROC/PROCR/PROZ/PRSS56/PTPN6/SELP/SERPINA1/SERPINA10/SERPINC1/SERPIND1/SERPINE1/S…	88
18	Up	GO:0045785	positive regulation of cell adhesion	142/2245	485/18888	0.292784	2.46329	11.9904	1.32067e-25	4.23495e-23	2.56411e-23	ABI3BP/AGR2/AIF1/ALOX15/ALOX5/ANGPT1/ANXA1/APBB1IP/APOA1/CARD11/CAV1/CCDC80/CCL5/CD28/CD36/CD4/CD44/CD55/CD70/CD74/CD86/CEACAM6/CHST4/CXCL12/DAB2/DOCK8/DPP4/EBI3/ECM2/EGFL6/EGFLAM/EMILIN1/EMILIN2/EPHA1/EPO/ETS1/F11R/FBLN2/FERMT1/FGA/FGB/FGG/FMN1/FN1/FOXA1/FOXA2/FOXC2/FOXF1/GATA3/GCNT1/HAS2/HHLA2/HLA-DMB/HLA-DOA/HLA-DPA1/HLA-DQB1/HLA-DQB2/HLA-DRB1/HLA-E/HLA-G/HLX/HRG/ICOSLG/IGF1/IGF2/IHH/IL18/IL1A…	142
19	Up	GO:0001763	morphogenesis of a branching structure	83/2245	206/18888	0.402913	3.38985	12.6668	1.78707e-25	5.42894e-23	3.28703e-23	ADM/AGT/AGTR2/AREG/BMP2/BMP4/COL13A1/COL4A1/CTSH/CTSZ/EDNRA/ESRP2/EYA1/FGF10/FGF8/FIGNL2/FOXA1/FOXC2/FOXD1/FOXF1/GBX2/GDF7/GDNF/GPC3/GREM1/GRHL2/HGF/HHIP/HNF1B/HOXA11/HOXA13/HOXA5/HOXB7/HOXD11/HOXD13/HS3ST3A1/IHH/KDR/LAMA5/LEF1/LGR4/LRRK2/MDK/MET/MMP14/MSX2/NKX3-1/NPNT/NRP1/PAX2/PAX8/PGR/PKHD1/PRDM1/RSPO2/RSPO3/SHH/SHOX2/SIX1/SIX2/SIX4/SLIT2/SNAI2/SOX10/SPINT1/ST14/SULF1/TACSTD2/TBX2/TBX20/TBX3/T…	83
20	Up	GO:0061448	connective tissue development	101/2245	288/18888	0.350694	2.95052	12.2508	4.5034e-25	1.2446e-22	7.53558e-23	ACTA2/ACVRL1/ADAMTS12/BARX2/BGN/BMP1/BMP10/BMP2/BMP4/BMP5/CD34/CD44/CER1/CHI3L1/COL1A1/COL27A1/COL2A1/COL3A1/COL5A1/COL6A1/COMP/CREB3L2/CRIP1/CYTL1/DGAT2/EBF2/EFEMP1/FGF18/FGF4/FOSL2/FOXA1/FOXC2/FOXD1/FRZB/GATA3/GDF6/GDF7/GHR/GREM1/HAND1/HAND2/HMGA2/HMGCS2/HOXA11/HOXA3/HOXA5/HOXB3/HOXC4/HOXD3/IHH/IL6R/LOXL2/MAF/MATN3/MDK/MGP/MSX1/MSX2/NFATC2/NKX3-2/NR1H4/OGN/OSR1/OSR2/PITX1/PKDCC/POU4F2/PPARG/PRK…	101
21	Up	GO:0060562	epithelial tube morphogenesis	111/2245	335/18888	0.331343	2.78771	12.1251	4.52816e-25	1.2446e-22	7.53558e-23	ACVRL1/ADAMTS12/ADM/AGT/AGTR2/APLNR/AREG/ASB2/BMP2/BMP4/BMP5/COL4A1/CSF1R/CTHRC1/CTSH/CTSZ/DLC1/EDNRA/ESRP2/EYA1/FGF10/FGF8/FMN1/FOLR1/FOXA1/FOXC2/FOXD1/FOXF1/FOXH1/FZD6/GATA3/GATA4/GBX2/GDF7/GDNF/GJA1/GPC3/GREM1/GRHL2/GRHL3/HAND1/HAND2/HHIP/HNF1B/HOXA11/HOXA5/HOXB7/HOXD11/HS3ST3A1/IHH/IRX1/IRX2/IRX3/ITGAX/KDR/KIF26B/LAMA5/LBX1/LEF1/LGR4/LGR5/MDK/MET/MMP14/MSX2/NKX3-1/NPNT/NRP1/OSR1/OVOL2/PAX2/PA…	111
22	Up	GO:0050817	coagulation	88/2245	231/18888	0.380952	3.20509	12.3847	6.95736e-25	1.82536e-22	1.10519e-22	ADAMTS18/ADRA2B/ADTRP/ANXA2/ANXA8/APOE/APOH/C4BPB/CAV1/CD36/CD40/CD9/CEACAM1/COL3A1/COMP/EMILIN1/EMILIN2/F10/F11/F11R/F13A1/F2/F2RL1/F5/F7/FCER1G/FGA/FGB/FGG/FGL1/FOXA2/FZD6/GP9/HNF4A/HPSE/HRG/IL6ST/KNG1/LCK/LMAN1/LYN/MYL12A/MYL9/NOS3/P2RX1/P2RY12/PAPSS2/PDGFRA/PEAR1/PF4/PLA2G4A/PLAT/PLAU/PLCG2/PLEK/PLG/PLSCR1/PRKG1/PROC/PROCR/PROZ/PRSS56/PTPN6/SELP/SERPINA1/SERPINA10/SERPINC1/SERPIND1/SERPINE1/S…	88
23	Up	GO:0061138	morphogenesis of a branching epithelium	78/2245	189/18888	0.412698	3.47218	12.5452	8.12285e-25	2.03848e-22	1.23423e-22	ADM/AGT/AGTR2/AREG/BMP2/BMP4/COL4A1/CTSH/CTSZ/EDNRA/ESRP2/EYA1/FGF10/FGF8/FOXA1/FOXC2/FOXD1/FOXF1/GBX2/GDF7/GDNF/GPC3/GREM1/GRHL2/HGF/HHIP/HNF1B/HOXA11/HOXA13/HOXA5/HOXB7/HOXD11/HOXD13/HS3ST3A1/IHH/KDR/LAMA5/LEF1/LGR4/MDK/MET/MMP14/MSX2/NKX3-1/NPNT/NRP1/PAX2/PAX8/PGR/PKHD1/RSPO2/RSPO3/SHH/SIX1/SIX2/SIX4/SLIT2/SNAI2/SOX10/SPINT1/ST14/SULF1/TACSTD2/TBX2/TBX20/TBX3/TCF21/TGFBR2/TGM2/TIE1/TP63/VDR/WN…	78
24	Up	GO:0050673	epithelial cell proliferation	139/2245	482/18888	0.288382	2.42626	11.6497	2.20471e-24	5.30233e-22	3.21037e-22	ACVRL1/AGTR1/ALDH1A2/ALOX5/APELA/APLNR/APOA1/APOE/APOH/AREG/B4GALT1/BMP4/BMP5/CAV1/CAV2/CCL5/CCND1/CD34/CDH3/CDKN1C/CEACAM1/CEBPB/CLDN1/CLDN18/COL8A2/CXCL12/DAB2/DBH/EDNRB/EGFL7/EPPK1/EREG/ESRP2/EYA1/FA2H/FERMT1/FGF10/FGFBP1/FGL1/FLT1/FST/GATA2/GATA3/GLI1/GPBAR1/GPC3/GRN/HAS2/HGF/HLX/HMOX1/HNF1B/HOXA5/HPN/HSPG2/ID2/IGF1/IGF2/IGFBP3/IGFBP4/IGFBP5/IHH/IRF6/ITGA4/JAG1/KDR/KLK8/LAMA5/LAMB1/LAMC1/LGR4…	139
25	Up	GO:0051216	cartilage development	82/2245	209/18888	0.392344	3.30094	12.285	2.87208e-24	6.63106e-22	4.01487e-22	ACVRL1/ADAMTS12/BARX2/BGN/BMP1/BMP10/BMP2/BMP4/BMP5/CD44/CER1/CHI3L1/COL1A1/COL27A1/COL2A1/COL3A1/COL6A1/COMP/CREB3L2/CYTL1/EFEMP1/FGF18/FGF4/FOSL2/FRZB/GATA3/GDF6/GHR/GREM1/HAND1/HAND2/HMGA2/HOXA11/HOXA3/HOXA5/HOXB3/HOXC4/HOXD3/IHH/LOXL2/MAF/MATN3/MDK/MGP/MSX1/MSX2/NFATC2/NKX3-2/OGN/OSR1/OSR2/PITX1/PKDCC/PRKG2/PRRX1/PTH1R/PTHLH/RARG/RSPO2/RUNX1/RUNX2/RUNX3/SCIN/SERPINH1/SHOX2/SIX2/SLC39A14/SNAI1…	82
26	Up	GO:0031589	cell-substrate adhesion	112/2245	359/18888	0.311978	2.62478	11.4154	7.39474e-23	1.64163e-20	9.93949e-21	ABI3BP/ACTN3/ACVRL1/ADAMTS12/ADAMTS9/AGR2/AJUBA/ALOX15/ANGPT1/ANGPT2/ANGPTL3/ANXA2/APOA1/ARHGAP6/BCAM/CCDC80/CD34/CD36/CD44/CDH11/CEACAM6/COL13A1/COL17A1/COL1A1/COL3A1/COL5A3/DAB2/DLC1/ECM2/EGFL6/EGFLAM/EMILIN1/EPHA1/EPHB3/FBLN2/FERMT1/FGA/FGB/FGG/FGL1/FMN1/FN1/FOXF1/FREM1/FZD4/GREM1/HAS2/HOXA7/HOXD3/HPSE/HRG/ITGA1/ITGA11/ITGA4/ITGA5/ITGA8/ITGA9/ITGAL/ITGAM/ITGAX/ITGB2/ITGB4/ITGB5/ITGB6/ITGB7/JAG…	112
27	Up	GO:0060485	mesenchyme development	107/2245	336/18888	0.318452	2.67926	11.4068	1.14414e-22	2.44592e-20	1.48092e-20	ACTA2/ACTC1/ACTG2/ACVRL1/AGT/ALDH1A2/ALX1/APLNR/BAMBI/BMP2/BMP4/BMP5/BNC2/COL1A1/CYP26C1/DAB2/DKK1/DPPA4/EDN3/EDNRA/EDNRB/ERBB3/FGF10/FGF8/FN1/FOLR1/FOXA1/FOXA2/FOXC1/FOXC2/FOXD1/FOXF1/FOXF2/FOXH1/FRZB/GATA3/GATA4/GATA5/GBX2/GDNF/GREM1/GSC/HAND1/HAND2/HAS2/HEY2/HEYL/HGF/HMGA2/HOXA5/HPN/IGF1/IL1B/JAG1/LAMA5/LEF1/LOXL2/LRG1/MDK/MEOX1/MSX1/MSX2/NOS3/NRP1/NRTN/OSR1/OVOL2/PAX2/PHLDB2/PHOX2B/PITX2/PTK7…	107
28	Up	GO:0061041	regulation of wound healing	62/2245	138/18888	0.449275	3.77992	12.0377	2.45999e-22	5.07108e-20	3.07036e-20	ADAMTS18/ADTRP/ALOX5/ANXA1/ANXA2/APOE/APOH/CAV1/CD36/CD9/CEACAM1/CLDN1/CLDN19/CLDN3/CLDN4/CLEC7A/DDR2/DUOX2/EMILIN1/EMILIN2/EPPK1/F11/F2/F2RL1/F7/FERMT1/FGA/FGB/FGG/FIGNL2/FOXA2/FOXC2/HPSE/HRG/KNG1/MYLK/MYOZ1/NOS3/OCLN/PDGFRA/PHLDB2/PLAT/PLAU/PLG/PRKG1/PROC/RREB1/SERPINC1/SERPINE1/SERPINF2/SERPING1/SMOC2/TFPI/THBD/THBS1/TNFAIP3/TNFRSF12A/TSPAN8/VIL1/VTN/WFDC1/XBP1	62
29	Up	GO:0022407	regulation of cell-cell adhesion	136/2245	496/18888	0.274194	2.30689	10.8328	1.17117e-21	2.33103e-19	1.41136e-19	ADAMTS18/ADTRP/AIF1/ALOX5/ANXA1/APOA1/ARG1/ASCL2/B4GALNT2/BMP2/BMP4/CARD11/CAV1/CCL5/CD28/CD300A/CD4/CD44/CD55/CD70/CD74/CD86/CD9/CDH1/CEACAM1/CEACAM6/CEBPB/CHST4/CXCL12/DOCK8/DPP4/EBI3/EMILIN1/EMILIN2/EPCAM/EPHB3/EPO/ETS1/F11R/FGA/FGB/FGG/FGL1/FGL2/FOXA1/FOXA2/FXYD5/GATA3/GCNT1/GPNMB/HAS2/HFE/HHLA2/HLA-DMB/HLA-DOA/HLA-DPA1/HLA-DQB1/HLA-DQB2/HLA-DRB1/HLA-E/HLA-G/HLX/ICOSLG/IDO1/IGF1/IGF2/IHH/IL18…	136
30	Up	GO:0060537	muscle tissue development	125/2245	438/18888	0.285388	2.40107	10.8962	1.33484e-21	2.56823e-19	1.55497e-19	ACTC1/ACTN3/ADAMTS9/ALDH1A2/ALPK2/ALPK3/ANKRD1/ANKRD33/ASB2/ATF3/B4GALNT2/BARX2/BMP10/BMP2/BMP4/BMP5/CAV1/CAV2/CHRNA1/CHRND/COL14A1/COL3A1/COL6A1/DKK1/DSG2/DSP/EDNRA/EGR2/ERBB3/EYA1/EYA2/FES/FGF20/FGF8/FHL2/FLNB/FOSL2/FOXC1/FOXC2/FOXH1/GATA4/GATA5/GATA6/GJA1/GJA5/GJB6/GLI1/GREM1/HAND1/HEY2/HEYL/HLX/HOXD10/HOXD9/ID2/IGF1/IGF2/IGFBP5/IHH/IRX3/ITGA8/JPH2/KLF5/KLHL40/LEF1/LMOD3/MEOX2/MSC/MSX1/MSX2/MY…	125
31	Up	GO:0048704	embryonic skeletal system morphogenesis	49/2245	94/18888	0.521277	4.38569	12.0858	1.89842e-21	3.53473e-19	2.14015e-19	ALX1/ALX4/BMP4/COL2A1/EYA1/FGF8/FOXC2/GRHL2/GSC/HOXA1/HOXA11/HOXA2/HOXA3/HOXA4/HOXA5/HOXA7/HOXA9/HOXB1/HOXB2/HOXB3/HOXB4/HOXB5/HOXB6/HOXB7/HOXB8/HOXB9/HOXC11/HOXC4/HOXC9/HOXD10/HOXD3/HOXD4/HOXD9/IRX5/MDFI/MMP14/OSR1/OSR2/PDGFRA/PRRX1/RUNX2/SHOX2/SIX1/SIX2/SIX4/TBX15/TFAP2A/TGFBR2/TWIST1	49
32	Up	GO:0048754	branching morphogenesis of an epithelial tube	65/2245	157/18888	0.414013	3.48324	11.4752	5.4141e-21	9.76568e-19	5.91276e-19	AGT/AGTR2/AREG/BMP2/BMP4/COL4A1/CTSH/CTSZ/EDNRA/ESRP2/EYA1/FGF10/FGF8/FOXA1/FOXC2/FOXD1/FOXF1/GBX2/GDF7/GDNF/GPC3/GREM1/HHIP/HNF1B/HOXA11/HOXA5/HOXB7/HOXD11/HS3ST3A1/IHH/KDR/LAMA5/LEF1/LGR4/MDK/MET/MMP14/MSX2/NKX3-1/NPNT/NRP1/PAX2/PAX8/PGR/PKHD1/RSPO2/SHH/SIX1/SIX2/SIX4/SLIT2/TACSTD2/TBX2/TBX20/TBX3/TCF21/TGFBR2/TIE1/VDR/WNT1/WNT2/WNT5A/WNT6/WT1/YAP1	65
33	Up	GO:0045165	cell fate commitment	94/2245	289/18888	0.32526	2.73653	10.926	8.87846e-21	1.55292e-18	9.40239e-19	ATOH1/BARHL2/BMP2/BMP4/DBX1/DHH/DKK1/EBF2/EDNRA/EPAS1/ESRP1/ETS2/EYA1/EYA2/FGF10/FGF8/FOXA1/FOXA2/FOXC2/FOXI3/GATA2/GATA3/GATA4/GATA5/GATA6/GDF3/GDF7/GSC/HEY2/HNF1B/HOXA11/HOXA13/HOXA2/HOXC10/HOXD10/ID2/IHH/IL6R/ISL2/JAG1/KDR/KLF4/LBX1/LHX3/MITF/MNX1/NANOG/NEUROD4/NEUROG1/NR2F2/NRP1/OLIG3/ONECUT1/PAX2/PITX1/POU4F1/POU5F1/PPARG/PRDM1/PRDM14/PRRX1/RUNX2/SHH/SIX1/SIX2/SOSTDC1/SOX13/SOX17/SOX18/SPN/S…	94
34	Up	GO:0050900	leukocyte migration	115/2245	396/18888	0.290404	2.44327	10.6605	1.26877e-20	2.15392e-18	1.30412e-18	ADTRP/AIF1/ALOX5/ANXA1/ARHGEF5/ASB2/ASCL2/B4GALT1/BDKRB1/BMP5/C3AR1/CCL3/CCL3L3/CCL5/CCR1/CD177/CD300A/CD34/CD74/CD9/CHST4/CMKLR1/CSF1R/CSF3R/CX3CR1/CXCL1/CXCL12/CXCL2/CXCL3/CXCL6/CYP19A1/DBH/DOCK8/DPEP1/DPP4/EDN3/EDNRB/EMILIN1/F11R/F2RL1/F7/FCER1G/FLT1/GATA3/GCNT1/GCSAM/GPSM3/GREM1/HCK/HMOX1/HOXA7/ICAM1/IL1A/IL1B/IL1R1/IL34/IL6R/ITGA1/ITGA4/ITGA9/ITGAL/ITGB2/ITGB7/LBP/LCK/LGALS3/LYN/LYVE1/MCOLN2…	115
35	Up	GO:0055123	digestive system development	60/2245	145/18888	0.413793	3.48139	11.0162	1.80266e-19	2.97285e-17	1.79995e-17	AGR2/ALDH1A2/ALX4/CDKN1C/CDX2/CLDN18/CLMP/COL3A1/CPS1/CYP1A1/EDNRB/EPHB3/FGF10/FOXF1/FOXF2/FOXL1/GATA4/GATA5/GATA6/GLI1/HLX/HMGCS2/HNF1B/HOXA13/HOXA5/HOXD13/ID2/IGF2/IHH/IL6ST/KCNQ1/KLF5/LGR4/MIXL1/MYOCD/NKX2-3/NKX3-2/OTC/OVOL2/PCSK5/PDGFRA/PDX1/PKDCC/PRDM1/RARRES2/RBPMS2/SFRP5/SHH/SHOX2/SIX2/SOX10/SOX17/STRA6/TCF21/TGFB2/TP63/WLS/WNT11/WNT5A/YAP1	60
36	Up	GO:0048565	digestive tract development	57/2245	133/18888	0.428571	3.60573	11.0757	1.94013e-19	3.11067e-17	1.8834e-17	AGR2/ALDH1A2/ALX4/CDX2/CLDN18/CLMP/COL3A1/CPS1/CYP1A1/EDNRB/EPHB3/FGF10/FOXF1/FOXF2/FOXL1/GATA4/GATA5/GATA6/GLI1/HLX/HMGCS2/HNF1B/HOXA13/HOXA5/HOXD13/ID2/IHH/IL6ST/KCNQ1/KLF5/LGR4/MIXL1/MYOCD/NKX2-3/NKX3-2/OTC/OVOL2/PCSK5/PDGFRA/PDX1/PKDCC/PRDM1/RARRES2/RBPMS2/SFRP5/SHH/SHOX2/SIX2/SOX10/SOX17/STRA6/TCF21/TGFB2/TP63/WNT11/WNT5A/YAP1	57
37	Up	GO:0072006	nephron development	63/2245	158/18888	0.398734	3.3547	10.9161	2.21139e-19	3.44977e-17	2.08871e-17	ACTA2/AGT/AGTR2/ANGPT1/ANGPT2/AQP1/BMP2/BMP4/CALB1/CD34/EDNRA/EDNRB/ENPEP/EYA1/FGF8/FMN1/FOXC1/FOXC2/FOXD1/GATA3/GDNF/GPC3/GREM1/HEYL/HNF1B/HOXA11/HOXB7/HOXD11/HS3ST3A1/IL6R/IRX1/IRX2/IRX3/JAG1/KIF26B/LAMA5/LGR4/NID1/NPHS1/NPNT/OSR1/PAX2/PAX8/PDGFRA/PECAM1/PODXL/SERPINB7/SHH/SIX1/SIX2/SIX4/SLC22A6/SULF1/SULF2/TACSTD2/TCF21/TEK/TFAP2B/WNT1/WNT11/WNT6/WT1/YAP1	63
38	Up	GO:0035107	appendage morphogenesis	61/2245	150/18888	0.406667	3.42143	10.9353	2.55964e-19	3.78826e-17	2.29366e-17	ALDH1A2/ALX4/BMP4/COL2A1/COL3A1/COL6A1/CRABP2/DKK1/ECE1/EVX2/FBN2/FBXW4/FGF10/FGF4/FGF8/FMN1/FRAS1/FREM2/FZD6/GJA1/GPC3/GREM1/GRHL2/HAND2/HOXA10/HOXA11/HOXA13/HOXA9/HOXC10/HOXC11/HOXD10/HOXD12/HOXD13/HOXD9/IHH/LEF1/MSX1/MSX2/OSR1/OSR2/PCSK5/PITX1/PKDCC/PRRX1/RARG/RSPO2/RUNX2/SALL4/SHH/SHOX2/TBX2/TBX3/TBX4/TBX5/TFAP2A/TFAP2B/TGFB2/TP63/TWIST1/WNT5A/ZBTB16	61
39	Up	GO:0035108	limb morphogenesis	61/2245	150/18888	0.406667	3.42143	10.9353	2.55964e-19	3.78826e-17	2.29366e-17	ALDH1A2/ALX4/BMP4/COL2A1/COL3A1/COL6A1/CRABP2/DKK1/ECE1/EVX2/FBN2/FBXW4/FGF10/FGF4/FGF8/FMN1/FRAS1/FREM2/FZD6/GJA1/GPC3/GREM1/GRHL2/HAND2/HOXA10/HOXA11/HOXA13/HOXA9/HOXC10/HOXC11/HOXD10/HOXD12/HOXD13/HOXD9/IHH/LEF1/MSX1/MSX2/OSR1/OSR2/PCSK5/PITX1/PKDCC/PRRX1/RARG/RSPO2/RUNX2/SALL4/SHH/SHOX2/TBX2/TBX3/TBX4/TBX5/TFAP2A/TFAP2B/TGFB2/TP63/TWIST1/WNT5A/ZBTB16	61
40	Up	GO:1904018	positive regulation of vasculature development	70/2245	190/18888	0.368421	3.09966	10.6832	4.01401e-19	5.79222e-17	3.50698e-17	ACVRL1/ADAM12/ADM/ADM2/ANGPT2/ANGPT4/ANGPTL3/ANGPTL4/ANXA3/APELA/APLNR/AQP1/C3/C3AR1/CCBE1/CD34/CD40/CDH5/CHI3L1/CTSH/CX3CR1/CXCL12/CYBB/CYP1B1/EMILIN1/EMILIN2/EPHA1/ETS1/FGF18/FLT1/FOXC2/GATA2/GATA4/GATA6/GREM1/GRN/HK2/HMGA2/HMOX1/IL1A/IL1B/ITGA5/ITGAX/KDR/KLF4/LRG1/MDK/NOS3/NRP1/PGF/PIK3R6/PTGIS/RRAS/RUNX1/S100A1/SASH1/SERPINE1/SMOC2/SPHK1/TEK/TERT/TGFB1/TGFBR2/THBS1/TIE1/TNFSF12/TWIST1/VEGFC/W…	70
41	Up	GO:0043583	ear development	77/2245	223/18888	0.345291	2.90506	10.5105	5.79809e-19	8.16258e-17	4.94214e-17	ALDH1A3/ATOH1/ATP8B1/BMP2/BMP4/BMP5/CALB1/CEBPA/CEBPD/CLRN1/COL2A1/CTHRC1/CYTL1/ECE1/EDNRA/ESRP1/EYA1/FGF10/FGF20/FGF8/FREM2/FRZB/FZD6/GATA2/GATA3/GBX2/GJB2/GJB6/GRHL3/GRXCR1/GSC/HEY2/HOXA1/HOXA13/HOXA2/HPN/ITGA8/JAG1/KCNQ1/LGR5/LHX3/LRIG3/MAF/MCOLN3/MSX1/MYO7A/NEUROG1/NKX3-2/OSR1/OSR2/OTOL1/OTOP1/PAX2/PAX8/PHOX2B/POU4F3/PRRX1/PTK7/ROR1/SDC4/SHH/SIX1/SIX2/SIX4/SLC44A4/STRA6/TBX18/TBX2/TBX3/TCF15/…	77
42	Up	GO:0001667	ameboidal-type cell migration	130/2245	498/18888	0.261044	2.19626	9.93626	8.96905e-19	1.2326e-16	7.46297e-17	ACTA2/ACVRL1/ADAMTS9/ADTRP/AGT/AGTR2/ANGPT1/ANGPT2/ANGPT4/ANXA1/ANXA3/APELA/APOA1/APOE/APOH/AQP1/ARHGDIB/BMP10/BMP4/CARD10/CCBE1/CD248/CD40/CDH5/CEACAM1/CER1/CLEC14A/CTSH/CYP1B1/DAAM2/DCN/DDR2/DPP4/EDN3/EDNRA/EDNRB/ENPP2/EPHB4/EPPK1/ETS1/FERMT1/FGF10/FGF18/FGF4/FGF8/FGFBP1/FN1/FOLR1/FOXC2/GATA2/GATA3/GBX2/GDF6/GDNF/GJA1/GPC3/GREM1/GRN/HAND2/HAS2/HMOX1/HRG/ID1/ITGA4/ITGB4/ITGB7/KANK2/KDR/KLF4/KRT1…	130
43	Up	GO:0042476	odontogenesis	56/2245	133/18888	0.421053	3.54247	10.8068	1.09405e-18	1.46857e-16	8.89164e-17	ADM/APCDD1/AQP1/AQP3/BMP2/BMP4/CD34/CFTR/COL1A1/COL1A2/CSF3R/DLX3/EDAR/FAM20A/FGF10/FGF4/FGF8/FOXC1/FOXI3/FST/GATA6/HAND1/HAND2/ID3/ITGB6/LAMA5/LAMB1/LEF1/MSX1/MSX2/NGFR/NKX2-3/ODAM/OSR1/OSR2/PAX9/PDGFRA/PERP/PITX2/RSPO2/RUNX2/SCN10A/SERPINE1/SHH/SOSTDC1/SP6/SSUH2/TCIRG1/TFAP2A/TGFB2/TNFRSF11B/TP63/WDR72/WLS/WNT10A/WNT6	56
44	Up	GO:0050678	regulation of epithelial cell proliferation	113/2245	407/18888	0.277641	2.3359	10.0065	1.24127e-18	1.62833e-16	9.85892e-17	ACVRL1/AGTR1/ALDH1A2/ALOX5/APELA/APLNR/APOE/APOH/AREG/B4GALT1/BMP4/BMP5/CAV1/CAV2/CCL5/CCND1/CDH3/CDKN1C/CEACAM1/CLDN1/CXCL12/DAB2/DBH/EDNRB/EGFL7/EPPK1/EREG/ESRP2/EYA1/FA2H/FGF10/FGFBP1/FLT1/GATA2/GATA3/GLI1/GPBAR1/GPC3/GRN/HAS2/HLX/HMOX1/HOXA5/HPN/HSPG2/IGF1/IGF2/IHH/IRF6/ITGA4/JAG1/KDR/LAMA5/LAMB1/LAMC1/LIMS2/LRG1/MARVELD3/MDK/NGFR/NKX2-3/NKX3-1/NOD2/NR2F2/NRP1/NUPR1/ODAM/OSR1/OSR2/OVOL1/OVOL2…	113
45	Up	GO:0007159	leukocyte cell-cell adhesion	115/2245	419/18888	0.274463	2.30916	9.95293	1.60479e-18	2.05842e-16	1.2463e-16	ADTRP/AIF1/ALOX5/ANXA1/APOA4/ARG1/ASCL2/BMP4/CARD11/CAV1/CCL5/CD177/CD28/CD300A/CD4/CD44/CD55/CD70/CD74/CD86/CEBPB/CHST4/CX3CR1/CXCL12/DOCK8/DPP4/EBI3/EPO/ETS1/F11R/FGL1/FGL2/GATA3/GCNT1/GPNMB/HAS2/HFE/HHLA2/HLA-DMB/HLA-DOA/HLA-DPA1/HLA-DQB1/HLA-DQB2/HLA-DRB1/HLA-E/HLA-G/HLX/ICAM1/ICOSLG/IDO1/IGF1/IGF2/IHH/IL18/IL1A/IL1B/IL2RG/IL4R/IL6ST/ITGA4/ITGA5/ITGAL/ITGB2/ITGB7/KLF4/LAPTM5/LCK/LEF1/LGALS1/L…	115
46	Up	GO:1900046	regulation of hemostasis	39/2245	71/18888	0.549296	4.62142	11.2281	2.07053e-18	2.50203e-16	1.51489e-16	ADAMTS18/ADTRP/ANXA2/APOE/APOH/CAV1/CD36/CD9/CEACAM1/COMP/EMILIN1/EMILIN2/F11/F2/F2RL1/F7/FGA/FGB/FGG/FOXA2/HPSE/HRG/KNG1/NOS3/PDGFRA/PLAT/PLAU/PLG/PRKG1/PROC/SERPINC1/SERPINE1/SERPINF2/SERPING1/TFPI/THBD/THBS1/TSPAN8/VTN	39
47	Up	GO:0048736	appendage development	68/2245	186/18888	0.365591	3.07585	10.4492	2.08069e-18	2.50203e-16	1.51489e-16	ALDH1A2/ALX4/BMP4/COL2A1/COL3A1/COL6A1/COMP/CRABP2/DKK1/ECE1/EVX2/FBN2/FBXW4/FGF10/FGF4/FGF8/FMN1/FRAS1/FREM2/FZD6/GJA1/GPC3/GREM1/GRHL2/HAND2/HOXA10/HOXA11/HOXA13/HOXA9/HOXC10/HOXC11/HOXD10/HOXD12/HOXD13/HOXD9/IHH/IRF6/ITGB4/KREMEN2/LEF1/MEOX2/MSX1/MSX2/OSR1/OSR2/PCSK5/PITX1/PITX2/PKDCC/PRRX1/RARG/RSPO2/RSPO4/RUNX2/SALL4/SHH/SHOX2/TBX2/TBX3/TBX4/TBX5/TFAP2A/TFAP2B/TGFB2/TP63/TWIST1/WNT5A/ZBTB16	68
48	Up	GO:0060173	limb development	68/2245	186/18888	0.365591	3.07585	10.4492	2.08069e-18	2.50203e-16	1.51489e-16	ALDH1A2/ALX4/BMP4/COL2A1/COL3A1/COL6A1/COMP/CRABP2/DKK1/ECE1/EVX2/FBN2/FBXW4/FGF10/FGF4/FGF8/FMN1/FRAS1/FREM2/FZD6/GJA1/GPC3/GREM1/GRHL2/HAND2/HOXA10/HOXA11/HOXA13/HOXA9/HOXC10/HOXC11/HOXD10/HOXD12/HOXD13/HOXD9/IHH/IRF6/ITGB4/KREMEN2/LEF1/MEOX2/MSX1/MSX2/OSR1/OSR2/PCSK5/PITX1/PITX2/PKDCC/PRRX1/RARG/RSPO2/RSPO4/RUNX2/SALL4/SHH/SHOX2/TBX2/TBX3/TBX4/TBX5/TFAP2A/TFAP2B/TGFB2/TP63/TWIST1/WNT5A/ZBTB16	68
49	Up	GO:0045766	positive regulation of angiogenesis	68/2245	187/18888	0.363636	3.0594	10.3945	2.89614e-18	3.41153e-16	2.06556e-16	ACVRL1/ADAM12/ADM/ADM2/ANGPT2/ANGPT4/ANGPTL3/ANGPTL4/ANXA3/APELA/APLNR/AQP1/C3/C3AR1/CCBE1/CD34/CD40/CDH5/CHI3L1/CTSH/CX3CR1/CYBB/CYP1B1/EMILIN1/EMILIN2/EPHA1/ETS1/FGF18/FLT1/FOXC2/GATA2/GATA4/GATA6/GREM1/GRN/HK2/HMGA2/HMOX1/IL1A/IL1B/ITGA5/ITGAX/KDR/KLF4/LRG1/MDK/NOS3/NRP1/PGF/PIK3R6/PTGIS/RRAS/RUNX1/S100A1/SASH1/SERPINE1/SMOC2/SPHK1/TEK/TERT/TGFBR2/THBS1/TIE1/TNFSF12/TWIST1/VEGFC/WNT5A/XBP1	68
50	Up	GO:1903034	regulation of response to wounding	66/2245	179/18888	0.368715	3.10213	10.3785	3.95124e-18	4.56131e-16	2.76171e-16	ADAMTS18/ADTRP/ALOX5/ANXA1/ANXA2/APOE/APOH/CAV1/CD36/CD9/CEACAM1/CLDN1/CLDN19/CLDN3/CLDN4/CLEC7A/DDR2/DUOX2/EMILIN1/EMILIN2/EPPK1/F11/F2/F2RL1/F7/FERMT1/FGA/FGB/FGG/FIGNL2/FOXA2/FOXC2/GRN/HPSE/HRG/KLF4/KNG1/MDK/MYLK/MYOZ1/NOS3/OCLN/PDGFRA/PHLDB2/PLAT/PLAU/PLG/PRKG1/PROC/PTPN6/RREB1/SERPINC1/SERPINE1/SERPINF2/SERPING1/SMOC2/TFPI/THBD/THBS1/TNFAIP3/TNFRSF12A/TSPAN8/VIL1/VTN/WFDC1/XBP1	66
51	Up	GO:0003007	heart morphogenesis	85/2245	269/18888	0.315985	2.6585	10.0621	4.95234e-18	5.57048e-16	3.37272e-16	ACTC1/ACVRL1/ADAMTS1/ALDH1A2/ALPK2/ANKRD1/APLNR/ASB2/BMP10/BMP2/BMP4/BMP5/CLDN5/COL2A1/COL5A1/DKK1/DLC1/DSP/EDNRA/EPHB4/EYA1/FGF8/FHL2/FOLR1/FOXC1/FOXC2/FOXF1/FOXH1/GATA3/GATA4/GATA5/GATA6/GJA1/GJA5/GRHL2/HAND1/HAND2/HAS2/HEY2/HEYL/IHH/JAG1/LBX1/MSX1/MSX2/MYL3/NOS3/NRP1/OVOL2/PITX2/PKP2/POU4F1/PPP1R13L/RBM20/RBP4/SHH/SHOX2/SIX1/SLIT2/SLIT3/SMAD6/SNAI1/SNAI2/SOX17/SOX18/TBX2/TBX20/TBX3/TBX5/TEK/TG…	85
52	Up	GO:0030193	regulation of blood coagulation	38/2245	69/18888	0.550725	4.63345	11.105	5.01845e-18	5.57048e-16	3.37272e-16	ADAMTS18/ADTRP/ANXA2/APOE/APOH/CAV1/CD36/CD9/CEACAM1/EMILIN1/EMILIN2/F11/F2/F2RL1/F7/FGA/FGB/FGG/FOXA2/HPSE/HRG/KNG1/NOS3/PDGFRA/PLAT/PLAU/PLG/PRKG1/PROC/SERPINC1/SERPINE1/SERPINF2/SERPING1/TFPI/THBD/THBS1/TSPAN8/VTN	38
53	Up	GO:0022409	positive regulation of cell-cell adhesion	96/2245	325/18888	0.295385	2.48518	9.91905	5.79521e-18	6.31131e-16	3.82127e-16	AIF1/ALOX5/ANXA1/CARD11/CAV1/CCL5/CD28/CD4/CD44/CD55/CD70/CD74/CD86/CEACAM6/CHST4/DOCK8/DPP4/EBI3/EMILIN1/EMILIN2/EPO/ETS1/F11R/FGA/FGB/FGG/FOXA1/FOXA2/GATA3/GCNT1/HAS2/HHLA2/HLA-DMB/HLA-DOA/HLA-DPA1/HLA-DQB1/HLA-DQB2/HLA-DRB1/HLA-E/HLA-G/HLX/ICOSLG/IGF1/IGF2/IHH/IL18/IL1A/IL1B/IL2RG/IL4R/IL6ST/ITGA4/ITGB2/KIF26B/LCK/LEF1/LGALS1/LILRB2/LYN/MDK/NCKAP1L/NFKBIZ/NOD2/PCK1/PIEZO1/PIK3R6/PODXL/PTPN6/PT…	96
54	Up	GO:0072009	nephron epithelium development	52/2245	121/18888	0.429752	3.61566	10.6011	6.41103e-18	6.85268e-16	4.14905e-16	AGT/AGTR2/AQP1/BMP2/BMP4/CALB1/CD34/EDNRA/EDNRB/EYA1/FGF8/FMN1/FOXC1/FOXC2/FOXD1/GATA3/GDNF/GPC3/GREM1/HEYL/HNF1B/HOXA11/HOXB7/HOXD11/HS3ST3A1/IRX1/IRX2/IRX3/JAG1/KIF26B/LAMA5/LGR4/NPHS1/NPNT/OSR1/PAX2/PAX8/PECAM1/PODXL/SHH/SIX1/SIX2/SIX4/SLC22A6/TACSTD2/TCF21/TFAP2B/WNT1/WNT11/WNT6/WT1/YAP1	52
55	Up	GO:0001819	positive regulation of cytokine production	128/2245	500/18888	0.256	2.15382	9.60351	9.36686e-18	9.83009e-16	5.95176e-16	ADCYAP1/AFAP1L2/AGPAT2/AGT/AIF1/ALOX15B/ANXA1/APOA2/C3/C3AR1/CARD11/CCBE1/CCL3/CD244/CD28/CD34/CD36/CD4/CD55/CD74/CD84/CD86/CEBPB/CHI3L1/CLEC7A/CSF1R/CYBA/CYBB/CYP1B1/DHX58/EBI3/EREG/F2RL1/FCER1G/FCGR2A/FCN1/FERMT1/GATA3/GATA4/GATA6/GPSM3/GSDMD/HGF/HHLA2/HLA-DPA1/HLA-E/HLA-G/HMOX1/HPSE/IDO1/IFI16/IL12RB2/IL18/IL18R1/IL1A/IL1B/IL1R1/IL1RAP/IL4R/IL6R/IL6ST/IRF8/ISG15/LAPTM5/LBP/LILRB2/LRRK2/LTB/LUM…	128
56	Up	GO:0030326	embryonic limb morphogenesis	52/2245	122/18888	0.42623	3.58602	10.5245	9.89742e-18	1.00224e-15	6.06822e-16	ALDH1A2/ALX4/BMP4/CRABP2/DKK1/ECE1/FBN2/FBXW4/FGF4/FGF8/FRAS1/FREM2/FZD6/GJA1/GPC3/GREM1/GRHL2/HAND2/HOXA10/HOXA11/HOXA13/HOXA9/HOXC10/HOXC11/HOXD10/HOXD12/HOXD13/HOXD9/IHH/LEF1/MSX1/MSX2/OSR1/OSR2/PITX1/PRRX1/RARG/RSPO2/RUNX2/SALL4/SHH/SHOX2/TBX2/TBX3/TBX4/TBX5/TFAP2A/TGFB2/TP63/TWIST1/WNT5A/ZBTB16	52
57	Up	GO:0035113	embryonic appendage morphogenesis	52/2245	122/18888	0.42623	3.58602	10.5245	9.89742e-18	1.00224e-15	6.06822e-16	ALDH1A2/ALX4/BMP4/CRABP2/DKK1/ECE1/FBN2/FBXW4/FGF4/FGF8/FRAS1/FREM2/FZD6/GJA1/GPC3/GREM1/GRHL2/HAND2/HOXA10/HOXA11/HOXA13/HOXA9/HOXC10/HOXC11/HOXD10/HOXD12/HOXD13/HOXD9/IHH/LEF1/MSX1/MSX2/OSR1/OSR2/PITX1/PRRX1/RARG/RSPO2/RUNX2/SALL4/SHH/SHOX2/TBX2/TBX3/TBX4/TBX5/TFAP2A/TGFB2/TP63/TWIST1/WNT5A/ZBTB16	52
58	Up	GO:0072073	kidney epithelium development	59/2245	152/18888	0.388158	3.26571	10.3006	1.39965e-17	1.39289e-15	8.43346e-16	AGT/AGTR2/AQP1/BMP2/BMP4/CALB1/CD34/CER1/EDNRA/EDNRB/EPCAM/EYA1/FGF8/FMN1/FOXC1/FOXC2/FOXD1/GATA3/GDNF/GPC3/GREM1/HEYL/HNF1B/HOXA11/HOXB7/HOXD11/HS3ST3A1/IRX1/IRX2/IRX3/JAG1/KANK2/KIF26B/LAMA5/LGR4/NPHS1/NPNT/OSR1/PAX2/PAX8/PECAM1/PODXL/SDC4/SHH/SIM1/SIX1/SIX2/SIX4/SLC22A6/SLIT2/SMAD6/TACSTD2/TCF21/TFAP2B/WNT1/WNT11/WNT6/WT1/YAP1	59
59	Up	GO:0050818	regulation of coagulation	39/2245	74/18888	0.527027	4.43407	10.8707	1.42645e-17	1.3955e-15	8.44927e-16	ADAMTS18/ADTRP/ANXA2/APOE/APOH/CAV1/CD36/CD9/CEACAM1/EMILIN1/EMILIN2/F11/F2/F2RL1/F7/FGA/FGB/FGG/FOXA2/HPSE/HRG/KNG1/NOS3/PDGFRA/PLAT/PLAU/PLG/PRKG1/PROC/PROCR/SERPINC1/SERPINE1/SERPINF2/SERPING1/TFPI/THBD/THBS1/TSPAN8/VTN	39
60	Up	GO:0001823	mesonephros development	47/2245	104/18888	0.451923	3.80219	10.5243	2.14443e-17	2.06294e-15	1.24904e-15	AGT/AGTR2/BMP2/BMP4/CALB1/CER1/EPCAM/EYA1/FGF10/FGF8/FMN1/FOXC1/FOXC2/FOXD1/GATA3/GDNF/GPC3/GREM1/HNF1B/HOXA11/HOXB7/HOXD11/HS3ST3A1/KIF26B/LAMA5/LGR4/NPNT/OSR1/OSR2/PAX2/PAX8/REN/SDC4/SHH/SIM1/SIX1/SIX2/SIX4/SLIT2/SMAD6/TACSTD2/TCF21/WNT1/WNT11/WNT6/WT1/ZBTB16	47
61	Up	GO:0006935	chemotaxis	121/2245	466/18888	0.259657	2.18459	9.50966	2.33069e-17	2.20537e-15	1.33527e-15	ACKR3/AGTR1/AIF1/ALOX5/ANGPT1/ANGPT2/ANXA1/APOA1/ARHGEF16/ARHGEF5/BIN2/BMP4/C3AR1/CCL3/CCL3L3/CCL5/CCR1/CD74/CMKLR1/CMTM5/CMTM7/CMTM8/CSF1R/CSF3R/CX3CR1/CXCL1/CXCL12/CXCL14/CXCL2/CXCL3/CXCL6/CYP19A1/DOCK2/DPEP1/DPP4/EDN3/EDNRB/ENPP2/F2RL1/F7/FCER1G/FES/FGF10/FGF18/FGF4/FGF8/FLT1/GDNF/GPNMB/GPSM3/GREM1/HGF/HOXB9/HRG/IL1B/IL34/IL6R/ITGA1/ITGA9/ITGB2/KDR/LBP/LEF1/LGALS3/LGR6/LPAR1/LRTM1/LSP1/LYN/MDK…	121
62	Up	GO:0001656	metanephros development	44/2245	93/18888	0.473118	3.98052	10.5824	2.59392e-17	2.41486e-15	1.46211e-15	AGTR2/AQP1/BMP4/CALB1/CD34/CTSH/EYA1/FBN1/FGF10/FGF8/FMN1/FOXC2/FOXD1/FRAS1/GDF6/GDNF/GPC3/GREM1/HNF1B/HOXA11/HOXC11/ID3/IRX1/IRX2/IRX3/ITGA8/KIF26B/LGR4/NKX3-1/OSR1/OSR2/PAX2/PAX8/PDGFRA/SHH/SIX1/SIX2/SIX4/SLC22A6/SOX17/TCF21/TFAP2B/WT1/YAP1	44
63	Up	GO:0042330	taxis	121/2245	468/18888	0.258547	2.17525	9.45545	3.33203e-17	3.05277e-15	1.84834e-15	ACKR3/AGTR1/AIF1/ALOX5/ANGPT1/ANGPT2/ANXA1/APOA1/ARHGEF16/ARHGEF5/BIN2/BMP4/C3AR1/CCL3/CCL3L3/CCL5/CCR1/CD74/CMKLR1/CMTM5/CMTM7/CMTM8/CSF1R/CSF3R/CX3CR1/CXCL1/CXCL12/CXCL14/CXCL2/CXCL3/CXCL6/CYP19A1/DOCK2/DPEP1/DPP4/EDN3/EDNRB/ENPP2/F2RL1/F7/FCER1G/FES/FGF10/FGF18/FGF4/FGF8/FLT1/GDNF/GPNMB/GPSM3/GREM1/HGF/HOXB9/HRG/IL1B/IL34/IL6R/ITGA1/ITGA9/ITGB2/KDR/LBP/LEF1/LGALS3/LGR6/LPAR1/LRTM1/LSP1/LYN/MDK…	121
64	Up	GO:0030199	collagen fibril organization	36/2245	66/18888	0.545455	4.58911	10.7275	5.73869e-17	5.17558e-15	3.13363e-15	ADAMTS12/ADAMTS14/ADAMTS2/AEBP1/ANXA2/BMP1/COL12A1/COL14A1/COL18A1/COL1A1/COL1A2/COL27A1/COL2A1/COL3A1/COL5A1/COL5A2/COL5A3/COL6A1/COMP/CYP1B1/DDR2/EMILIN1/FKBP10/FMOD/FOXC1/FOXC2/GREM1/LOXL1/LOXL2/LOXL4/LUM/P4HA1/SERPINF2/SERPINH1/TGFB2/TLL1	36
65	Up	GO:0048762	mesenchymal cell differentiation	83/2245	269/18888	0.30855	2.59594	9.68255	6.04109e-17	5.36449e-15	3.248e-15	AGT/ALDH1A2/ALX1/BAMBI/BMP2/BMP4/BMP5/COL1A1/CYP26C1/DAB2/EDN3/EDNRA/EDNRB/FGF10/FGF8/FN1/FOLR1/FOXA1/FOXA2/FOXC1/FOXC2/FOXF2/FRZB/GATA3/GATA5/GBX2/GDNF/GREM1/GSC/HAND2/HAS2/HEY2/HEYL/HGF/HMGA2/HPN/IGF1/IL1B/JAG1/LAMA5/LEF1/LOXL2/LRG1/MDK/MSX1/MSX2/NRP1/NRTN/OSR1/OVOL2/PAX2/PHLDB2/PHOX2B/PITX2/RGCC/S100A4/SEMA3B/SEMA3D/SEMA3G/SHH/SIX1/SIX2/SNAI1/SNAI2/SOX10/SP6/TBX20/TBX3/TBX5/TCF21/TGFB1/TGFB2/T…	83
66	Up	GO:0003206	cardiac chamber morphogenesis	52/2245	127/18888	0.409449	3.44484	10.1531	7.95058e-17	6.95315e-15	4.20988e-15	ADAMTS1/APLNR/BMP10/BMP2/BMP4/BMP5/DSP/EDNRA/FGF8/FHL2/FOXC1/FOXC2/FOXF1/FOXH1/GATA3/GATA4/GATA6/GRHL2/HAND1/HAND2/HEY2/HEYL/JAG1/MSX2/MYL3/NOS3/NRP1/OVOL2/PKP2/POU4F1/PPP1R13L/RBP4/SHOX2/SLIT2/SLIT3/SMAD6/TBX2/TBX20/TBX3/TBX5/TEK/TGFB1/TGFB2/TGFBR2/TGFBR3/TNNC1/TNNI1/TNNT2/TPM1/WNT11/WNT2/WNT5A	52
67	Up	GO:0002697	regulation of immune effector process	105/2245	385/18888	0.272727	2.29455	9.42547	8.2998e-17	7.15021e-15	4.32919e-15	A2M/ACP5/AHR/ANGPT1/ANXA1/APOA1/APOA2/ARG1/ASCL2/BST2/C3/C4BPB/CD177/CD244/CD28/CD300A/CD36/CD55/CD74/CD84/CD86/CEACAM1/CFH/CLC/CLEC7A/CR1L/CX3CR1/CXCL6/DHX58/DNASE1L3/ENPP3/F2RL1/FCN1/FES/FGL2/FOXF1/GATA2/GATA3/GRN/HFE/HLA-C/HLA-DMB/HLA-DRB1/HLA-E/HLA-G/HLX/HPX/ICAM1/IL18/IL18R1/IL1B/IL1R1/IL4R/ITGAM/ITGB2/KLRC2/LAPTM5/LBP/LGALS3/LYN/MBL2/MICB/MR1/NCKAP1L/NFKBIZ/NOD1/NOD2/PCK1/PIK3R6/PLA2G5/PLCG…	105
68	Up	GO:0007160	cell-matrix adhesion	77/2245	241/18888	0.319502	2.68809	9.68663	9.16644e-17	7.78069e-15	4.71092e-15	ACTN3/ACVRL1/ADAMTS12/ADAMTS9/AJUBA/ANGPTL3/ANXA2/ARHGAP6/BCAM/CD34/CD36/CD44/CDH11/CEACAM6/COL13A1/COL17A1/COL3A1/COL5A3/DLC1/ECM2/EMILIN1/EPHA1/FERMT1/FGA/FGB/FGG/FGL1/FMN1/FN1/FREM1/GREM1/HOXA7/HOXD3/HPSE/HRG/ITGA1/ITGA11/ITGA4/ITGA5/ITGA8/ITGA9/ITGAL/ITGAM/ITGAX/ITGB2/ITGB4/ITGB5/ITGB6/ITGB7/JAG1/KDR/LYVE1/MMP14/MUC4/NID1/NID2/NPNT/NRP1/ONECUT1/PHLDB2/PKHD1/PLAU/POSTN/RHOD/RRAS/S100A10/SDC4/S…	77
69	Up	GO:0061326	renal tubule development	46/2245	104/18888	0.442308	3.7213	10.2205	1.32031e-16	1.10447e-14	6.68717e-15	AGT/AGTR2/AQP1/BMP2/BMP4/CALB1/COL4A1/EYA1/FGF8/FMN1/FOXD1/GATA3/GDNF/GPC3/GREM1/HEYL/HNF1B/HOXA11/HOXB7/HOXD11/HS3ST3A1/IRX1/IRX2/IRX3/JAG1/KIF26B/LAMA5/LGR4/LGR5/NPNT/OSR1/PAX2/PAX8/SHH/SIX1/SIX2/SIX4/SLC22A6/TACSTD2/TCF21/TFAP2B/WNT1/WNT11/WNT6/WT1/YAP1	46
70	Up	GO:2000027	regulation of animal organ morphogenesis	42/2245	89/18888	0.47191	3.97035	10.316	1.54049e-16	1.27024e-14	7.69085e-15	AGT/AGTR2/APCDD1/BMP2/BMP4/CD34/DKK1/FGF10/FGF8/GATA3/GATA5/GDNF/GREM1/GRHL3/HGF/HOXA11/HOXB7/HOXC11/LGR4/MSX1/NGFR/PAX2/PAX8/PAX9/PKHD1/PTK7/RSPO2/RUNX2/SHH/SIX1/SIX2/SIX4/SNAI2/SP6/SULF1/TACSTD2/TNFRSF11B/WNT10A/WNT2/WNT3A/WNT5A/WT1	42
71	Up	GO:0060348	bone development	71/2245	215/18888	0.330233	2.77837	9.6318	2.0586e-16	1.67355e-14	1.01328e-14	ACP5/ACTN3/ADAMTS12/ANXA2/BGN/BMP2/BMP4/BNC2/CDX1/CER1/CHAD/CLDN18/COL13A1/COL1A1/COL27A1/COL2A1/COL3A1/COL6A1/COMP/DDR2/FBN1/FGF18/FGF4/FGF8/FOSL2/FOXC1/FREM1/GH1/GHR/GJA1/GREM1/HAS2/HOXA11/HOXB4/IGF1/IHH/ITGB6/KDR/LEPR/MMP14/MSX1/MSX2/NEUROG1/NOTUM/OGN/OSR2/PAPPA2/PAPSS2/PHOSPHO1/PITX2/PLS3/PTGER4/PTPRC/RARG/RUNX2/SERPINH1/SHOX2/SP5/STC1/SULF1/SULF2/TEK/TFAP2A/TGFBR2/TGM2/TMEM119/TRPV4/TWIST1/T…	71
72	Up	GO:0050867	positive regulation of cell activation	103/2245	380/18888	0.271053	2.28046	9.2609	2.59126e-16	2.07733e-14	1.25775e-14	ACTA2/AIF1/ANXA1/CAPN3/CARD11/CAV1/CCL3/CCL5/CD28/CD4/CD55/CD70/CD74/CD86/CEBPA/CLEC7A/CTSC/DDR2/DOCK8/DPP4/EBI3/EPO/FGF10/GATA3/GP9/HAVCR1/HHLA2/HLA-DMB/HLA-DOA/HLA-DPA1/HLA-DQB1/HLA-DQB2/HLA-DRB1/HLA-E/HLA-G/HLX/ICOSLG/IGF1/IGF2/IHH/IL18/IL1A/IL1B/IL2RG/IL4R/IL6ST/LBP/LCK/LEF1/LGALS1/LILRB2/LRRK2/LYN/MDK/MMP14/NCKAP1L/NFATC2/NFKBIZ/NOD2/PCK1/PEAR1/PIK3R6/PLA2G4A/PLEK/PTPN6/PTPRC/PYCARD/RAG1/RHO…	103
73	Up	GO:0007517	muscle organ development	99/2245	359/18888	0.275766	2.32012	9.27488	2.89154e-16	2.2863e-14	1.38427e-14	ACTC1/ACTN3/ALX4/ANKRD1/ANKRD33/ASB2/ATF3/B4GALNT2/BARX2/BMP10/BMP2/BMP4/CAPN3/CAV1/CAV2/CD164/CHRNA1/CHRND/COL3A1/COL6A1/COL6A3/CRYAB/DES/DSP/EDNRA/EGR2/ERBB3/FGF8/FLNB/FOXC1/FOXC2/FOXH1/GJA1/GSC/HAND1/HEY2/HEYL/HLX/HOXD10/HOXD9/ID3/IGF1/IGF2/ITGA11/JPH2/KLF5/KLHL40/LAMA2/LAMA5/LBX1/LEF1/LMOD3/MEOX2/MKX/MSC/MSX1/MYL3/MYLK/MYOCD/MYOZ1/NEUROG1/NPHS1/NR2F2/NUPR1/P2RX2/PAX3/PAX7/PHOX2B/PITX1/PKP2/PO…	99
74	Up	GO:0008544	epidermis development	104/2245	387/18888	0.268734	2.26096	9.20516	3.50734e-16	2.73573e-14	1.65638e-14	AGPAT2/ALOX15B/ALX4/ANXA1/APCDD1/AQP3/ATOH1/BMP4/BNC1/CDH3/CLDN1/CLDN4/CLRN1/CNFN/COL17A1/COL6A1/CRABP2/DKK1/DLX3/DSG4/DSP/EDAR/EMP1/EREG/ESRP1/ETV4/FA2H/FERMT1/FGF10/FGF20/FLG/FLNB/FOSL2/FOXC1/FOXI3/FOXQ1/FST/FZD6/GAL/GATA6/GDF3/GLI1/GRHL2/GRHL3/GRXCR1/HEY2/HLA-DRB1/HOXA7/HPSE/IGFBP5/IL18/IL1A/IRF6/JAG1/KCNQ1/KLF4/KRT16/KRT3/KRT7/LAMA5/LAMB3/LAMC2/LGR4/LGR5/LSR/MCOLN3/MET/MSX2/MYO7A/NFKBIZ/NGFR/…	104
75	Up	GO:0006909	phagocytosis	75/2245	237/18888	0.316456	2.66246	9.45905	4.1467e-16	3.1913e-14	1.93222e-14	AHSG/AIF1/ALOX15/ANXA1/ANXA3/APOA1/APOA2/BIN2/C3/C4B/C4BPB/CD300A/CD36/CD93/CLEC7A/COLEC12/CRYBA1/CYBA/DOCK2/DYSF/F2RL1/FCER1G/FCGR2A/FCN1/GATA2/GSN/HAVCR1/HCK/IL2RB/IL2RG/IRF8/ITGAL/ITGAM/ITGB2/LBP/LEPR/LYN/MBL2/MET/MFGE8/MSR1/MYO1G/MYO7A/NCF2/NCF4/NCKAP1L/NOD2/P2RY6/PEAR1/PECAM1/PLA2G5/PLCG2/PLD4/PLSCR1/PRTN3/PTPRC/PYCARD/RAB20/RAB34/SH3BP1/SPHK1/SPON2/SRPX/SYK/TGM2/THBS1/TIMD4/TLR2/TLR4/TREM2/…	75
76	Up	GO:1900047	negative regulation of hemostasis	30/2245	50/18888	0.6	5.04802	10.5265	6.34685e-16	4.82026e-14	2.9185e-14	ADAMTS18/ADTRP/ANXA2/APOE/APOH/CD9/CEACAM1/COMP/F11/F2/FGA/FGB/FGG/HRG/KNG1/NOS3/PDGFRA/PLAT/PLAU/PLG/PRKG1/PROC/SERPINE1/SERPINF2/SERPING1/TFPI/THBD/THBS1/TSPAN8/VTN	30
77	Up	GO:0003205	cardiac chamber development	60/2245	168/18888	0.357143	3.00477	9.58607	7.389e-16	5.53887e-14	3.35359e-14	ADAMTS1/APLNR/BMP10/BMP2/BMP4/BMP5/DSP/EDNRA/FGF8/FHL2/FOXC1/FOXC2/FOXF1/FOXH1/GATA3/GATA4/GATA6/GJA5/GRHL2/HAND1/HAND2/HEY2/HEYL/HOXA13/JAG1/MSX2/MYL3/MYOCD/NOS3/NRP1/OVOL2/PAX8/PKP2/POU4F1/PPP1R13L/PRDM1/PTK7/RBP4/SALL4/SHOX2/SLIT2/SLIT3/SMAD6/STRA6/TBX2/TBX20/TBX3/TBX5/TEK/TGFB1/TGFB2/TGFBR2/TGFBR3/TNNC1/TNNI1/TNNT2/TPM1/WNT11/WNT2/WNT5A	60
78	Up	GO:0072080	nephron tubule development	44/2245	100/18888	0.44	3.70188	9.94946	7.66896e-16	5.67503e-14	3.43602e-14	AGT/AGTR2/AQP1/BMP2/BMP4/CALB1/EYA1/FGF8/FMN1/FOXD1/GATA3/GDNF/GPC3/GREM1/HEYL/HNF1B/HOXA11/HOXB7/HOXD11/HS3ST3A1/IRX1/IRX2/IRX3/JAG1/KIF26B/LAMA5/LGR4/NPNT/OSR1/PAX2/PAX8/SHH/SIX1/SIX2/SIX4/SLC22A6/TACSTD2/TCF21/TFAP2B/WNT1/WNT11/WNT6/WT1/YAP1	44
79	Up	GO:0061333	renal tubule morphogenesis	39/2245	81/18888	0.481481	4.05088	10.1061	7.8835e-16	5.75994e-14	3.48744e-14	AGT/AGTR2/BMP2/BMP4/COL4A1/EYA1/FGF8/FMN1/FOXD1/GATA3/GDNF/GPC3/GREM1/HNF1B/HOXA11/HOXB7/HOXD11/HS3ST3A1/IRX1/IRX2/IRX3/KIF26B/LAMA5/LGR4/LGR5/NPNT/OSR1/PAX2/PAX8/SHH/SIX1/SIX2/SIX4/TACSTD2/TCF21/WNT1/WNT11/WNT6/WT1	39
80	Up	GO:0014706	striated muscle tissue development	80/2245	265/18888	0.301887	2.53988	9.27171	8.83836e-16	6.37688e-14	3.86097e-14	ACTC1/ADAMTS9/ALDH1A2/ALPK2/ALPK3/ANKRD1/ASB2/BMP10/BMP2/BMP4/BMP5/COL14A1/DKK1/DSG2/DSP/EDNRA/ERBB3/EYA1/EYA2/FES/FGF20/FGF8/FHL2/FOXC1/FOXC2/FOXH1/GATA4/GATA5/GATA6/GJA1/GJA5/GJB6/GLI1/GREM1/HAND1/HEY2/ID2/IGF1/IRX3/JPH2/LEF1/MSC/MSX1/MSX2/MYL3/MYL7/MYLK3/MYOCD/NOX4/NPPB/NRAP/PDGFRA/PGM5/PKP2/POU4F1/PPP1R13L/PRKG1/RBP4/RGS4/RUNX1/SHH/SHOX2/TBX18/TBX2/TBX20/TBX3/TBX5/TGFB1/TGFB2/TGFBR3/TNNC1/TNN…	80
81	Up	GO:1901342	regulation of vasculature development	98/2245	362/18888	0.270718	2.27765	9.01466	1.516e-15	1.08029e-13	6.54077e-14	ACVRL1/ADAM12/ADAMTS1/ADAMTS9/ADM/ADM2/ALOX5/ANGPT2/ANGPT4/ANGPTL3/ANGPTL4/ANXA3/APELA/APLNR/APOH/AQP1/C3/C3AR1/CCBE1/CD34/CD40/CDH5/CEACAM1/CHI3L1/CLDN5/CREB3L1/CTSH/CX3CR1/CXCL12/CYBB/CYP1B1/DCN/EMILIN1/EMILIN2/EPHA1/ETS1/FGF18/FLT1/FOXC1/FOXC2/GATA2/GATA4/GATA6/GPNMB/GREM1/GRN/HHEX/HK2/HLA-G/HMGA2/HMOX1/HOXA5/HRG/HSPG2/HTATIP2/IL1A/IL1B/ISM1/ITGA5/ITGAX/KDR/KLF4/LRG1/MDK/NOS3/NPPB/NRP1/PF4/PGF…	98
82	Up	GO:0045765	regulation of angiogenesis	96/2245	353/18888	0.271955	2.28805	8.9722	2.16233e-15	1.52207e-13	9.21557e-14	ACVRL1/ADAM12/ADAMTS1/ADAMTS9/ADM/ADM2/ALOX5/ANGPT2/ANGPT4/ANGPTL3/ANGPTL4/ANXA3/APELA/APLNR/APOH/AQP1/C3/C3AR1/CCBE1/CD34/CD40/CDH5/CEACAM1/CHI3L1/CLDN5/CREB3L1/CTSH/CX3CR1/CYBB/CYP1B1/DCN/EMILIN1/EMILIN2/EPHA1/ETS1/FGF18/FLT1/FOXC1/FOXC2/GATA2/GATA4/GATA6/GPNMB/GREM1/GRN/HHEX/HK2/HLA-G/HMGA2/HMOX1/HOXA5/HRG/HSPG2/HTATIP2/IL1A/IL1B/ISM1/ITGA5/ITGAX/KDR/KLF4/LRG1/MDK/NOS3/NPPB/NRP1/PF4/PGF/PIK3R6…	96
83	Up	GO:0097529	myeloid leukocyte migration	74/2245	239/18888	0.309623	2.60497	9.17092	2.40725e-15	1.67405e-13	1.01358e-13	AIF1/ANXA1/ARHGEF5/B4GALT1/C3AR1/CCL3/CCL3L3/CCL5/CCR1/CD177/CD300A/CD74/CD9/CMKLR1/CSF1R/CSF3R/CX3CR1/CXCL1/CXCL12/CXCL2/CXCL3/CXCL6/CYP19A1/DPEP1/DPP4/EDN3/EDNRB/EMILIN1/FCER1G/FLT1/GREM1/IL1A/IL1B/IL1R1/IL34/IL6R/ITGA1/ITGA9/ITGB2/LBP/LGALS3/LYN/MCOLN2/MDK/MMP14/MMP2/MMP28/NCKAP1L/NOD2/P2RY12/PECAM1/PF4/PGF/PLA2G7/PPBP/PRTN3/PTGER4/RAC2/RARRES2/RIN3/ROR2/S100A14/SERPINE1/SLIT2/SYK/TGFB2/THBS1/…	74
84	Up	GO:0001657	ureteric bud development	43/2245	99/18888	0.434343	3.65429	9.72496	2.89219e-15	1.97813e-13	1.19768e-13	AGT/AGTR2/BMP2/BMP4/CALB1/CER1/EPCAM/EYA1/FGF8/FMN1/FOXC1/FOXC2/FOXD1/GATA3/GDNF/GPC3/GREM1/HNF1B/HOXA11/HOXB7/HOXD11/HS3ST3A1/KIF26B/LAMA5/LGR4/NPNT/OSR1/PAX2/PAX8/SDC4/SHH/SIM1/SIX1/SIX2/SIX4/SLIT2/SMAD6/TACSTD2/TCF21/WNT1/WNT11/WNT6/WT1	43
85	Up	GO:0060541	respiratory system development	70/2245	220/18888	0.318182	2.67698	9.18891	2.91304e-15	1.97813e-13	1.19768e-13	ACE/ADAMTS2/AGR2/ALDH1A2/ALDH1A3/ANXA2/BMP2/BMP4/CCBE1/CEBPA/CHI3L1/CLDN18/COL3A1/COL6A1/CRISPLD2/CTSH/CTSZ/DPPA4/EPAS1/ESRP2/FGF10/FGF18/FGF8/FOSL2/FOXA1/FOXF1/GATA6/GLI1/GPC3/GRHL2/HHIP/HMGCS2/HOXA5/IGFBP5/ITGB6/KDR/LAMA5/LEF1/LHX3/MME/MMP14/MSC/MSX1/MYOCD/NOS3/PDGFRA/PGR/PHOX2B/PKDCC/PTK7/RARG/RBP4/RCN3/RSPO2/SHH/SIX1/SIX4/SLC23A1/STRA6/TBX2/TBX4/TBX5/TCF21/TGFBR2/THRB/WNT11/WNT2/WNT5A/WT1/YAP1	70
86	Up	GO:1903037	regulation of leukocyte cell-cell adhesion	101/2245	382/18888	0.264398	2.22448	8.87972	3.01463e-15	2.01347e-13	1.21908e-13	ADTRP/AIF1/ALOX5/ANXA1/ARG1/ASCL2/BMP4/CARD11/CAV1/CCL5/CD28/CD300A/CD4/CD44/CD55/CD70/CD74/CD86/CEBPB/CHST4/CXCL12/DOCK8/DPP4/EBI3/EPO/ETS1/FGL1/FGL2/GATA3/GCNT1/GPNMB/HAS2/HFE/HHLA2/HLA-DMB/HLA-DOA/HLA-DPA1/HLA-DQB1/HLA-DQB2/HLA-DRB1/HLA-E/HLA-G/HLX/ICOSLG/IDO1/IGF1/IGF2/IHH/IL18/IL1A/IL1B/IL2RG/IL4R/IL6ST/ITGA4/ITGB2/KLF4/LAPTM5/LCK/LEF1/LGALS1/LGALS3/LILRB2/LRRC32/LYN/MDK/NCKAP1L/NFKBIZ/NOD2/…	101
87	Up	GO:0048839	inner ear development	65/2245	196/18888	0.331633	2.79015	9.25257	3.03485e-15	2.01347e-13	1.21908e-13	ALDH1A3/ATOH1/ATP8B1/BMP2/BMP4/CALB1/CEBPA/CEBPD/CLRN1/COL2A1/CTHRC1/CYTL1/ESRP1/EYA1/FGF10/FGF20/FGF8/FREM2/FRZB/FZD6/GATA2/GATA3/GBX2/GJB2/GJB6/GRHL3/GRXCR1/HEY2/HOXA1/HOXA13/HPN/ITGA8/JAG1/KCNQ1/LGR5/LHX3/LRIG3/MAF/MCOLN3/MSX1/MYO7A/NEUROG1/OTOL1/OTOP1/PAX2/PAX8/PHOX2B/POU4F3/PRRX1/PTK7/ROR1/SDC4/SHH/SIX1/SIX4/SLC44A4/TBX18/TBX2/TBX3/TFAP2A/TGFB2/USH1C/WNT1/WNT3A/WNT5A	65
88	Up	GO:0030195	negative regulation of blood coagulation	29/2245	49/18888	0.591837	4.97934	10.2436	3.24754e-15	2.13009e-13	1.28969e-13	ADAMTS18/ADTRP/ANXA2/APOE/APOH/CD9/CEACAM1/F11/F2/FGA/FGB/FGG/HRG/KNG1/NOS3/PDGFRA/PLAT/PLAU/PLG/PRKG1/PROC/SERPINE1/SERPINF2/SERPING1/TFPI/THBD/THBS1/TSPAN8/VTN	29
89	Up	GO:0002062	chondrocyte differentiation	47/2245	116/18888	0.405172	3.40886	9.55784	3.90865e-15	2.52718e-13	1.53012e-13	ACVRL1/ADAMTS12/BMP2/BMP4/COL27A1/COL2A1/COL3A1/COMP/CREB3L2/CYTL1/EFEMP1/FGF18/FOSL2/GDF6/GREM1/HMGA2/HOXA11/IHH/LOXL2/MAF/MDK/MSX2/NKX3-2/OSR1/OSR2/PKDCC/PRKG2/PTH1R/PTHLH/RARG/RUNX1/RUNX2/RUNX3/SCIN/SERPINH1/SHOX2/SIX2/SLC39A14/SNAI2/SULF1/SULF2/TGFB1/TGFBI/TGFBR2/WNT10B/WNT9A/ZBTB16	47
90	Up	GO:0002274	myeloid leukocyte activation	74/2245	241/18888	0.307054	2.58336	9.08566	3.94052e-15	2.52718e-13	1.53012e-13	AIF1/ANXA1/ANXA3/BATF2/C1QA/CCL3/CCL5/CD177/CD300A/CD33/CD74/CD84/CD93/CEBPA/CTSC/CX3CR1/CXCL6/DNASE1L3/DOCK2/DYSF/ENPP3/F2RL1/FCER1G/FES/FN1/FOXF1/GATA2/GRN/HAVCR1/IL18/IL31RA/IL4R/ITGAM/ITGB2/ITGB6/LBP/LCP2/LRRK2/LTBR/LYN/MILR1/MT1G/NMI/PLA2G2A/PLA2G4A/PLCG2/PLSCR1/PTGDR/PTGDS/PTPN6/PTPRC/PYCARD/RAC2/RHOH/S100A13/SPHK1/SPI1/STXBP2/SUCNR1/SYK/TGFBR2/THBS1/TICAM1/TLR1/TLR2/TLR4/TLR6/TMEM106A/TREM…	74
91	Up	GO:1903039	positive regulation of leukocyte cell-cell adhesion	81/2245	277/18888	0.292419	2.46023	8.99184	4.32258e-15	2.74175e-13	1.66003e-13	AIF1/ALOX5/ANXA1/CARD11/CAV1/CCL5/CD28/CD4/CD44/CD55/CD70/CD74/CD86/CHST4/DOCK8/DPP4/EBI3/EPO/ETS1/GATA3/GCNT1/HAS2/HHLA2/HLA-DMB/HLA-DOA/HLA-DPA1/HLA-DQB1/HLA-DQB2/HLA-DRB1/HLA-E/HLA-G/HLX/ICOSLG/IGF1/IGF2/IHH/IL18/IL1A/IL1B/IL2RG/IL4R/IL6ST/ITGA4/ITGB2/LCK/LEF1/LGALS1/LILRB2/LYN/MDK/NCKAP1L/NFKBIZ/NOD2/PCK1/PIK3R6/PTPN6/PTPRC/PYCARD/RAG1/RHOH/RUNX1/RUNX3/SASH3/SELP/SHH/SMARCD2/SOCS1/SOX13/SPN/S…	81
92	Up	GO:0072163	mesonephric epithelium development	43/2245	100/18888	0.43	3.61775	9.63965	4.49549e-15	2.7901e-13	1.68931e-13	AGT/AGTR2/BMP2/BMP4/CALB1/CER1/EPCAM/EYA1/FGF8/FMN1/FOXC1/FOXC2/FOXD1/GATA3/GDNF/GPC3/GREM1/HNF1B/HOXA11/HOXB7/HOXD11/HS3ST3A1/KIF26B/LAMA5/LGR4/NPNT/OSR1/PAX2/PAX8/SDC4/SHH/SIM1/SIX1/SIX2/SIX4/SLIT2/SMAD6/TACSTD2/TCF21/WNT1/WNT11/WNT6/WT1	43
93	Up	GO:0072164	mesonephric tubule development	43/2245	100/18888	0.43	3.61775	9.63965	4.49549e-15	2.7901e-13	1.68931e-13	AGT/AGTR2/BMP2/BMP4/CALB1/CER1/EPCAM/EYA1/FGF8/FMN1/FOXC1/FOXC2/FOXD1/GATA3/GDNF/GPC3/GREM1/HNF1B/HOXA11/HOXB7/HOXD11/HS3ST3A1/KIF26B/LAMA5/LGR4/NPNT/OSR1/PAX2/PAX8/SDC4/SHH/SIM1/SIX1/SIX2/SIX4/SLIT2/SMAD6/TACSTD2/TCF21/WNT1/WNT11/WNT6/WT1	43
94	Up	GO:0048771	tissue remodeling	63/2245	188/18888	0.335106	2.81937	9.20775	4.63528e-15	2.80394e-13	1.69768e-13	ACE/ACP5/ACVRL1/AGT/AGTR2/CAV1/CEACAM1/CLDN18/COL6A1/CSF1R/CSPG4/CST3/CTHRC1/CYP1A1/DBH/DDR2/EDNRA/ELF3/EPAS1/FGF10/FGF8/FOSL2/FOXC1/FOXC2/GJA1/GPNMB/GREM1/HAND2/HOXA3/HRG/IGFBP5/IHH/IL18/IL1A/IL20RA/JAG1/LEPR/LGR4/MC4R/MDK/MITF/MMP14/MMP2/NOS3/NOX4/NPR3/PLG/PPARG/PTH1R/RAC2/RSPO3/RUNX1/SYK/TCIRG1/TF/TGFB1/TIE1/TMBIM1/TMEM119/TNFAIP3/TNFRSF11A/TNFRSF11B/VDR	63
95	Up	GO:0061045	negative regulation of wound healing	37/2245	77/18888	0.480519	4.04278	9.82618	4.69749e-15	2.80394e-13	1.69768e-13	ADAMTS18/ADTRP/ALOX5/ANXA2/APOE/APOH/CD9/CEACAM1/CLDN19/CLDN3/EPPK1/F11/F2/FGA/FGB/FGG/FIGNL2/HRG/KNG1/MYOZ1/NOS3/PDGFRA/PHLDB2/PLAT/PLAU/PLG/PRKG1/PROC/SERPINE1/SERPINF2/SERPING1/TFPI/THBD/THBS1/TSPAN8/VTN/WFDC1	37
96	Up	GO:0072078	nephron tubule morphogenesis	37/2245	77/18888	0.480519	4.04278	9.82618	4.69749e-15	2.80394e-13	1.69768e-13	AGT/AGTR2/BMP2/BMP4/EYA1/FGF8/FMN1/FOXD1/GATA3/GDNF/GPC3/GREM1/HNF1B/HOXA11/HOXB7/HOXD11/HS3ST3A1/IRX1/IRX2/IRX3/KIF26B/LAMA5/LGR4/NPNT/OSR1/PAX2/PAX8/SHH/SIX1/SIX2/SIX4/TACSTD2/TCF21/WNT1/WNT11/WNT6/WT1	37
97	Up	GO:0001503	ossification	112/2245	446/18888	0.251121	2.11277	8.73462	4.71209e-15	2.80394e-13	1.69768e-13	ACTN3/ADAMTS12/AHSG/ALOX15/ALOX5/AREG/BAMBI/BMP1/BMP2/BMP4/BMP5/CCL3/CCR1/CDH11/CEBPA/CEBPB/CEBPD/CER1/COL13A1/COL1A1/COL1A2/COL2A1/COL5A2/COL6A1/COMP/CREB3L1/CTHRC1/DDR2/DHH/DKK1/EGR2/ENPP1/FBN2/FGF18/FGF23/FHL2/FOSL2/FOXC1/FOXC2/GDF10/GJA1/GLI1/GPC3/GREM1/HAND2/HGF/HOXA2/ID3/IFITM1/IGF1/IGF2/IGFBP3/IGFBP5/IGSF10/IHH/IL6R/IL6ST/ISG15/ITGA11/JAG1/KAZALD1/KREMEN2/LEF1/LGR4/MDK/MGP/MMP14/MMP2/MSX2/…	112
98	Up	GO:0022612	gland morphogenesis	49/2245	125/18888	0.392	3.29804	9.46749	4.86383e-15	2.8647e-13	1.73447e-13	AREG/BMP4/CAV1/CEACAM1/CEBPB/CRIP1/CSF1R/EDAR/ELF3/ESRP2/FGF10/FGF8/FGL1/FOXA1/GDF7/GLI1/HGF/HOXA13/HOXD13/HPN/IGFBP5/LAMA5/LIMS2/MDK/MMP2/MSX2/NKX2-3/NKX3-1/NRP1/PGR/RARG/SHH/SNAI2/SOSTDC1/STAT6/SULF1/SULF2/TBX2/TBX3/TGFB1/TGFB2/TGFBR2/TGM2/TNFAIP3/TP63/VDR/WNT3A/WNT5A/XBP1	49
99	Up	GO:0050819	negative regulation of coagulation	30/2245	53/18888	0.566038	4.76228	10.0735	5.85e-15	3.41072e-13	2.06507e-13	ADAMTS18/ADTRP/ANXA2/APOE/APOH/CD9/CEACAM1/F11/F2/FGA/FGB/FGG/HRG/KNG1/NOS3/PDGFRA/PLAT/PLAU/PLG/PRKG1/PROC/PROCR/SERPINE1/SERPINF2/SERPING1/TFPI/THBD/THBS1/TSPAN8/VTN	30
100	Up	GO:0045216	cell-cell junction organization	68/2245	213/18888	0.319249	2.68596	9.08824	6.01909e-15	3.47422e-13	2.10351e-13	ACE/ACVRL1/AGT/APLNR/CAV1/CD177/CD9/CDH1/CDH11/CDH15/CDH17/CDH19/CDH3/CDH5/CDH6/CLDN1/CLDN11/CLDN14/CLDN18/CLDN19/CLDN23/CLDN3/CLDN4/CLDN5/CLDN6/CLDN7/CLDN9/CSF1R/DSG2/DSP/F11R/F2RL1/FRMPD2/GJA1/GJA5/GJB1/GJB2/GJB6/GPBAR1/GRHL2/IL1B/ILDR1/IRX3/LIM2/LIMS2/LSR/MARVELD2/MARVELD3/NPHS1/NR1H4/OCLN/PECAM1/PERP/PKHD1/PKP2/PKP3/POF1B/PRTN3/SNAI1/SNAI2/SVEP1/TBX5/TGFB1/TGFB2/TJP3/TLN1/TRPV4/WNT11	68
101	Up	GO:0002685	regulation of leukocyte migration	71/2245	230/18888	0.308696	2.59717	8.95068	1.05095e-14	5.99221e-13	3.62807e-13	ADTRP/AIF1/ANXA1/ASCL2/BDKRB1/BMP5/C3AR1/CCL3/CCL5/CCR1/CD300A/CD74/CD9/CHST4/CMKLR1/CSF1R/CX3CR1/CXCL12/CYP19A1/DOCK8/DPP4/EDN3/EMILIN1/F2RL1/F7/GCNT1/GCSAM/GPSM3/GREM1/HMOX1/HOXA7/ICAM1/IL1A/IL1R1/IL34/IL6R/ITGA4/LBP/LGALS3/LYN/LYVE1/MDK/MMP14/MMP28/NCKAP1L/NOD2/P2RY12/PADI2/PGF/PLA2G7/PLVAP/PRSS56/PTGER4/PYCARD/RAC2/RARRES2/RIN3/RIPK3/S100A14/SELP/SERPINE1/SLIT2/SPN/THBS1/TNFAIP6/TNFRSF18/TREM…	71
102	Up	GO:0043588	skin development	88/2245	318/18888	0.27673	2.32823	8.77311	1.05891e-14	5.99221e-13	3.62807e-13	ADAMTS2/ALOX15B/ALX4/ANXA1/APCDD1/AQP3/ASCL4/CDH3/CLDN1/CLDN4/CNFN/COL1A1/COL1A2/COL3A1/COL5A1/COL5A2/COL5A3/COL6A1/COMP/DACT2/DKK1/DLX3/DSG4/DSP/EDAR/EREG/ETV4/FA2H/FERMT1/FGF10/FLG/FLNB/FOSL2/FOXC1/FOXI3/FOXQ1/FRAS1/FST/FZD6/GAL/GATA6/GRHL2/GRHL3/HOXA7/HPSE/IGFBP5/IL18/IL1A/IRF6/ITGB4/ITGB6/JAG1/KLF4/KRT16/KRT3/KRT7/LAMA5/LGR4/LGR5/LSR/LTB/MET/MSX2/NFKBIZ/NGFR/OPN3/OVOL1/OVOL2/POU2F3/PPL/SFN/SH…	88
103	Up	GO:0060993	kidney morphogenesis	42/2245	98/18888	0.428571	3.60573	9.49844	1.07652e-14	6.03271e-13	3.65259e-13	AGT/AGTR2/BMP2/BMP4/CALB1/EYA1/FGF10/FGF8/FMN1/FOXD1/FRAS1/GATA3/GCNT1/GDNF/GPC3/GREM1/HNF1B/HOXA11/HOXB7/HOXD11/HS3ST3A1/IRX1/IRX2/IRX3/KIF26B/LAMA5/LGR4/LRRK2/NPNT/OSR1/PAX2/PAX8/SHH/SIX1/SIX2/SIX4/TACSTD2/TCF21/WNT1/WNT11/WNT6/WT1	42
104	Up	GO:0072088	nephron epithelium morphogenesis	37/2245	79/18888	0.468354	3.94044	9.6187	1.3201e-14	7.32654e-13	4.43595e-13	AGT/AGTR2/BMP2/BMP4/EYA1/FGF8/FMN1/FOXD1/GATA3/GDNF/GPC3/GREM1/HNF1B/HOXA11/HOXB7/HOXD11/HS3ST3A1/IRX1/IRX2/IRX3/KIF26B/LAMA5/LGR4/NPNT/OSR1/PAX2/PAX8/SHH/SIX1/SIX2/SIX4/TACSTD2/TCF21/WNT1/WNT11/WNT6/WT1	37
105	Up	GO:0072171	mesonephric tubule morphogenesis	34/2245	68/18888	0.5	4.20668	9.72914	1.33365e-14	7.33126e-13	4.43881e-13	AGT/AGTR2/BMP2/BMP4/EYA1/FGF8/FMN1/FOXD1/GATA3/GDNF/GPC3/GREM1/HNF1B/HOXA11/HOXB7/HOXD11/HS3ST3A1/KIF26B/LAMA5/LGR4/NPNT/OSR1/PAX2/PAX8/SHH/SIX1/SIX2/SIX4/TACSTD2/TCF21/WNT1/WNT11/WNT6/WT1	34
106	Up	GO:0072132	mesenchyme morphogenesis	31/2245	58/18888	0.534483	4.4968	9.79565	1.78319e-14	9.70998e-13	5.87904e-13	ACTA2/ACTC1/ACTG2/ACVRL1/APLNR/BMP2/BMP5/FGF8/FOXC1/FOXC2/FOXF1/GATA5/HEY2/HEYL/LEF1/MSX1/MSX2/NOS3/OSR1/SNAI1/SNAI2/TBX2/TBX20/TBX3/TGFB2/TGFBR2/TMEM100/TWIST1/WNT11/WNT3A/WNT5A	31
107	Up	GO:0007162	negative regulation of cell adhesion	86/2245	310/18888	0.277419	2.33403	8.69803	1.82151e-14	9.82594e-13	5.94925e-13	ACVRL1/ADAMTS18/ADTRP/ANGPT1/ANGPT2/ANXA1/APOA1/ARG1/ARHGAP6/ASCL2/B4GALNT2/BMP2/BMP4/CD164/CD300A/CD74/CD86/CD9/CDH1/CEACAM1/CEBPB/CLDN7/COL1A1/CXCL12/CYP1B1/DACT2/DLC1/EPCAM/ERBB3/FGL1/FGL2/FXYD5/FZD4/GPNMB/HFE/HLA-DRB1/HLA-E/HLA-G/HLX/HOXA7/HRG/HSPG2/IDO1/IHH/IL4R/JAG1/KLF4/KNG1/LAPTM5/LGALS3/LILRB2/LRRC32/MDK/MMP14/MMP2/MYADM/PHLDB2/PLA2G2A/PLA2G5/PLG/PODXL/POSTN/PRKG1/PTPN6/PTPRC/RGCC/RUNX1/…	86
108	Up	GO:0048738	cardiac muscle tissue development	74/2245	248/18888	0.298387	2.51044	8.79387	2.08947e-14	1.1167e-12	6.76124e-13	ACTC1/ADAMTS9/ALDH1A2/ALPK2/ALPK3/ANKRD1/ASB2/BMP10/BMP2/BMP4/BMP5/COL14A1/DKK1/DSG2/DSP/EDNRA/ERBB3/FES/FGF20/FGF8/FHL2/FOXC1/FOXC2/FOXH1/GATA4/GATA5/GATA6/GJA1/GJA5/GJB6/GLI1/GREM1/HAND1/HEY2/ID2/IGF1/IRX3/JPH2/MSC/MSX1/MSX2/MYL3/MYL7/MYLK3/MYOCD/NOX4/NPPB/NRAP/PDGFRA/PKP2/POU4F1/PPP1R13L/PRKG1/RBP4/RGS4/RUNX1/SHOX2/TBX18/TBX2/TBX20/TBX3/TBX5/TGFB1/TGFB2/TGFBR3/TNNC1/TNNI1/TNNT2/TPM1/WNT2/WNT3A…	74
109	Up	GO:0007043	cell-cell junction assembly	55/2245	156/18888	0.352564	2.96625	9.05697	2.21856e-14	1.17482e-12	7.11309e-13	ACE/ACVRL1/AGT/APLNR/CAV1/CD9/CDH1/CDH11/CDH15/CDH17/CDH19/CDH3/CDH5/CDH6/CLDN1/CLDN11/CLDN14/CLDN18/CLDN19/CLDN23/CLDN3/CLDN4/CLDN5/CLDN6/CLDN7/CLDN9/F11R/FRMPD2/GJA1/GJA5/GJB1/GJB2/GJB6/GPBAR1/GRHL2/IL1B/ILDR1/IRX3/LIM2/LSR/MARVELD2/MARVELD3/NPHS1/NR1H4/OCLN/PECAM1/PKP2/PKP3/POF1B/SNAI1/SNAI2/TBX5/TLN1/TRPV4/WNT11	55
110	Up	GO:0042692	muscle cell differentiation	107/2245	428/18888	0.25	2.10334	8.47988	2.67512e-14	1.40371e-12	8.49896e-13	ACTC1/ACTN3/ADAM12/ADAMTS15/ADM/ALPK2/ALPK3/ANKRD1/APLNR/ASB2/AVPR1A/B4GALNT2/BARX2/BMP10/BMP2/BMP4/CAPN3/CAV2/CD53/CD9/CEACAM5/COL14A1/COL6A1/COMP/DKK1/DOCK2/EDNRA/EDNRB/EHD2/EREG/ERVW-1/FGF10/FHL2/FLNC/FOXF1/GATA4/GATA6/GDF15/GPER1/GREM1/HEY2/ID2/IGF1/IGF2/IGFBP5/IL4R/IRX3/ITGA8/KLF5/KLHL40/KRT19/KRT8/LAMA2/LAMB1/LAMC1/LBX2/LDB3/LMOD1/LMOD3/MMP14/MSX1/MYBPC1/MYL9/MYLK3/MYOCD/MYOM3/MYOZ1/NFATC1/…	107
111	Up	GO:0002696	positive regulation of leukocyte activation	95/2245	362/18888	0.262431	2.20793	8.52271	3.33167e-14	1.73247e-12	1.04895e-12	AIF1/ANXA1/CARD11/CAV1/CCL3/CCL5/CD28/CD4/CD55/CD70/CD74/CD86/CEBPA/CLEC7A/CTSC/DOCK8/DPP4/EBI3/EPO/FGF10/GATA3/HAVCR1/HHLA2/HLA-DMB/HLA-DOA/HLA-DPA1/HLA-DQB1/HLA-DQB2/HLA-DRB1/HLA-E/HLA-G/HLX/ICOSLG/IGF1/IGF2/IHH/IL18/IL1A/IL1B/IL2RG/IL4R/IL6ST/LBP/LCK/LEF1/LGALS1/LILRB2/LRRK2/LYN/MDK/MMP14/NCKAP1L/NFATC2/NFKBIZ/NOD2/PCK1/PIK3R6/PLA2G4A/PTPN6/PTPRC/PYCARD/RAG1/RHOH/RUNX1/RUNX3/SASH3/SHH/SMARCD2/…	95
112	Up	GO:0042445	hormone metabolic process	72/2245	240/18888	0.3	2.52401	8.72672	3.47103e-14	1.78882e-12	1.08307e-12	ACE/ADH4/ADM/AFP/AKR1B10/AKR1B15/AKR1D1/ALDH1A1/ALDH1A2/ALDH1A3/BACE2/BMP2/BMP5/CGA/CHST9/CPQ/CRABP2/CTSZ/CYP11A1/CYP19A1/CYP1A1/CYP1B1/CYP26A1/CYP26C1/CYP2C9/CYP2S1/CYP2W1/DAB2/DGAT2/DIO1/DPP4/DUOX2/DUOXA1/DUOXA2/ECE1/EDNRB/ENPEP/FOXA1/GAL/GATA3/GHR/HFE/HPN/HSD17B2/HSD17B3/IYD/KLK6/LRAT/MEP1A/MME/NR5A1/PAPSS2/PAX8/PCSK5/PCSK6/PDGFRA/PLA2G7/PNPLA4/RBP4/REN/SCPEP1/SDR16C5/SHH/SLC26A7/STC2/SULT1A1/…	72
113	Up	GO:0072028	nephron morphogenesis	37/2245	81/18888	0.45679	3.84314	9.41792	3.55079e-14	1.81373e-12	1.09815e-12	AGT/AGTR2/BMP2/BMP4/EYA1/FGF8/FMN1/FOXD1/GATA3/GDNF/GPC3/GREM1/HNF1B/HOXA11/HOXB7/HOXD11/HS3ST3A1/IRX1/IRX2/IRX3/KIF26B/LAMA5/LGR4/NPNT/OSR1/PAX2/PAX8/SHH/SIX1/SIX2/SIX4/TACSTD2/TCF21/WNT1/WNT11/WNT6/WT1	37
114	Up	GO:0042475	odontogenesis of dentin-containing tooth	40/2245	93/18888	0.430108	3.61865	9.29762	3.99162e-14	2.02102e-12	1.22366e-12	ADM/APCDD1/BMP2/BMP4/CFTR/CSF3R/DLX3/EDAR/FAM20A/FGF10/FGF4/FGF8/FOXC1/FOXI3/FST/GATA6/HAND1/HAND2/ITGB6/LAMA5/LEF1/MSX1/MSX2/NGFR/NKX2-3/ODAM/PDGFRA/PERP/RSPO2/RUNX2/SCN10A/SERPINE1/SHH/SOSTDC1/TCIRG1/TNFRSF11B/TP63/WDR72/WNT10A/WNT6	40
115	Up	GO:0070663	regulation of leukocyte proliferation	77/2245	267/18888	0.28839	2.42633	8.62078	4.63911e-14	2.32843e-12	1.40978e-12	AHR/AIF1/ANXA1/ARG1/BMP4/BST2/CARD11/CCL5/CD28/CD300A/CD55/CD70/CD74/CD86/CEBPB/CLC/CSF1R/CSF2RB/EBI3/ENPP3/EPO/FGF10/GAL/GPNMB/GREM1/HHEX/HHLA2/HLA-DMB/HLA-DPA1/HLA-DRB1/HLA-E/HLA-G/ICOSLG/IDO1/IGF1/IGF2/IHH/IL18/IL1A/IL1B/IL34/IL6ST/LGALS3/LILRB2/LRRC32/LYN/MNDA/NCKAP1L/NFATC2/PLA2G2A/PLA2G5/PTPN6/PTPRC/PYCARD/RAC2/RIPK3/SASH3/SDC4/SHH/SPN/SPTA1/STAT6/SYK/TGFBR2/TICAM1/TLR4/TNFAIP3/TNFRSF1B/TNF…	77
116	Up	GO:0042471	ear morphogenesis	48/2245	127/18888	0.377953	3.17985	9.05264	4.79752e-14	2.38718e-12	1.44535e-12	ALDH1A3/ATOH1/CLRN1/COL2A1/CTHRC1/EDNRA/EYA1/FGF10/FGF8/FRZB/FZD6/GATA2/GATA3/GBX2/GJB6/GRHL3/GSC/HOXA1/HOXA2/HPN/ITGA8/KCNQ1/LRIG3/MSX1/MYO7A/NEUROG1/NKX3-2/OSR1/OSR2/OTOP1/PAX2/PAX8/POU4F3/PRRX1/PTK7/SIX1/SIX2/SIX4/SLC44A4/TBX18/TBX2/TBX3/TFAP2A/TWIST1/USH1C/WNT1/WNT3A/WNT5A	48
117	Up	GO:0060675	ureteric bud morphogenesis	33/2245	67/18888	0.492537	4.1439	9.46799	5.69845e-14	2.81123e-12	1.7021e-12	AGT/AGTR2/BMP2/BMP4/EYA1/FGF8/FMN1/FOXD1/GATA3/GDNF/GPC3/GREM1/HNF1B/HOXA11/HOXB7/HOXD11/HS3ST3A1/KIF26B/LAMA5/LGR4/NPNT/PAX2/PAX8/SHH/SIX1/SIX2/SIX4/TACSTD2/TCF21/WNT1/WNT11/WNT6/WT1	33
118	Up	GO:0032102	negative regulation of response to external stimulus	111/2245	456/18888	0.243421	2.04799	8.32007	6.07594e-14	2.97206e-12	1.79948e-12	A2M/ACP5/ADAMTS18/ADTRP/AHR/AIF1/ALOX5/ANGPT2/ANXA2/APOA1/APOE/APOH/ARG1/CARD16/CD9/CDH5/CEACAM1/CLDN19/CLDN3/CYP19A1/DHX58/DPP4/ELF4/ENPP3/EPPK1/F11/F2/FGA/FGB/FGG/FGL2/FIGNL2/FOXF1/GATA3/GPER1/GPR17/GREM1/GRN/HCK/HGF/HLA-DRB1/HLA-E/HLA-G/HRG/IFI16/IGF1/IL22RA1/ISG15/KLF4/KNG1/LYN/MDK/MICB/MMP28/MYOZ1/NLRC5/NLRP12/NMI/NOD2/NOS3/NR1H4/NRP1/NT5E/OAS1/OAS3/OTOP1/PADI2/PDGFRA/PHLDB2/PLAT/PLAU/PLG/PP…	111
119	Up	GO:0043410	positive regulation of MAPK cascade	114/2245	475/18888	0.24	2.01921	8.26268	7.78113e-14	3.77418e-12	2.28513e-12	ACKR3/ACTA2/ADCYAP1/ADRA2B/ADRB3/ALOX15/ANGPT1/APELA/APOE/ARHGEF5/BCAR3/BIRC7/BMP2/BMP4/CAV2/CCL3/CCL3L3/CCL5/CCR1/CD36/CD4/CD40/CD44/CD74/CHI3L1/CSF1R/CSPG4/DKK1/EDAR/EDN3/EPO/F2RL1/FGA/FGB/FGF10/FGF18/FGF20/FGF23/FGF4/FGF8/FGG/FLT1/FSHR/FZD10/GCG/GDF15/GDF6/GH1/GHR/GPBAR1/GPER1/GPNMB/HAND2/HGF/HLA-DRB1/ICAM1/IGF1/IGF2/IGFBP3/IGFBP4/IGFBP6/IL11/IL1A/IL1B/IL34/ITGA1/KDR/KLB/LAPTM5/LPAR1/LPAR3/LRR…	114
120	Up	GO:0031214	biomineral tissue development	59/2245	180/18888	0.327778	2.75771	8.70251	1.02627e-13	4.93637e-12	2.98879e-12	ACTN3/AHSG/ALOX15/ALOX5/BMP2/BMP4/CCL3/CCR1/CEBPB/CER1/CFTR/COL1A1/COL1A2/COL6A1/COMP/DDR2/ENPP1/FAM20A/FAM83H/FBN2/FGF23/FOSL2/GJA1/GPC3/GREM1/HEY2/IGF1/ISG15/ITGB6/LGR4/MGP/MSX2/NOS3/NOTUM/ODAM/OSR1/OSR2/OTOL1/OTOP1/PHOSPHO1/PKDCC/PTH1R/PTHLH/ROR2/RSPO2/RUNX2/SGMS2/SRGN/TCIRG1/TFAP2A/TGFB1/TMEM119/TWIST1/VDR/WDR72/WLS/WNT10B/WNT11/WNT6	59
121	Up	GO:0050727	regulation of inflammatory response	105/2245	425/18888	0.247059	2.0786	8.25992	1.06448e-13	5.07781e-12	3.07443e-12	ACP5/ADAMTS12/AGT/AGTR1/AHR/AHSG/ALOX15/ALOX5/ALOX5AP/ANXA1/APOA1/APOE/BIRC3/C3/CARD16/CASP4/CCL3/CCL5/CD28/CDH5/CEBPA/CEBPB/CREB3L3/CTSC/CYP19A1/DNASE1L3/DUOXA1/DUOXA2/EDNRB/ELF4/ENPP3/ETS1/FOXF1/GATA3/GPER1/GPR17/GPSM3/GRN/GSDMD/HCK/HGF/HLA-DRB1/HLA-E/IDO1/IGF1/IL18/IL1B/IL1R1/IL22RA1/IL6ST/KLF4/LBP/LGALS1/LGALS2/LRRC19/LRRK2/LYN/MDK/MGST2/NFKBIZ/NLRP1/NLRP12/NLRP7/NMI/NOD2/NR1H4/NT5E/NUPR1/OSM…	105
122	Up	GO:0070661	leukocyte proliferation	92/2245	352/18888	0.261364	2.19895	8.33945	1.10241e-13	5.21568e-12	3.15791e-12	ACE/AHR/AIF1/ANXA1/ARG1/BMP4/BST2/CARD11/CCL5/CD180/CD28/CD300A/CD40/CD55/CD70/CD74/CD86/CEBPB/CLC/CSF1R/CSF2RB/DOCK2/DOCK8/EBI3/ELF4/ENPP3/EPO/F2RL1/FGF10/FOSL2/GAL/GJA1/GPNMB/GREM1/HHEX/HHLA2/HLA-DMB/HLA-DPA1/HLA-DRB1/HLA-E/HLA-G/ICOSLG/IDO1/IGF1/IGF2/IHH/IL18/IL1A/IL1B/IL34/IL6ST/LEF1/LGALS3/LILRB2/LRRC32/LYN/MNDA/NCKAP1L/NFATC2/NFKBIZ/NPR3/PLA2G2A/PLA2G5/PTPN6/PTPRC/PYCARD/RAC2/RIPK3/SASH3/SD…	92
123	Up	GO:0007369	gastrulation	63/2245	200/18888	0.315	2.65021	8.61681	1.18778e-13	5.5739e-12	3.37479e-12	APELA/APLNR/APOA1/BMP4/CER1/CFC1/COL12A1/COL5A1/COL5A2/COL6A1/DKK1/ETS2/EYA1/EYA2/FGF8/FN1/FOXA2/FOXC1/FOXC2/FOXF1/GATA6/GDF3/GJA1/GPC3/GSC/HAND1/HMGA2/HNF1B/HNF4A/HOXA11/ITGA4/ITGA5/ITGA8/ITGB2/ITGB4/ITGB5/KLF4/LAMB1/LAMB3/LBX2/LEF1/MIXL1/MMP14/MMP2/MYADM/NANOG/OSR1/PAX2/PHLDB2/POU5F1/SIX2/SNAI1/SOX17/TAL1/TBX20/TGFBR2/TLX2/VTN/WLS/WNT11/WNT3A/WNT5A/WNT8B	63
124	Up	GO:0002064	epithelial cell development	66/2245	216/18888	0.305556	2.57075	8.52732	1.55617e-13	7.24374e-12	4.38582e-12	ACTA2/ADAMTSL4/B4GALT1/BMP4/BMP5/CDH5/CEBPA/CLDN1/CLDN3/CLDN5/COL18A1/COL27A1/DACT2/EDNRA/EDNRB/EPAS1/F11R/F2RL1/FLNB/FOSL2/FOXA1/FOXC2/FRMD6/FRZB/GATA2/GJA1/GRHL2/HOXA13/HOXA5/HPSE/ICAM1/IHH/IL1A/IL1B/IL6ST/JAG1/KDR/KLF5/MARVELD2/MET/MYADM/NKX3-2/NKX6-1/NPHS1/NTRK1/ONECUT1/PECAM1/PGR/PKHD1/PODXL/POF1B/PRDM1/PROC/RAB25/RARG/ROBO4/ROS1/SFN/SOX18/ST14/STC1/TFCP2L1/TJP3/TP63/WNT5A/YAP1	66
125	Up	GO:0090596	sensory organ morphogenesis	78/2245	278/18888	0.280576	2.36058	8.3936	1.57542e-13	7.27466e-12	4.40454e-12	ALDH1A3/AQP1/ATOH1/BCAR3/BMP4/CALB1/CLRN1/COL2A1/COL5A1/COL5A2/COL8A2/CTHRC1/EDNRA/EFEMP1/EYA1/FBN1/FBN2/FGF10/FGF8/FOXF2/FRZB/FZD6/GATA2/GATA3/GBX2/GJB6/GNGT1/GRHL3/GSC/HOXA1/HOXA2/HPN/IHH/ITGA8/JAG1/KCNQ1/KDR/LRIG3/MFAP2/MSX1/MYO7A/NEUROG1/NKD1/NKX3-2/OSR1/OSR2/OTOP1/PAX2/PAX8/PITX2/PITX3/POU4F3/PRDM1/PRRX1/PTK7/RARG/RBP4/SAMD11/SIX1/SIX2/SIX4/SLC44A4/STRA6/TBX18/TBX2/TBX3/TFAP2A/TFAP2B/THRB/TM…	78
126	Up	GO:0090130	tissue migration	97/2245	383/18888	0.253264	2.1308	8.21135	1.89101e-13	8.66264e-12	5.24491e-12	ACTA2/ACTC1/ACTG2/ACVRL1/ADAMTS9/ADTRP/AGT/AGTR2/ANGPT1/ANGPT2/ANGPT4/ANXA1/ANXA3/APELA/APOA1/APOE/APOH/BMP10/CARD10/CCBE1/CD40/CDH5/CEACAM1/CLEC14A/CTSH/CYP1B1/DAAM2/DCN/DPP4/ENPP2/EPHB4/EPPK1/ETS1/FERMT1/FGF10/FGF18/FGF4/FGF8/FGFBP1/FOXC2/FOXF1/GATA2/GATA3/GDF6/GREM1/GRHL2/GRN/HAS2/HMOX1/HRG/ID1/KANK2/KDR/KLF4/KRT16/LOXL2/LRG1/MARVELD3/MEOX2/MET/NOS3/NR2F2/NRP1/PLCG2/PLG/PPARG/PRSS3/RAB25/RGCC/…	97
127	Up	GO:0030323	respiratory tube development	62/2245	197/18888	0.314721	2.64786	8.53908	1.94272e-13	8.82943e-12	5.3459e-12	ACE/ADAMTS2/AGR2/ALDH1A2/ANXA2/BMP2/BMP4/CCBE1/CEBPA/CHI3L1/CLDN18/COL3A1/COL6A1/CRISPLD2/CTSH/CTSZ/DPPA4/EPAS1/ESRP2/FGF10/FGF18/FGF8/FOSL2/FOXA1/FOXF1/GATA6/GLI1/GPC3/GRHL2/HHIP/HMGCS2/HOXA5/IGFBP5/ITGB6/KDR/LAMA5/LHX3/MME/MMP14/MYOCD/NOS3/PCSK5/PDGFRA/PGR/PKDCC/PTK7/RBP4/RCN3/RSPO2/SHH/SLC23A1/STRA6/TBX2/TBX4/TBX5/TCF21/TGFBR2/THRB/WNT11/WNT2/WNT5A/YAP1	62
128	Up	GO:0048844	artery morphogenesis	36/2245	81/18888	0.444444	3.73927	9.07385	2.21391e-13	9.98334e-12	6.04455e-12	ACVRL1/ADAMTS9/ANGPTL3/APOB/APOE/BMP4/COL3A1/COMP/EDNRA/EYA1/FGF8/FKBP10/FOLR1/FOXC1/FOXC2/FOXF1/FOXH1/GJA5/HAND2/HEY2/HOXA1/HOXA13/JAG1/MDK/MYLK/MYOCD/NRP1/PRDM1/PRRX1/SIX1/STRA6/TBX2/TFAP2B/TGFB2/TGFBR2/WNT11	36
129	Up	GO:0048608	reproductive structure development	83/2245	307/18888	0.270358	2.27462	8.26971	2.4548e-13	1.09176e-11	6.61019e-12	A2M/ACE/ADAMTS1/AFP/ALOX15B/AMHR2/BMP4/BMP5/C3/CDKN1C/CEBPB/CGA/COL6A1/CRIP1/CYP19A1/CYP1B1/DHH/DMC1/EREG/FGF10/FGF8/FOXA1/FOXC1/FOXF2/FSHR/FST/FZD4/GAS2/GATA3/GATA4/GATA6/GDF7/GJA1/GLI1/HOXA10/HOXA11/HOXA13/HOXA9/HOXD13/HSD17B3/IL1A/IRX5/KDR/LGR4/LHX9/MMP14/MMP2/MYOCD/NEUROG1/NHLH2/NKX3-1/NOS3/NR2F2/NR5A1/NTRK1/NUPR1/OSR1/PDGFRA/PGR/PSAPL1/RARG/RBP4/REN/ROR2/RXFP2/SERPINA5/SERPINF1/SHH/SIX4/SLIT…	83
130	Up	GO:0030324	lung development	61/2245	193/18888	0.316062	2.65915	8.50892	2.45891e-13	1.09176e-11	6.61019e-12	ACE/ADAMTS2/AGR2/ALDH1A2/ANXA2/BMP2/BMP4/CCBE1/CEBPA/CHI3L1/CLDN18/COL3A1/COL6A1/CRISPLD2/CTSH/CTSZ/DPPA4/EPAS1/ESRP2/FGF10/FGF18/FGF8/FOSL2/FOXA1/FOXF1/GATA6/GLI1/GPC3/GRHL2/HHIP/HMGCS2/HOXA5/IGFBP5/ITGB6/KDR/LAMA5/LHX3/MME/MMP14/MYOCD/NOS3/PDGFRA/PGR/PKDCC/PTK7/RBP4/RCN3/RSPO2/SHH/SLC23A1/STRA6/TBX2/TBX4/TBX5/TCF21/TGFBR2/THRB/WNT11/WNT2/WNT5A/YAP1	61
131	Up	GO:0003018	vascular process in circulatory system	77/2245	275/18888	0.28	2.35574	8.31781	2.5342e-13	1.1166e-11	6.76058e-12	ABCC2/ABCC3/ABCG2/ACE/ACTA2/ADM/ADRA1D/ADRA2B/ADRB3/AGT/AGTR1/AGTR2/ANGPT1/APOE/ARHGAP42/ATP2A3/AVP/AVPR1A/BDKRB2/CAV1/CD36/CDH5/CEACAM1/CLDN5/COMP/CPS1/DBH/ECE1/EDN3/EDNRA/EDNRB/F2RL1/FGA/FGB/FGG/FOXC1/FOXC2/GCH1/GJA5/GPER1/HTR1A/ITGA1/ITGA4/ITGA9/KNG1/LEPR/MMP2/MTNR1B/MYLK3/NOS3/NPPB/OCLN/P2RX1/P2RY2/PLVAP/PRKG1/SCPEP1/SERPINF2/SLC16A12/SLC1A5/SLC22A3/SLC2A1/SLC2A3/SLC2A4/SLC38A5/SLC6A20/SLC7A2…	77
132	Up	GO:0048546	digestive tract morphogenesis	27/2245	49/18888	0.55102	4.63593	9.35964	3.26352e-13	1.42705e-11	8.64027e-12	AGR2/EPHB3/FGF10/FOXF1/GATA4/GLI1/HLX/HNF1B/HOXA13/HOXD13/ID2/IHH/NKX2-3/OVOL2/PDGFRA/RBPMS2/SFRP5/SHH/SHOX2/SIX2/SOX10/SOX17/STRA6/TCF21/TP63/WNT11/WNT5A	27
133	Up	GO:0050863	regulation of T cell activation	96/2245	382/18888	0.251309	2.11435	8.08113	4.15114e-13	1.80153e-11	1.09076e-11	AIF1/ANXA1/ARG1/ASCL2/BMP4/CARD11/CAV1/CCL5/CD28/CD300A/CD4/CD55/CD70/CD74/CD86/CEBPB/CLC/DOCK8/DPP4/EBI3/EPO/FGL1/FGL2/GATA3/GPNMB/HFE/HHLA2/HLA-DMB/HLA-DOA/HLA-DPA1/HLA-DQB1/HLA-DQB2/HLA-DRB1/HLA-E/HLA-G/HLX/ICOSLG/IDO1/IGF1/IGF2/IHH/IL18/IL1A/IL1B/IL2RG/IL4R/IL6ST/LAPTM5/LCK/LEF1/LGALS1/LGALS3/LILRB2/LRRC32/LYN/MDK/NCKAP1L/NFKBIZ/NOD2/PCK1/PIK3R6/PLA2G2A/PLA2G5/PRDM1/PTPN6/PTPRC/PYCARD/RAC2/RA…	96
134	Up	GO:0061458	reproductive system development	83/2245	311/18888	0.266881	2.24537	8.13324	5.26817e-13	2.26924e-11	1.37395e-11	A2M/ACE/ADAMTS1/AFP/ALOX15B/AMHR2/BMP4/BMP5/C3/CDKN1C/CEBPB/CGA/COL6A1/CRIP1/CYP19A1/CYP1B1/DHH/DMC1/EREG/FGF10/FGF8/FOXA1/FOXC1/FOXF2/FSHR/FST/FZD4/GAS2/GATA3/GATA4/GATA6/GDF7/GJA1/GLI1/HOXA10/HOXA11/HOXA13/HOXA9/HOXD13/HSD17B3/IL1A/IRX5/KDR/LGR4/LHX9/MMP14/MMP2/MYOCD/NEUROG1/NHLH2/NKX3-1/NOS3/NR2F2/NR5A1/NTRK1/NUPR1/OSR1/PDGFRA/PGR/PSAPL1/RARG/RBP4/REN/ROR2/RXFP2/SERPINA5/SERPINF1/SHH/SIX4/SLIT…	83
135	Up	GO:0050870	positive regulation of T cell activation	72/2245	253/18888	0.284585	2.39432	8.20032	6.3338e-13	2.70805e-11	1.63963e-11	AIF1/ANXA1/CARD11/CAV1/CCL5/CD28/CD4/CD55/CD70/CD74/CD86/DOCK8/DPP4/EBI3/EPO/GATA3/HHLA2/HLA-DMB/HLA-DOA/HLA-DPA1/HLA-DQB1/HLA-DQB2/HLA-DRB1/HLA-E/HLA-G/HLX/ICOSLG/IGF1/IGF2/IHH/IL18/IL1A/IL1B/IL2RG/IL4R/IL6ST/LCK/LEF1/LGALS1/LILRB2/LYN/MDK/NCKAP1L/NFKBIZ/NOD2/PCK1/PIK3R6/PTPN6/PTPRC/PYCARD/RAG1/RHOH/RUNX1/RUNX3/SASH3/SHH/SMARCD2/SOCS1/SOX13/SPN/SPTA1/SYK/TGFBR2/TNFSF4/VAV1/VTCN1/WNT10B/XBP1/ZAP7…	72
136	Up	GO:0060840	artery development	43/2245	113/18888	0.380531	3.20155	8.62086	7.54036e-13	3.20022e-11	1.93762e-11	ACVRL1/ADAMTS9/ANGPTL3/APLNR/APOB/APOE/BMP4/COL3A1/COMP/EDNRA/EGR2/EYA1/FGF8/FKBP10/FOLR1/FOXC1/FOXC2/FOXF1/FOXH1/GJA5/HAND2/HEY2/HOXA1/HOXA13/JAG1/LOXL1/MDK/MYLK/MYOCD/NGFR/NKX3-1/NRP1/PRDM1/PRRX1/SHH/SIX1/SMAD6/STRA6/TBX2/TFAP2B/TGFB2/TGFBR2/WNT11	43
137	Up	GO:0051146	striated muscle cell differentiation	83/2245	313/18888	0.265176	2.23102	8.06578	7.66344e-13	3.22871e-11	1.95487e-11	ACTC1/ACTN3/ADAM12/ADAMTS15/ALPK2/ALPK3/ANKRD1/ASB2/AVPR1A/B4GALNT2/BARX2/BMP10/BMP2/BMP4/CAPN3/CAV2/CD53/CD9/CEACAM5/COL14A1/COL6A1/DKK1/DOCK2/EHD2/ERVW-1/FHL2/FLNC/GATA4/GATA6/GDF15/GREM1/HEY2/IGF1/IGF2/IGFBP5/IL4R/IRX3/KLF5/KLHL40/KRT19/KRT8/LDB3/LMOD1/LMOD3/MMP14/MSX1/MYBPC1/MYL9/MYLK3/MYOCD/MYOM3/MYOZ1/NFATC2/NOX4/NPHS1/NRAP/P2RX2/PDGFRA/PGM5/PIEZO1/POPDC3/PRKG1/RGS4/SHH/SHOX2/SIX1/SIX4/SMYD…	83
138	Up	GO:1905314	semi-lunar valve development	26/2245	47/18888	0.553191	4.6542	9.2122	7.92279e-13	3.31379e-11	2.00638e-11	BMP2/BMP4/CDH11/EMILIN1/GATA3/GATA4/GATA5/GJA5/HEY2/HEYL/JAG1/NFATC1/NOS3/SLIT2/SLIT3/SMAD6/SNAI1/SNAI2/STRA6/TBX20/TGFB1/TGFB2/TGFBR2/TIE1/TNFRSF1B/TWIST1	26
139	Up	GO:0001704	formation of primary germ layer	47/2245	131/18888	0.358779	3.01853	8.5146	8.18963e-13	3.40076e-11	2.05904e-11	APELA/BMP4/COL12A1/COL5A1/COL5A2/COL6A1/DKK1/ETS2/EYA1/EYA2/FN1/FOXC1/FOXC2/FOXF1/GATA6/GJA1/HAND1/HMGA2/HNF1B/HOXA11/ITGA4/ITGA5/ITGA8/ITGB2/ITGB4/ITGB5/KLF4/LAMB1/LAMB3/LEF1/MIXL1/MMP14/MMP2/NANOG/PAX2/POU5F1/SIX2/SNAI1/SOX17/TAL1/TBX20/TLX2/VTN/WLS/WNT11/WNT3A/WNT5A	47
140	Up	GO:0033627	cell adhesion mediated by integrin	37/2245	88/18888	0.420455	3.53744	8.76257	8.36034e-13	3.44685e-11	2.08694e-11	CCL5/CYP1B1/DPP4/EMILIN1/EMILIN2/FBN1/FERMT1/FOXC2/HRG/ICAM1/ITGA1/ITGA11/ITGA4/ITGA5/ITGA8/ITGA9/ITGAL/ITGAM/ITGAX/ITGB2/ITGB4/ITGB5/ITGB6/ITGB7/LYN/NCKAP1L/NPNT/P2RY12/PIEZO1/PLAU/PODXL/PTPN6/SERPINE1/SNAI2/SYK/TGFB2/VTN	37
141	Up	GO:0030168	platelet activation	48/2245	136/18888	0.352941	2.96942	8.46561	9.44741e-13	3.86741e-11	2.34157e-11	ADAMTS18/ADRA2B/APOE/CD40/CD9/CEACAM1/COL3A1/COMP/EMILIN1/EMILIN2/F11R/F2/FCER1G/FGA/FGB/FGG/FGL1/FZD6/GP9/HRG/IL6ST/LCK/LYN/MYL12A/MYL9/NOS3/P2RX1/P2RY12/PDGFRA/PEAR1/PF4/PLA2G4A/PLCG2/PLEK/PLSCR1/PRKG1/PTPN6/SELP/SVEP1/SYK/TEC/THBD/TLN1/TLR4/TXK/VAV1/VWF/WNT3A	48
142	Up	GO:0003231	cardiac ventricle development	46/2245	127/18888	0.362205	3.04736	8.50241	9.66003e-13	3.9266e-11	2.37741e-11	APLNR/BMP10/BMP4/DSP/EDNRA/FOXC1/FOXC2/FOXF1/FOXH1/GATA3/GATA4/GJA5/GRHL2/HAND1/HAND2/HEY2/HEYL/HOXA13/JAG1/MYL3/MYOCD/NOS3/PAX8/PKP2/POU4F1/PPP1R13L/PRDM1/PTK7/SALL4/SLIT2/SLIT3/SMAD6/STRA6/TBX20/TBX3/TBX5/TGFB1/TGFB2/TGFBR2/TGFBR3/TNNC1/TNNI1/TNNT2/TPM1/WNT11/WNT5A	46
143	Up	GO:0035136	forelimb morphogenesis	24/2245	41/18888	0.585366	4.9249	9.24002	1.12163e-12	4.52733e-11	2.74113e-11	ALDH1A2/ALX4/CRABP2/FMN1/HOXA11/HOXA13/HOXA9/HOXD10/HOXD9/MSX1/MSX2/OSR1/OSR2/RSPO2/RUNX2/SHH/SHOX2/TBX3/TBX5/TFAP2A/TFAP2B/TP63/TWIST1/ZBTB16	24
144	Up	GO:0001708	cell fate specification	42/2245	110/18888	0.381818	3.21237	8.54681	1.2176e-12	4.88054e-11	2.95499e-11	ATOH1/DBX1/DHH/DKK1/ESRP1/EYA1/EYA2/FOXA1/FOXA2/FOXI3/GSC/HNF1B/HOXA11/HOXA13/HOXC10/HOXD10/IHH/ISL2/LHX3/MNX1/NANOG/NRP1/OLIG3/PAX2/POU4F1/POU5F1/PRDM14/SHH/SIX1/SIX2/SOX17/SOX18/TBX15/TBX18/TBX2/TBX20/TBX3/TBX4/TBX5/TEAD4/TLX3/WNT3A	42
145	Up	GO:0071772	response to BMP	57/2245	180/18888	0.316667	2.66423	8.23968	1.36036e-12	5.36582e-11	3.24881e-11	ACVRL1/ADAMTS12/AMHR2/BAMBI/BMP10/BMP2/BMP4/BMP5/CDH5/CER1/COL2A1/COMP/DKK1/DLX3/DSG4/FAM83G/FBN1/FOXD1/FST/GATA3/GATA4/GATA5/GATA6/GDF3/GDF6/GDF7/GPC3/GREM1/HEYL/HFE/HOXA13/HTRA3/KCP/KDR/LEF1/MSX1/MSX2/PCSK6/PHOX2B/PPARG/RBPMS2/RUNX2/SKOR2/SLC39A5/SMAD6/SOST/SOSTDC1/SPINT1/SULF1/TBX20/TFAP2B/TGFBR3/TMEM100/TMPRSS6/TNFAIP6/WNT1/WNT5A	57
146	Up	GO:0071773	cellular response to BMP stimulus	57/2245	180/18888	0.316667	2.66423	8.23968	1.36036e-12	5.36582e-11	3.24881e-11	ACVRL1/ADAMTS12/AMHR2/BAMBI/BMP10/BMP2/BMP4/BMP5/CDH5/CER1/COL2A1/COMP/DKK1/DLX3/DSG4/FAM83G/FBN1/FOXD1/FST/GATA3/GATA4/GATA5/GATA6/GDF3/GDF6/GDF7/GPC3/GREM1/HEYL/HFE/HOXA13/HTRA3/KCP/KDR/LEF1/MSX1/MSX2/PCSK6/PHOX2B/PPARG/RBPMS2/RUNX2/SKOR2/SLC39A5/SMAD6/SOST/SOSTDC1/SPINT1/SULF1/TBX20/TFAP2B/TGFBR3/TMEM100/TMPRSS6/TNFAIP6/WNT1/WNT5A	57
147	Up	GO:0032526	response to retinoic acid	41/2245	106/18888	0.386792	3.25423	8.54778	1.36756e-12	5.36582e-11	3.24881e-11	ALDH1A2/AQP1/AQP3/COL1A1/CTSH/CYP26A1/DKK1/FZD10/FZD4/GATA6/GJB2/HAND2/HOXA2/HSD17B2/IGFBP7/KLF4/LRAT/LTK/LYN/MICB/MMP2/OSR1/PAX2/PCK1/PTK7/RARG/RBP4/SERPINF1/TBX2/TIE1/TRIML2/WNT10B/WNT11/WNT2/WNT3A/WNT5A/WNT6/WNT8A/WNT8B/WNT9A/YAP1	41
148	Up	GO:1903522	regulation of blood circulation	73/2245	262/18888	0.278626	2.34418	8.04679	1.37585e-12	5.36582e-11	3.24881e-11	ACE/ADM/ADM2/ADORA3/ADRA1D/ADRA2B/AGT/AGTR1/AGTR2/APELA/ARHGAP42/ATP2A3/AVP/AVPR1A/BDKRB2/BMP10/CAV1/CHRM2/CTNNA3/CYP2J2/DBH/DES/DSC2/DSG2/DSP/ECE1/EDN3/EDNRA/EDNRB/EPAS1/FGA/FGB/FGG/GATA4/GCH1/GJA1/GJA5/HEY2/HRC/HSPB7/HTR1A/IRX3/ITGA4/ITGA9/KCNE3/KCNE4/KCNG2/KCNH6/KCNJ12/KCNJ2/KCNN2/KCNQ1/MMP2/MTNR1B/MYL3/MYL4/NOS3/P2RX1/PKP2/RGS4/S100A1/SCN10A/SHOX2/STC1/SVEP1/TBX18/TBX2/TBX5/TGFB2/THRB/TNNT2/T…	73
149	Up	GO:0060326	cell chemotaxis	84/2245	322/18888	0.26087	2.19479	7.94208	1.45361e-12	5.63102e-11	3.40938e-11	ACKR3/AGTR1/AIF1/ALOX5/ANXA1/ARHGEF16/ARHGEF5/BIN2/C3AR1/CCL3/CCL3L3/CCL5/CCR1/CD74/CMKLR1/CSF1R/CSF3R/CX3CR1/CXCL1/CXCL12/CXCL14/CXCL2/CXCL3/CXCL6/CYP19A1/DPEP1/DPP4/EDN3/EDNRB/F2RL1/F7/FCER1G/FGF18/FGF4/FLT1/GPSM3/GREM1/HGF/HOXB9/HRG/IL1B/IL34/IL6R/ITGA1/ITGA9/ITGB2/KDR/LBP/LEF1/LGALS3/LPAR1/LYN/MDK/MET/MMP2/MMP28/NCKAP1L/NOD2/NRP1/PADI2/PDGFRA/PF4/PGF/PLA2G7/PPBP/PRSS56/RAC2/RARRES2/RHOG/RIN3/…	84
150	Up	GO:0016055	Wnt signaling pathway	109/2245	466/18888	0.233906	1.96793	7.7704	1.61209e-12	6.20334e-11	3.7559e-11	ALPK2/APCDD1/APCDD1L/APOE/ARHGEF19/BAMBI/BMP2/CAV1/CCND1/CDH3/COL1A1/COL6A1/CPZ/CTHRC1/DAAM2/DAB2/DCDC2/DKK1/DKK2/DLX3/EDNRA/EDNRB/FBXW4/FERMT1/FGF10/FOLR1/FOXD1/FOXL1/FOXO1/FRZB/FZD10/FZD4/FZD6/GLI1/GPC3/GPC5/GREM1/GRHL3/GSC/HHEX/HIC1/HNF1B/IGFBP4/IGFBP6/KLF4/KREMEN2/LBX2/LEF1/LGR4/LGR5/LGR6/LRRK2/MDFI/MDK/MITF/NID1/NKD1/NKD2/NOTUM/PLCG2/PLEKHA4/PTK7/RARG/RBMS3/RNF43/ROR1/ROR2/RSPO1/RSPO2/RSPO3/…	109
151	Up	GO:0002366	leukocyte activation involved in immune response	80/2245	301/18888	0.265781	2.23611	7.9398	1.75107e-12	6.69349e-11	4.05267e-11	ANXA1/ANXA3/APBB1IP/ASCL2/CCL3/CD177/CD180/CD244/CD28/CD300A/CD74/CD84/CD86/CDH17/CEACAM1/CX3CR1/DNASE1L3/DOCK2/DYSF/ENPP3/F2RL1/FCER1G/FES/FGL2/FOXF1/GATA2/GATA3/GRN/HLA-DMB/HLA-DRB1/HLX/ICAM1/IL18/IL18R1/IL4R/IL6R/IRF8/ITGAL/ITGAM/ITGB2/ITM2A/KLRC2/LBP/LCP1/LEF1/LGALS1/LGALS3/LYN/MDK/MILR1/NCKAP1L/NFKBIZ/NKX2-3/NMI/PCK1/PLCG2/PTGDR/PTGDS/PTGER4/PTPN6/PTPRC/PYCARD/RAC2/S100A13/SPI1/SPN/ST3GAL1/S…	80
152	Up	GO:0050670	regulation of lymphocyte proliferation	68/2245	237/18888	0.28692	2.41396	8.04515	1.82346e-12	6.92436e-11	4.19245e-11	AHR/AIF1/ANXA1/ARG1/BMP4/CARD11/CCL5/CD28/CD300A/CD55/CD70/CD74/CD86/CEBPB/CLC/EBI3/EPO/FGF10/GAL/GPNMB/HHLA2/HLA-DMB/HLA-DPA1/HLA-DRB1/HLA-E/HLA-G/ICOSLG/IDO1/IGF1/IGF2/IHH/IL18/IL1A/IL1B/IL6ST/LGALS3/LILRB2/LRRC32/LYN/MNDA/NCKAP1L/NFATC2/PLA2G2A/PLA2G5/PTPN6/PTPRC/PYCARD/RAC2/RIPK3/SASH3/SDC4/SHH/SPN/SPTA1/SYK/TGFBR2/TICAM1/TLR4/TNFRSF1B/TNFRSF9/TNFSF4/TYROBP/VSIG4/VTCN1/WNT3A/ZAP70/ZBTB7B/ZP3	68
153	Up	GO:0098773	skin epidermis development	46/2245	129/18888	0.356589	3.00011	8.3718	1.83966e-12	6.94021e-11	4.20205e-11	ALX4/APCDD1/CDH3/CLDN1/CLDN4/COL6A1/DKK1/DLX3/DSG4/EDAR/FA2H/FERMT1/FGF10/FLG/FOXI3/FOXQ1/FST/FZD6/GAL/GATA6/GRHL3/HPSE/IGFBP5/IL18/KLF4/KRT16/LAMA5/LGR4/LGR5/LSR/MET/MSX2/NFKBIZ/NGFR/SFN/SHH/SNAI1/SOSTDC1/SOX18/TGFB2/TNFRSF19/TP63/TRADD/WNT10A/WNT10B/WNT5A	46
154	Up	GO:0048863	stem cell differentiation	70/2245	248/18888	0.282258	2.37474	8.00382	2.03142e-12	7.61388e-11	4.60993e-11	A2M/ACE/ALDH1A2/BMP4/CDX2/CYP26C1/DNMT3L/EDN3/EDNRA/EDNRB/EPCAM/FN1/FOLR1/FOXA1/FOXC1/FOXC2/FRZB/GATA6/GBX2/GDNF/GREM1/GSC/HAND2/HMGA2/HNF1B/HOXA7/HOXB4/HOXD4/JAG1/LAMA5/LIN28A/MEOX1/MSX1/MSX2/MYOCD/NRP1/NRTN/OSR1/OVOL2/PAX2/PDGFRA/PDX1/PHOX2B/PITX2/PTPRC/RUNX2/SEMA3B/SEMA3D/SEMA3G/SHH/SIX1/SNAI2/SOX10/SOX17/SOX18/TACSTD2/TAL1/TBX2/TBX3/TBX5/TCF15/TGFB2/TGFBR2/TP63/TRIM6/TWIST1/WNT10A/WNT8A/YAP1/…	70
155	Up	GO:0002237	response to molecule of bacterial origin	92/2245	369/18888	0.249322	2.09764	7.82057	2.08636e-12	7.76934e-11	4.70406e-11	ACE/ACP5/ADM/AHR/ANKRD1/BDKRB1/C4B/CARD16/CD180/CD36/CD40/CD55/CD86/CEBPB/CLDN1/COL6A1/CPS1/CSF2RB/CX3CR1/CXCL1/CXCL2/CXCL3/CXCL6/CYP1A1/EDNRB/EPO/FGF10/FMO1/FOSL2/GBP2/GCH1/GJB2/GJB6/HCK/HMGCS2/IDO1/IL12RB2/IL1A/IL1B/IRF8/LBP/LILRB2/LOXL1/LY86/LYN/MAOB/MGST2/MPO/MRC1/NFKB2/NFKBIZ/NLRP7/NOD2/NOS3/NQO1/NR1H4/OPRK1/PCK1/PCK2/PF4/PLCG2/PLSCR4/PPBP/PTGER2/PTGER4/PTGFR/PTGIR/PYCARD/REN/S100A14/SASH1/S…	92
156	Up	GO:0198738	cell-cell signaling by wnt	109/2245	468/18888	0.232906	1.95952	7.71982	2.15141e-12	7.96022e-11	4.81963e-11	ALPK2/APCDD1/APCDD1L/APOE/ARHGEF19/BAMBI/BMP2/CAV1/CCND1/CDH3/COL1A1/COL6A1/CPZ/CTHRC1/DAAM2/DAB2/DCDC2/DKK1/DKK2/DLX3/EDNRA/EDNRB/FBXW4/FERMT1/FGF10/FOLR1/FOXD1/FOXL1/FOXO1/FRZB/FZD10/FZD4/FZD6/GLI1/GPC3/GPC5/GREM1/GRHL3/GSC/HHEX/HIC1/HNF1B/IGFBP4/IGFBP6/KLF4/KREMEN2/LBX2/LEF1/LGR4/LGR5/LGR6/LRRK2/MDFI/MDK/MITF/NID1/NKD1/NKD2/NOTUM/PLCG2/PLEKHA4/PTK7/RARG/RBMS3/RNF43/ROR1/ROR2/RSPO1/RSPO2/RSPO3/…	109
157	Up	GO:0003197	endocardial cushion development	27/2245	52/18888	0.519231	4.36848	8.93336	2.18793e-12	8.04376e-11	4.87021e-11	ACVRL1/APLNR/BMP2/BMP4/BMP5/DKK1/ERBB3/FGF8/FOXF1/GATA4/GATA5/HEY2/HEYL/JAG1/MSX1/MSX2/NOS3/SNAI1/SNAI2/TBX2/TBX20/TBX3/TBX5/TGFB2/TGFBR2/TMEM100/TWIST1	27
158	Up	GO:0050729	positive regulation of inflammatory response	51/2245	153/18888	0.333333	2.80445	8.23074	2.31359e-12	8.45194e-11	5.11735e-11	AGT/AGTR1/ALOX5AP/C3/CASP4/CCL3/CD28/CEBPA/CEBPB/CREB3L3/CTSC/ETS1/GPSM3/GRN/GSDMD/HLA-E/IDO1/IL18/IL1B/IL6ST/LBP/LGALS1/LGALS2/LRRK2/MDK/MGST2/NFKBIZ/NLRP1/NLRP12/NMI/NUPR1/OSMR/PLA2G2A/PLA2G7/PLCG2/PTGER4/PYCARD/SERPINE1/SUCNR1/TGFB1/TLR2/TLR4/TNFRSF11A/TNFSF4/TRADD/TREM2/TRPV4/TSLP/VAMP8/WNT5A/ZP3	51
159	Up	GO:0060349	bone morphogenesis	39/2245	99/18888	0.393939	3.31436	8.47949	2.43259e-12	8.83078e-11	5.34671e-11	ACP5/ACTN3/BMP4/CDX1/CER1/COL13A1/COL1A1/COL27A1/COL2A1/COL3A1/COMP/FGF18/FGF4/FOSL2/FOXC1/FREM1/GHR/HAS2/HOXA11/IHH/MMP14/MSX1/MSX2/NEUROG1/OSR2/PAPPA2/PHOSPHO1/RARG/RUNX2/SERPINH1/SHOX2/SP5/STC1/TEK/TFAP2A/TGFBR2/TMEM119/TRPV4/TWIST1	39
160	Up	GO:0032496	response to lipopolysaccharide	88/2245	348/18888	0.252874	2.12752	7.79708	2.75272e-12	9.93044e-11	6.01252e-11	ACE/ACP5/ADM/ANKRD1/BDKRB1/CARD16/CD180/CD36/CD40/CD55/CD86/CEBPB/CLDN1/COL6A1/CPS1/CSF2RB/CX3CR1/CXCL1/CXCL2/CXCL3/CXCL6/CYP1A1/EDNRB/EPO/FGF10/FMO1/FOSL2/GBP2/GCH1/GJB2/GJB6/HCK/HMGCS2/IDO1/IL12RB2/IL1A/IL1B/IRF8/LBP/LILRB2/LOXL1/LY86/LYN/MAOB/MGST2/MPO/MRC1/NFKB2/NFKBIZ/NLRP7/NOD2/NOS3/NQO1/NR1H4/OPRK1/PCK1/PCK2/PF4/PLCG2/PLSCR4/PPBP/PTGER2/PTGER4/PTGFR/PTGIR/PYCARD/REN/S100A14/SASH1/SELP/SERP…	88
161	Up	GO:0060021	roof of mouth development	37/2245	91/18888	0.406593	3.42082	8.50183	2.85061e-12	1.02197e-10	6.18766e-11	ALX4/BNC2/CLDN5/COL2A1/CSRNP1/EPHB3/FOXF2/FRAS1/HAND2/IRF6/ITGB6/LEF1/LRRC32/MEOX2/MSC/MSX1/OSR1/OSR2/PDGFRA/PKDCC/PRRX1/SHH/SNAI1/SNAI2/TBX2/TBX3/TCF21/TFAP2A/TGFB2/TGFBR2/TGFBR3/TWIST1/WFIKKN1/WNT11/WNT3A/WNT5A/WNT8A	37
162	Up	GO:0035137	hindlimb morphogenesis	22/2245	36/18888	0.611111	5.1415	9.1349	2.91372e-12	1.03815e-10	6.28561e-11	ALX4/BMP4/FGF4/FGF8/FMN1/GPC3/HOXD10/HOXD9/MSX1/MSX2/OSR1/OSR2/PITX1/RARG/RSPO2/SHH/TBX3/TBX4/TFAP2B/TP63/TWIST1/ZBTB16	22
163	Up	GO:0001658	branching involved in ureteric bud morphogenesis	29/2245	60/18888	0.483333	4.06646	8.73745	3.50233e-12	1.24021e-10	7.50903e-11	AGT/AGTR2/BMP2/BMP4/EYA1/FGF8/FOXD1/GDNF/GPC3/GREM1/HNF1B/HOXA11/HOXB7/HOXD11/HS3ST3A1/LAMA5/LGR4/NPNT/PAX2/PAX8/SHH/SIX1/SIX2/SIX4/TACSTD2/TCF21/WNT1/WNT6/WT1	29
164	Up	GO:1903035	negative regulation of response to wounding	39/2245	100/18888	0.39	3.28121	8.40038	3.53408e-12	1.24382e-10	7.5309e-11	ADAMTS18/ADTRP/ALOX5/ANXA2/APOE/APOH/CD9/CEACAM1/CLDN19/CLDN3/EPPK1/F11/F2/FGA/FGB/FGG/FIGNL2/HRG/KNG1/MDK/MYOZ1/NOS3/PDGFRA/PHLDB2/PLAT/PLAU/PLG/PRKG1/PROC/PTPN6/SERPINE1/SERPINF2/SERPING1/TFPI/THBD/THBS1/TSPAN8/VTN/WFDC1	39
165	Up	GO:0090132	epithelium migration	93/2245	378/18888	0.246032	2.06995	7.71759	3.56464e-12	1.24698e-10	7.54999e-11	ACVRL1/ADAMTS9/ADTRP/AGT/AGTR2/ANGPT1/ANGPT2/ANGPT4/ANXA1/ANXA3/APELA/APOA1/APOE/APOH/BMP10/CARD10/CCBE1/CD40/CDH5/CEACAM1/CLEC14A/CTSH/CYP1B1/DAAM2/DCN/DPP4/ENPP2/EPHB4/EPPK1/ETS1/FERMT1/FGF10/FGF18/FGF4/FGF8/FGFBP1/FOXC2/GATA2/GATA3/GDF6/GREM1/GRHL2/GRN/HAS2/HMOX1/HRG/ID1/KANK2/KDR/KLF4/KRT16/LOXL2/LRG1/MARVELD3/MEOX2/MET/NOS3/NR2F2/NRP1/PLCG2/PLG/PPARG/PRSS3/RAB25/RGCC/RRAS/RREB1/S100P/SASH1/S…	93
166	Up	GO:0002263	cell activation involved in immune response	80/2245	305/18888	0.262295	2.20678	7.80361	3.66495e-12	1.27434e-10	7.71568e-11	ANXA1/ANXA3/APBB1IP/ASCL2/CCL3/CD177/CD180/CD244/CD28/CD300A/CD74/CD84/CD86/CDH17/CEACAM1/CX3CR1/DNASE1L3/DOCK2/DYSF/ENPP3/F2RL1/FCER1G/FES/FGL2/FOXF1/GATA2/GATA3/GRN/HLA-DMB/HLA-DRB1/HLX/ICAM1/IL18/IL18R1/IL4R/IL6R/IRF8/ITGAL/ITGAM/ITGB2/ITM2A/KLRC2/LBP/LCP1/LEF1/LGALS1/LGALS3/LYN/MDK/MILR1/NCKAP1L/NFKBIZ/NKX2-3/NMI/PCK1/PLCG2/PTGDR/PTGDS/PTGER4/PTPN6/PTPRC/PYCARD/RAC2/S100A13/SPI1/SPN/ST3GAL1/S…	80
167	Up	GO:0097191	extrinsic apoptotic signaling pathway	66/2245	230/18888	0.286957	2.41427	7.9257	3.8317e-12	1.32435e-10	8.01843e-11	AGT/AGTR2/ATF3/BCL2L12/BMP4/BMP5/CASP10/CAV1/CD70/COL2A1/DBH/ERBB3/EYA1/EYA2/FAIM/FGA/FGB/FGF10/FGG/G0S2/GDNF/GPER1/HGF/HMOX1/ICAM1/IFI27/IFI6/IGF1/IL1A/IL1B/IL6R/KRT18/KRT8/LGALS3/LTB/LTBR/MAL/NFKBIZ/NGF/NOS3/NRP1/PF4/PTPRC/PYCARD/SERPINE1/SNAI2/SP100/SPI1/SRPX/TERT/TGFB1/TGFB2/THBS1/TLR4/TLR6/TMBIM1/TNFAIP3/TNFRSF10A/TNFRSF10C/TNFRSF12A/TNFRSF1B/TNFSF12/TRADD/TRAF1/UNC5B/YAP1	66
168	Up	GO:0032944	regulation of mononuclear cell proliferation	68/2245	241/18888	0.282158	2.37389	7.88372	4.26897e-12	1.4667e-10	8.88031e-11	AHR/AIF1/ANXA1/ARG1/BMP4/CARD11/CCL5/CD28/CD300A/CD55/CD70/CD74/CD86/CEBPB/CLC/EBI3/EPO/FGF10/GAL/GPNMB/HHLA2/HLA-DMB/HLA-DPA1/HLA-DRB1/HLA-E/HLA-G/ICOSLG/IDO1/IGF1/IGF2/IHH/IL18/IL1A/IL1B/IL6ST/LGALS3/LILRB2/LRRC32/LYN/MNDA/NCKAP1L/NFATC2/PLA2G2A/PLA2G5/PTPN6/PTPRC/PYCARD/RAC2/RIPK3/SASH3/SDC4/SHH/SPN/SPTA1/SYK/TGFBR2/TICAM1/TLR4/TNFRSF1B/TNFRSF9/TNFSF4/TYROBP/VSIG4/VTCN1/WNT3A/ZAP70/ZBTB7B/ZP3	68
169	Up	GO:0050866	negative regulation of cell activation	63/2245	215/18888	0.293023	2.46531	7.93626	4.32944e-12	1.47867e-10	8.95282e-11	ADAMTS18/ANXA1/APOE/ARG1/ASCL2/BMP4/CD300A/CD33/CD74/CD84/CD86/CD9/CEACAM1/CEBPB/EMILIN1/ENPP3/F2/FGL1/FGL2/FN1/GAL/GPER1/GPNMB/GRN/HFE/HLA-DRB1/HLA-E/HLA-G/HLX/ID2/IDO1/IHH/IL31RA/IL4R/LAPTM5/LGALS3/LILRB2/LRRC32/LYN/MDK/MILR1/MNDA/NOS3/PDGFRA/PLA2G2A/PLA2G5/PRKG1/PTPN6/PTPRC/RUNX1/RUNX3/SDC4/SHH/SOCS1/SPN/THBD/TNFAIP3/TNFSF4/TREM2/TYROBP/VSIG4/VTCN1/ZBTB7B	63
170	Up	GO:0002275	myeloid cell activation involved in immune response	38/2245	97/18888	0.391753	3.29596	8.32623	5.67195e-12	1.92579e-10	1.166e-10	ANXA3/CCL3/CD177/CD300A/CD84/CX3CR1/DNASE1L3/DOCK2/DYSF/ENPP3/F2RL1/FCER1G/FES/FOXF1/GATA2/GRN/IL4R/ITGAM/ITGB2/LBP/LYN/MILR1/NMI/PLCG2/PTGDR/PTGDS/PTPN6/PYCARD/RAC2/S100A13/SPI1/STXBP2/SUCNR1/SYK/TICAM1/TREM2/TYROBP/VAMP8	38
171	Up	GO:0042129	regulation of T cell proliferation	56/2245	181/18888	0.309392	2.60303	7.95889	6.11436e-12	2.06387e-10	1.2496e-10	AIF1/ANXA1/ARG1/BMP4/CARD11/CCL5/CD28/CD55/CD70/CD86/CEBPB/CLC/EBI3/EPO/GPNMB/HHLA2/HLA-DMB/HLA-DPA1/HLA-DRB1/HLA-E/HLA-G/ICOSLG/IDO1/IGF1/IGF2/IHH/IL18/IL1A/IL1B/IL6ST/LGALS3/LILRB2/LRRC32/NCKAP1L/PLA2G2A/PLA2G5/PTPN6/PTPRC/PYCARD/RAC2/RIPK3/SASH3/SDC4/SHH/SPN/SPTA1/SYK/TGFBR2/TNFRSF1B/TNFRSF9/TNFSF4/VSIG4/VTCN1/ZAP70/ZBTB7B/ZP3	56
172	Up	GO:0090303	positive regulation of wound healing	30/2245	65/18888	0.461538	3.88309	8.55154	6.66586e-12	2.23694e-10	1.35439e-10	ANXA1/APOH/CD36/CLDN1/CLDN3/CLDN4/CLEC7A/DDR2/DUOX2/EMILIN1/EMILIN2/F2/F7/FERMT1/FOXC2/HPSE/HRG/MYLK/OCLN/PLAT/PLAU/PLG/RREB1/SERPINE1/SERPINF2/SMOC2/THBD/THBS1/VTN/XBP1	30
173	Up	GO:0048645	animal organ formation	31/2245	69/18888	0.449275	3.77992	8.49634	7.19026e-12	2.39897e-10	1.45249e-10	BMP2/BMP4/DKK1/EYA1/FGF10/FGF8/FOLR1/FOXH1/GATA5/GATA6/GDNF/HAND2/HOXA11/HOXA3/HOXC11/NKX3-2/NTF4/PAX2/PAX8/RBM20/SHH/SIX1/SOX17/SULF1/TBX5/TGFBR2/TP63/WNT11/WNT2/WNT5A/WT1	31
174	Up	GO:0003170	heart valve development	32/2245	73/18888	0.438356	3.68805	8.45124	7.4815e-12	2.4818e-10	1.50264e-10	ADAMTS9/APLNR/BMP2/BMP4/CDH11/DKK1/EMILIN1/GATA3/GATA4/GATA5/GJA5/HEY2/HEYL/JAG1/NFATC1/NOS3/PRDM1/SHOX2/SLIT2/SLIT3/SMAD6/SNAI1/SNAI2/STRA6/TBX20/TBX5/TGFB1/TGFB2/TGFBR2/TIE1/TNFRSF1B/TWIST1	32
175	Up	GO:0002698	negative regulation of immune effector process	43/2245	121/18888	0.355372	2.98987	8.06482	1.0995e-11	3.62486e-10	2.19472e-10	A2M/ACP5/AHR/ANGPT1/ANXA1/APOA1/APOA2/ARG1/ASCL2/BST2/C4BPB/CD300A/CD55/CD84/CEACAM1/CR1L/CX3CR1/ENPP3/FGL2/FOXF1/GRN/HFE/HLA-E/HLA-G/HLX/IL4R/LGALS3/NCKAP1L/NOD2/PRG2/PTPN6/PTPRC/SERPINB9/SERPING1/SPI1/SPN/SVEP1/TGFB1/TGFB2/TNFSF4/TWIST1/VSIG4/ZBTB7B	43
176	Up	GO:0051251	positive regulation of lymphocyte activation	83/2245	328/18888	0.253049	2.12899	7.57552	1.10529e-11	3.62486e-10	2.19472e-10	AIF1/ANXA1/CARD11/CAV1/CCL5/CD28/CD4/CD55/CD70/CD74/CD86/CLEC7A/DOCK8/DPP4/EBI3/EPO/FGF10/GATA3/HHLA2/HLA-DMB/HLA-DOA/HLA-DPA1/HLA-DQB1/HLA-DQB2/HLA-DRB1/HLA-E/HLA-G/HLX/ICOSLG/IGF1/IGF2/IHH/IL18/IL1A/IL1B/IL2RG/IL4R/IL6ST/LCK/LEF1/LGALS1/LILRB2/LYN/MDK/MMP14/NCKAP1L/NFATC2/NFKBIZ/NOD2/PCK1/PIK3R6/PTPN6/PTPRC/PYCARD/RAG1/RHOH/RUNX1/RUNX3/SASH3/SHH/SMARCD2/SOCS1/SOX13/SPI1/SPN/SPTA1/STAT6/SYK/TGFB…	83
177	Up	GO:0072089	stem cell proliferation	44/2245	126/18888	0.349206	2.938	8.01629	1.25327e-11	4.08693e-10	2.47449e-10	ACE/CD34/CEBPA/EPCAM/FERMT1/FGF10/FGF4/FGF8/GJA1/HMGA2/HOXA3/HOXB4/IRF6/KDR/MECOM/NANOG/OSR2/OVOL1/OVOL2/PRRX1/PTPRC/RARG/RNF43/RUNX1/RUNX2/SFN/SHH/SHOX2/SIX2/SNAI2/SOX17/SOX18/TBX3/TERT/TGFB1/TGFBR2/TP63/TRIM71/VEGFC/WNT1/WNT10B/WNT11/WNT5A/YAP1	44
178	Up	GO:0070374	positive regulation of ERK1 and ERK2 cascade	62/2245	215/18888	0.288372	2.42618	7.72432	1.36064e-11	4.41215e-10	2.6714e-10	ACKR3/ACTA2/ADCYAP1/ALOX15/ANGPT1/APELA/APOE/BMP2/BMP4/CCL3/CCL3L3/CCL5/CCR1/CD36/CD4/CD44/CD74/CHI3L1/CSF1R/EPO/F2RL1/FGA/FGB/FGF10/FGF18/FGF20/FGF23/FGF4/FGF8/FGG/FSHR/GCG/GPBAR1/GPER1/GPNMB/HAND2/HLA-DRB1/ICAM1/IGF1/IL1A/KDR/NOD1/NOD2/NOX4/NPNT/NPSR1/NRP1/NTRK1/P2RY6/PDGFRA/PLA2G2A/PLA2G5/PTPRC/PYCARD/SERPINF2/SHC1/TEK/TGFB1/TLR4/TPBG/TREM2/TRPV4	62
179	Up	GO:0016331	morphogenesis of embryonic epithelium	49/2245	150/18888	0.326667	2.74837	7.89569	1.42857e-11	4.60655e-10	2.7891e-10	ADM/ALDH1A2/ALDH1A3/BMP4/BMP5/CTHRC1/DLC1/FGF10/FGF8/FOLR1/FZD6/GATA3/GDF7/GDNF/GREM1/GRHL2/GRHL3/HAND1/HNF1B/IRX1/IRX2/IRX3/LAMA5/OSR1/OVOL2/PAX2/PAX8/PDX1/PTK7/RARG/SALL4/SDC4/SHH/SIX1/SIX4/SPINT1/ST14/SULF1/TBX18/TFAP2A/TGFB1/TGFB2/TP63/TRIM71/TWIST1/VEGFC/WNT2/WNT5A/WNT6	49
180	Up	GO:0010810	regulation of cell-substrate adhesion	63/2245	221/18888	0.285068	2.39838	7.67994	1.60984e-11	5.16222e-10	3.12554e-10	ABI3BP/ACVRL1/AGR2/ALOX15/ANGPT2/APOA1/ARHGAP6/CCDC80/CD36/CEACAM6/COL1A1/DAB2/DLC1/ECM2/EGFL6/EGFLAM/EMILIN1/EPHA1/FBLN2/FERMT1/FGA/FGB/FGG/FMN1/FN1/FOXF1/FZD4/GREM1/HAS2/HOXA7/HRG/ITGA5/JAG1/KDR/LIMS2/MDK/MMP14/MYADM/NDNF/NID1/NPNT/NRP1/ONECUT1/PHLDB2/PKHD1/PKP2/PLAU/PLG/POSTN/RAC2/RRAS/RREB1/S100A10/SDC4/SERPINE1/SPRY4/TACSTD2/TEK/THBS1/TLN1/VIT/VTN/WNT1	63
181	Up	GO:0010543	regulation of platelet activation	26/2245	52/18888	0.5	4.20668	8.50427	1.71954e-11	5.48353e-10	3.32008e-10	ADAMTS18/APOE/CD9/CEACAM1/EMILIN1/EMILIN2/F11R/F2/FCER1G/GP9/HRG/IL6ST/LYN/NOS3/PDGFRA/PEAR1/PLA2G4A/PLEK/PRKG1/SELP/SVEP1/SYK/TEC/THBD/TLR4/TXK	26
182	Up	GO:0072091	regulation of stem cell proliferation	37/2245	96/18888	0.385417	3.24265	8.09067	1.90357e-11	6.03702e-10	3.6552e-10	ACE/CEBPA/EPCAM/FERMT1/FGF10/FGF4/FGF8/GJA1/HMGA2/HOXA3/IRF6/KDR/NANOG/OSR2/OVOL1/OVOL2/PRRX1/PTPRC/RARG/RUNX2/SFN/SHH/SHOX2/SNAI2/SOX17/SOX18/TBX3/TERT/TGFB1/TGFBR2/TP63/VEGFC/WNT1/WNT10B/WNT11/WNT5A/YAP1	37
183	Up	GO:2001236	regulation of extrinsic apoptotic signaling pathway	50/2245	157/18888	0.318471	2.67941	7.76071	2.53639e-11	8.00001e-10	4.84372e-10	AGT/AGTR2/ATF3/BCL2L12/BMP4/BMP5/CAV1/COL2A1/DBH/EYA1/EYA2/FAIM/FGA/FGB/FGF10/FGG/G0S2/GDNF/GPER1/HGF/HMOX1/ICAM1/IFI6/IGF1/IL1A/IL1B/LGALS3/LTB/LTBR/MAL/NOS3/NRP1/PF4/PTPRC/PYCARD/SERPINE1/SNAI2/SP100/SRPX/TERT/THBS1/TLR4/TLR6/TMBIM1/TNFAIP3/TNFRSF12A/TNFSF12/TRAF1/UNC5B/YAP1	50
184	Up	GO:0008217	regulation of blood pressure	56/2245	187/18888	0.299465	2.51951	7.66948	2.58925e-11	8.12237e-10	4.9178e-10	ACE/ACSM3/ACTA2/ACVRL1/ADM/ADM2/ADRA2B/ADRB3/AGT/AGTR1/AGTR2/AGTRAP/ARHGAP42/AVP/AVPR1A/BDKRB1/COL1A2/CTSZ/CYP4F12/ECE1/EDN3/EDNRA/EDNRB/EMILIN1/EMILIN2/ENPEP/F2RL1/GCGR/GCH1/GJA5/HSD11B2/ID2/KCNK6/KCNQ1/NAV2/NOS3/NPPB/NPR3/NR2F2/OR51E2/P2RX1/P2RX2/PCSK5/POMC/POSTN/PPARG/PTGS1/REN/SCNN1A/SCPEP1/SERPINF2/SLC2A5/SUCNR1/TPM1/UTS2R/VEGFC	56
185	Up	GO:0042098	T cell proliferation	61/2245	213/18888	0.286385	2.40946	7.59777	2.72852e-11	8.51297e-10	5.1543e-10	AIF1/ANXA1/ARG1/BMP4/CARD11/CCL5/CD28/CD55/CD70/CD86/CEBPB/CLC/DOCK2/DOCK8/EBI3/ELF4/EPO/GJA1/GPNMB/HHLA2/HLA-DMB/HLA-DPA1/HLA-DRB1/HLA-E/HLA-G/ICOSLG/IDO1/IGF1/IGF2/IHH/IL18/IL1A/IL1B/IL6ST/LGALS3/LILRB2/LRRC32/NCKAP1L/PLA2G2A/PLA2G5/PTPN6/PTPRC/PYCARD/RAC2/RIPK3/SASH3/SDC4/SH2D2A/SHH/SPN/SPTA1/SYK/TGFBR2/TNFRSF1B/TNFRSF9/TNFSF4/VSIG4/VTCN1/ZAP70/ZBTB7B/ZP3	61
186	Up	GO:0010951	negative regulation of endopeptidase activity	43/2245	124/18888	0.346774	2.91754	7.86803	2.78062e-11	8.62098e-10	5.21969e-10	AHSG/ANXA8/ANXA8L1/AQP1/AVP/BCL2L12/CARD16/CD44/CST1/CST2/CST3/DPEP1/FABP1/FETUB/HRG/IFI16/IFI6/KLF4/KNG1/MAGEA3/PAX2/SERPINA1/SERPINA10/SERPINA12/SERPINA4/SERPINA5/SERPINA6/SERPINA7/SERPINB1/SERPINB11/SERPINB13/SERPINB7/SERPINB9/SERPIND1/SERPINE1/SERPINE3/SERPINF1/SERPINF2/SERPING1/SERPINH1/SFN/THBS1/VTN	43
187	Up	GO:0048880	sensory system development	95/2245	403/18888	0.235732	1.9833	7.32828	2.79301e-11	8.62098e-10	5.21969e-10	ACVRL1/ADAMTS18/ALDH1A2/ALDH1A3/AQP1/ARHGEF15/BARHL2/BCAR3/BIRC7/BMP4/C1QA/C3/CALB1/CDKN1C/COL4A1/COL5A1/COL5A2/COL8A2/CPAMD8/CRYAB/CRYBA1/CRYBA4/CRYBB1/CYP1A1/CYP1B1/EFEMP1/FBN1/FBN2/FGF10/FLT1/FOXC1/FOXC2/FOXF2/FREM2/FZD4/GATA3/GDF3/GJA1/GNGT1/GRHL2/GRHL3/IHH/ITGAM/JAG1/KDR/KLF4/LAMC3/LIM2/MAB21L2/MAF/MFAP2/MITF/MTNR1B/MYO7A/NEUROD4/NKD1/NRP1/OSR2/P2RY12/PAX2/PDE6A/PDGFRA/PHOX2B/PITX2/PITX3/POU…	95
188	Up	GO:0022408	negative regulation of cell-cell adhesion	59/2245	203/18888	0.29064	2.44526	7.60365	2.97702e-11	9.14008e-10	5.53399e-10	ADAMTS18/ADTRP/ANXA1/APOA1/ARG1/ASCL2/B4GALNT2/BMP2/BMP4/CD300A/CD74/CD86/CD9/CDH1/CEACAM1/CEBPB/CXCL12/EPCAM/FGL1/FGL2/FXYD5/GPNMB/HFE/HLA-DRB1/HLA-E/HLA-G/HLX/IDO1/IHH/IL4R/JAG1/KLF4/LAPTM5/LGALS3/LILRB2/LRRC32/MDK/MYADM/PLA2G2A/PLA2G5/PLG/PODXL/PRKG1/PTPN6/RGCC/RUNX1/RUNX3/SDC4/SHH/SOCS1/SPI1/SPN/TGFB1/TNFSF4/TRPV4/VSIG4/VTCN1/WNT1/ZBTB7B	59
189	Up	GO:0048483	autonomic nervous system development	24/2245	46/18888	0.521739	4.38958	8.45347	3.2118e-11	9.80872e-10	5.93882e-10	ACKR3/EDNRA/EDNRB/EGR2/FN1/GATA3/GBX2/GDNF/GFRA3/HAND2/HLX/HOXB1/HOXB2/NAV2/NRP1/NTRK1/PHOX2A/PHOX2B/SIX1/SOX10/TFAP2A/TFAP2B/TLX2/TP63	24
190	Up	GO:0010631	epithelial cell migration	90/2245	375/18888	0.24	2.01921	7.32173	3.36189e-11	1.02131e-09	6.18364e-10	ACVRL1/ADAMTS9/ADTRP/AGT/AGTR2/ANGPT1/ANGPT2/ANGPT4/ANXA1/ANXA3/APOA1/APOE/APOH/BMP10/CARD10/CCBE1/CD40/CDH5/CEACAM1/CLEC14A/CTSH/CYP1B1/DAAM2/DCN/DPP4/ENPP2/EPHB4/EPPK1/ETS1/FERMT1/FGF10/FGF18/FGF4/FGFBP1/FOXC2/GATA2/GATA3/GDF6/GREM1/GRN/HAS2/HMOX1/HRG/ID1/KANK2/KDR/KLF4/KRT16/LOXL2/LRG1/MARVELD3/MEOX2/MET/NOS3/NR2F2/NRP1/PLCG2/PLG/PPARG/PRSS3/RAB25/RGCC/RRAS/RREB1/S100P/SASH1/SERPINF1/SH3BP1/SL…	90
191	Up	GO:0034368	protein-lipid complex remodeling	20/2245	33/18888	0.606061	5.09901	8.65558	3.58811e-11	1.06756e-09	6.46366e-10	AGT/AGTR1/APOA1/APOA2/APOA4/APOA5/APOB/APOC1/APOC3/APOE/APOM/LIPC/MPO/MTTP/NR1H4/PCSK5/PCSK6/PLA2G2A/PLA2G5/PLA2G7	20
192	Up	GO:0034369	plasma lipoprotein particle remodeling	20/2245	33/18888	0.606061	5.09901	8.65558	3.58811e-11	1.06756e-09	6.46366e-10	AGT/AGTR1/APOA1/APOA2/APOA4/APOA5/APOB/APOC1/APOC3/APOE/APOM/LIPC/MPO/MTTP/NR1H4/PCSK5/PCSK6/PLA2G2A/PLA2G5/PLA2G7	20
193	Up	GO:0035115	embryonic forelimb morphogenesis	20/2245	33/18888	0.606061	5.09901	8.65558	3.58811e-11	1.06756e-09	6.46366e-10	ALDH1A2/ALX4/CRABP2/HOXA11/HOXA13/HOXA9/HOXD9/MSX1/MSX2/OSR1/OSR2/RSPO2/RUNX2/SHH/SHOX2/TBX3/TBX5/TFAP2A/TP63/TWIST1	20
194	Up	GO:0048566	embryonic digestive tract development	20/2245	33/18888	0.606061	5.09901	8.65558	3.58811e-11	1.06756e-09	6.46366e-10	ALDH1A2/FGF10/FOXF1/FOXF2/HLX/HNF1B/ID2/IHH/OVOL2/PCSK5/PDGFRA/PKDCC/RARRES2/RBPMS2/SHH/SHOX2/SIX2/STRA6/TCF21/TGFB2	20
195	Up	GO:0003012	muscle system process	104/2245	459/18888	0.22658	1.9063	7.21937	3.94743e-11	1.16844e-09	7.07448e-10	ACTA2/ACTN3/ADRA2B/AGT/ARHGAP42/BDKRB2/BMP10/CAV1/CHRM2/CHRNA1/CHRND/CHRNG/CNN1/COL14A1/COL6A1/COMP/CRYAB/CTNNA3/CYBA/DES/DSC2/DSG2/DSP/EDN3/EDNRA/EDNRB/FOXO1/GATA4/GATA5/GATA6/GDNF/GJA1/GJA5/GLRA1/GPER1/GSN/HAND2/HEY2/HMOX1/HRC/IGF1/IGFBP5/IL1B/IL6ST/KCNE3/KCNE4/KCNJ12/KCNJ2/KCNN2/KCNQ1/LMCD1/LMOD1/LMOD3/MYH4/MYL1/MYL3/MYL4/MYL9/MYLK/MYOCD/MYOF/MYOZ1/NEUROG1/NFATC1/NMUR1/NMUR2/NOS3/NPNT/P2RX1/P2…	104
196	Up	GO:0002687	positive regulation of leukocyte migration	48/2245	149/18888	0.322148	2.71035	7.69799	4.00998e-11	1.1809e-09	7.1499e-10	AIF1/ASCL2/BDKRB1/C3AR1/CCL3/CCL5/CCR1/CD74/CMKLR1/CSF1R/CX3CR1/CXCL12/DOCK8/EDN3/F2RL1/F7/GPSM3/ICAM1/IL1A/IL1R1/IL34/IL6R/ITGA4/LBP/LGALS3/LYVE1/MDK/MMP14/NCKAP1L/P2RY12/PGF/PLA2G7/PLVAP/PRSS56/PYCARD/RAC2/RARRES2/S100A14/SELP/SERPINE1/SPN/THBS1/TNFRSF18/TREM2/TRPV4/VEGFC/WNT5A/ZP3	48
197	Up	GO:0003176	aortic valve development	23/2245	43/18888	0.534884	4.50017	8.43916	4.23207e-11	1.23997e-09	7.5076e-10	BMP2/BMP4/CDH11/EMILIN1/GATA3/GATA4/GATA5/HEY2/HEYL/JAG1/NFATC1/NOS3/SLIT2/SLIT3/SMAD6/SNAI1/SNAI2/TBX20/TGFB1/TGFBR2/TIE1/TNFRSF1B/TWIST1	23
198	Up	GO:0046651	lymphocyte proliferation	78/2245	308/18888	0.253247	2.13066	7.3478	4.42861e-11	1.29101e-09	7.81658e-10	AHR/AIF1/ANXA1/ARG1/BMP4/CARD11/CCL5/CD180/CD28/CD300A/CD40/CD55/CD70/CD74/CD86/CEBPB/CLC/DOCK2/DOCK8/EBI3/ELF4/EPO/FGF10/FOSL2/GAL/GJA1/GPNMB/HHLA2/HLA-DMB/HLA-DPA1/HLA-DRB1/HLA-E/HLA-G/ICOSLG/IDO1/IGF1/IGF2/IHH/IL18/IL1A/IL1B/IL6ST/LEF1/LGALS3/LILRB2/LRRC32/LYN/MNDA/NCKAP1L/NFATC2/NFKBIZ/PLA2G2A/PLA2G5/PTPN6/PTPRC/PYCARD/RAC2/RIPK3/SASH3/SDC4/SH2D2A/SHH/SPN/SPTA1/SYK/TGFBR2/TICAM1/TLR4/TNFRSF1B…	78
199	Up	GO:0030595	leukocyte chemotaxis	65/2245	237/18888	0.274262	2.30746	7.4392	4.88658e-11	1.41735e-09	8.58157e-10	AIF1/ALOX5/ANXA1/ARHGEF5/C3AR1/CCL3/CCL3L3/CCL5/CCR1/CD74/CMKLR1/CSF1R/CSF3R/CX3CR1/CXCL1/CXCL12/CXCL2/CXCL3/CXCL6/CYP19A1/DPEP1/DPP4/EDN3/EDNRB/F2RL1/F7/FCER1G/FLT1/GPSM3/GREM1/IL1B/IL34/IL6R/ITGA1/ITGA9/ITGB2/LBP/LGALS3/LYN/MDK/MMP2/MMP28/NCKAP1L/NOD2/PADI2/PF4/PGF/PLA2G7/PPBP/PRSS56/RAC2/RARRES2/RIN3/S100A14/SERPINE1/SLIT2/SYK/TGFB2/THBS1/TNFAIP6/TNFRSF11A/TRPV4/VAV1/VEGFC/WNT5A	65
200	Up	GO:0070371	ERK1 and ERK2 cascade	82/2245	332/18888	0.246988	2.078	7.27812	5.49988e-11	1.58727e-09	9.61032e-10	ACKR3/ACTA2/ADCYAP1/ALOX15/ANGPT1/APELA/APOE/ATF3/AVP/BMP2/BMP4/CCL3/CCL3L3/CCL5/CCR1/CD36/CD4/CD44/CD74/CEACAM1/CHI3L1/CRYBA1/CSF1R/CTSH/DAB2/DUSP6/DUSP9/EMILIN1/EPO/F2RL1/FGA/FGB/FGF10/FGF18/FGF20/FGF23/FGF4/FGF8/FGG/FN1/FSHR/GCG/GPBAR1/GPER1/GPNMB/HAND2/HLA-DRB1/ICAM1/IGF1/IL1A/IL1B/KDR/LYN/NLRP12/NOD1/NOD2/NOX4/NPNT/NPSR1/NRP1/NTRK1/P2RY6/PDGFRA/PKHD1/PLA2G2A/PLA2G5/PTGER4/PTPN6/PTPRC/PYCARD/…	82
201	Up	GO:0032943	mononuclear cell proliferation	79/2245	315/18888	0.250794	2.11002	7.29656	5.5626e-11	1.59738e-09	9.67156e-10	ACE/AHR/AIF1/ANXA1/ARG1/BMP4/CARD11/CCL5/CD180/CD28/CD300A/CD40/CD55/CD70/CD74/CD86/CEBPB/CLC/DOCK2/DOCK8/EBI3/ELF4/EPO/FGF10/FOSL2/GAL/GJA1/GPNMB/HHLA2/HLA-DMB/HLA-DPA1/HLA-DRB1/HLA-E/HLA-G/ICOSLG/IDO1/IGF1/IGF2/IHH/IL18/IL1A/IL1B/IL6ST/LEF1/LGALS3/LILRB2/LRRC32/LYN/MNDA/NCKAP1L/NFATC2/NFKBIZ/PLA2G2A/PLA2G5/PTPN6/PTPRC/PYCARD/RAC2/RIPK3/SASH3/SDC4/SH2D2A/SHH/SPN/SPTA1/SYK/TGFBR2/TICAM1/TLR4/TNFR…	79
202	Up	GO:0009636	response to toxic substance	69/2245	260/18888	0.265385	2.23278	7.35126	6.30282e-11	1.80098e-09	1.09043e-09	ABCG2/ADH4/AHR/AKR1B10/ALB/ALDH1A1/ALOX5AP/APOA4/APOE/APOM/AQP10/ATP7B/CCL3/CCL5/CD36/CDH1/CES1/CLDN1/COL6A1/CPS1/CYP1A1/CYP1B1/DUOX2/EPHX2/FABP1/GATA6/GCH1/GPX2/GPX7/GPX8/GSTA1/GUCY2C/HBA1/HBA2/HBE1/HBG1/HBG2/HBZ/HP/INMT/LYN/MAOB/MB/MGST1/MGST2/MPO/MT1E/MT1F/MT1G/MT1H/MT1M/MT1X/MT2A/MUC2/NEFL/NOS3/NQO1/NUPR1/PON1/PON3/PTGS1/SLC17A3/SLC22A18/SLC23A1/SLC39A8/SLC47A1/SOD3/TLR2/TRPM6	69
203	Up	GO:0001655	urogenital system development	29/2245	66/18888	0.439394	3.69678	8.06044	6.65909e-11	1.89341e-09	1.14639e-09	ALOX15B/BMP4/CRIP1/CYP19A1/EPHB3/FGF10/FOXA1/FOXB1/GATA2/GLI1/HOXA10/HOXA11/HOXA13/HOXA9/HOXD13/MMP2/NKX3-1/OSR1/OSR2/PAX2/PAX8/PSAPL1/RARG/SERPINF1/SHH/SULF1/TP63/WNT11/WNT5A	29
204	Up	GO:0035116	embryonic hindlimb morphogenesis	18/2245	28/18888	0.642857	5.40859	8.57397	8.47749e-11	2.39863e-09	1.45228e-09	ALX4/BMP4/FGF4/FGF8/GPC3/MSX1/MSX2/OSR1/OSR2/PITX1/RARG/RSPO2/SHH/TBX3/TBX4/TP63/TWIST1/ZBTB16	18
205	Up	GO:0035296	regulation of tube diameter	48/2245	152/18888	0.315789	2.65685	7.53253	8.78798e-11	2.46234e-09	1.49086e-09	ACE/ACTA2/ADM/ADRA1D/ADRA2B/ADRB3/AGT/AGTR1/AGTR2/APOE/ARHGAP42/AVP/AVPR1A/BDKRB2/CAV1/COMP/CPS1/DBH/ECE1/EDN3/EDNRA/EDNRB/F2RL1/FGA/FGB/FGG/FOXC1/FOXC2/GCH1/GJA5/GPER1/HTR1A/ITGA1/ITGA4/ITGA9/KNG1/MMP2/MTNR1B/NOS3/NPPB/P2RX1/P2RY2/PRKG1/SCPEP1/SERPINF2/SOD3/SVEP1/UTS2R	48
206	Up	GO:0097746	blood vessel diameter maintenance	48/2245	152/18888	0.315789	2.65685	7.53253	8.78798e-11	2.46234e-09	1.49086e-09	ACE/ACTA2/ADM/ADRA1D/ADRA2B/ADRB3/AGT/AGTR1/AGTR2/APOE/ARHGAP42/AVP/AVPR1A/BDKRB2/CAV1/COMP/CPS1/DBH/ECE1/EDN3/EDNRA/EDNRB/F2RL1/FGA/FGB/FGG/FOXC1/FOXC2/GCH1/GJA5/GPER1/HTR1A/ITGA1/ITGA4/ITGA9/KNG1/MMP2/MTNR1B/NOS3/NPPB/P2RX1/P2RY2/PRKG1/SCPEP1/SERPINF2/SOD3/SVEP1/UTS2R	48
207	Up	GO:0050679	positive regulation of epithelial cell proliferation	61/2245	219/18888	0.278539	2.34345	7.3444	9.60292e-11	2.67768e-09	1.62124e-09	ACVRL1/AGTR1/APELA/APLNR/AREG/B4GALT1/BMP4/BMP5/CAV2/CCL5/CCND1/CDH3/CLDN1/CXCL12/EGFL7/ESRP2/EYA1/FGF10/FGFBP1/GATA2/GPBAR1/GRN/HAS2/HLX/HMOX1/HPN/HSPG2/IGF1/IGF2/IHH/ITGA4/KDR/LAMB1/LAMC1/LRG1/MDK/NOD2/NRP1/ODAM/OSR1/OSR2/PAX2/PDX1/PGF/PKHD1/RREB1/RUNX2/SHH/SPINK1/STAT5A/TEK/TNFAIP3/TNFSF12/TP63/TWIST1/VEGFC/WNT2/WNT3A/WNT5A/XBP1/YAP1	61
208	Up	GO:0002703	regulation of leukocyte mediated immunity	66/2245	246/18888	0.268293	2.25724	7.28978	9.83702e-11	2.72977e-09	1.65278e-09	AHR/ARG1/BST2/C3/C4BPB/CD177/CD28/CD300A/CD55/CD84/CEACAM1/CLC/CLEC7A/CR1L/CX3CR1/CXCL6/DNASE1L3/F2RL1/FES/FOXF1/GATA2/GATA3/HFE/HLA-C/HLA-DRB1/HLA-E/HLA-G/HPX/ICAM1/IL18/IL18R1/IL1B/IL1R1/IL4R/ITGAM/ITGB2/KLRC2/LYN/MICB/MR1/NCKAP1L/NOD2/PIK3R6/PLCG2/PTPN6/PTPRC/RAC2/RIPK3/SASH3/SERPINB9/SPI1/SPN/STAT6/STXBP2/SVEP1/SYK/TGFB1/TICAM1/TLR4/TNFRSF1B/TNFSF4/TREM2/TYROBP/VAMP8/VAV1/ZP3	66
209	Up	GO:0001666	response to hypoxia	78/2245	313/18888	0.249201	2.09662	7.18519	1.02288e-10	2.82491e-09	1.71038e-09	ACE/ACVRL1/ADM/AGTRAP/AJUBA/ALAS2/ANGPT2/ANGPT4/ANGPTL4/AQP1/AQP3/ASCL2/BMP2/CA9/CAV1/CHCHD2/CLDN3/CRYAB/CXCL12/CYBB/CYP1A1/DDR2/DPP4/EDNRA/EPAS1/EPO/F7/FABP1/FAM162A/FOSL2/FZD4/GATA6/GNGT1/HK2/HMOX1/HSD11B2/HSPG2/IL1A/ITPR1/ITPR2/LOXL2/MB/MMP14/MMP2/MYOCD/NDNF/NKX3-1/P2RX2/P2RX3/PCK1/PDLIM1/PGF/PKLR/PLAT/PLAU/PLEKHN1/PLOD1/POSTN/PPARG/PTGIS/RGCC/SLC2A1/SLC2A4/SOD3/STC1/STC2/TEK/TERT/TGFB1/TGFB2/…	78
210	Up	GO:0035150	regulation of tube size	48/2245	153/18888	0.313725	2.63949	7.47826	1.13457e-10	3.11845e-09	1.88811e-09	ACE/ACTA2/ADM/ADRA1D/ADRA2B/ADRB3/AGT/AGTR1/AGTR2/APOE/ARHGAP42/AVP/AVPR1A/BDKRB2/CAV1/COMP/CPS1/DBH/ECE1/EDN3/EDNRA/EDNRB/F2RL1/FGA/FGB/FGG/FOXC1/FOXC2/GCH1/GJA5/GPER1/HTR1A/ITGA1/ITGA4/ITGA9/KNG1/MMP2/MTNR1B/NOS3/NPPB/P2RX1/P2RY2/PRKG1/SCPEP1/SERPINF2/SOD3/SVEP1/UTS2R	48
211	Up	GO:0070372	regulation of ERK1 and ERK2 cascade	77/2245	308/18888	0.25	2.10334	7.17028	1.1443e-10	3.13027e-09	1.89527e-09	ACKR3/ACTA2/ADCYAP1/ALOX15/ANGPT1/APELA/APOE/ATF3/BMP2/BMP4/CCL3/CCL3L3/CCL5/CCR1/CD36/CD4/CD44/CD74/CEACAM1/CHI3L1/CRYBA1/CSF1R/DAB2/DUSP6/EMILIN1/EPO/F2RL1/FGA/FGB/FGF10/FGF18/FGF20/FGF23/FGF4/FGF8/FGG/FN1/FSHR/GCG/GPBAR1/GPER1/GPNMB/HAND2/HLA-DRB1/ICAM1/IGF1/IL1A/IL1B/KDR/LYN/NLRP12/NOD1/NOD2/NOX4/NPNT/NPSR1/NRP1/NTRK1/P2RY6/PDGFRA/PKHD1/PLA2G2A/PLA2G5/PTPN6/PTPRC/PYCARD/ROS1/RRAS/SERPINF2/SHC…	77
212	Up	GO:0042472	inner ear morphogenesis	38/2245	106/18888	0.358491	3.01611	7.64487	1.27554e-10	3.47284e-09	2.10268e-09	ALDH1A3/ATOH1/CLRN1/COL2A1/CTHRC1/EYA1/FGF10/FGF8/FRZB/FZD6/GATA2/GATA3/GBX2/GRHL3/HOXA1/HPN/ITGA8/KCNQ1/LRIG3/MYO7A/NEUROG1/OTOP1/PAX2/PAX8/POU4F3/PRRX1/PTK7/SIX1/SIX4/SLC44A4/TBX18/TBX2/TBX3/TFAP2A/USH1C/WNT1/WNT3A/WNT5A	38
213	Up	GO:0003180	aortic valve morphogenesis	21/2245	38/18888	0.552632	4.64949	8.2707	1.31589e-10	3.56588e-09	2.15901e-09	BMP4/CDH11/EMILIN1/GATA3/GATA4/GATA5/HEY2/HEYL/JAG1/NFATC1/NOS3/SLIT2/SLIT3/SMAD6/SNAI1/SNAI2/TBX20/TGFB1/TGFBR2/TIE1/TWIST1	21
214	Up	GO:1903036	positive regulation of response to wounding	32/2245	80/18888	0.4	3.36535	7.7865	1.39039e-10	3.75017e-09	2.27059e-09	ANXA1/APOH/CD36/CLDN1/CLDN3/CLDN4/CLEC7A/DDR2/DUOX2/EMILIN1/EMILIN2/F2/F7/FERMT1/FOXC2/GRN/HPSE/HRG/MDK/MYLK/OCLN/PLAT/PLAU/PLG/RREB1/SERPINE1/SERPINF2/SMOC2/THBD/THBS1/VTN/XBP1	32
215	Up	GO:0050886	endocrine process	35/2245	93/18888	0.376344	3.16632	7.6916	1.44468e-10	3.87846e-09	2.34827e-09	ACE/AGT/AGTR1/AGTR2/AQP1/AVPR1A/CGA/CTSZ/CYP19A1/DAB2/ECE1/EDN3/EDNRB/ENPEP/F2RL1/FOXD1/FZD4/GAL/GATA3/GJA1/HSD11B2/IL1B/KCNQ1/NKX3-1/NOS3/OPRK1/OR51E2/PCSK5/POMC/PPARG/RAB11FIP1/REN/SERPINF2/SUCNR1/TBX3	35
216	Up	GO:0150063	visual system development	92/2245	397/18888	0.231738	1.9497	7.02382	1.51972e-10	4.06103e-09	2.45881e-09	ACVRL1/ADAMTS18/ALDH1A2/ALDH1A3/AQP1/ARHGEF15/BARHL2/BCAR3/BIRC7/BMP4/C1QA/C3/CALB1/CDKN1C/COL4A1/COL5A1/COL5A2/COL8A2/CPAMD8/CRYAB/CRYBA1/CRYBA4/CRYBB1/CYP1A1/CYP1B1/EFEMP1/FBN1/FBN2/FGF10/FLT1/FOXC1/FOXC2/FOXF2/FREM2/FZD4/GATA3/GDF3/GJA1/GNGT1/GRHL2/GRHL3/IHH/ITGAM/JAG1/KDR/KLF4/LAMC3/LIM2/MAB21L2/MAF/MFAP2/MITF/MTNR1B/MYO7A/NEUROD4/NKD1/NRP1/OSR2/P2RY12/PAX2/PDE6A/PDGFRA/PITX2/PITX3/POU4F2/PPP…	92
217	Up	GO:0032722	positive regulation of chemokine production	30/2245	72/18888	0.416667	3.50557	7.82317	1.56964e-10	4.15594e-09	2.51627e-09	ADCYAP1/AIF1/ALOX15B/CD74/CD84/CLEC7A/CSF1R/F2RL1/HMOX1/IL18/IL1B/IL4R/IL6R/LBP/MCOLN2/NOD2/OAS1/OAS3/POSTN/PYCARD/SYK/TGFB1/TICAM1/TLR2/TLR4/TNFSF4/TRPV4/TSLP/TWIST1/WNT5A	30
218	Up	GO:0061035	regulation of cartilage development	30/2245	72/18888	0.416667	3.50557	7.82317	1.56964e-10	4.15594e-09	2.51627e-09	ACVRL1/ADAMTS12/BMP1/BMP10/BMP2/BMP4/EFEMP1/FGF18/FRZB/GDF6/GREM1/HOXA11/IHH/LOXL2/MAF/MDK/NKX3-2/PKDCC/PRKG2/PTHLH/RARG/RUNX2/SCIN/SHOX2/SIX2/SNAI2/WNT11/WNT5A/WNT9A/ZBTB16	30
219	Up	GO:1901654	response to ketone	60/2245	217/18888	0.276498	2.32628	7.21695	1.88551e-10	4.96949e-09	3.00884e-09	A2M/ACE/AHR/AQP1/AVP/AVPR1A/CA9/CAV1/CDA/CFTR/CLDN1/CLDN4/CPS1/CYBB/CYP1B1/DSG2/EPO/F5/F7/FBP1/FIBIN/GJB2/HMGCS2/HOXA10/HOXA11/HOXA13/HOXA9/HOXD13/IGFBP7/ITGAM/KLF4/MAOB/NEFL/NKX3-1/NQO1/P2RY6/PAPPA/PCK1/PCK2/POSTN/PTGDR/PTGER2/PTGER4/PTGFR/PTPRC/SCNN1A/SERPINF1/SLIT2/SLIT3/SOX10/TAT/TBX2/TGFB1/TGFB2/TGFBR3/THBS1/TLR2/TNFSF4/UGT3A2/YAP1	60
220	Up	GO:0042481	regulation of odontogenesis	14/2245	18/18888	0.777778	6.54373	8.64223	2.07822e-10	5.45249e-09	3.30128e-09	APCDD1/BMP2/BMP4/CD34/FGF8/MSX1/NGFR/PAX9/RSPO2/RUNX2/SHH/SP6/TNFRSF11B/WNT10A	14
221	Up	GO:0050920	regulation of chemotaxis	62/2245	229/18888	0.270742	2.27785	7.14543	2.41734e-10	6.31352e-09	3.82261e-09	AIF1/ANGPT2/C3AR1/CCL3/CCL5/CCR1/CD74/CMKLR1/CSF1R/CX3CR1/CXCL12/CYP19A1/DPP4/EDN3/F2RL1/F7/FGF10/FGF18/FGF4/GPSM3/GREM1/HRG/IL34/IL6R/KDR/LBP/LPAR1/LYN/MDK/MET/MMP28/NCKAP1L/NOD2/NRP1/NTF3/P2RY12/PADI2/PDGFRA/PGF/PLA2G7/POU4F2/PRSS56/RAC2/RARRES2/RIN3/S100A14/SEMA3B/SEMA3D/SEMA3G/SERPINE1/SLIT2/SMOC2/SUCNR1/TGFB1/THBS1/TNFAIP6/TPBG/TREM2/TRPV4/VEGFC/WNT3A/WNT5A	62
222	Up	GO:0003179	heart valve morphogenesis	27/2245	61/18888	0.442623	3.72395	7.82613	2.45967e-10	6.39513e-09	3.87202e-09	ADAMTS9/BMP2/BMP4/CDH11/EMILIN1/GATA3/GATA4/GATA5/GJA5/HEY2/HEYL/JAG1/NFATC1/NOS3/SLIT2/SLIT3/SMAD6/SNAI1/SNAI2/STRA6/TBX20/TBX5/TGFB1/TGFB2/TGFBR2/TIE1/TWIST1	27
223	Up	GO:1905330	regulation of morphogenesis of an epithelium	28/2245	65/18888	0.430769	3.62422	7.7837	2.50089e-10	6.47316e-09	3.91926e-09	ADAMTS12/AGT/AGTR2/BMP4/FGF10/GATA3/GDNF/GJA1/GREM1/HGF/HOXB7/HOXD13/ITGAX/LBX2/LGR4/MDK/PAX2/PAX8/SHH/SIX1/SIX2/SIX4/SNAI2/SULF1/TACSTD2/TBX2/WNT2/WNT5A	28
224	Up	GO:0030282	bone mineralization	42/2245	127/18888	0.330709	2.78237	7.40195	2.60487e-10	6.71219e-09	4.06399e-09	ACTN3/AHSG/ALOX15/ALOX5/BMP2/BMP4/CCL3/CCR1/CER1/COL1A2/COL6A1/COMP/DDR2/ENPP1/FBN2/FGF23/FOSL2/GJA1/GPC3/GREM1/IGF1/ISG15/LGR4/MGP/NOTUM/OSR1/OSR2/PHOSPHO1/PKDCC/PTH1R/PTHLH/ROR2/RSPO2/RUNX2/SGMS2/SRGN/TFAP2A/TMEM119/TWIST1/VDR/WNT10B/WNT11	42
225	Up	GO:0001837	epithelial to mesenchymal transition	54/2245	187/18888	0.28877	2.42953	7.21531	2.64048e-10	6.77371e-09	4.10123e-09	AGT/ALX1/BAMBI/BMP2/BMP4/BMP5/COL1A1/DAB2/EDNRA/FGF8/FOXA1/FOXA2/FOXC1/FOXF2/GATA3/GREM1/GSC/HAS2/HEY2/HEYL/HGF/HMGA2/HPN/IGF1/IL1B/JAG1/LEF1/LOXL2/LRG1/MDK/MSX1/MSX2/OVOL2/PHLDB2/RGCC/S100A4/SNAI1/SNAI2/SP6/TBX20/TBX3/TBX5/TGFB1/TGFB2/TGFBR2/TGFBR3/TMEM100/TWIST1/VASN/WNT11/WNT2/WNT5A/WNT8A/ZNF750	54
226	Up	GO:0010466	negative regulation of peptidase activity	43/2245	132/18888	0.325758	2.74072	7.37087	2.75665e-10	7.04044e-09	4.26273e-09	AHSG/ANXA8/ANXA8L1/AQP1/AVP/BCL2L12/CARD16/CD44/CST1/CST2/CST3/DPEP1/FABP1/FETUB/HRG/IFI16/IFI6/KLF4/KNG1/MAGEA3/PAX2/SERPINA1/SERPINA10/SERPINA12/SERPINA4/SERPINA5/SERPINA6/SERPINA7/SERPINB1/SERPINB11/SERPINB13/SERPINB7/SERPINB9/SERPIND1/SERPINE1/SERPINE3/SERPINF1/SERPINF2/SERPING1/SERPINH1/SFN/THBS1/VTN	43
227	Up	GO:0050921	positive regulation of chemotaxis	45/2245	142/18888	0.316901	2.66621	7.31969	2.96878e-10	7.54882e-09	4.57054e-09	AIF1/C3AR1/CCL3/CCL5/CCR1/CD74/CMKLR1/CSF1R/CX3CR1/CXCL12/EDN3/F2RL1/F7/FGF10/FGF18/GPSM3/IL34/IL6R/KDR/LBP/LPAR1/MDK/MET/NCKAP1L/NRP1/NTF3/P2RY12/PDGFRA/PGF/PLA2G7/PRSS56/RAC2/RARRES2/S100A14/SERPINE1/SLIT2/SMOC2/SUCNR1/TGFB1/THBS1/TPBG/TREM2/TRPV4/VEGFC/WNT5A	45
228	Up	GO:0034367	protein-containing complex remodeling	20/2245	36/18888	0.555556	4.67409	8.10394	3.20448e-10	8.1124e-09	4.91176e-09	AGT/AGTR1/APOA1/APOA2/APOA4/APOA5/APOB/APOC1/APOC3/APOE/APOM/LIPC/MPO/MTTP/NR1H4/PCSK5/PCSK6/PLA2G2A/PLA2G5/PLA2G7	20
229	Up	GO:0015711	organic anion transport	100/2245	451/18888	0.221729	1.86549	6.8325	3.36776e-10	8.48852e-09	5.13949e-09	ABCC2/ABCC3/ABCC6/ABCG2/ACE/ACSL5/AGXT/APOE/ATP8B1/AVP/AVPR1A/BDKRB2/CA4/CD36/CEACAM1/CES1/CFTR/CRABP1/CRABP2/CYB5R2/FABP1/FOLR1/FOLR2/GJA1/IL1A/IL1B/LLGL2/LRRC8E/MGST1/MTTP/NMUR2/PLA2G12B/PLA2G2A/PLA2G4A/PLA2G4F/PLA2G5/PPARG/PRKG1/RBP2/RBP5/RGS4/SLC13A2/SLC13A5/SLC16A11/SLC16A12/SLC16A3/SLC16A5/SLC17A1/SLC17A3/SLC17A9/SLC1A5/SLC22A3/SLC22A6/SLC22A7/SLC22A9/SLC23A1/SLC26A3/SLC26A7/SLC27A2/SLC27A6…	100
230	Up	GO:0030509	BMP signaling pathway	50/2245	168/18888	0.297619	2.50398	7.19146	3.77578e-10	9.47556e-09	5.73711e-09	ACVRL1/AMHR2/BAMBI/BMP10/BMP2/BMP4/BMP5/CDH5/CER1/COMP/DKK1/DLX3/DSG4/FAM83G/FBN1/FOXD1/FST/GATA4/GATA6/GDF3/GDF6/GDF7/GPC3/GREM1/HFE/HOXA13/HTRA3/KCP/KDR/LEF1/MSX1/MSX2/PCSK6/PPARG/RBPMS2/RUNX2/SKOR2/SLC39A5/SMAD6/SOST/SOSTDC1/SULF1/TBX20/TFAP2B/TGFBR3/TMEM100/TMPRSS6/TNFAIP6/WNT1/WNT5A	50
231	Up	GO:0036293	response to decreased oxygen levels	79/2245	327/18888	0.24159	2.03259	6.91789	3.82623e-10	9.56061e-09	5.7886e-09	ACE/ACVRL1/ADM/AGTRAP/AJUBA/ALAS2/ANGPT2/ANGPT4/ANGPTL4/AQP1/AQP3/ASCL2/BMP2/CA9/CAV1/CHCHD2/CLDN3/COL6A1/CRYAB/CXCL12/CYBB/CYP1A1/DDR2/DPP4/EDNRA/EPAS1/EPO/F7/FABP1/FAM162A/FOSL2/FZD4/GATA6/GNGT1/HK2/HMOX1/HSD11B2/HSPG2/IL1A/ITPR1/ITPR2/LOXL2/MB/MMP14/MMP2/MYOCD/NDNF/NKX3-1/P2RX2/P2RX3/PCK1/PDLIM1/PGF/PKLR/PLAT/PLAU/PLEKHN1/PLOD1/POSTN/PPARG/PTGIS/RGCC/SLC2A1/SLC2A4/SOD3/STC1/STC2/TEK/TERT/TGFB1…	79
232	Up	GO:0018212	peptidyl-tyrosine modification	69/2245	271/18888	0.254613	2.14215	6.95546	4.51724e-10	1.12159e-08	6.79083e-09	AGT/ANGPT1/ANGPT4/AREG/CAV1/CBLC/CCL5/CD300A/CD36/CD4/CD40/CD44/CD74/CSF1R/CSPG4/DDR2/EFEMP1/EHD4/ENPP2/EPHA1/EPO/FES/FGF10/FGF8/FLT1/GH1/GHR/GPRC5A/GREM1/HCK/HCLS1/HGF/HPX/HRG/IGF1/IL11/IL18/IL31RA/IL34/IL6R/IL6ST/ITGA5/ITGB2/KDR/LCK/LTK/LYN/MVP/NOD2/NOX4/NRP1/NTF3/NTRK1/PDGFRA/PECAM1/PKDCC/PLCG2/PTPN6/PTPRC/SOCS1/SPINK1/SYK/TGFB1/TNFRSF18/TPST2/TREM2/TSLP/VTN/ZAP70	69
233	Up	GO:1903131	mononuclear cell differentiation	105/2245	484/18888	0.216942	1.82521	6.75471	4.52756e-10	1.12159e-08	6.79083e-09	ANXA1/ASCL2/BATF2/BMP4/CARD11/CD28/CD3D/CD3G/CD4/CD74/CD79B/CD86/CDH17/CEBPB/CMTM7/CSF1R/DOCK2/F2RL1/FCER1G/FES/FGL2/FOSL2/GATA3/HHEX/HLA-DOA/HLA-DRB1/HLA-G/HLX/HOXA7/ID2/IFI16/IHH/IL11/IL18/IL18R1/IL1A/IL1B/IL2RG/IL31RA/IL34/IL4R/IL6R/IRF8/ITGA4/ITGB6/ITM2A/LCK/LEF1/LEPR/LGALS1/LILRB2/LTBR/LYL1/LYN/MDK/MMP14/MR1/MT1G/NCKAP1L/NFATC1/NFKBIZ/NKX2-3/NTRK1/ONECUT1/PCK1/PIK3R6/PLCG2/PPARG/PRDM1/PRTN3/…	105
234	Up	GO:0042730	fibrinolysis	17/2245	27/18888	0.62963	5.2973	8.20671	4.63266e-10	1.14272e-08	6.91878e-09	ANXA2/APOH/F11/F2/FGA/FGB/FGG/HRG/PLAT/PLAU/PLG/SERPINE1/SERPINF2/SERPING1/THBD/THBS1/VTN	17
235	Up	GO:0097530	granulocyte migration	47/2245	154/18888	0.305195	2.56771	7.17441	4.98933e-10	1.22546e-08	7.41975e-09	ANXA1/C3AR1/CCL3/CCL3L3/CCL5/CD177/CD300A/CD74/CMKLR1/CSF1R/CSF3R/CXCL1/CXCL2/CXCL3/CXCL6/DPEP1/DPP4/EDN3/FCER1G/IL1A/IL1B/IL1R1/IL34/ITGA1/ITGA9/ITGB2/LBP/LGALS3/MCOLN2/MDK/NCKAP1L/NOD2/PECAM1/PF4/PPBP/PRTN3/PTGER4/RAC2/RARRES2/S100A14/SLIT2/SYK/TGFB2/THBS1/TNFAIP6/TRPV4/VAV1	47
236	Up	GO:0060070	canonical Wnt signaling pathway	78/2245	323/18888	0.241486	2.03171	6.86887	5.04589e-10	1.2341e-08	7.47205e-09	APOE/BAMBI/BMP2/CAV1/CDH3/COL1A1/COL6A1/CTHRC1/DAAM2/DAB2/DKK1/DKK2/EDNRA/EDNRB/FERMT1/FGF10/FOLR1/FOXD1/FOXO1/FRZB/FZD10/FZD4/FZD6/GLI1/GPC3/GPC5/GREM1/HHEX/IGFBP4/IGFBP6/KLF4/LEF1/LGR4/LGR5/LGR6/LRRK2/MDK/NID1/NKD1/NKD2/NOTUM/PLEKHA4/PTK7/RARG/RBMS3/RSPO1/RSPO2/RSPO3/SFRP5/SHH/SHISA3/SNAI1/SNAI2/SOST/SOSTDC1/SOX10/SOX13/SOX17/SULF2/TBX18/TCF7/TCF7L1/TGFB1/TMEM88/TPBG/WLS/WNT1/WNT10A/WNT10B/WNT1…	78
237	Up	GO:0021675	nerve development	35/2245	97/18888	0.360825	3.03575	7.3826	5.54242e-10	1.34983e-08	8.1727e-09	ACKR3/ATP8B1/DRGX/ECE1/EDNRA/EGR2/ERBB3/HOXA1/HOXA3/HOXB1/HOXB2/HOXB3/HOXD3/ITGA4/LPAR1/NAV2/NEUROG1/NGF/NGFR/NRP1/NRTN/NTF3/NTF4/NTRK1/PAX2/PHOX2A/PHOX2B/POU4F1/POU4F3/SIX1/SIX4/SULF1/SULF2/TCIRG1/TFAP2A	35
238	Up	GO:0003208	cardiac ventricle morphogenesis	29/2245	71/18888	0.408451	3.43644	7.55413	5.5938e-10	1.35094e-08	8.17944e-09	BMP10/DSP/EDNRA/FOXC1/FOXC2/FOXF1/FOXH1/GATA3/GATA4/GRHL2/HAND1/HAND2/HEY2/HEYL/JAG1/MYL3/PKP2/POU4F1/PPP1R13L/TBX20/TBX5/TGFB1/TGFB2/TGFBR2/TGFBR3/TNNC1/TNNI1/TNNT2/TPM1	29
239	Up	GO:0032835	glomerulus development	29/2245	71/18888	0.408451	3.43644	7.55413	5.5938e-10	1.35094e-08	8.17944e-09	ACTA2/AGTR2/ANGPT1/ANGPT2/AQP1/BMP4/CD34/EDNRA/EDNRB/ENPEP/FOXC1/FOXC2/HEYL/IL6R/JAG1/LGR4/NID1/NPHS1/OSR1/PAX2/PDGFRA/PECAM1/PODXL/SERPINB7/SULF1/SULF2/TCF21/TEK/WT1	29
240	Up	GO:0002065	columnar/cuboidal epithelial cell differentiation	41/2245	125/18888	0.328	2.75958	7.24916	5.62874e-10	1.35371e-08	8.19623e-09	AGR2/BMP2/BMP4/BMP5/CAV1/CDX2/CEBPB/DLX3/FGF8/FOXA1/FST/GATA2/GATA4/GATA5/GATA6/GJA1/HOXA5/IL31RA/IL6ST/JAG1/KLF4/KLF5/LEF1/LHX3/MSX1/NKX3-2/NKX6-1/NR5A2/ONECUT1/PDX1/PGR/PRDM1/RARG/RFX6/ROS1/SERPINE1/TGFB1/TP63/WNT11/WNT5A/YAP1	41
241	Up	GO:0003229	ventricular cardiac muscle tissue development	26/2245	59/18888	0.440678	3.70758	7.65012	5.94125e-10	1.42026e-08	8.59918e-09	ADAMTS9/BMP10/COL14A1/DSG2/DSP/EDNRA/FOXC1/FOXC2/FOXH1/HAND1/HEY2/ID2/IRX3/MYL3/PKP2/POU4F1/PPP1R13L/TBX3/TBX5/TGFB1/TGFB2/TGFBR3/TNNC1/TNNI1/TNNT2/TPM1	26
242	Up	GO:0007229	integrin-mediated signaling pathway	38/2245	111/18888	0.342342	2.88025	7.29689	5.95467e-10	1.42026e-08	8.59918e-09	ADAM11/ADAMTS1/ANGPTL3/APOA1/CD177/CDH17/CEACAM1/COL3A1/FERMT1/FN1/HCK/ISG15/ITGA1/ITGA11/ITGA4/ITGA5/ITGA8/ITGA9/ITGAL/ITGAM/ITGAX/ITGB2/ITGB4/ITGB5/ITGB6/ITGB7/LAMA2/LAMA5/LAMB1/LAMC1/LIMS2/NID1/NRP1/PLEK/SYK/TEC/TLN1/VAV1	38
243	Up	GO:0030879	mammary gland development	43/2245	135/18888	0.318519	2.67981	7.19393	6.126e-10	1.45511e-08	8.81019e-09	AREG/ATP7B/BMP4/CAV1/CCND1/CEBPB/CSF1R/CYP19A1/ELF3/FGF10/FOXB1/FOXF1/GATA3/GJA1/HK2/HOXA5/HOXA9/HOXB9/HOXD9/ID2/IGFBP5/IRF6/LEF1/MSX1/MSX2/OAS2/ORAI1/PGR/RREB1/SLC6A3/SOSTDC1/STAT5A/STAT6/TBX2/TBX3/TGFBR2/TNFRSF11A/VDR/WNT2/WNT3A/WNT5A/XBP1/ZBTB7B	43
244	Up	GO:0016485	protein processing	64/2245	245/18888	0.261224	2.19778	6.93066	6.24224e-10	1.47665e-08	8.94056e-09	ACE/ADAMTS2/AEBP1/ANXA2/APOH/BACE2/BCL2L12/BMP1/CARD16/CASP4/CCBE1/COMP/CPM/CPN1/CPZ/CTSE/CTSH/CTSZ/DHH/DPP4/ECE1/ENPEP/F11/F7/FGA/FGB/FGG/GRIN2A/GSN/HPN/IFI16/IHH/IL1R2/KLK6/LRRK2/MAGEA3/MEP1A/MME/MMP14/MYRF/NKD2/NLRP7/PCSK5/PCSK6/PCSK9/PERP/PLA2G7/PLAT/PLAU/PRSS12/PRSS3/REN/RUNX1/S100A10/SERPINE1/SERPINF2/SHH/SPON1/SRGN/THBD/THBS1/TLL1/TMPRSS2/TMPRSS4	64
245	Up	GO:0007498	mesoderm development	44/2245	140/18888	0.314286	2.6442	7.17158	6.2741e-10	1.47813e-08	8.94952e-09	APELA/BMP4/CER1/DKK1/ETS2/EYA1/EYA2/FGF8/FOXC1/FOXC2/FOXF1/FOXH1/GDF3/GJA1/HAND1/HCK/HMGA2/HOXA11/IRX3/ITGA8/ITGB4/KLF4/LEF1/MIXL1/OSR1/OVOL1/PAX2/POU4F1/SECTM1/SHH/SIX2/SNAI1/TAL1/TBX20/TBX3/TCF15/TIE1/TLX2/TP63/WLS/WNT11/WNT3A/WNT5A/YAP1	44
246	Up	GO:0070482	response to oxygen levels	83/2245	354/18888	0.234463	1.97262	6.78479	6.60041e-10	1.54868e-08	9.37671e-09	ACE/ACVRL1/ADM/AGTRAP/AJUBA/ALAS2/ANGPT2/ANGPT4/ANGPTL4/AQP1/AQP3/ASCL2/BMP2/CA9/CAV1/CHCHD2/CLDN3/COL1A1/COL6A1/CRYAB/CXCL12/CYBB/CYP1A1/DDR2/DPP4/EDNRA/EPAS1/EPO/F7/FABP1/FAM162A/FOSL2/FOXO1/FZD4/GATA6/GNGT1/HK2/HMOX1/HSD11B2/HSPG2/IL1A/ITPR1/ITPR2/LOXL2/LPAR1/MB/MMP14/MMP2/MYOCD/NDNF/NKX3-1/P2RX2/P2RX3/PCK1/PDLIM1/PGF/PKLR/PLAT/PLAU/PLEKHN1/PLOD1/POSTN/POU4F2/PPARG/PTGIS/RGCC/SLC2A1/SLC2A4/SOD…	83
247	Up	GO:0002699	positive regulation of immune effector process	66/2245	257/18888	0.256809	2.16063	6.88044	7.32063e-10	1.71072e-08	1.03578e-08	ANXA1/ARG1/C3/CD177/CD244/CD28/CD300A/CD36/CD55/CD74/CD86/CLEC7A/DHX58/ENPP3/F2RL1/FCN1/GATA2/GATA3/HFE/HLA-C/HLA-DMB/HLA-DRB1/HLA-E/HLA-G/HLX/HPX/IL18/IL18R1/IL1B/IL1R1/IL4R/ITGAM/ITGB2/KLRC2/LAPTM5/LBP/MBL2/MICB/MR1/NFKBIZ/NOD1/NOD2/PCK1/PLA2G5/PLCG2/PTPN6/PTPRC/PYCARD/RBP4/SASH3/SPI1/SPON2/STAT6/SYK/TGFB1/TICAM1/TLR4/TNFSF4/TREM2/TRIM6/TYROBP/VAMP8/VAV1/WNT5A/XBP1/ZP3	66
248	Up	GO:0018108	peptidyl-tyrosine phosphorylation	68/2245	269/18888	0.252788	2.1268	6.83625	8.38193e-10	1.95083e-08	1.18116e-08	AGT/ANGPT1/ANGPT4/AREG/CAV1/CBLC/CCL5/CD300A/CD36/CD4/CD40/CD44/CD74/CSF1R/CSPG4/DDR2/EFEMP1/EHD4/ENPP2/EPHA1/EPO/FES/FGF10/FGF8/FLT1/GH1/GHR/GPRC5A/GREM1/HCK/HCLS1/HGF/HPX/HRG/IGF1/IL11/IL18/IL31RA/IL34/IL6R/IL6ST/ITGA5/ITGB2/KDR/LCK/LTK/LYN/MVP/NOD2/NOX4/NRP1/NTF3/NTRK1/PDGFRA/PECAM1/PKDCC/PLCG2/PTPN6/PTPRC/SOCS1/SPINK1/SYK/TGFB1/TNFRSF18/TREM2/TSLP/VTN/ZAP70	68
249	Up	GO:0007492	endoderm development	32/2245	85/18888	0.376471	3.16738	7.35539	8.71212e-10	2.01953e-08	1.22275e-08	APELA/BMP4/COL12A1/COL5A1/COL5A2/COL6A1/DKK1/FGF8/FN1/GATA4/GATA6/GDF3/HMGA2/HNF1B/HOXC11/ITGA4/ITGA5/ITGB2/ITGB5/LAMB1/LAMB3/LAMC1/MIXL1/MMP14/MMP2/NANOG/ONECUT1/PAX9/POU5F1/SOX17/TBX20/VTN	32
250	Up	GO:0030278	regulation of ossification	40/2245	122/18888	0.327869	2.75848	7.15658	9.22175e-10	2.12912e-08	1.2891e-08	ACTN3/AHSG/ALOX5/BMP2/BMP4/CCL3/CCR1/COMP/DDR2/DKK1/EGR2/ENPP1/FBN2/FGF23/GDF10/GJA1/GREM1/ISG15/KREMEN2/MDK/MGP/NOTUM/OSR1/OSR2/PHOSPHO1/PKDCC/PTGER4/RUNX2/SGMS2/SIX2/SMAD6/SOST/SRGN/TFAP2A/TMEM119/TWIST1/VDR/WNT10B/WNT5A/ZBTB16	40
251	Up	GO:0034329	cell junction assembly	99/2245	453/18888	0.218543	1.83868	6.63588	9.43945e-10	2.1707e-08	1.31428e-08	ABI3/ACE/ACTN3/ACVRL1/AGT/AJUBA/AMIGO2/APLNR/ARHGAP6/ARHGEF15/CAV1/CD9/CDH1/CDH11/CDH15/CDH17/CDH19/CDH3/CDH5/CDH6/CLDN1/CLDN11/CLDN14/CLDN18/CLDN19/CLDN23/CLDN3/CLDN4/CLDN5/CLDN6/CLDN7/CLDN9/CNTN5/COL17A1/CRB3/DKK1/DLC1/EPHB3/F11R/FMN1/FN1/FRMPD2/GJA1/GJA5/GJB1/GJB2/GJB6/GPBAR1/GREM1/GRHL2/HRG/IL1B/IL1RAP/ILDR1/IRX3/ITGA5/ITGB4/KDR/LAMC1/LIM2/LSR/MARVELD2/MARVELD3/MMP14/MUSK/NPHS1/NR1H4/NRP1/NTR…	99
252	Up	GO:0003151	outflow tract morphogenesis	31/2245	81/18888	0.382716	3.21993	7.35353	9.90085e-10	2.26777e-08	1.37305e-08	BMP4/CLDN5/EDNRA/EYA1/FGF8/FOLR1/FOXC1/FOXC2/FOXH1/GATA6/GJA5/HAND2/HEY2/HEYL/JAG1/MSX2/NRP1/PITX2/SIX1/SMAD6/SOX17/SOX18/TBX2/TBX20/TBX3/TGFB2/TGFBR2/TGFBR3/TWIST1/WNT11/WNT5A	31
253	Up	GO:1903557	positive regulation of tumor necrosis factor superfamily cytokine production	38/2245	113/18888	0.336283	2.82927	7.16311	1.0669e-09	2.43406e-08	1.47374e-08	CCL3/CD36/CD84/CD86/CLEC7A/CYBA/CYBB/FCGR2A/HLA-E/IL1A/LBP/LRRK2/NOD1/NOD2/OAS1/OAS2/OAS3/ORM1/ORM2/PF4/PLCG2/PTPRC/PYCARD/SASH3/SPN/SPON2/SYK/TGFB1/THBS1/TICAM1/TLR1/TLR2/TLR4/TMEM106A/TNFRSF8/TWIST1/TYROBP/WNT5A	38
254	Up	GO:0042303	molting cycle	39/2245	118/18888	0.330508	2.78069	7.12641	1.14597e-09	2.59393e-08	1.57053e-08	ALX4/APCDD1/CDH3/COL6A1/DKK1/DLX3/DSG4/EDAR/EPS8L3/FA2H/FERMT1/FGF10/FOXI3/FOXQ1/FST/FZD6/GAL/HPSE/IGFBP5/KRT16/LAMA5/LGR4/LGR5/MSX2/NGFR/PPP1R13L/SHH/SNAI1/SOSTDC1/SOX18/TERT/TGFB2/TNFRSF19/TP63/TRADD/TRPV3/WNT10A/WNT10B/WNT5A	39
255	Up	GO:0042633	hair cycle	39/2245	118/18888	0.330508	2.78069	7.12641	1.14597e-09	2.59393e-08	1.57053e-08	ALX4/APCDD1/CDH3/COL6A1/DKK1/DLX3/DSG4/EDAR/EPS8L3/FA2H/FERMT1/FGF10/FOXI3/FOXQ1/FST/FZD6/GAL/HPSE/IGFBP5/KRT16/LAMA5/LGR4/LGR5/MSX2/NGFR/PPP1R13L/SHH/SNAI1/SOSTDC1/SOX18/TERT/TGFB2/TNFRSF19/TP63/TRADD/TRPV3/WNT10A/WNT10B/WNT5A	39
256	Up	GO:0032642	regulation of chemokine production	36/2245	104/18888	0.346154	2.91232	7.18219	1.18454e-09	2.67077e-08	1.61706e-08	ADCYAP1/AIF1/ALOX15B/CD74/CD84/CLEC7A/CSF1R/CXCL6/F2RL1/HMOX1/IL18/IL1B/IL4R/IL6R/KLF4/LBP/MCOLN2/NOD2/NR1H4/OAS1/OAS3/POSTN/PYCARD/SIGIRR/SNAI2/SYK/TGFB1/TICAM1/TLR2/TLR4/TNFSF4/TREM2/TRPV4/TSLP/TWIST1/WNT5A	36
257	Up	GO:0002688	regulation of leukocyte chemotaxis	40/2245	123/18888	0.325203	2.73605	7.09439	1.21125e-09	2.72037e-08	1.64708e-08	AIF1/C3AR1/CCL3/CCL5/CCR1/CD74/CMKLR1/CSF1R/CX3CR1/CXCL12/CYP19A1/DPP4/EDN3/F2RL1/F7/GPSM3/GREM1/IL34/IL6R/LBP/LYN/MDK/MMP28/NCKAP1L/NOD2/PADI2/PGF/PLA2G7/PRSS56/RAC2/RARRES2/RIN3/S100A14/SERPINE1/SLIT2/THBS1/TNFAIP6/TRPV4/VEGFC/WNT5A	40
258	Up	GO:0003015	heart process	66/2245	260/18888	0.253846	2.1357	6.77237	1.22965e-09	2.75099e-08	1.66563e-08	ACE/ACTC1/ADM/ADM2/ADORA3/AGT/AGTR2/APELA/ATP2A3/AVPR1A/BMP10/CAV1/CHRM2/CTNNA3/CYP2J2/DES/DSC2/DSG2/DSP/EDN3/EDNRA/EDNRB/EPAS1/GATA4/GATA6/GCH1/GJA1/GJA5/GSN/HEY2/HRC/HSPB7/IRX3/KCNE3/KCNE4/KCNG2/KCNH6/KCNJ12/KCNJ2/KCNN2/KCNQ1/MYL3/MYL4/MYL7/NOS3/NOX4/PKP2/PPP1R13L/RGS4/S100A1/SCN10A/SCN4A/SCN7A/SHOX2/STC1/TBX18/TBX2/TBX5/TGFB2/THRB/TNNC1/TNNI1/TNNT2/TPM1/TRDN/YAP1	66
259	Up	GO:0060047	heart contraction	64/2245	249/18888	0.257028	2.16247	6.78179	1.27198e-09	2.83469e-08	1.7163e-08	ACE/ACTC1/ADM/ADM2/ADORA3/AGT/AGTR2/APELA/ATP2A3/AVPR1A/BMP10/CAV1/CHRM2/CTNNA3/CYP2J2/DES/DSC2/DSG2/DSP/EDN3/EDNRA/EDNRB/EPAS1/GATA4/GATA6/GCH1/GJA1/GJA5/GSN/HEY2/HRC/HSPB7/IRX3/KCNE3/KCNE4/KCNG2/KCNH6/KCNJ12/KCNJ2/KCNN2/KCNQ1/MYL3/MYL4/MYL7/NOS3/PKP2/PPP1R13L/RGS4/S100A1/SCN10A/SCN4A/SCN7A/SHOX2/STC1/TBX18/TBX2/TBX5/TGFB2/THRB/TNNC1/TNNI1/TNNT2/TPM1/TRDN	64
260	Up	GO:0032760	positive regulation of tumor necrosis factor production	37/2245	109/18888	0.33945	2.85591	7.13688	1.30905e-09	2.90609e-08	1.75953e-08	CCL3/CD36/CD84/CLEC7A/CYBA/CYBB/FCGR2A/HLA-E/IL1A/LBP/LRRK2/NOD1/NOD2/OAS1/OAS2/OAS3/ORM1/ORM2/PF4/PLCG2/PTPRC/PYCARD/SASH3/SPN/SPON2/SYK/TGFB1/THBS1/TICAM1/TLR1/TLR2/TLR4/TMEM106A/TNFRSF8/TWIST1/TYROBP/WNT5A	37
261	Up	GO:0031099	regeneration	55/2245	200/18888	0.275	2.31367	6.85955	1.32509e-09	2.93043e-08	1.77427e-08	ACE/ADM/ANGPT2/ANXA3/APOA2/APOA4/APOA5/B4GALNT2/CAPN3/CCND1/CD9/CEBPB/CLDN1/COL6A1/CPQ/CXCL12/EPPK1/F7/FGF10/FIGNL2/FOLR1/GATA4/GJA1/GLI1/GRN/HSPG2/IGF1/IHH/KLF4/KLF5/KLK6/LCP1/LGR6/MDK/MMP2/MYOZ1/NEFL/NNMT/PDX1/PLG/POSTN/PRRX1/PTPN3/RUNX1/SERPINA10/SGCA/SULF2/TEC/TGFBR3/TM4SF4/TXK/VTN/WNT1/WNT10B/YAP1	55
262	Up	GO:0048557	embryonic digestive tract morphogenesis	13/2245	17/18888	0.764706	6.43375	8.23191	1.37018e-09	3.00714e-08	1.82071e-08	FGF10/FOXF1/HLX/HNF1B/ID2/IHH/OVOL2/PDGFRA/RBPMS2/SHH/SHOX2/SIX2/TCF21	13
263	Up	GO:0032330	regulation of chondrocyte differentiation	24/2245	53/18888	0.45283	3.80982	7.5233	1.37541e-09	3.00714e-08	1.82071e-08	ACVRL1/ADAMTS12/BMP4/EFEMP1/FGF18/GDF6/GREM1/HOXA11/IHH/LOXL2/MAF/MDK/NKX3-2/PKDCC/PRKG2/PTHLH/RARG/RUNX2/SCIN/SHOX2/SIX2/SNAI2/WNT9A/ZBTB16	24
264	Up	GO:0060688	regulation of morphogenesis of a branching structure	24/2245	53/18888	0.45283	3.80982	7.5233	1.37541e-09	3.00714e-08	1.82071e-08	AGT/AGTR2/BMP4/FGF10/GDNF/GREM1/HGF/HOXB7/HOXD13/LGR4/LRRK2/MDK/PAX2/PAX8/SHH/SHOX2/SIX1/SIX2/SIX4/SNAI2/SULF1/TACSTD2/WNT2/WNT5A	24
265	Up	GO:0050764	regulation of phagocytosis	35/2245	100/18888	0.35	2.94468	7.16112	1.42974e-09	3.11413e-08	1.88549e-08	AHSG/ALOX15/APOA1/APOA2/C3/C4B/CD300A/CD36/CLEC7A/CYBA/DOCK2/DYSF/F2RL1/FCER1G/FCGR2A/FCN1/GATA2/HCK/IL2RB/IL2RG/MBL2/NCKAP1L/NOD2/PLA2G5/PLCG2/PLSCR1/PRTN3/PTPRC/PYCARD/SPHK1/SYK/TGM2/TLR2/TREM2/TULP1	35
266	Up	GO:0030111	regulation of Wnt signaling pathway	80/2245	342/18888	0.233918	1.96804	6.6352	1.50561e-09	3.26707e-08	1.97809e-08	ALPK2/APCDD1/APCDD1L/APOE/BAMBI/BMP2/CAV1/CDH3/COL1A1/CTHRC1/DAAM2/DAB2/DCDC2/DKK1/DKK2/FERMT1/FGF10/FOLR1/FOXL1/FOXO1/FRZB/FZD6/GLI1/GPC3/GPC5/GREM1/GSC/HHEX/HIC1/HNF1B/IGFBP4/IGFBP6/LBX2/LEF1/LGR4/LGR5/LGR6/LRRK2/MDFI/MDK/NKD1/NKD2/NOTUM/PLEKHA4/PTK7/RBMS3/RNF43/RSPO1/RSPO2/RSPO3/RSPO4/SFRP5/SHH/SHISA3/SNAI2/SOST/SOSTDC1/SOX10/SOX13/SOX17/SULF1/SULF2/TAX1BP3/TBX18/TCF7L1/TERT/TGFB1/TLR2/TMEM88/…	80
267	Up	GO:0032602	chemokine production	36/2245	105/18888	0.342857	2.88458	7.11215	1.59802e-09	3.45459e-08	2.09163e-08	ADCYAP1/AIF1/ALOX15B/CD74/CD84/CLEC7A/CSF1R/CXCL6/F2RL1/HMOX1/IL18/IL1B/IL4R/IL6R/KLF4/LBP/MCOLN2/NOD2/NR1H4/OAS1/OAS3/POSTN/PYCARD/SIGIRR/SNAI2/SYK/TGFB1/TICAM1/TLR2/TLR4/TNFSF4/TREM2/TRPV4/TSLP/TWIST1/WNT5A	36
268	Up	GO:0006936	muscle contraction	82/2245	355/18888	0.230986	1.94337	6.59017	1.77645e-09	3.826e-08	2.31651e-08	ACTA2/ACTN3/ADRA2B/ARHGAP42/BDKRB2/BMP10/CAV1/CHRM2/CHRNA1/CHRND/CHRNG/CNN1/COMP/CRYAB/CTNNA3/DES/DSC2/DSG2/DSP/EDN3/EDNRA/EDNRB/GATA4/GDNF/GJA1/GJA5/GLRA1/GPER1/GSN/HRC/KCNE3/KCNE4/KCNJ12/KCNJ2/KCNN2/KCNQ1/LMOD1/LMOD3/MYH4/MYL1/MYL3/MYL4/MYL9/MYLK/MYOCD/MYOF/NEUROG1/NMUR1/NMUR2/NPNT/P2RX1/P2RX2/P2RX3/P2RX6/PKP2/PPP1R13L/PRKG1/RCSD1/SCN10A/SCN4A/SCN7A/SGCA/SMPX/SNTB1/SPHK1/SSPN/STC1/SULF1/SULF2/T…	82
269	Up	GO:0043542	endothelial cell migration	70/2245	286/18888	0.244755	2.05921	6.6292	2.10916e-09	4.52568e-08	2.74013e-08	ACVRL1/ADAMTS9/ADTRP/AGT/AGTR2/ANGPT1/ANGPT2/ANGPT4/ANXA1/ANXA3/APOA1/APOE/APOH/BMP10/CARD10/CCBE1/CD40/CDH5/CEACAM1/CLEC14A/CYP1B1/DCN/DPP4/EPHB4/ETS1/FGF18/FGF4/FGFBP1/FOXC2/GATA2/GATA3/GREM1/GRN/HMOX1/HRG/ID1/KDR/KLF4/LOXL2/MEOX2/MET/NOS3/NR2F2/NRP1/PLG/PPARG/PRSS3/RGCC/RRAS/S100P/SASH1/SERPINF1/SH3BP1/SLIT2/SMOC2/SNAI2/SOX18/SP100/SPARC/SRPX2/STARD13/STAT5A/STC1/TEK/TGFB1/TGFBR3/THBS1/TNFSF12…	70
270	Up	GO:0001654	eye development	88/2245	393/18888	0.223919	1.88391	6.50355	2.33668e-09	4.99087e-08	3.02179e-08	ACVRL1/ADAMTS18/ALDH1A2/ALDH1A3/AQP1/ARHGEF15/BARHL2/BCAR3/BIRC7/BMP4/CALB1/CDKN1C/COL4A1/COL5A1/COL5A2/COL8A2/CPAMD8/CRYAB/CRYBA1/CRYBA4/CRYBB1/CYP1A1/CYP1B1/EFEMP1/FBN1/FBN2/FGF10/FLT1/FOXC1/FOXC2/FOXF2/FREM2/FZD4/GATA3/GDF3/GJA1/GNGT1/GRHL2/GRHL3/IHH/JAG1/KDR/KLF4/LAMC3/LIM2/MAB21L2/MAF/MFAP2/MITF/MTNR1B/MYO7A/NEUROD4/NKD1/NRP1/OSR2/PAX2/PDE6A/PDGFRA/PITX2/PITX3/POU4F2/PPP1R13L/PRDM1/PRSS56/RA…	88
271	Up	GO:0052547	regulation of peptidase activity	73/2245	304/18888	0.240132	2.02031	6.58681	2.34325e-09	4.99087e-08	3.02179e-08	AHSG/ANXA8/ANXA8L1/AQP1/ATP2A3/AVP/BCL2L12/BIRC3/CARD16/CASP10/CAV1/CD44/CLDN3/CLDN4/CLEC7A/CST1/CST2/CST3/CTSH/CTSV/DLC1/DPEP1/FABP1/FAM162A/FETUB/GPER1/GRIN2A/GRN/GSN/HRG/IFI16/IFI6/KLF4/KNG1/LAPTM5/LCK/LYN/MAGEA3/NGFR/NKX3-1/NLRP1/NLRP12/NOD1/PAX2/PERP/PPARG/PRSS22/PYCARD/RCN3/SERPINA1/SERPINA10/SERPINA12/SERPINA4/SERPINA5/SERPINA6/SERPINA7/SERPINB1/SERPINB11/SERPINB13/SERPINB7/SERPINB9/SERPIN…	73
272	Up	GO:0060343	trabecula formation	16/2245	26/18888	0.615385	5.17745	7.8285	2.47975e-09	5.26218e-08	3.18606e-08	ADAMTS1/BMP10/CHAD/COL1A1/FBN2/FHL2/GREM1/HEY2/MMP2/MSX2/OVOL2/RBP4/SLC40A1/TEK/TGFBR3/WNT10B	16
273	Up	GO:1902105	regulation of leukocyte differentiation	77/2245	328/18888	0.234756	1.97509	6.54283	2.56775e-09	5.42895e-08	3.28703e-08	ANXA1/ASCL2/BMP4/C1QC/CARD11/CCL3/CCR1/CD28/CD4/CD74/CD86/CEACAM1/CEBPB/CLDN18/FBN1/FES/FGL2/GATA2/GATA3/HCLS1/HLA-DOA/HLA-DRB1/HLA-G/HLX/HOXA7/ID2/IHH/IL18/IL2RG/IL34/IL4R/LEF1/LILRB2/LYN/MDK/MITF/MMP14/NCKAP1L/NFKBIZ/PCK1/PF4/PIK3R6/POU4F1/POU4F2/PRDM1/PTPN6/PTPRC/RAG1/RHOH/ROR2/RUNX1/RUNX3/SASH3/SHH/SMARCD2/SOCS1/SOX13/SPI1/SYK/TAL1/TCF7/TGFB1/TGFBR2/TLR4/TMEM176A/TMEM176B/TNFAIP6/TNFRSF11A/TN…	77
274	Up	GO:0007548	sex differentiation	70/2245	288/18888	0.243056	2.04491	6.56288	2.89147e-09	6.09107e-08	3.68793e-08	A2M/ACE/ADAMTS1/AFP/AMHR2/BMP5/CEBPB/CGA/CYP19A1/CYP1B1/DHH/DMC1/DMRT2/EREG/FGF10/FGF8/FOXC1/FOXF2/FSHR/FST/FZD4/GAS2/GATA3/GATA4/GATA6/GJA1/HNF4A/HOXA10/HOXA11/HOXA13/HOXA9/HOXD13/HSD17B3/IL1A/IRX5/KDR/LGR4/LHX9/MMP14/MMP2/NEUROG1/NHLH2/NKX3-1/NOS3/NR2F2/NR5A1/NTRK1/NUPR1/OSR1/PDGFRA/PGR/RBP4/REN/ROR2/RXFP2/SHH/SIX4/SLIT2/SLIT3/STRA6/TBX3/TCF21/TGFB2/TNFAIP6/TP63/UTF1/WNT5A/WT1/ZFP42/ZP3	70
275	Up	GO:0006869	lipid transport	98/2245	456/18888	0.214912	1.80814	6.41585	2.90584e-09	6.09909e-08	3.69278e-08	ABCA8/ABCC2/ABCC3/ABCG2/ACE/ACSL5/AGT/AGTR1/ANO3/ANO7/ANO9/ANXA2/APOA1/APOA2/APOA4/APOA5/APOB/APOBR/APOC1/APOC3/APOE/APOH/APOL6/APOM/ATP10A/ATP8B1/BDKRB2/CAV1/CD36/CEACAM1/CES1/CFTR/CIDEC/CRABP1/CRABP2/CYP19A1/CYP8B1/DAB2/ENPP7/FABP1/FZD4/GAL/IL1A/IL1B/KCNQ1/LBP/LDLRAP1/LIPC/LRAT/MSR1/MTTP/NKX3-1/NMUR2/NPC1L1/OSBPL10/PCSK9/PCTP/PLA2G12B/PLA2G2A/PLA2G4A/PLA2G4F/PLA2G5/PLSCR1/PLSCR4/PLSCR5/POMC/PON…	98
276	Up	GO:0050777	negative regulation of immune response	53/2245	194/18888	0.273196	2.2985	6.67674	3.38341e-09	7.07574e-08	4.2841e-08	A2M/AHR/ALOX15/AMBP/ANXA1/ARG1/ASCL2/C4BPB/CD300A/CD55/CEACAM1/COL3A1/CR1L/DHX58/ENPP3/FGL2/GPR17/GRN/HCK/HFE/HLA-DRB1/HLA-E/HLA-G/HLX/IFI16/IL4R/ISG15/LGALS3/LYN/NCKAP1L/NLRC5/NMI/NOD2/OAS1/OAS3/OTOP1/PPARG/PTPN6/PTPRC/RHBDF2/SERPINB9/SERPING1/SPI1/SPN/STAT6/SVEP1/SYK/TGFB1/TNFAIP3/TNFSF4/TREM2/VSIG4/ZBTB7B	53
277	Up	GO:0045071	negative regulation of viral genome replication	24/2245	55/18888	0.436364	3.67129	7.28645	3.46039e-09	7.21061e-08	4.36576e-08	APOBEC3B/APOBEC3C/APOBEC3D/APOBEC3F/APOBEC3G/APOBEC3H/BST2/CCL5/HMGA2/IFI16/IFIT1/IFITM1/IFITM2/IFITM3/ISG15/ISG20/MX1/OAS1/OAS2/OAS3/OASL/PLSCR1/SLPI/TRIM6	24
278	Up	GO:0035270	endocrine system development	42/2245	137/18888	0.306569	2.57928	6.81367	3.53332e-09	7.3361e-08	4.44174e-08	ALDH1A2/APOA1/BMP2/BMP4/BMP5/CDH1/CDKN1C/CGA/CYP1B1/EDNRA/FGF10/FGF8/FOXA2/FOXI3/GATA2/GATA3/GATA6/GLI1/HOXA3/HOXA5/HOXB3/HOXD3/IL6R/LHX3/MDK/MNX1/NKX6-1/NR5A1/ONECUT1/PAX8/PDGFRA/PDX1/PITX1/PITX2/RFX6/SHH/SIX1/SLC6A3/STRA6/WNT11/WNT5A/WT1	42
279	Up	GO:0001942	hair follicle development	33/2245	94/18888	0.351064	2.95363	6.97381	3.8296e-09	7.92274e-08	4.79693e-08	ALX4/APCDD1/CDH3/COL6A1/DKK1/DLX3/DSG4/EDAR/FERMT1/FGF10/FOXI3/FOXQ1/FST/FZD6/GAL/HPSE/IGFBP5/LAMA5/LGR4/LGR5/MSX2/NGFR/SHH/SNAI1/SOSTDC1/SOX18/TGFB2/TNFRSF19/TP63/TRADD/WNT10A/WNT10B/WNT5A	33
280	Up	GO:0051918	negative regulation of fibrinolysis	11/2245	13/18888	0.846154	7.119	8.10555	4.05825e-09	8.36579e-08	5.06519e-08	APOH/F2/HRG/PLAT/PLAU/PLG/SERPINE1/SERPINF2/THBD/THBS1/VTN	11
281	Up	GO:1902107	positive regulation of leukocyte differentiation	52/2245	190/18888	0.273684	2.3026	6.62774	4.43526e-09	9.07769e-08	5.49621e-08	ANXA1/CCR1/CD4/CD74/CD86/FES/GATA3/HCLS1/HLA-DRB1/HLA-G/HLX/ID2/IHH/IL18/IL2RG/IL34/IL4R/LEF1/LILRB2/MDK/MMP14/NCKAP1L/NFKBIZ/PCK1/PF4/PIK3R6/POU4F1/POU4F2/PTPRC/RAG1/RHOH/ROR2/RUNX1/RUNX3/SASH3/SHH/SMARCD2/SOCS1/SOX13/SPI1/SYK/TGFB1/TGFBR2/TNFRSF11A/TNFSF4/TREM2/TYROBP/WNT10B/XBP1/ZAP70/ZBTB16/ZBTB7B	52
282	Up	GO:1903708	positive regulation of hemopoiesis	52/2245	190/18888	0.273684	2.3026	6.62774	4.43526e-09	9.07769e-08	5.49621e-08	ANXA1/CCR1/CD4/CD74/CD86/FES/GATA3/HCLS1/HLA-DRB1/HLA-G/HLX/ID2/IHH/IL18/IL2RG/IL34/IL4R/LEF1/LILRB2/MDK/MMP14/NCKAP1L/NFKBIZ/PCK1/PF4/PIK3R6/POU4F1/POU4F2/PTPRC/RAG1/RHOH/ROR2/RUNX1/RUNX3/SASH3/SHH/SMARCD2/SOCS1/SOX13/SPI1/SYK/TGFB1/TGFBR2/TNFRSF11A/TNFSF4/TREM2/TYROBP/WNT10B/XBP1/ZAP70/ZBTB16/ZBTB7B	52
283	Up	GO:0003158	endothelium development	43/2245	143/18888	0.300699	2.52989	6.74466	4.45077e-09	9.07769e-08	5.49621e-08	ACVRL1/ADAMTS12/BMP4/CD34/CDH5/CEACAM1/CLDN1/CLDN3/CLDN5/COL18A1/COL27A1/EDNRA/EDNRB/F11R/F2RL1/FOXC2/FZD4/GJA5/HEY2/HOXA13/HOXB5/HPSE/ICAM1/IL1B/ITGAX/JAG1/KDR/MARVELD2/MET/MYADM/NR2F2/NRP1/PECAM1/PROC/ROBO4/SLC40A1/SOX17/SOX18/STARD13/STC1/TIE1/TJP3/TMEM100	43
284	Up	GO:0042102	positive regulation of T cell proliferation	35/2245	104/18888	0.336538	2.83142	6.87835	4.6989e-09	9.55002e-08	5.78219e-08	AIF1/ANXA1/CARD11/CCL5/CD28/CD55/CD70/CD86/EBI3/EPO/HHLA2/HLA-DMB/HLA-DPA1/HLA-E/ICOSLG/IGF1/IGF2/IL18/IL1A/IL1B/IL6ST/LILRB2/NCKAP1L/PTPRC/PYCARD/SASH3/SHH/SPN/SPTA1/SYK/TGFBR2/TNFSF4/VTCN1/ZAP70/ZP3	35
285	Up	GO:0070665	positive regulation of leukocyte proliferation	47/2245	164/18888	0.286585	2.41115	6.66605	4.89437e-09	9.91239e-08	6.00159e-08	AIF1/ANXA1/BST2/CARD11/CCL5/CD28/CD55/CD70/CD74/CD86/CSF1R/CSF2RB/EBI3/EPO/FGF10/HHLA2/HLA-DMB/HLA-DPA1/HLA-E/ICOSLG/IGF1/IGF2/IL18/IL1A/IL1B/IL34/IL6ST/LILRB2/LYN/NCKAP1L/NFATC2/PTPRC/PYCARD/RAC2/SASH3/SHH/SPN/SPTA1/SYK/TGFBR2/TICAM1/TLR4/TNFSF4/VTCN1/WNT3A/ZAP70/ZP3	47
286	Up	GO:0002526	acute inflammatory response	36/2245	109/18888	0.330275	2.77873	6.84006	5.04582e-09	1.01834e-07	6.16567e-08	A2M/AHSG/ALOX5AP/B4GALT1/C3/CD163/CEBPB/CREB3L3/DNASE1L3/EDNRB/EPO/F2/FCGR2A/FN1/HLA-E/HP/IL1A/IL1B/IL31RA/IL6R/IL6ST/LBP/MBL2/MYLK3/NUPR1/ORM1/ORM2/OSMR/PLSCR1/SERPINA1/SERPINF2/SIGIRR/SPN/TNFRSF11A/TNFSF4/ZP3	36
287	Up	GO:0060350	endochondral bone morphogenesis	25/2245	60/18888	0.416667	3.50557	7.13927	5.24159e-09	1.0505e-07	6.36041e-08	BMP4/CER1/COL13A1/COL1A1/COL27A1/COL2A1/COL3A1/COMP/FGF18/FOSL2/FOXC1/GHR/HOXA11/IHH/MMP14/PHOSPHO1/RARG/RUNX2/SERPINH1/SHOX2/STC1/TEK/TGFBR2/TMEM119/TRPV4	25
288	Up	GO:1905517	macrophage migration	25/2245	60/18888	0.416667	3.50557	7.13927	5.24159e-09	1.0505e-07	6.36041e-08	B4GALT1/C3AR1/CCL3/CCL5/CD9/CMKLR1/CSF1R/CX3CR1/CYP19A1/EDNRB/EMILIN1/IL34/LGALS3/MCOLN2/MDK/MMP14/MMP2/MMP28/P2RY12/RARRES2/ROR2/THBS1/TREM2/TRIM55/TRPV4	25
289	Up	GO:0010811	positive regulation of cell-substrate adhesion	39/2245	124/18888	0.314516	2.64614	6.75442	5.67535e-09	1.1335e-07	6.86293e-08	ABI3BP/AGR2/ALOX15/APOA1/CCDC80/CD36/CEACAM6/DAB2/ECM2/EGFL6/EGFLAM/EMILIN1/EPHA1/FBLN2/FERMT1/FGA/FGB/FGG/FMN1/FN1/FOXF1/HAS2/HRG/ITGA5/KDR/LIMS2/MDK/MYADM/NDNF/NID1/NPNT/NRP1/RRAS/RREB1/S100A10/SDC4/TEK/VIT/VTN	39
290	Up	GO:0141091	transforming growth factor beta receptor superfamily signaling pathway	86/2245	388/18888	0.221649	1.86482	6.32162	5.92335e-09	1.17895e-07	7.13812e-08	ACVRL1/AMHR2/BAMBI/BMP10/BMP2/BMP4/BMP5/CAV2/CDH3/CDH5/CDKN1C/CER1/CFC1/CLDN5/COL1A2/COL3A1/COMP/DAB2/DACT2/DKK1/DLX3/DSG4/FAM83G/FBN1/FBN2/FERMT1/FGF10/FMOD/FOLR1/FOXD1/FOXH1/FST/GATA4/GATA6/GDF10/GDF15/GDF3/GDF6/GDF7/GPC3/GREM1/HFE/HOXA13/HTRA3/ID1/ITGA8/ITGB5/ITGB6/KCP/KDR/LEF1/LRG1/LRRC32/MSX1/MSX2/MYOCD/NPNT/NRROS/ONECUT1/OVOL2/PCSK6/PPARG/RASL11B/RBPMS2/RUNX2/SKOR2/SLC39A5/SMAD6/SOST/SOSTDC…	86
291	Up	GO:0008016	regulation of heart contraction	55/2245	208/18888	0.264423	2.22469	6.52292	6.16766e-09	1.22336e-07	7.407e-08	ACE/ADM/ADM2/ADORA3/AGT/AGTR2/APELA/ATP2A3/AVPR1A/BMP10/CAV1/CHRM2/CTNNA3/CYP2J2/DES/DSC2/DSG2/DSP/EDN3/EDNRA/EDNRB/EPAS1/GATA4/GCH1/GJA1/GJA5/HEY2/HRC/HSPB7/IRX3/KCNE3/KCNE4/KCNG2/KCNH6/KCNJ12/KCNJ2/KCNN2/KCNQ1/MYL3/MYL4/NOS3/PKP2/RGS4/S100A1/SCN10A/SHOX2/STC1/TBX18/TBX2/TBX5/TGFB2/THRB/TNNT2/TPM1/TRDN	55
292	Up	GO:0002443	leukocyte mediated immunity	99/2245	469/18888	0.211087	1.77596	6.24977	6.45409e-09	1.27579e-07	7.72444e-08	ACE/AHR/ANXA3/ARG1/BST2/C1QA/C1QB/C1QC/C3/C4B/C4BPB/C7/C8A/C8B/CCL3/CD177/CD28/CD300A/CD40/CD55/CD70/CD74/CD84/CEACAM1/CLC/CLEC7A/CR1L/CSF2RB/CTSC/CTSH/CX3CR1/CXCL6/DBH/DNASE1L3/F2/F2RL1/FCER1G/FCGR2A/FES/FOXF1/GATA2/GATA3/HFE/HLA-C/HLA-DRB1/HLA-E/HLA-G/HPX/ICAM1/IL18/IL18R1/IL1B/IL1R1/IL2RB/IL4R/ITGAM/ITGB2/JAG1/KLRC2/LYN/MBL2/MICB/MILR1/MR1/MYO1G/NCKAP1L/NFKBIZ/NOD2/PIK3R6/PLCG2/PTGDR/PTGDS/PTP…	99
293	Up	GO:0003203	endocardial cushion morphogenesis	20/2245	41/18888	0.487805	4.10408	7.30765	6.52454e-09	1.28094e-07	7.75562e-08	ACVRL1/APLNR/BMP2/BMP5/FGF8/GATA5/HEY2/HEYL/MSX1/MSX2/NOS3/SNAI1/SNAI2/TBX2/TBX20/TBX3/TGFB2/TGFBR2/TMEM100/TWIST1	20
294	Up	GO:0072210	metanephric nephron development	20/2245	41/18888	0.487805	4.10408	7.30765	6.52454e-09	1.28094e-07	7.75562e-08	AGTR2/AQP1/BMP4/CD34/FMN1/FOXD1/GDNF/GREM1/IRX1/IRX2/KIF26B/LGR4/OSR1/PAX2/PAX8/PDGFRA/SIX2/TCF21/TFAP2B/WT1	20
295	Up	GO:0002695	negative regulation of leukocyte activation	52/2245	192/18888	0.270833	2.27862	6.5402	6.56144e-09	1.28382e-07	7.77305e-08	ANXA1/ARG1/ASCL2/BMP4/CD300A/CD33/CD74/CD84/CD86/CEBPB/ENPP3/FGL1/FGL2/FN1/GAL/GPER1/GPNMB/GRN/HFE/HLA-DRB1/HLA-E/HLA-G/HLX/ID2/IDO1/IHH/IL31RA/IL4R/LAPTM5/LGALS3/LILRB2/LRRC32/LYN/MDK/MILR1/MNDA/PLA2G2A/PLA2G5/PTPN6/PTPRC/RUNX1/RUNX3/SDC4/SHH/SOCS1/SPN/TNFAIP3/TNFSF4/TYROBP/VSIG4/VTCN1/ZBTB7B	52
296	Up	GO:0015850	organic hydroxy compound transport	73/2245	311/18888	0.234727	1.97484	6.36649	6.66005e-09	1.29871e-07	7.86322e-08	ABCA8/ABCC2/ABCC3/ADORA3/ADRA2B/AGT/AGTR1/ANXA2/APOA1/APOA2/APOA4/APOA5/APOB/APOC1/APOC3/APOE/APOM/AQP1/AQP10/AQP3/AQP7/ATP8B1/CAV1/CD36/CEACAM1/CES1/CFTR/CHRNA6/CXCL12/CYP19A1/CYP8B1/DAB2/ENPP7/FGF20/GAL/GDNF/HTR1A/KCNQ1/LDLRAP1/LIPC/MAOB/MSR1/MTTP/NPC1L1/OPRK1/OSBPL10/P2RX1/PCSK9/POMC/PON1/PPARG/RBP4/REN/SHH/SLC16A3/SLC18A1/SLC18A3/SLC22A3/SLC51A/SLC51B/SLC5A12/SLC6A2/SLC6A3/SLCO1A2/SLCO1B1/SLC…	73
297	Up	GO:0001894	tissue homeostasis	64/2245	259/18888	0.247104	2.07898	6.42157	6.85691e-09	1.32812e-07	8.04131e-08	ABCC6/ACP5/ALDH1A1/ANGPT1/CD34/CDH3/CDH5/CLDN1/CLDN18/CLDN3/CLDN5/CLRN1/COL14A1/COL2A1/COL3A1/COMP/CSF1R/CYTL1/F11R/FOSL2/FOXC1/GATA2/GJA1/GJB6/HOXA13/IHH/IL20RA/ILDR1/LAMA2/LAMC1/LSR/MC4R/MUC13/MUC2/MUC4/NFKBIZ/NOD2/NOS3/NOX4/NT5E/OCLN/PECAM1/PRDM14/PTH1R/RAC2/RBP4/SASH3/SLC2A1/SLC39A8/SYK/TCIRG1/TF/TFF1/TFF2/TFF3/TJP3/TLR4/TMEM119/TNFAIP3/TNFRSF11A/TNFRSF11B/TULP1/USH1C/YAP1	64
298	Up	GO:0060249	anatomical structure homeostasis	64/2245	259/18888	0.247104	2.07898	6.42157	6.85691e-09	1.32812e-07	8.04131e-08	ABCC6/ACP5/ALDH1A1/ANGPT1/CD34/CDH3/CDH5/CLDN1/CLDN18/CLDN3/CLDN5/CLRN1/COL14A1/COL2A1/COL3A1/COMP/CSF1R/CYTL1/F11R/FOSL2/FOXC1/GATA2/GJA1/GJB6/HOXA13/IHH/IL20RA/ILDR1/LAMA2/LAMC1/LSR/MC4R/MUC13/MUC2/MUC4/NFKBIZ/NOD2/NOS3/NOX4/NT5E/OCLN/PECAM1/PRDM14/PTH1R/RAC2/RBP4/SASH3/SLC2A1/SLC39A8/SYK/TCIRG1/TF/TFF1/TFF2/TFF3/TJP3/TLR4/TMEM119/TNFAIP3/TNFRSF11A/TNFRSF11B/TULP1/USH1C/YAP1	64
299	Up	GO:0009954	proximal/distal pattern formation	18/2245	34/18888	0.529412	4.45413	7.40373	7.0115e-09	1.34831e-07	8.16355e-08	ALDH1A2/FGF10/GLI1/GREM1/HOXA10/HOXA11/HOXA9/HOXB9/HOXC10/HOXC11/HOXC9/HOXD10/HOXD9/IRX1/IRX2/IRX3/OSR1/TP63	18
300	Up	GO:0090183	regulation of kidney development	18/2245	34/18888	0.529412	4.45413	7.40373	7.0115e-09	1.34831e-07	8.16355e-08	AGT/AGTR2/BMP4/FOXD1/GATA3/GDNF/GREM1/HNF1B/HOXB7/LGR4/OSR1/PAX2/PAX8/SIX1/SIX2/SIX4/TACSTD2/WT1	18
301	Up	GO:0003073	regulation of systemic arterial blood pressure	33/2245	96/18888	0.34375	2.89209	6.82599	7.03123e-09	1.34831e-07	8.16355e-08	ACE/ADM/ADM2/ADRB3/AGT/AGTR1/AGTR2/ARHGAP42/AVP/AVPR1A/CTSZ/CYP4F12/ECE1/EDN3/EDNRB/ENPEP/F2RL1/GJA5/HSD11B2/KCNK6/NAV2/NOS3/NPPB/NR2F2/OR51E2/P2RX2/PCSK5/POSTN/REN/SERPINF2/SLC2A5/SUCNR1/TPM1	33
302	Up	GO:0002718	regulation of cytokine production involved in immune response	38/2245	120/18888	0.316667	2.66423	6.71691	7.1805e-09	1.37238e-07	8.30925e-08	ACP5/ANGPT1/APOA1/APOA2/ARG1/BST2/CD36/CD55/CD74/CLC/CLEC7A/F2RL1/GATA3/HFE/HLA-E/HLA-G/IL18/IL18R1/IL1B/IL1R1/LAPTM5/NOD1/NOD2/PLCG2/PRG2/PYCARD/SASH3/SPON2/SYK/TGFB1/TGFB2/TICAM1/TLR4/TNFRSF1B/TNFSF4/TRIM6/TWIST1/WNT5A	38
303	Up	GO:0032755	positive regulation of interleukin-6 production	34/2245	101/18888	0.336634	2.83222	6.78084	7.70457e-09	1.46768e-07	8.88628e-08	AIF1/CD36/CD74/CLEC7A/CYBA/EREG/F2RL1/IL1A/IL1B/IL1RAP/IL6R/LBP/LILRB2/NOD1/NOD2/PLCG2/PYCARD/SPON2/SYK/TGFB1/TICAM1/TLR1/TLR2/TLR4/TLR6/TMEM106A/TNFSF4/TRPV4/TSLP/TWIST1/TYROBP/UNC93B1/WNT5A/XBP1	34
304	Up	GO:0002886	regulation of myeloid leukocyte mediated immunity	24/2245	57/18888	0.421053	3.54247	7.06041	8.24126e-09	1.56476e-07	9.47403e-08	ARG1/C3/CD177/CD300A/CD84/CX3CR1/CXCL6/DNASE1L3/F2RL1/FES/FOXF1/GATA2/HLA-E/IL4R/ITGAM/ITGB2/LYN/RAC2/SPI1/STXBP2/SYK/TICAM1/TYROBP/VAMP8	24
305	Up	GO:0001570	vasculogenesis	30/2245	83/18888	0.361446	3.04097	6.84406	8.88007e-09	1.68052e-07	1.01749e-07	ACKR3/ADM/APELA/APLNR/ASB4/CAV1/CD34/CEACAM1/EGFL7/FOXF1/FZD4/HAS2/HEY2/HOXA13/KDR/MYOCD/NRP1/RRAS/SHH/SOX17/SOX18/TBX20/TBX5/TGFB1/TGFBR2/TGFBR3/TIE1/TMEM100/WT1/YAP1	30
306	Up	GO:0090287	regulation of cellular response to growth factor stimulus	83/2245	373/18888	0.22252	1.87214	6.24818	9.004e-09	1.6984e-07	1.02832e-07	ACVRL1/ADAMTS12/AGT/AGTR2/BAMBI/BMP2/BMP4/CAV2/CCBE1/CDH3/CDH5/CDKN1C/CER1/CREB3L1/DCN/DKK1/EMILIN1/FBN1/FBN2/FERMT1/FGF10/FGF18/FGF4/FGFBP1/FOLR1/FOXD1/FST/FZD4/GATA3/GATA4/GATA6/GDF3/GPC3/GREM1/HHEX/HHIP/HOXA13/HRG/HTRA3/IL1B/ITGA5/ITGA8/KCP/KDR/LRG1/MSX1/MSX2/MYOCD/NGFR/NPNT/NRP1/NRROS/ONECUT1/OVOL2/PCSK6/PPARG/PRDM14/RASL11B/RBPMS2/RUNX2/SKOR2/SLIT2/SMAD6/SMOC2/SOST/SOSTDC1/SPRY4/SULF1/SULF2/…	83
307	Up	GO:0022404	molting cycle process	33/2245	97/18888	0.340206	2.86228	6.75351	9.45021e-09	1.77099e-07	1.07227e-07	ALX4/APCDD1/CDH3/COL6A1/DKK1/DLX3/DSG4/EDAR/FERMT1/FGF10/FOXI3/FOXQ1/FST/FZD6/GAL/HPSE/IGFBP5/LAMA5/LGR4/LGR5/MSX2/NGFR/SHH/SNAI1/SOSTDC1/SOX18/TGFB2/TNFRSF19/TP63/TRADD/WNT10A/WNT10B/WNT5A	33
308	Up	GO:0022405	hair cycle process	33/2245	97/18888	0.340206	2.86228	6.75351	9.45021e-09	1.77099e-07	1.07227e-07	ALX4/APCDD1/CDH3/COL6A1/DKK1/DLX3/DSG4/EDAR/FERMT1/FGF10/FOXI3/FOXQ1/FST/FZD6/GAL/HPSE/IGFBP5/LAMA5/LGR4/LGR5/MSX2/NGFR/SHH/SNAI1/SOSTDC1/SOX18/TGFB2/TNFRSF19/TP63/TRADD/WNT10A/WNT10B/WNT5A	33
309	Up	GO:0010720	positive regulation of cell development	96/2245	454/18888	0.211454	1.77904	6.17092	9.98663e-09	1.86546e-07	1.12947e-07	ACAN/ACE/ACTN3/ANXA1/BMP2/BMP4/BNC1/CCR1/CD4/CD74/CD86/CDH5/CLDN5/CLEC7A/CRABP2/CX3CR1/CXCL12/EGR2/F11R/FES/FN1/FZD4/GATA3/GPER1/HAPLN1/HAPLN3/HCLS1/HLA-DRB1/HLA-G/HLX/HOXA11/ID2/IHH/IL18/IL1B/IL2RG/IL34/IL4R/IL6ST/LEF1/LILRB2/LMOD3/LPAR3/LYN/MDK/MME/MMP14/MYRF/NCKAP1L/NEFL/NFKBIZ/NGF/NKX6-1/NRP1/PCK1/PF4/PIK3R6/POU4F1/POU4F2/PROC/PTPRC/RAG1/RHOH/ROR2/RUNX1/RUNX3/SASH3/SERPINF1/SHH/SHOX2/SLIT2/SM…	96
310	Up	GO:0002573	myeloid leukocyte differentiation	60/2245	239/18888	0.251046	2.11214	6.35485	1.07375e-08	1.99925e-07	1.21047e-07	ANXA2/BATF2/BMP2/BMP4/C1QC/CASP10/CCL3/CCR1/CD4/CD74/CEACAM1/CEBPA/CEBPB/CLDN18/CSF1R/F2RL1/FBN1/FES/FOSL2/GAB3/GATA2/GATA3/GPC3/HCLS1/HLA-DRB1/HOXA7/ID2/IFI16/IL31RA/IL34/ITGB6/LEF1/LTBR/LYN/MITF/MT1G/NKX2-3/NRROS/PF4/POU4F1/POU4F2/PPARG/PRTN3/ROR2/RUNX1/SOCS1/SPI1/STAT5A/TAL1/TCIRG1/TF/TGFB1/TGFBR2/TLR2/TLR4/TNFAIP6/TNFRSF11A/TNFRSF11B/TREM2/TYROBP	60
311	Up	GO:1904019	epithelial cell apoptotic process	43/2245	147/18888	0.292517	2.46105	6.53133	1.11514e-08	2.06474e-07	1.25013e-07	ANGPT1/ANGPTL4/ANXA2/ATOH1/CD248/CD40/CDH5/EDNRA/FGA/FGB/FGF4/FGG/GATA2/GATA3/GPER1/GSN/HAND2/HLA-G/HMOX1/ICAM1/ITGA4/KDR/KRT18/KRT8/LEF1/MDK/NDNF/NFKBIZ/NUPR1/PDX1/PKHD1/RGCC/SERPINB13/SERPINE1/TEK/TERT/TGFB1/TGFBR2/THBS1/TNFAIP3/WNT11/YAP1/ZFP36	43
312	Up	GO:0003272	endocardial cushion formation	16/2245	28/18888	0.571429	4.80764	7.40521	1.12323e-08	2.06474e-07	1.25013e-07	APLNR/BMP2/BMP5/FGF8/HEY2/HEYL/MSX1/MSX2/SNAI1/SNAI2/TBX2/TBX20/TBX3/TGFB2/TGFBR2/TMEM100	16
313	Up	GO:0030194	positive regulation of blood coagulation	16/2245	28/18888	0.571429	4.80764	7.40521	1.12323e-08	2.06474e-07	1.25013e-07	APOH/CD36/EMILIN1/EMILIN2/F2/F7/HPSE/HRG/PLAT/PLAU/PLG/SERPINE1/SERPINF2/THBD/THBS1/VTN	16
314	Up	GO:1900048	positive regulation of hemostasis	16/2245	28/18888	0.571429	4.80764	7.40521	1.12323e-08	2.06474e-07	1.25013e-07	APOH/CD36/EMILIN1/EMILIN2/F2/F7/HPSE/HRG/PLAT/PLAU/PLG/SERPINE1/SERPINF2/THBD/THBS1/VTN	16
315	Up	GO:0030336	negative regulation of cell migration	84/2245	381/18888	0.220472	1.85491	6.19143	1.15159e-08	2.10514e-07	1.27459e-07	ACVRL1/ADAMTS9/ADORA3/ADTRP/AGTR2/AIF1/ALOX15B/ANGPT2/ANGPT4/APOE/APOH/ARHGDIB/BMP10/BMP4/BMP5/BST2/CARD10/CD300A/CD74/CDH1/CDH11/CLDN19/CLDN3/CLDN5/COL3A1/CX3CR1/CXCL12/CYP19A1/CYP1B1/DCN/DLC1/DPEP1/DPP4/EMILIN1/EMILIN2/EPHA1/EPPK1/FIGNL2/GCSAM/GJA1/GREM1/HMOX1/HOXA7/HRG/IFITM1/IGFBP3/IGFBP5/JAG1/KLF4/KRT16/MARVELD3/MEOX2/MITF/MMP28/MYOCD/NGFR/NR2F2/PADI2/PHLDB2/PODN/PPARG/PRKG1/PTGER4/PTPRT/RGC…	84
316	Up	GO:0014033	neural crest cell differentiation	32/2245	93/18888	0.344086	2.89492	6.72799	1.1525e-08	2.10514e-07	1.27459e-07	ALDH1A2/BMP4/CYP26C1/EDN3/EDNRA/EDNRB/FN1/FOLR1/FOXC1/FOXC2/FRZB/GBX2/GDNF/GSC/HAND2/JAG1/LAMA5/NRP1/NRTN/OVOL2/PHOX2B/PITX2/SEMA3B/SEMA3D/SEMA3G/SHH/SIX1/SNAI2/SOX10/TWIST1/WNT10A/WNT8A	32
317	Up	GO:0002367	cytokine production involved in immune response	38/2245	122/18888	0.311475	2.62056	6.59526	1.19482e-08	2.17555e-07	1.31721e-07	ACP5/ANGPT1/APOA1/APOA2/ARG1/BST2/CD36/CD55/CD74/CLC/CLEC7A/F2RL1/GATA3/HFE/HLA-E/HLA-G/IL18/IL18R1/IL1B/IL1R1/LAPTM5/NOD1/NOD2/PLCG2/PRG2/PYCARD/SASH3/SPON2/SYK/TGFB1/TGFB2/TICAM1/TLR4/TNFRSF1B/TNFSF4/TRIM6/TWIST1/WNT5A	38
318	Up	GO:0098754	detoxification	45/2245	158/18888	0.28481	2.39621	6.47269	1.27293e-08	2.31048e-07	1.39891e-07	ABCG2/ADH4/AKR1B10/ALB/ALDH1A1/ALOX5AP/APOA4/APOE/APOM/ATP7B/CD36/DUOX2/FABP1/GCH1/GPX2/GPX7/GPX8/GSTA1/HBA1/HBA2/HBE1/HBG1/HBG2/HBZ/HP/MB/MGST1/MGST2/MPO/MT1E/MT1F/MT1G/MT1H/MT1M/MT1X/MT2A/MUC2/NOS3/NQO1/PTGS1/SLC17A3/SLC22A18/SLC39A8/SLC47A1/SOD3	45
319	Up	GO:0070167	regulation of biomineral tissue development	34/2245	103/18888	0.330097	2.77723	6.64247	1.35647e-08	2.45441e-07	1.48605e-07	ACTN3/AHSG/ALOX5/BMP2/BMP4/CCL3/CCR1/CEBPB/CFTR/COMP/DDR2/ENPP1/FBN2/FGF23/GJA1/GREM1/HEY2/ISG15/MGP/NOS3/NOTUM/OSR1/OSR2/PHOSPHO1/PKDCC/SGMS2/SRGN/TFAP2A/TGFB1/TMEM119/TWIST1/VDR/WNT10B/WNT6	34
320	Up	GO:0071621	granulocyte chemotaxis	39/2245	128/18888	0.304688	2.56345	6.51847	1.53117e-08	2.76184e-07	1.6722e-07	ANXA1/C3AR1/CCL3/CCL3L3/CCL5/CD74/CMKLR1/CSF1R/CSF3R/CXCL1/CXCL2/CXCL3/CXCL6/DPEP1/DPP4/EDN3/FCER1G/IL1B/IL34/ITGA1/ITGA9/ITGB2/LBP/LGALS3/MDK/NCKAP1L/NOD2/PF4/PPBP/RAC2/RARRES2/S100A14/SLIT2/SYK/TGFB2/THBS1/TNFAIP6/TRPV4/VAV1	39
321	Up	GO:0061437	renal system vasculature development	17/2245	32/18888	0.53125	4.4696	7.21445	1.72486e-08	3.09189e-07	1.87203e-07	ACTA2/ANGPT1/ANGPT2/AQP1/BMP4/CD34/EDNRA/FOXC2/IL6R/NRP1/OSR1/PDGFRA/PECAM1/SERPINB7/TCF21/TEK/WT1	17
322	Up	GO:0061440	kidney vasculature development	17/2245	32/18888	0.53125	4.4696	7.21445	1.72486e-08	3.09189e-07	1.87203e-07	ACTA2/ANGPT1/ANGPT2/AQP1/BMP4/CD34/EDNRA/FOXC2/IL6R/NRP1/OSR1/PDGFRA/PECAM1/SERPINB7/TCF21/TEK/WT1	17
323	Up	GO:0035148	tube formation	43/2245	149/18888	0.288591	2.42802	6.42728	1.7356e-08	3.10151e-07	1.87785e-07	ADM/BMP4/BMP5/CTHRC1/DLC1/EDAR/FGF10/FGF8/FOLR1/FZD6/GATA3/GDF7/GDNF/GREM1/GRHL2/GRHL3/HAND1/HNF1B/HOXA1/IRX1/IRX2/IRX3/OSR1/OVOL2/PAX2/PAX8/PODXL/PTK7/RARG/SALL4/SDC4/SHH/SIX1/SIX4/SPINT1/ST14/TGFB1/TGFB2/TGM2/TRIM71/TWIST1/WNT5A/WNT6	43
324	Up	GO:0003044	regulation of systemic arterial blood pressure mediated by a chemical signal	21/2245	47/18888	0.446809	3.75916	6.95582	1.97136e-08	3.50113e-07	2.11981e-07	ACE/ADRB3/AGT/AGTR1/AGTR2/AVPR1A/CTSZ/ECE1/EDN3/EDNRB/ENPEP/F2RL1/HSD11B2/NOS3/OR51E2/PCSK5/REN/SERPINF2/SLC2A5/SUCNR1/TPM1	21
325	Up	GO:0006953	acute-phase response	21/2245	47/18888	0.446809	3.75916	6.95582	1.97136e-08	3.50113e-07	2.11981e-07	A2M/AHSG/CD163/CEBPB/EDNRB/EPO/F2/FN1/HP/IL1A/IL1B/IL6R/LBP/MBL2/ORM1/ORM2/PLSCR1/SERPINA1/SERPINF2/SIGIRR/TNFRSF11A	21
326	Up	GO:0048644	muscle organ morphogenesis	29/2245	81/18888	0.358025	3.01219	6.6654	2.00362e-08	3.54751e-07	2.14789e-07	ACTC1/ANKRD1/BMP10/BMP2/COL3A1/DSP/EDNRA/FOXC1/FOXC2/FOXH1/GSC/HAND1/HEY2/MYL3/MYLK/PKP2/POU4F1/SHOX2/TBX20/TCF15/TGFB1/TGFB2/TGFBR3/TNNC1/TNNI1/TNNT2/TPM1/WNT2/WNT5A	29
327	Up	GO:0035987	endodermal cell differentiation	22/2245	51/18888	0.431373	3.62929	6.90545	2.01004e-08	3.548e-07	2.14819e-07	COL12A1/COL5A1/COL5A2/COL6A1/DKK1/FN1/GATA6/HMGA2/HNF1B/ITGA4/ITGA5/ITGB2/ITGB5/LAMB1/LAMB3/MIXL1/MMP14/MMP2/NANOG/POU5F1/SOX17/VTN	22
328	Up	GO:0045807	positive regulation of endocytosis	44/2245	155/18888	0.283871	2.38831	6.37415	2.05111e-08	3.60945e-07	2.18539e-07	AHSG/ANGPT1/ANXA2/APELA/APOA1/APOA2/APOA5/APOE/C3/C4B/CD36/CLEC7A/CYBA/DAB2/DOCK2/F2RL1/FCER1G/FCGR2A/FCN1/GATA2/GPC3/GREM1/HFE/IL2RB/IL2RG/LDLRAP1/LRRK2/MBL2/NCKAP1L/NOD2/NTF3/PCSK9/PLA2G5/PLCG2/PTPRC/PYCARD/SERPINE1/SYK/TF/TREM2/TULP1/VTN/WNT3A/WNT5A	44
329	Up	GO:0030856	regulation of epithelial cell differentiation	47/2245	171/18888	0.274854	2.31244	6.33191	2.0901e-08	3.66689e-07	2.22017e-07	ACVRL1/ALOX15B/AQP3/ATOH1/BMP2/BMP4/CAV1/CCND1/CDH5/CDKN1C/CEACAM1/CEBPB/CLDN5/ESRP1/ETV4/F11R/FGF10/FOXC1/FRZB/FST/GATA3/GDF3/GDNF/HEY2/HOXA7/IL1A/IL1B/JAG1/LEF1/MSX1/MSX2/NKX6-1/OSR1/OVOL2/PAX2/PAX8/PROC/SERPINE1/SFN/SIX2/TBX3/TMEM100/TP63/VDR/WNT10B/YAP1/ZFP36	47
330	Up	GO:0007178	transmembrane receptor protein serine/threonine kinase signaling pathway	89/2245	417/18888	0.213429	1.79566	6.03425	2.17779e-08	3.80914e-07	2.3063e-07	ACVRL1/AKAP4/AMHR2/BAMBI/BMP10/BMP2/BMP4/BMP5/CAV2/CDH3/CDH5/CDKN1C/CER1/CFC1/CLDN5/COL1A2/COL3A1/COMP/DAB2/DACT2/DKK1/DLX3/DSG4/EMILIN1/FAM83G/FBN1/FBN2/FERMT1/FGF10/FMOD/FOLR1/FOXD1/FOXH1/FST/GATA4/GATA6/GDF10/GDF15/GDF3/GDF6/GDF7/GPC3/GREM1/HFE/HOXA13/HTRA3/ID1/ITGA8/ITGB5/ITGB6/KCP/KDR/LEF1/LRG1/LRRC32/MSX1/MSX2/MYOCD/NPNT/NRROS/ONECUT1/OVOL2/PCSK6/PPARG/RASL11B/RBPMS/RBPMS2/RUNX2/SKOR2/SLC39…	89
331	Up	GO:0051346	negative regulation of hydrolase activity	53/2245	204/18888	0.259804	2.18582	6.25424	2.21413e-08	3.86101e-07	2.3377e-07	AHSG/ANGPTL3/ANGPTL4/ANXA8/ANXA8L1/APOA2/APOC1/APOC3/AQP1/AVP/BCL2L12/CARD16/CD44/CST1/CST2/CST3/DPEP1/FABP1/FETUB/GZMA/HRG/IFI16/IFI6/KLF4/KNG1/LGALS3/LRRK2/MAGEA3/NCKAP1L/PAX2/SERPINA1/SERPINA10/SERPINA12/SERPINA4/SERPINA5/SERPINA6/SERPINA7/SERPINB1/SERPINB11/SERPINB13/SERPINB7/SERPINB9/SERPIND1/SERPINE1/SERPINE3/SERPINF1/SERPINF2/SERPING1/SERPINH1/SFN/SLC39A14/THBS1/VTN	53
332	Up	GO:0120192	tight junction assembly	28/2245	77/18888	0.363636	3.0594	6.65051	2.36713e-08	4.11539e-07	2.49172e-07	ACVRL1/CDH5/CLDN1/CLDN11/CLDN14/CLDN18/CLDN19/CLDN23/CLDN3/CLDN4/CLDN5/CLDN6/CLDN7/CLDN9/F11R/FRMPD2/GPBAR1/GRHL2/ILDR1/LSR/MARVELD2/MARVELD3/OCLN/PECAM1/POF1B/SNAI1/SNAI2/WNT11	28
333	Up	GO:1903706	regulation of hemopoiesis	90/2245	424/18888	0.212264	1.78586	6.01086	2.38474e-08	4.13354e-07	2.50271e-07	ANXA1/ASCL2/BMP4/C1QC/CARD11/CCL3/CCR1/CD28/CD4/CD74/CD86/CEACAM1/CEBPA/CEBPB/CLDN18/CSF3R/ETS1/FBN1/FES/FGL2/GATA2/GATA3/GFI1B/HCLS1/HLA-DOA/HLA-DRB1/HLA-G/HLX/HOXA5/HOXA7/HOXA9/HOXB8/ID2/IHH/IL18/IL2RG/IL34/IL4R/ISG15/JAG1/LEF1/LILRB2/LYN/MDK/MITF/MMP14/NCKAP1L/NFKBIZ/PCK1/PF4/PIK3R6/POU4F1/POU4F2/PRDM1/PTPN6/PTPRC/RAG1/RARG/RHOH/ROR2/RUNX1/RUNX3/SASH3/SCIN/SHH/SMARCD2/SNAI2/SOCS1/SOX13/SPI1/SY…	90
334	Up	GO:0042116	macrophage activation	35/2245	110/18888	0.318182	2.67698	6.47848	2.4288e-08	4.19731e-07	2.54132e-07	AIF1/C1QA/CCL3/CD74/CD84/CD93/CEBPA/CTSC/CX3CR1/DYSF/GRN/IL31RA/IL4R/ITGAM/ITGB2/LBP/LRRK2/NMI/PLA2G4A/PLCG2/PTPRC/SPHK1/SUCNR1/SYK/THBS1/TICAM1/TLR1/TLR2/TLR4/TLR6/TMEM106A/TREM2/TYROBP/VSIG4/WNT5A	35
335	Up	GO:0021545	cranial nerve development	25/2245	64/18888	0.390625	3.28647	6.72935	2.51262e-08	4.32921e-07	2.62118e-07	ACKR3/ATP8B1/DRGX/EGR2/ERBB3/HOXA1/HOXA3/HOXB1/HOXB2/HOXB3/HOXD3/LPAR1/NAV2/NEUROG1/NRP1/NTRK1/PAX2/PHOX2A/PHOX2B/POU4F1/POU4F3/SIX1/SIX4/TCIRG1/TFAP2A	25
336	Up	GO:0040013	negative regulation of locomotion	91/2245	431/18888	0.211137	1.77637	5.98827	2.60259e-08	4.47088e-07	2.70695e-07	ACVRL1/ADAMTS9/ADORA3/ADTRP/AGTR2/AIF1/ALOX15B/ANGPT2/ANGPT4/APOE/APOH/ARHGDIB/BMP10/BMP4/BMP5/BST2/CARD10/CD300A/CD74/CDH1/CDH11/CLDN19/CLDN3/CLDN5/COL3A1/CX3CR1/CXCL12/CYP19A1/CYP1B1/DCN/DLC1/DPEP1/DPP4/EMILIN1/EMILIN2/EPHA1/EPPK1/FIGNL2/GATA3/GCSAM/GJA1/GREM1/HMOX1/HOXA7/HRG/IFITM1/IGFBP3/IGFBP5/JAG1/KLF4/KRT16/MARVELD3/MEOX2/MITF/MMP28/MYOCD/NGFR/NR2F2/NRP1/PADI2/PHLDB2/PODN/PPARG/PRKG1/PTGER…	91
337	Up	GO:0071706	tumor necrosis factor superfamily cytokine production	51/2245	194/18888	0.262887	2.21176	6.23075	2.6724e-08	4.56364e-07	2.76312e-07	ACP5/ANGPT1/CCL3/CD33/CD36/CD84/CD86/CLEC7A/CX3CR1/CYBA/CYBB/ELF4/FCGR2A/GPNMB/HLA-E/IGF1/IL1A/LBP/LRRK2/NOD1/NOD2/NR1H4/OAS1/OAS2/OAS3/ORM1/ORM2/PF4/PLCG2/POMC/PTPN6/PTPRC/PYCARD/SASH3/SPN/SPON2/SYK/TGFB1/THBS1/TICAM1/TLR1/TLR2/TLR4/TMEM106A/TNFAIP3/TNFRSF8/TREM2/TWIST1/TYROBP/WNT5A/ZFP36	51
338	Up	GO:1903555	regulation of tumor necrosis factor superfamily cytokine production	51/2245	194/18888	0.262887	2.21176	6.23075	2.6724e-08	4.56364e-07	2.76312e-07	ACP5/ANGPT1/CCL3/CD33/CD36/CD84/CD86/CLEC7A/CX3CR1/CYBA/CYBB/ELF4/FCGR2A/GPNMB/HLA-E/IGF1/IL1A/LBP/LRRK2/NOD1/NOD2/NR1H4/OAS1/OAS2/OAS3/ORM1/ORM2/PF4/PLCG2/POMC/PTPN6/PTPRC/PYCARD/SASH3/SPN/SPON2/SYK/TGFB1/THBS1/TICAM1/TLR1/TLR2/TLR4/TMEM106A/TNFAIP3/TNFRSF8/TREM2/TWIST1/TYROBP/WNT5A/ZFP36	51
339	Up	GO:0046635	positive regulation of alpha-beta T cell activation	27/2245	73/18888	0.369863	3.11179	6.63948	2.76577e-08	4.70915e-07	2.85122e-07	ANXA1/CARD11/CD28/CD55/CD86/EBI3/HLA-DRB1/HLA-E/HLX/IHH/IL18/IL2RG/IL4R/NCKAP1L/NFKBIZ/PTPRC/RUNX1/RUNX3/SASH3/SHH/SOCS1/SYK/TGFBR2/TNFSF4/ZAP70/ZBTB16/ZBTB7B	27
340	Up	GO:0032640	tumor necrosis factor production	50/2245	189/18888	0.26455	2.22576	6.22014	2.92464e-08	4.95045e-07	2.99732e-07	ACP5/ANGPT1/CCL3/CD33/CD36/CD84/CLEC7A/CX3CR1/CYBA/CYBB/ELF4/FCGR2A/GPNMB/HLA-E/IGF1/IL1A/LBP/LRRK2/NOD1/NOD2/NR1H4/OAS1/OAS2/OAS3/ORM1/ORM2/PF4/PLCG2/POMC/PTPN6/PTPRC/PYCARD/SASH3/SPN/SPON2/SYK/TGFB1/THBS1/TICAM1/TLR1/TLR2/TLR4/TMEM106A/TNFAIP3/TNFRSF8/TREM2/TWIST1/TYROBP/WNT5A/ZFP36	50
341	Up	GO:0032680	regulation of tumor necrosis factor production	50/2245	189/18888	0.26455	2.22576	6.22014	2.92464e-08	4.95045e-07	2.99732e-07	ACP5/ANGPT1/CCL3/CD33/CD36/CD84/CLEC7A/CX3CR1/CYBA/CYBB/ELF4/FCGR2A/GPNMB/HLA-E/IGF1/IL1A/LBP/LRRK2/NOD1/NOD2/NR1H4/OAS1/OAS2/OAS3/ORM1/ORM2/PF4/PLCG2/POMC/PTPN6/PTPRC/PYCARD/SASH3/SPN/SPON2/SYK/TGFB1/THBS1/TICAM1/TLR1/TLR2/TLR4/TMEM106A/TNFAIP3/TNFRSF8/TREM2/TWIST1/TYROBP/WNT5A/ZFP36	50
342	Up	GO:0007586	digestion	40/2245	136/18888	0.294118	2.47452	6.33826	3.02726e-08	5.10916e-07	3.09341e-07	AKR1D1/APOA2/AQP1/CCK/CD36/CYP8B1/ENPP7/F11R/FABP1/FGF10/KCNQ1/MDK/MOGAT2/MUC13/MUC2/MUC4/NEUROG1/NOD2/NPC1L1/NPSR1/OPRK1/PNLIPRP2/PRAP1/PRSS1/PRSS2/PRSS3/RBP4/SI/SLC26A7/SLC2A5/SOAT2/SPINK1/SST/TFF1/TFF2/TFF3/TLR4/TYMP/VDR/VIL1	40
343	Up	GO:0001649	osteoblast differentiation	62/2245	257/18888	0.241245	2.02968	6.10416	3.07796e-08	5.17958e-07	3.13605e-07	AREG/BAMBI/BMP2/BMP4/CCL3/CEBPA/CEBPB/CEBPD/COL1A1/COL6A1/CREB3L1/CTHRC1/DDR2/DHH/FBN2/FGF23/FHL2/FOSL2/GDF10/GJA1/GLI1/GREM1/HAND2/HGF/HOXA2/ID3/IFITM1/IGF1/IGF2/IGFBP3/IGFBP5/IHH/IL6R/IL6ST/ITGA11/JAG1/LEF1/LGR4/MSX2/NPNT/PPARG/PTH1R/PTHLH/RRBP1/RSPO2/RUNX2/SHH/SHOX2/SMAD6/SNAI1/SNAI2/TCIRG1/TMEM119/TNFAIP6/TP63/TWIST1/TWIST2/VEGFC/WNT10B/WNT11/WNT3A/YAP1	62
344	Up	GO:0072079	nephron tubule formation	13/2245	20/18888	0.65	5.46869	7.34354	3.15177e-08	5.28838e-07	3.20192e-07	GATA3/GDNF/GREM1/HNF1B/IRX1/IRX2/IRX3/OSR1/PAX2/PAX8/SIX1/SIX4/WNT6	13
345	Up	GO:0030099	myeloid cell differentiation	92/2245	439/18888	0.209567	1.76316	5.94207	3.17253e-08	5.30778e-07	3.21367e-07	ALAS2/ANXA2/BATF2/BMP2/BMP4/C1QC/CASP10/CCL3/CCR1/CD4/CD74/CDKN1C/CEACAM1/CEBPA/CEBPB/CLDN18/CLEC1B/CSF1R/CSF3R/EPAS1/EPO/ETS1/F2RL1/FBN1/FES/FLI1/FOSL2/GAB3/GATA2/GATA3/GP9/GPC3/HCLS1/HLA-DRB1/HOXA5/HOXA7/HOXA9/HOXB7/HOXB8/ID2/IFI16/IL11/IL31RA/IL34/IRF8/ISG15/ITGB6/JAG1/KCNQ1/LEF1/LTBR/LYN/MAF/MB/MFAP2/MITF/MT1G/NCKAP1L/NKX2-3/NRROS/PF4/POU4F1/POU4F2/PPARG/PRTN3/PTPN6/RAC2/RARG/RASGRP4/ROR2/RUN…	92
346	Up	GO:2000146	negative regulation of cell motility	85/2245	396/18888	0.214646	1.8059	5.95264	3.43809e-08	5.73545e-07	3.4726e-07	ACVRL1/ADAMTS9/ADORA3/ADTRP/AGTR2/AIF1/ALOX15B/ANGPT2/ANGPT4/APOE/APOH/ARHGDIB/BMP10/BMP4/BMP5/BST2/CARD10/CD300A/CD74/CDH1/CDH11/CLDN19/CLDN3/CLDN5/COL3A1/CX3CR1/CXCL12/CYP19A1/CYP1B1/DCN/DLC1/DPEP1/DPP4/EMILIN1/EMILIN2/EPHA1/EPPK1/FIGNL2/GATA3/GCSAM/GJA1/GREM1/HMOX1/HOXA7/HRG/IFITM1/IGFBP3/IGFBP5/JAG1/KLF4/KRT16/MARVELD3/MEOX2/MITF/MMP28/MYOCD/NGFR/NR2F2/PADI2/PHLDB2/PODN/PPARG/PRKG1/PTGER4/PTP…	85
347	Up	GO:0120193	tight junction organization	29/2245	83/18888	0.349398	2.93961	6.50415	3.75018e-08	6.23806e-07	3.77692e-07	ACVRL1/CDH5/CLDN1/CLDN11/CLDN14/CLDN18/CLDN19/CLDN23/CLDN3/CLDN4/CLDN5/CLDN6/CLDN7/CLDN9/F11R/FRMPD2/GPBAR1/GRHL2/ILDR1/LSR/MARVELD2/MARVELD3/OCLN/PECAM1/POF1B/SNAI1/SNAI2/SVEP1/WNT11	29
348	Up	GO:0060415	muscle tissue morphogenesis	27/2245	74/18888	0.364865	3.06974	6.55187	3.86422e-08	6.40927e-07	3.88058e-07	ACTC1/ANKRD1/BMP10/BMP2/COL3A1/DSP/EDNRA/FOXC1/FOXC2/FOXH1/HAND1/HEY2/MYL3/MYLK/PKP2/POU4F1/SHOX2/TBX20/TGFB1/TGFB2/TGFBR3/TNNC1/TNNI1/TNNT2/TPM1/WNT2/WNT5A	27
349	Up	GO:0003161	cardiac conduction system development	18/2245	37/18888	0.486486	4.09299	6.91649	3.94788e-08	6.52927e-07	3.95324e-07	BMP4/DSG2/GATA4/GATA6/GJA1/GJA5/GJB6/HEY2/ID2/IRX3/MSC/MSX1/MSX2/NPPB/SHOX2/TBX18/TBX3/TBX5	18
350	Up	GO:0032963	collagen metabolic process	34/2245	107/18888	0.317757	2.67341	6.3754	3.97707e-08	6.55875e-07	3.97109e-07	ADAMTS14/ADAMTS2/BMP4/COL1A1/COL1A2/COL5A1/COL6A1/CREB3L1/CST3/DDR2/EMILIN1/F2/FOSL2/IHH/KLK6/MFAP4/MMP1/MMP10/MMP14/MMP19/MMP2/MMP23B/MMP28/PCOLCE/PRSS2/PRTN3/RCN3/RGCC/RUNX1/SERPINB7/SERPINF2/SERPINH1/TGFB1/TMPRSS6	34
351	Up	GO:0003014	renal system process	38/2245	127/18888	0.299213	2.51738	6.30149	4.00775e-08	6.59052e-07	3.99032e-07	ABCG2/ADM/AGT/AGTR1/AGTR2/AMN/AQP1/AQP3/BMP4/CD34/CLCNKA/CLCNKB/CLDN4/CYP4F12/EDNRA/EDNRB/F2RL1/GJA5/GSN/HAS2/HNF1A/HSD11B2/KCNQ1/NPPB/NPR3/OIT3/OR51E2/PCSK5/PON3/REN/SERPINF2/SLC22A6/SLC4A1/STC1/SUCNR1/SULF1/SULF2/TBC1D8B	38
352	Up	GO:0055008	cardiac muscle tissue morphogenesis	24/2245	61/18888	0.393443	3.31018	6.63733	4.04385e-08	6.631e-07	4.01483e-07	ACTC1/ANKRD1/BMP10/BMP2/DSP/EDNRA/FOXC1/FOXC2/FOXH1/HAND1/HEY2/MYL3/PKP2/POU4F1/TBX20/TGFB1/TGFB2/TGFBR3/TNNC1/TNNI1/TNNT2/TPM1/WNT2/WNT5A	24
353	Up	GO:0002444	myeloid leukocyte mediated immunity	35/2245	112/18888	0.3125	2.62918	6.35111	4.05703e-08	6.63375e-07	4.0165e-07	ACE/ANXA3/ARG1/C3/CCL3/CD177/CD300A/CD84/CX3CR1/CXCL6/DNASE1L3/F2/F2RL1/FCGR2A/FES/FOXF1/GATA2/HLA-E/IL4R/ITGAM/ITGB2/LYN/MILR1/PTGDR/PTGDS/RAC2/S100A13/SERPINB9/SPI1/SPON2/STXBP2/SYK/TICAM1/TYROBP/VAMP8	35
354	Up	GO:0051047	positive regulation of secretion	71/2245	312/18888	0.227564	1.91458	5.98269	4.0949e-08	6.67677e-07	4.04254e-07	ADCYAP1/ANKRD1/ANO1/ANXA2/AQP1/AVP/AVPR1A/BMP2/CD177/CD33/CFTR/CXCL12/CYBA/CYP19A1/DAB2/EDN3/F2/F2RL1/FGA/FGB/FGG/GAL/GATA2/GCG/GDNF/GPER1/HFE/HLA-DRB1/IGF1/IL1A/IL1B/IL4R/ILDR1/ITGAM/ITGB2/ITPR1/KLRC2/NKX3-1/NKX6-1/NPPB/NR1H4/OPRK1/OR51E2/ORAI1/P2RY2/PCK2/PDX1/PLA2G4A/PPARG/RBP4/RFX6/RGCC/S100A10/SCIN/SDC4/SLC18A3/SLC2A2/SPINK1/SYK/TGFB1/TGFB2/TLR2/TLR4/TNFRSF11A/TREM2/TRH/VAMP8/VEGFC/WLS/XBP1/Z…	71
355	Up	GO:0050820	positive regulation of coagulation	16/2245	30/18888	0.533333	4.48713	7.02028	4.24745e-08	6.8673e-07	4.1579e-07	APOH/CD36/EMILIN1/EMILIN2/F2/F7/HPSE/HRG/PLAT/PLAU/PLG/SERPINE1/SERPINF2/THBD/THBS1/VTN	16
356	Up	GO:0060037	pharyngeal system development	16/2245	30/18888	0.533333	4.48713	7.02028	4.24745e-08	6.8673e-07	4.1579e-07	BMP4/BMP5/ECE1/EDNRA/EYA1/FGF8/FOLR1/FOXI3/GATA3/HOXA2/NKX3-1/RIPPLY3/SIX1/SIX4/TBX2/TGFB2	16
357	Up	GO:0072012	glomerulus vasculature development	16/2245	30/18888	0.533333	4.48713	7.02028	4.24745e-08	6.8673e-07	4.1579e-07	ACTA2/ANGPT1/ANGPT2/AQP1/BMP4/CD34/EDNRA/FOXC2/IL6R/OSR1/PDGFRA/PECAM1/SERPINB7/TCF21/TEK/WT1	16
358	Up	GO:0050731	positive regulation of peptidyl-tyrosine phosphorylation	45/2245	164/18888	0.27439	2.30854	6.18137	4.37907e-08	7.06033e-07	4.27478e-07	AGT/ANGPT1/ANGPT4/AREG/CCL5/CD36/CD4/CD40/CD44/CD74/CSF1R/CSPG4/EHD4/ENPP2/EPO/FGF10/FGF8/GH1/GHR/GREM1/HCLS1/HGF/HPX/IGF1/IL11/IL18/IL31RA/IL34/IL6R/IL6ST/ITGA5/LYN/NOD2/NOX4/NRP1/NTF3/PECAM1/PLCG2/PTPRC/SYK/TGFB1/TNFRSF18/TREM2/TSLP/VTN	45
359	Up	GO:0050671	positive regulation of lymphocyte proliferation	41/2245	143/18888	0.286713	2.41222	6.2259	4.52834e-08	7.28067e-07	4.40818e-07	AIF1/ANXA1/CARD11/CCL5/CD28/CD55/CD70/CD74/CD86/EBI3/EPO/FGF10/HHLA2/HLA-DMB/HLA-DPA1/HLA-E/ICOSLG/IGF1/IGF2/IL18/IL1A/IL1B/IL6ST/LILRB2/NCKAP1L/NFATC2/PTPRC/PYCARD/SASH3/SHH/SPN/SPTA1/SYK/TGFBR2/TICAM1/TLR4/TNFSF4/VTCN1/WNT3A/ZAP70/ZP3	41
360	Up	GO:0071825	protein-lipid complex organization	22/2245	53/18888	0.415094	3.49234	6.67323	4.69763e-08	7.53187e-07	4.56027e-07	AGT/AGTR1/APOA1/APOA2/APOA4/APOA5/APOB/APOC1/APOC3/APOE/APOM/LIPC/MPO/MTTP/NR1H4/PCDHGA3/PCSK5/PCSK6/PLA2G2A/PLA2G5/PLA2G7/SOAT2	22
361	Up	GO:0010463	mesenchymal cell proliferation	20/2245	45/18888	0.444444	3.73927	6.75679	4.78665e-08	7.65333e-07	4.63382e-07	BMP2/BMP4/FGF4/FOXF1/GPC3/HAND2/IHH/KDR/MSX1/OSR1/PRRX1/SHH/SHOX2/SIX1/SIX2/TBX2/TGFBR2/WNT11/WNT2/WNT5A	20
362	Up	GO:0006911	phagocytosis, engulfment	21/2245	49/18888	0.428571	3.60573	6.70767	4.83871e-08	7.69395e-07	4.65841e-07	AIF1/ALOX15/BIN2/C3/CD300A/CD36/F2RL1/GATA2/GSN/HAVCR1/ITGAM/ITGB2/MSR1/NCKAP1L/PLCG2/SH3BP1/THBS1/TIMD4/TREM2/XKR5/XKR8	21
363	Up	GO:0030850	prostate gland development	21/2245	49/18888	0.428571	3.60573	6.70767	4.83871e-08	7.69395e-07	4.65841e-07	ALOX15B/BMP4/CRIP1/CYP19A1/FGF10/FOXA1/GLI1/HOXA10/HOXA11/HOXA13/HOXA9/HOXD13/MMP2/NKX3-1/PSAPL1/RARG/SERPINF1/SHH/SULF1/TP63/WNT5A	21
364	Up	GO:0035282	segmentation	33/2245	103/18888	0.320388	2.69554	6.33718	5.01348e-08	7.94995e-07	4.81341e-07	ALDH1A2/CDX1/CDX2/DKK1/DMRT2/EGR2/FOXB1/FOXC1/FOXC2/FOXF1/GDF3/HOXA2/HOXD8/IRX1/IRX2/IRX3/LAMA5/LEF1/MEOX1/MEOX2/NEUROG1/NKD1/NKX3-1/NRP1/OSR1/PCSK6/SHH/TBX18/TBX3/TCF15/WNT3A/WNT5A/WT1	33
365	Up	GO:0018958	phenol-containing compound metabolic process	35/2245	113/18888	0.309735	2.60591	6.28846	5.21185e-08	8.24186e-07	4.99015e-07	CDH3/CGA/CPQ/DBH/DIO1/DUOX2/DUOXA1/DUOXA2/EDNRA/EPAS1/FAH/GATA3/GCH1/GRIN2A/HAND2/HPN/HTR1A/ITGAM/ITGB2/IYD/MAOB/OCA2/OPN3/PAH/PAX8/PMEL/RAB38/SLC26A7/SLC6A3/SULT1A1/SULT1A2/SULT2A1/TGFB2/TYRP1/WNT5A	35
366	Up	GO:0031639	plasminogen activation	15/2245	27/18888	0.555556	4.67409	7.01654	5.46332e-08	8.61593e-07	5.21663e-07	ANXA2/APOH/CTSZ/F11/FGA/FGB/FGG/HPN/PLAT/PLAU/RUNX1/S100A10/SERPINE1/SERPINF2/THBS1	15
367	Up	GO:0034113	heterotypic cell-cell adhesion	24/2245	62/18888	0.387097	3.25679	6.53704	5.85746e-08	9.21233e-07	5.57773e-07	APOA1/CD44/CEACAM6/CTNNA3/DSC2/DSG2/DSP/FGA/FGB/FGG/IL1B/ITGA4/ITGA5/ITGAM/ITGAX/ITGB2/ITGB7/KLF4/LCK/LILRB2/MYADM/PERP/PKP2/PTPRC	24
368	Up	GO:0051897	positive regulation of phosphatidylinositol 3-kinase/protein kinase B signal transduction	46/2245	171/18888	0.269006	2.26324	6.09454	5.99332e-08	9.40039e-07	5.6916e-07	AGT/ANGPT1/CCL3/CCL5/CD28/CHI3L1/CSF1R/CX3CR1/DCN/ERBB3/F2/F2RL1/FLT1/FN1/FSHR/GATA3/GDF15/GH1/GPER1/HCLS1/HGF/HPSE/IGF1/IGF2/IGFBP5/IL18/KDR/LIN28A/LTK/NKX3-1/NOX4/P2RY12/PDGFRA/PIK3AP1/PIK3R5/PTPN6/SELP/SERPINA12/TEK/TGFB1/TGFB2/THBS1/TPBG/TREM2/TSPYL5/UNC5B	46
369	Up	GO:0060538	skeletal muscle organ development	48/2245	182/18888	0.263736	2.21891	6.06863	6.0912e-08	9.52802e-07	5.76887e-07	ACTN3/ANKRD1/ANKRD33/ASB2/ATF3/B4GALNT2/BARX2/CAV1/CAV2/CHRNA1/CHRND/COL6A1/DES/EGR2/FLNB/HEYL/HLX/HOXD10/HOXD9/IGF2/KLF5/KLHL40/LMOD3/MEOX2/MSC/MYOCD/MYOZ1/NPHS1/NR2F2/NUPR1/P2RX2/PHOX2B/PITX1/POPDC3/SHH/SHOX2/SIX1/SIX4/SMYD1/STRA6/TCF21/TGFB1/TWIST1/VAMP5/VGLL2/WNT10B/WNT3A/WT1	48
370	Up	GO:0070830	bicellular tight junction assembly	26/2245	71/18888	0.366197	3.08095	6.45193	6.30737e-08	9.8395e-07	5.95746e-07	ACVRL1/CDH5/CLDN1/CLDN11/CLDN14/CLDN18/CLDN19/CLDN23/CLDN3/CLDN4/CLDN5/CLDN6/CLDN7/CLDN9/F11R/FRMPD2/GPBAR1/GRHL2/MARVELD2/MARVELD3/OCLN/PECAM1/POF1B/SNAI1/SNAI2/WNT11	26
371	Up	GO:0046942	carboxylic acid transport	78/2245	358/18888	0.217877	1.83308	5.84472	6.47596e-08	1.0055e-06	6.08791e-07	ABCC2/ABCC3/ABCC6/ABCG2/ACE/ACSL5/AGXT/APOE/ATP8B1/AVP/AVPR1A/BDKRB2/CD36/CEACAM1/CES1/CRABP1/CRABP2/FABP1/FOLR1/FOLR2/GJA1/IL1A/IL1B/LLGL2/LRRC8E/NMUR2/PLA2G12B/PLA2G2A/PLA2G4A/PLA2G4F/PLA2G5/PPARG/PRKG1/RBP2/RBP5/RGS4/SLC13A2/SLC13A5/SLC16A11/SLC16A12/SLC16A3/SLC16A5/SLC1A5/SLC22A3/SLC22A6/SLC22A7/SLC22A9/SLC23A1/SLC26A3/SLC26A7/SLC27A2/SLC27A6/SLC2A1/SLC35D2/SLC36A2/SLC38A4/SLC38A5/SLC3A1/SLC4…	78
372	Up	GO:0031638	zymogen activation	23/2245	58/18888	0.396552	3.33633	6.54482	6.49775e-08	1.0055e-06	6.08791e-07	ANXA2/APOH/CTSH/CTSZ/F11/FGA/FGB/FGG/GRIN2A/HPN/IFI16/MMP14/PERP/PLAT/PLAU/PRSS12/PRSS3/RUNX1/S100A10/SERPINE1/SERPINF2/THBD/THBS1	23
373	Up	GO:0042733	embryonic digit morphogenesis	23/2245	58/18888	0.396552	3.33633	6.54482	6.49775e-08	1.0055e-06	6.08791e-07	ALX4/BMP4/ECE1/FREM2/FZD6/GJA1/GRHL2/HAND2/HOXA11/HOXC11/HOXD12/HOXD13/IHH/MSX1/MSX2/OSR1/OSR2/SHH/TBX2/TBX3/TWIST1/WNT5A/ZBTB16	23
374	Up	GO:0045582	positive regulation of T cell differentiation	36/2245	119/18888	0.302521	2.54522	6.21036	6.62702e-08	1.02276e-06	6.19244e-07	ANXA1/CD74/CD86/GATA3/HLA-DRB1/HLA-G/HLX/IHH/IL18/IL2RG/IL4R/LEF1/LILRB2/MDK/NCKAP1L/NFKBIZ/PCK1/PIK3R6/PTPRC/RAG1/RHOH/RUNX1/RUNX3/SASH3/SHH/SMARCD2/SOCS1/SOX13/SYK/TGFBR2/TNFSF4/WNT10B/XBP1/ZAP70/ZBTB16/ZBTB7B	36
375	Up	GO:0043010	camera-type eye development	76/2245	346/18888	0.219653	1.84802	5.8471	6.68709e-08	1.02928e-06	6.2319e-07	ACVRL1/ALDH1A2/ALDH1A3/AQP1/ARHGEF15/BARHL2/BCAR3/BIRC7/BMP4/CALB1/CDKN1C/COL4A1/COL8A2/CRYAB/CRYBA1/CRYBA4/CRYBB1/CYP1A1/CYP1B1/EFEMP1/FBN1/FBN2/FGF10/FLT1/FOXC1/FOXC2/FOXF2/FZD4/GATA3/GJA1/GRHL2/GRHL3/IHH/JAG1/KDR/KLF4/LAMC3/LIM2/MAB21L2/MAF/MITF/MTNR1B/NEUROD4/NRP1/OSR2/PAX2/PDE6A/PDGFRA/PITX2/PITX3/POU4F2/PPP1R13L/PRDM1/PRSS56/RARG/RBP4/SAMD11/SERPINF1/SHH/SLC6A3/STRA6/TBX2/TCIRG1/TFAP2A/TFAP…	76
376	Up	GO:0052548	regulation of endopeptidase activity	65/2245	280/18888	0.232143	1.9531	5.90123	6.88919e-08	1.05756e-06	6.40317e-07	AHSG/ANXA8/ANXA8L1/AQP1/ATP2A3/AVP/BCL2L12/BIRC3/CARD16/CASP10/CD44/CLEC7A/CST1/CST2/CST3/DLC1/DPEP1/FABP1/FAM162A/FETUB/GPER1/GRIN2A/GSN/HRG/IFI16/IFI6/KLF4/KNG1/LAPTM5/LCK/LYN/MAGEA3/NGFR/NKX3-1/NLRP1/NLRP12/NOD1/PAX2/PERP/PPARG/PYCARD/SERPINA1/SERPINA10/SERPINA12/SERPINA4/SERPINA5/SERPINA6/SERPINA7/SERPINB1/SERPINB11/SERPINB13/SERPINB7/SERPINB9/SERPIND1/SERPINE1/SERPINE3/SERPINF1/SERPINF2/SERP…	65
377	Up	GO:0010632	regulation of epithelial cell migration	68/2245	298/18888	0.228188	1.91983	5.87826	7.03559e-08	1.07717e-06	6.52189e-07	ACVRL1/ADAMTS9/AGT/AGTR2/ANGPT1/ANGPT2/ANGPT4/ANXA1/ANXA3/APOE/APOH/BMP10/CARD10/CCBE1/CD40/CEACAM1/CTSH/DCN/ENPP2/EPPK1/ETS1/FGF10/FGF18/FGF4/FGFBP1/FOXC2/GATA2/GATA3/GRN/HAS2/HMOX1/HRG/KDR/KLF4/MARVELD3/MEOX2/MET/NOS3/NR2F2/NRP1/PLCG2/PLG/PPARG/RAB25/RGCC/RRAS/RREB1/SASH1/SERPINF1/SH3BP1/SLIT2/SMOC2/SP100/SPARC/SRPX2/STARD13/STAT5A/STC1/TACSTD2/TEK/TGFB1/TGFB2/TGFBR2/TGFBR3/THBS1/VEGFC/VIL1/WNT…	68
378	Up	GO:0016264	gap junction assembly	12/2245	18/18888	0.666667	5.60891	7.18493	7.19458e-08	1.0957e-06	6.63408e-07	ACE/AGT/APLNR/CAV1/GJA1/GJA5/GJB1/GJB2/GJB6/IL1B/IRX3/TBX5	12
379	Up	GO:0051917	regulation of fibrinolysis	12/2245	18/18888	0.666667	5.60891	7.18493	7.19458e-08	1.0957e-06	6.63408e-07	APOH/F11/F2/HRG/PLAT/PLAU/PLG/SERPINE1/SERPINF2/THBD/THBS1/VTN	12
380	Up	GO:0033002	muscle cell proliferation	60/2245	251/18888	0.239044	2.01116	5.92303	7.25348e-08	1.10177e-06	6.67079e-07	ADAMTS1/AIF1/ANGPT1/APOE/BMP10/BMP2/BMP4/CALCRL/CAV2/CCL5/CNN1/DBH/DDR2/EREG/FES/FGF20/FOXC1/FOXC2/GATA6/GJA1/GLI1/GPER1/HEY2/HGF/HMOX1/ID2/IGF1/IGFBP3/IGFBP5/IL18/IL6R/KLF4/LDLRAP1/MMP2/MYOCD/NOS3/OGN/P2RY6/PPARG/PRKG1/PTGIR/RBP4/RBPMS2/RUNX1/SERPINF2/SHH/SIX1/TBX2/TBX20/TBX5/TERT/TGFB1/TGFB2/TGFBR3/THBS1/TLR4/TNFAIP3/TPM1/WNT2/YAP1	60
381	Up	GO:0015849	organic acid transport	78/2245	359/18888	0.21727	1.82797	5.81716	7.32846e-08	1.11023e-06	6.72206e-07	ABCC2/ABCC3/ABCC6/ABCG2/ACE/ACSL5/AGXT/APOE/ATP8B1/AVP/AVPR1A/BDKRB2/CD36/CEACAM1/CES1/CRABP1/CRABP2/FABP1/FOLR1/FOLR2/GJA1/IL1A/IL1B/LLGL2/LRRC8E/NMUR2/PLA2G12B/PLA2G2A/PLA2G4A/PLA2G4F/PLA2G5/PPARG/PRKG1/RBP2/RBP5/RGS4/SLC13A2/SLC13A5/SLC16A11/SLC16A12/SLC16A3/SLC16A5/SLC1A5/SLC22A3/SLC22A6/SLC22A7/SLC22A9/SLC23A1/SLC26A3/SLC26A7/SLC27A2/SLC27A6/SLC2A1/SLC35D2/SLC36A2/SLC38A4/SLC38A5/SLC3A1/SLC4…	78
382	Up	GO:0090189	regulation of branching involved in ureteric bud morphogenesis	13/2245	21/18888	0.619048	5.20827	7.08657	7.36883e-08	1.11343e-06	6.74139e-07	AGT/AGTR2/BMP4/GDNF/GREM1/HOXB7/LGR4/PAX2/PAX8/SIX1/SIX2/SIX4/TACSTD2	13
383	Up	GO:0071827	plasma lipoprotein particle organization	21/2245	50/18888	0.42	3.53361	6.58843	7.41055e-08	1.11681e-06	6.76186e-07	AGT/AGTR1/APOA1/APOA2/APOA4/APOA5/APOB/APOC1/APOC3/APOE/APOM/LIPC/MPO/MTTP/NR1H4/PCSK5/PCSK6/PLA2G2A/PLA2G5/PLA2G7/SOAT2	21
384	Up	GO:0072175	epithelial tube formation	39/2245	135/18888	0.288889	2.43053	6.12635	7.6528e-08	1.15031e-06	6.96472e-07	ADM/BMP4/BMP5/CTHRC1/DLC1/FGF10/FGF8/FOLR1/FZD6/GATA3/GDF7/GDNF/GREM1/GRHL2/GRHL3/HAND1/HNF1B/IRX1/IRX2/IRX3/OSR1/OVOL2/PAX2/PAX8/PODXL/PTK7/RARG/SALL4/SDC4/SIX1/SIX4/SPINT1/ST14/TGFB1/TGFB2/TRIM71/TWIST1/WNT5A/WNT6	39
385	Up	GO:1904035	regulation of epithelial cell apoptotic process	35/2245	115/18888	0.304348	2.56059	6.16516	8.50157e-08	1.27457e-06	7.71708e-07	ANGPT1/ANGPTL4/ATOH1/CD248/CD40/CDH5/FGA/FGB/FGG/GATA2/GATA3/GPER1/GSN/HAND2/HLA-G/HMOX1/ICAM1/ITGA4/KDR/MDK/NDNF/NUPR1/PDX1/PKHD1/RGCC/SERPINB13/SERPINE1/TEK/TERT/TGFB1/THBS1/TNFAIP3/WNT11/YAP1/ZFP36	35
386	Up	GO:0032946	positive regulation of mononuclear cell proliferation	41/2245	146/18888	0.280822	2.36266	6.07056	8.54933e-08	1.27511e-06	7.72033e-07	AIF1/ANXA1/CARD11/CCL5/CD28/CD55/CD70/CD74/CD86/EBI3/EPO/FGF10/HHLA2/HLA-DMB/HLA-DPA1/HLA-E/ICOSLG/IGF1/IGF2/IL18/IL1A/IL1B/IL6ST/LILRB2/NCKAP1L/NFATC2/PTPRC/PYCARD/SASH3/SHH/SPN/SPTA1/SYK/TGFBR2/TICAM1/TLR4/TNFSF4/VTCN1/WNT3A/ZAP70/ZP3	41
387	Up	GO:0061008	hepaticobiliary system development	41/2245	146/18888	0.280822	2.36266	6.07056	8.54933e-08	1.27511e-06	7.72033e-07	ALDH1A2/CCND1/CEACAM1/CEBPA/CEBPB/CLDN1/CPS1/CYP1A1/FGL1/FOXH1/FRZB/GATA6/GLI1/HGF/HLX/HMGCS2/HNF1A/HNF1B/HPN/IHH/LIMS2/LSR/MDK/MET/ONECUT1/OTC/PCK1/PCK2/PCSK9/PDX1/PTPN3/SERPINA10/SOX17/SULF2/TBX3/TGFBR3/TNFAIP3/VTN/WNT1/WNT3A/XBP1	41
388	Up	GO:1904888	cranial skeletal system development	26/2245	72/18888	0.361111	3.03816	6.36377	8.7623e-08	1.30351e-06	7.89225e-07	BMP4/EDNRA/FGF4/FGF8/FOXC2/FREM1/GRHL2/HOXA1/HOXA2/IRF6/IRX5/MMP14/MSX2/NEUROG1/PDGFRA/PRRX1/RUNX2/SIX1/SIX2/SIX4/TBX15/TFAP2A/TGFB2/TGFBR2/TP63/TWIST1	26
389	Up	GO:0015718	monocarboxylic acid transport	47/2245	179/18888	0.26257	2.2091	5.96947	9.6329e-08	1.42933e-06	8.6541e-07	ABCC2/ABCC3/ABCG2/ACE/ACSL5/APOE/ATP8B1/BDKRB2/CD36/CEACAM1/CES1/CRABP1/CRABP2/FABP1/IL1A/IL1B/NMUR2/PLA2G12B/PLA2G2A/PLA2G4A/PLA2G4F/PLA2G5/PPARG/RBP2/RBP5/SLC16A11/SLC16A12/SLC16A3/SLC16A5/SLC22A3/SLC22A6/SLC22A7/SLC22A9/SLC26A7/SLC27A2/SLC27A6/SLC2A1/SLC51A/SLC51B/SLC5A12/SLCO1A2/SLCO1B1/SLCO2A1/SLCO2B1/SYK/THBS1/TNFRSF11A	47
390	Up	GO:0097006	regulation of plasma lipoprotein particle levels	30/2245	91/18888	0.32967	2.77364	6.22895	9.82767e-08	1.4545e-06	8.80644e-07	AGT/AGTR1/ANXA2/APOA1/APOA2/APOA4/APOA5/APOB/APOC1/APOC3/APOE/APOM/CD36/DGAT2/HMOX1/LDLRAP1/LIPC/MPO/MSR1/MTTP/MYLIP/NR1H4/PCSK5/PCSK6/PCSK9/PLA2G2A/PLA2G5/PLA2G7/SOAT2/TREM2	30
391	Up	GO:0071300	cellular response to retinoic acid	25/2245	68/18888	0.367647	3.09315	6.35065	1.02938e-07	1.51959e-06	9.20055e-07	ALDH1A2/AQP1/COL1A1/FZD10/FZD4/HAND2/HOXA2/KLF4/LTK/LYN/OSR1/PAX2/PCK1/PTK7/RARG/SERPINF1/WNT10B/WNT11/WNT2/WNT3A/WNT5A/WNT6/WNT8B/WNT9A/YAP1	25
392	Up	GO:0003156	regulation of animal organ formation	15/2245	28/18888	0.535714	4.50716	6.82083	1.04711e-07	1.5379e-06	9.3114e-07	BMP2/BMP4/DKK1/FGF10/FGF8/GATA5/GDNF/HOXA11/HOXC11/SHH/SIX1/SULF1/WNT2/WNT5A/WT1	15
393	Up	GO:0042634	regulation of hair cycle	15/2245	28/18888	0.535714	4.50716	6.82083	1.04711e-07	1.5379e-06	9.3114e-07	CDH3/EPS8L3/FA2H/FERMT1/FST/GAL/HPSE/MSX2/NGFR/TERT/TGFB2/TRADD/TRPV3/WNT10B/WNT5A	15
394	Up	GO:0046660	female sex differentiation	36/2245	121/18888	0.297521	2.50315	6.09216	1.05965e-07	1.55236e-06	9.39899e-07	A2M/ADAMTS1/AFP/AMHR2/CEBPB/CGA/CYP19A1/DMC1/EREG/FGF10/FOXC1/FSHR/FST/FZD4/GAS2/KDR/LHX9/MMP14/MMP2/NOS3/NR2F2/NR5A1/NUPR1/PDGFRA/PGR/RBP4/SLIT2/SLIT3/STRA6/TBX3/TNFAIP6/TP63/WNT5A/WT1/ZFP42/ZP3	36
395	Up	GO:0001990	regulation of systemic arterial blood pressure by hormone	18/2245	39/18888	0.461538	3.88309	6.61943	1.10079e-07	1.60854e-06	9.73914e-07	ACE/AGT/AGTR1/AGTR2/AVPR1A/CTSZ/ECE1/EDN3/EDNRB/ENPEP/F2RL1/HSD11B2/NOS3/OR51E2/PCSK5/REN/SERPINF2/SUCNR1	18
396	Up	GO:0009410	response to xenobiotic stimulus	91/2245	444/18888	0.204955	1.72436	5.67274	1.10987e-07	1.61772e-06	9.79472e-07	AADAC/ABCC2/ABCC3/ABCC6/ACE/ACSM1/ACSM2B/AGPAT2/AHR/ANKRD1/AOX1/APOA2/BCAR3/C1orf115/CA9/CCND1/CCNO/CDH1/CDH3/COL18A1/COL1A1/COL6A1/CPS1/CRYZ/CSAG3/CYBB/CYP1A1/CYP1B1/CYP26A1/CYP2C9/CYP2J2/CYP2S1/CYP2W1/CYP4F12/DPEP1/DUSP6/FBP1/FGF8/FMO1/FMO2/FMO4/FMO5/FOSL2/GAL/GATA4/GATA6/GRIN2A/GSTA1/GSTA2/HMGCS2/HNF4A/HSD11B2/HSPG2/IL1B/KCNQ1/LCK/LYN/MAOB/MMP2/NAT1/NAT2/NCKAP1L/NFATC2/NFKBIZ/NKX3-1/NKX6-1/NNM…	91
397	Up	GO:0001974	blood vessel remodeling	21/2245	51/18888	0.411765	3.46433	6.47219	1.11909e-07	1.62705e-06	9.85121e-07	ACE/ACVRL1/AGT/AGTR2/CEACAM1/CST3/DBH/EDNRA/EPAS1/FGF10/FGF8/FOXC1/FOXC2/HOXA3/HRG/JAG1/NOS3/NPR3/RSPO3/TGFB1/TMBIM1	21
398	Up	GO:0030500	regulation of bone mineralization	28/2245	82/18888	0.341463	2.87286	6.24219	1.12331e-07	1.62908e-06	9.8635e-07	ACTN3/AHSG/ALOX5/BMP2/BMP4/CCL3/CCR1/COMP/DDR2/ENPP1/FBN2/FGF23/GJA1/GREM1/ISG15/MGP/NOTUM/OSR1/OSR2/PHOSPHO1/PKDCC/SGMS2/SRGN/TFAP2A/TMEM119/TWIST1/VDR/WNT10B	28
399	Up	GO:0050730	regulation of peptidyl-tyrosine phosphorylation	55/2245	225/18888	0.244444	2.0566	5.85578	1.13798e-07	1.64622e-06	9.96724e-07	AGT/ANGPT1/ANGPT4/AREG/CAV1/CBLC/CCL5/CD300A/CD36/CD4/CD40/CD44/CD74/CSF1R/CSPG4/EHD4/ENPP2/EPO/FGF10/FGF8/GH1/GHR/GPRC5A/GREM1/HCLS1/HGF/HPX/HRG/IGF1/IL11/IL18/IL31RA/IL34/IL6R/IL6ST/ITGA5/ITGB2/LYN/MVP/NOD2/NOX4/NRP1/NTF3/PECAM1/PLCG2/PTPN6/PTPRC/SOCS1/SPINK1/SYK/TGFB1/TNFRSF18/TREM2/TSLP/VTN	55
400	Up	GO:0035265	organ growth	47/2245	180/18888	0.261111	2.19682	5.92552	1.15542e-07	1.66727e-06	1.00947e-06	BMP10/BNC2/CER1/CGA/CLDN18/COL14A1/COL27A1/COMP/CYP19A1/DDR2/DUSP6/FES/FGF10/FGF20/FGF8/FOSL2/FOXC1/FOXC2/GATA4/GATA6/GLI1/HEY2/HLX/IGF1/IGF2/LEPR/MAEL/MSX2/PRKG1/PSAPL1/RARG/RBP4/RGS4/RSPO2/RUNX1/SASH3/SHH/STC1/TBX2/TBX20/TBX5/TGFB2/TGFBR2/TGFBR3/WNT2/WT1/YAP1	47
401	Up	GO:1905523	positive regulation of macrophage migration	14/2245	25/18888	0.56	4.71148	6.82003	1.3399e-07	1.92865e-06	1.16773e-06	C3AR1/CCL3/CCL5/CMKLR1/CSF1R/CX3CR1/IL34/MDK/MMP14/P2RY12/RARRES2/THBS1/TREM2/TRPV4	14
402	Up	GO:0001706	endoderm formation	23/2245	60/18888	0.383333	3.22512	6.34018	1.36165e-07	1.95509e-06	1.18374e-06	COL12A1/COL5A1/COL5A2/COL6A1/DKK1/FN1/GATA6/HMGA2/HNF1B/ITGA4/ITGA5/ITGB2/ITGB5/LAMB1/LAMB3/MIXL1/MMP14/MMP2/NANOG/POU5F1/SOX17/TBX20/VTN	23
403	Up	GO:0048332	mesoderm morphogenesis	27/2245	78/18888	0.346154	2.91232	6.21565	1.36804e-07	1.95939e-06	1.18634e-06	APELA/BMP4/DKK1/EYA1/EYA2/FOXC1/FOXC2/FOXF1/GJA1/HAND1/HMGA2/HOXA11/ITGA8/ITGB4/KLF4/LEF1/PAX2/SIX2/SNAI1/TAL1/TBX20/TBX3/TLX2/WLS/WNT11/WNT3A/WNT5A	27
404	Up	GO:0001889	liver development	40/2245	143/18888	0.27972	2.35339	5.96653	1.37404e-07	1.96312e-06	1.1886e-06	ALDH1A2/CCND1/CEACAM1/CEBPA/CEBPB/CLDN1/CPS1/CYP1A1/FGL1/FOXH1/FRZB/GATA6/GLI1/HGF/HLX/HMGCS2/HNF1A/HNF1B/HPN/IHH/LIMS2/LSR/MDK/MET/ONECUT1/OTC/PCK1/PCK2/PCSK9/PDX1/PTPN3/SERPINA10/SULF2/TBX3/TGFBR3/TNFAIP3/VTN/WNT1/WNT3A/XBP1	40
405	Up	GO:0007519	skeletal muscle tissue development	45/2245	170/18888	0.264706	2.22707	5.90251	1.38768e-07	1.9777e-06	1.19743e-06	ACTN3/ANKRD1/ANKRD33/ASB2/ATF3/B4GALNT2/BARX2/CAV1/CAV2/CHRNA1/CHRND/COL6A1/EGR2/FLNB/HEYL/HLX/HOXD10/HOXD9/IGF2/KLF5/KLHL40/LMOD3/MEOX2/MSC/MYOCD/MYOZ1/NPHS1/NR2F2/NUPR1/P2RX2/PHOX2B/PITX1/POPDC3/SHH/SHOX2/SIX1/SIX4/SMYD1/TCF21/TGFB1/TWIST1/VAMP5/VGLL2/WNT10B/WNT3A	45
406	Up	GO:0072593	reactive oxygen species metabolic process	57/2245	238/18888	0.239496	2.01497	5.78727	1.42432e-07	2.02492e-06	1.22602e-06	ACP5/AGT/AGTR1/ALOX5/APOA4/CD177/CD36/CLEC7A/COL6A1/CRYAB/CYBA/CYBB/CYP1A1/CYP1B1/DUOX2/DUOXA1/DUOXA2/F2/F2RL1/FOXO1/GCH1/HBA1/HBA2/HBE1/HBG1/HBG2/HBZ/HK2/HP/IFI6/ITGAM/ITGB2/LRRK2/MAOB/MB/MPO/NCF2/NCF4/NOS3/NOX4/NQO1/PAGE4/PAX2/PLCG2/PON3/RAC2/RIPK3/SOD3/SYK/TFAP2A/TGFB1/TGFBR2/THBS1/TLR4/TLR6/TYROBP/VAV1	57
407	Up	GO:0019229	regulation of vasoconstriction	25/2245	69/18888	0.362319	3.04832	6.26034	1.433e-07	2.02728e-06	1.22744e-06	ACE/ADM/ADRA1D/ADRA2B/AGT/AGTR1/ARHGAP42/AVP/AVPR1A/BDKRB2/CAV1/DBH/ECE1/EDN3/FGA/FGB/FGG/GJA5/HTR1A/ITGA4/ITGA9/MMP2/MTNR1B/P2RX1/SVEP1	25
408	Up	GO:0060191	regulation of lipase activity	25/2245	69/18888	0.362319	3.04832	6.26034	1.433e-07	2.02728e-06	1.22744e-06	AGTR1/ANGPTL3/ANGPTL4/ANXA8/ANXA8L1/APOA2/APOA4/APOA5/APOC1/APOC3/APOH/ARHGAP6/AVPR1A/CCL5/CD86/EDNRA/FLT1/GNA15/LPAR1/P2RY6/PDGFRA/PLA2G5/PLCB2/RASGRP4/TXK	25
409	Up	GO:2001233	regulation of apoptotic signaling pathway	83/2245	396/18888	0.209596	1.76341	5.63879	1.47523e-07	2.08191e-06	1.26052e-06	ACKR3/AGT/AGTR2/ATF3/AVP/BCL2L12/BDKRB2/BMP4/BMP5/CAV1/CD44/CD74/COL2A1/CREB3L1/CTSC/CTSH/CTSV/CX3CR1/CXCL12/DBH/EPO/EYA1/EYA2/FAIM/FGA/FGB/FGF10/FGG/G0S2/GATA4/GDNF/GPER1/HGF/HMOX1/ICAM1/IFI6/IGF1/IL1A/IL1B/IL20RA/LCK/LGALS3/LRRK2/LTB/LTBR/MAGEA3/MAL/MMP2/MSX1/NGFR/NKX3-1/NOS3/NRP1/NUPR1/PDX1/PF4/PLEKHF1/PTPRC/PYCARD/PYCR1/RIPK3/SERPINE1/SNAI1/SNAI2/SP100/SRPX/TERT/THBS1/TLR4/TLR6/TMBIM1/TNFAIP3…	83
410	Up	GO:0032635	interleukin-6 production	46/2245	176/18888	0.261364	2.19895	5.86908	1.52159e-07	2.1357e-06	1.29309e-06	AFAP1L2/AIF1/CD36/CD74/CD84/CEBPB/CLEC7A/CYBA/ELF4/EREG/F2RL1/HGF/IL1A/IL1B/IL1RAP/IL6R/LBP/LILRB2/NCKAP1L/NLRP12/NOD1/NOD2/NR1H4/ORM1/PLCG2/PTPN6/PYCARD/SPON2/SYK/TGFB1/TICAM1/TLR1/TLR2/TLR4/TLR6/TMEM106A/TNFAIP3/TNFSF4/TREM2/TRPV4/TSLP/TWIST1/TYROBP/UNC93B1/WNT5A/XBP1	46
411	Up	GO:0032675	regulation of interleukin-6 production	46/2245	176/18888	0.261364	2.19895	5.86908	1.52159e-07	2.1357e-06	1.29309e-06	AFAP1L2/AIF1/CD36/CD74/CD84/CEBPB/CLEC7A/CYBA/ELF4/EREG/F2RL1/HGF/IL1A/IL1B/IL1RAP/IL6R/LBP/LILRB2/NCKAP1L/NLRP12/NOD1/NOD2/NR1H4/ORM1/PLCG2/PTPN6/PYCARD/SPON2/SYK/TGFB1/TICAM1/TLR1/TLR2/TLR4/TLR6/TMEM106A/TNFAIP3/TNFSF4/TREM2/TRPV4/TSLP/TWIST1/TYROBP/UNC93B1/WNT5A/XBP1	46
412	Up	GO:2000648	positive regulation of stem cell proliferation	22/2245	56/18888	0.392857	3.30525	6.34509	1.52445e-07	2.1357e-06	1.29309e-06	EPCAM/FGF10/FGF4/FGF8/GJA1/HMGA2/HOXA3/KDR/NANOG/OSR2/PRRX1/PTPRC/RUNX2/SHOX2/TBX3/TERT/TGFB1/TP63/VEGFC/WNT1/WNT10B/WNT5A	22
413	Up	GO:0055001	muscle cell development	51/2245	204/18888	0.25	2.10334	5.81921	1.52893e-07	2.1368e-06	1.29375e-06	ACTC1/ACTN3/ADM/ALPK2/ALPK3/ANKRD1/ASB2/BMP10/BMP4/CAPN3/CAV2/COL14A1/COL6A1/COMP/EDNRA/FHL2/FLNC/GATA4/HEY2/IGF1/KLHL40/KRT19/KRT8/LDB3/LMOD1/LMOD3/MYBPC1/MYL9/MYLK3/MYOM3/MYOZ1/NFATC2/NRAP/P2RX2/PDGFRA/PGM5/PRKG1/RGS4/SHOX2/SIX1/SIX4/SYPL2/TBX18/TBX3/TBX5/TNNT1/TNNT2/TNNT3/TPM1/WFIKKN1/WNT10B	51
414	Up	GO:0045621	positive regulation of lymphocyte differentiation	38/2245	133/18888	0.285714	2.40382	5.96694	1.53578e-07	2.14119e-06	1.29641e-06	ANXA1/CD74/CD86/GATA3/HLA-DRB1/HLA-G/HLX/IHH/IL18/IL2RG/IL4R/LEF1/LILRB2/MDK/MMP14/NCKAP1L/NFKBIZ/PCK1/PIK3R6/PTPRC/RAG1/RHOH/RUNX1/RUNX3/SASH3/SHH/SMARCD2/SOCS1/SOX13/SPI1/SYK/TGFBR2/TNFSF4/WNT10B/XBP1/ZAP70/ZBTB16/ZBTB7B	38
415	Up	GO:0030217	T cell differentiation	69/2245	310/18888	0.222581	1.87265	5.68979	1.56418e-07	2.17552e-06	1.3172e-06	ANXA1/ASCL2/BMP4/CARD11/CD28/CD3D/CD3G/CD4/CD74/CD86/DOCK2/FCER1G/FGL2/FOSL2/GATA3/HLA-DOA/HLA-DRB1/HLA-G/HLX/IHH/IL18/IL18R1/IL1A/IL1B/IL2RG/IL4R/IL6R/LCK/LEF1/LEPR/LILRB2/MDK/MR1/NCKAP1L/NFKBIZ/NKX2-3/PCK1/PIK3R6/PRDM1/PTGER4/PTPRC/RAG1/RHOH/RIPK3/RUNX1/RUNX2/RUNX3/SASH3/SHH/SMARCD2/SOCS1/SOX13/SPI1/SPN/STAT6/SYK/TCF7/TCIRG1/TGFB1/TGFBR2/TNFRSF9/TNFSF4/VAV1/WNT1/WNT10B/XBP1/ZAP70/ZBTB16/ZBTB7B	69
416	Up	GO:0034374	low-density lipoprotein particle remodeling	11/2245	16/18888	0.6875	5.78419	7.03126	1.61178e-07	2.23634e-06	1.35402e-06	AGT/AGTR1/APOA2/APOB/APOE/LIPC/MPO/MTTP/PLA2G2A/PLA2G5/PLA2G7	11
417	Up	GO:0060317	cardiac epithelial to mesenchymal transition	17/2245	36/18888	0.472222	3.97298	6.55749	1.6387e-07	2.26825e-06	1.37334e-06	BMP2/FGF8/HAS2/HEY2/HEYL/JAG1/MSX1/MSX2/SNAI1/SNAI2/TBX3/TGFB2/TGFBR2/TGFBR3/TMEM100/TWIST1/WNT2	17
418	Up	GO:0001838	embryonic epithelial tube formation	36/2245	123/18888	0.292683	2.46245	5.9763	1.67114e-07	2.30211e-06	1.39384e-06	ADM/BMP4/BMP5/CTHRC1/DLC1/FOLR1/FZD6/GATA3/GDF7/GDNF/GREM1/GRHL2/GRHL3/HAND1/HNF1B/IRX1/IRX2/IRX3/OSR1/OVOL2/PAX2/PAX8/PTK7/RARG/SALL4/SDC4/SIX1/SIX4/SPINT1/ST14/TGFB1/TGFB2/TRIM71/TWIST1/WNT5A/WNT6	36
419	Up	GO:0045446	endothelial cell differentiation	36/2245	123/18888	0.292683	2.46245	5.9763	1.67114e-07	2.30211e-06	1.39384e-06	ACVRL1/BMP4/CDH5/CEACAM1/CLDN1/CLDN3/CLDN5/COL18A1/COL27A1/EDNRA/EDNRB/F11R/F2RL1/FZD4/HEY2/HOXA13/HOXB5/HPSE/ICAM1/IL1B/JAG1/KDR/MARVELD2/MET/MYADM/NR2F2/NRP1/PECAM1/PROC/ROBO4/SOX17/SOX18/STC1/TIE1/TJP3/TMEM100	36
420	Up	GO:0002690	positive regulation of leukocyte chemotaxis	30/2245	93/18888	0.322581	2.71399	6.08558	1.69441e-07	2.32307e-06	1.40653e-06	AIF1/C3AR1/CCL3/CCL5/CCR1/CD74/CMKLR1/CSF1R/CX3CR1/CXCL12/EDN3/F2RL1/F7/GPSM3/IL34/IL6R/LBP/MDK/NCKAP1L/PGF/PLA2G7/PRSS56/RAC2/RARRES2/S100A14/SERPINE1/THBS1/TRPV4/VEGFC/WNT5A	30
421	Up	GO:0048525	negative regulation of viral process	30/2245	93/18888	0.322581	2.71399	6.08558	1.69441e-07	2.32307e-06	1.40653e-06	APOBEC3B/APOBEC3C/APOBEC3D/APOBEC3F/APOBEC3G/APOBEC3H/BST2/CCL5/FCN1/GSN/HMGA2/IFI16/IFIT1/IFITM1/IFITM2/IFITM3/ISG15/ISG20/LY6E/MBL2/MX1/OAS1/OAS2/OAS3/OASL/PLSCR1/SLPI/TRIM14/TRIM6/ZFP36	30
422	Up	GO:0008202	steroid metabolic process	72/2245	329/18888	0.218845	1.84122	5.65334	1.7133e-07	2.34341e-06	1.41885e-06	ACOX2/ADM/AFP/AKR1B15/AKR1D1/ANGPTL3/APOA1/APOA4/APOA5/APOB/APOBR/APOC1/APOE/ATP8B1/BMP2/BMP5/CEBPA/CES1/CFTR/CGA/CLN6/CYB5R2/CYP11A1/CYP19A1/CYP1A1/CYP1B1/CYP26A1/CYP26C1/CYP27A1/CYP2C9/CYP8B1/DAB2/DHH/EDNRB/EPHX2/FGF23/FMO5/GAL/GPRC6A/HMGCS2/HSD11B2/HSD17B2/HSD17B3/IGFBP7/IL1A/LDLRAP1/LEPR/LIPC/MALRD1/NPC1L1/NR1H4/NR5A1/NR5A2/PCSK9/PDGFRA/PON1/PRKG1/SERPINA12/SERPINA6/SHH/SLC27A2/SNAI1/SNAI2/SO…	72
423	Up	GO:0003184	pulmonary valve morphogenesis	12/2245	19/18888	0.631579	5.3137	6.90918	1.74048e-07	2.37495e-06	1.43795e-06	BMP4/GJA5/HEY2/HEYL/JAG1/NFATC1/NOS3/SLIT2/SMAD6/STRA6/TBX20/TGFB2	12
424	Up	GO:0034109	homotypic cell-cell adhesion	31/2245	98/18888	0.316327	2.66137	6.05606	1.7475e-07	2.37891e-06	1.44034e-06	ADAMTS18/CCL5/CD9/CEACAM1/CEACAM5/COMP/CTNNA3/DSC2/DSG2/DSP/EMILIN1/EMILIN2/F11R/FGA/FGB/FGG/FGL1/IL6ST/LYN/MYL12A/MYL9/P2RY12/PDGFRA/PEAR1/PKP2/PLEK/PRKG1/PTPN6/SYK/TLN1/WNT3A	31
425	Up	GO:0003279	cardiac septum development	33/2245	108/18888	0.305556	2.57075	6.01236	1.77707e-07	2.41347e-06	1.46127e-06	APLNR/BMP4/BMP5/FGF8/GATA3/GATA4/GATA6/GJA5/HAND1/HEY2/HEYL/HOXA13/JAG1/MSX2/NOS3/NRP1/PAX8/PRDM1/PTK7/SALL4/SLIT2/SLIT3/SMAD6/STRA6/TBX2/TBX20/TBX3/TBX5/TGFB2/TGFBR2/TGFBR3/WNT11/WNT5A	33
426	Up	GO:0030178	negative regulation of Wnt signaling pathway	46/2245	177/18888	0.259887	2.18652	5.8249	1.82216e-07	2.46889e-06	1.49483e-06	ALPK2/APCDD1/APCDD1L/APOE/BMP2/CAV1/CTHRC1/DAB2/DKK1/DKK2/FERMT1/FOXO1/FRZB/FZD6/GLI1/GPC3/GREM1/GSC/HIC1/IGFBP4/IGFBP6/MDFI/MDK/NKD1/NKD2/NOTUM/RBMS3/RNF43/SFRP5/SHH/SHISA3/SNAI2/SOST/SOSTDC1/SOX10/SOX13/SOX17/TAX1BP3/TBX18/TMEM88/TPBG/TRABD2A/TRABD2B/WIF1/WNT11/WNT5A	46
427	Up	GO:0001890	placenta development	41/2245	150/18888	0.273333	2.29965	5.86928	1.92287e-07	2.59925e-06	1.57375e-06	ADM/APELA/ASCL2/BMP5/CDKN1C/CDX2/CDX4/CEBPA/CEBPB/DLX3/DNMT3L/EPAS1/EPOR/GATA2/GJB2/GRHL2/HAND1/HEY2/HSD17B2/IGF2/KRT19/KRT8/LEF1/LHX3/MDFI/MME/NR2F2/OVOL2/PHLDA2/PLAC1/PLG/PPARG/PRDM1/RSPO3/SNAI1/SPINT1/ST14/STC1/STC2/VDR/WNT2	41
428	Up	GO:0007219	Notch signaling pathway	47/2245	183/18888	0.256831	2.16081	5.79537	1.97092e-07	2.65798e-06	1.60931e-06	ACVRL1/AGXT/ANGPT4/ANXA4/ATOH1/BMP2/CDH6/CEBPA/CNTN6/DLK1/DTX3L/EGFL7/FGF10/FOXA1/FOXC1/FOXC2/GAS2/GATA2/GATA5/HEY2/HEYL/HNF1B/HOXD3/IL6ST/JAG1/KRT19/LLGL2/MMP14/NEUROD4/NOD2/NOS3/NR1H4/ONECUT1/PERP/POSTN/SIX1/SNAI1/SNAI2/SUSD5/TBX2/TGFB2/TGFBR2/TMEM100/TP63/TSPAN15/WNT1/YAP1	47
429	Up	GO:0050868	negative regulation of T cell activation	37/2245	129/18888	0.286822	2.41314	5.9149	1.99926e-07	2.68366e-06	1.62486e-06	ANXA1/ARG1/ASCL2/BMP4/CD300A/CD74/CD86/CEBPB/FGL1/FGL2/GPNMB/HFE/HLA-DRB1/HLA-E/HLA-G/HLX/IDO1/IHH/IL4R/LAPTM5/LGALS3/LILRB2/LRRC32/MDK/PLA2G2A/PLA2G5/PTPN6/RUNX1/RUNX3/SDC4/SHH/SOCS1/SPN/TNFSF4/VSIG4/VTCN1/ZBTB7B	37
430	Up	GO:1990266	neutrophil migration	37/2245	129/18888	0.286822	2.41314	5.9149	1.99926e-07	2.68366e-06	1.62486e-06	C3AR1/CCL3/CCL3L3/CCL5/CD177/CD74/CSF3R/CXCL1/CXCL2/CXCL3/CXCL6/DPEP1/DPP4/EDN3/FCER1G/IL1A/IL1B/IL1R1/ITGA1/ITGA9/ITGB2/LBP/LGALS3/MCOLN2/MDK/NCKAP1L/NOD2/PECAM1/PF4/PPBP/PRTN3/RAC2/SLIT2/SYK/TGFB2/TNFAIP6/VAV1	37
431	Up	GO:1903532	positive regulation of secretion by cell	65/2245	288/18888	0.225694	1.89885	5.64548	2.08203e-07	2.78827e-06	1.6882e-06	ADCYAP1/ANKRD1/ANO1/ANXA2/AVP/AVPR1A/BMP2/CD177/CD33/CFTR/CXCL12/CYP19A1/DAB2/EDN3/F2/F2RL1/FGA/FGB/FGG/GAL/GATA2/GCG/GDNF/GPER1/HFE/HLA-DRB1/IGF1/IL1A/IL1B/IL4R/ILDR1/ITGAM/ITGB2/ITPR1/KLRC2/NKX3-1/NKX6-1/NR1H4/OPRK1/OR51E2/ORAI1/PCK2/PDX1/PLA2G4A/PPARG/RBP4/RFX6/RGCC/S100A10/SDC4/SLC18A3/SLC2A2/SPINK1/SYK/TGFB1/TGFB2/TLR2/TLR4/TNFRSF11A/TREM2/TRH/VAMP8/VEGFC/WLS/ZP3	65
432	Up	GO:0042310	vasoconstriction	29/2245	89/18888	0.325843	2.74143	6.04795	2.12357e-07	2.83732e-06	1.71789e-06	ACE/ACTA2/ADM/ADRA1D/ADRA2B/AGT/AGTR1/ARHGAP42/AVP/AVPR1A/BDKRB2/CAV1/COMP/DBH/ECE1/EDN3/EDNRA/EDNRB/FGA/FGB/FGG/GJA5/HTR1A/ITGA4/ITGA9/MMP2/MTNR1B/P2RX1/SVEP1	29
433	Up	GO:0022600	digestive system process	32/2245	104/18888	0.307692	2.58873	5.96686	2.27336e-07	3.03045e-06	1.83483e-06	APOA2/AQP1/CD36/CYP8B1/ENPP7/F11R/FABP1/FGF10/KCNQ1/MDK/MOGAT2/MUC13/MUC2/MUC4/NEUROG1/NOD2/NPC1L1/NPSR1/OPRK1/PRAP1/RBP4/SLC26A7/SLC2A5/SOAT2/SPINK1/TFF1/TFF2/TFF3/TLR4/TYMP/VDR/VIL1	32
434	Up	GO:0060795	cell fate commitment involved in formation of primary germ layer	16/2245	33/18888	0.484848	4.07921	6.50214	2.39883e-07	3.19033e-06	1.93163e-06	BMP4/DKK1/ETS2/EYA1/EYA2/FOXC2/GATA6/HNF1B/HOXA11/KLF4/NANOG/PAX2/POU5F1/SIX2/SOX17/WNT3A	16
435	Up	GO:0014032	neural crest cell development	27/2245	80/18888	0.3375	2.83951	6.0555	2.47106e-07	3.27884e-06	1.98522e-06	ALDH1A2/BMP4/CYP26C1/EDN3/EDNRA/EDNRB/FN1/FOLR1/FOXC1/FOXC2/GBX2/GDNF/HAND2/JAG1/LAMA5/NRP1/NRTN/OVOL2/PHOX2B/PITX2/SEMA3B/SEMA3D/SEMA3G/SHH/SNAI2/SOX10/TWIST1	27
436	Up	GO:0036230	granulocyte activation	20/2245	49/18888	0.408163	3.43403	6.26568	2.66144e-07	3.52336e-06	2.13327e-06	ANXA1/ANXA3/CCL3/CCL5/CD177/CD300A/CXCL6/DNASE1L3/ENPP3/F2RL1/FCER1G/GRN/IL18/ITGAM/ITGB2/PLA2G2A/SPI1/STXBP2/SYK/TYROBP	20
437	Up	GO:0010934	macrophage cytokine production	17/2245	37/18888	0.459459	3.8656	6.40801	2.69603e-07	3.55285e-06	2.15112e-06	ACP5/CD36/CD74/HLA-G/LAPTM5/NOD1/NOD2/PLCG2/PRG2/PYCARD/SPON2/TGFB1/TGFB2/TICAM1/TLR4/TWIST1/WNT5A	17
438	Up	GO:0010935	regulation of macrophage cytokine production	17/2245	37/18888	0.459459	3.8656	6.40801	2.69603e-07	3.55285e-06	2.15112e-06	ACP5/CD36/CD74/HLA-G/LAPTM5/NOD1/NOD2/PLCG2/PRG2/PYCARD/SPON2/TGFB1/TGFB2/TICAM1/TLR4/TWIST1/WNT5A	17
439	Up	GO:2000351	regulation of endothelial cell apoptotic process	23/2245	62/18888	0.370968	3.12109	6.14397	2.74033e-07	3.60301e-06	2.18149e-06	ANGPT1/ANGPTL4/CD248/CD40/CDH5/FGA/FGB/FGG/GATA2/GATA3/GPER1/HLA-G/ICAM1/ITGA4/KDR/NDNF/RGCC/SERPINE1/TEK/TERT/TGFB1/THBS1/TNFAIP3	23
440	Up	GO:0043300	regulation of leukocyte degranulation	19/2245	45/18888	0.422222	3.55231	6.29562	2.79599e-07	3.66783e-06	2.22074e-06	CD177/CD300A/CD84/CEACAM1/F2RL1/FES/FOXF1/GATA2/IL4R/ITGAM/ITGB2/KLRC2/LYN/NCKAP1L/RAC2/SPI1/STXBP2/SYK/VAMP8	19
441	Up	GO:0045861	negative regulation of proteolysis	55/2245	231/18888	0.238095	2.00318	5.63428	2.87428e-07	3.76199e-06	2.27775e-06	AHSG/ANXA8/ANXA8L1/AQP1/AVP/BCL2L12/CARD16/CD44/CST1/CST2/CST3/CTSZ/DPEP1/F2/FABP1/FETUB/HFE/HRG/IFI16/IFI6/IL1R2/KLF4/KLHL40/KNG1/LRRK2/MAGEA3/NLRP7/PAX2/PLAT/PLAU/PTPN3/SERPINA1/SERPINA10/SERPINA12/SERPINA4/SERPINA5/SERPINA6/SERPINA7/SERPINB1/SERPINB11/SERPINB13/SERPINB7/SERPINB9/SERPIND1/SERPINE1/SERPINE3/SERPINF1/SERPINF2/SERPING1/SERPINH1/SFN/SHH/THBS1/VTN/WNT1	55
442	Up	GO:0001707	mesoderm formation	26/2245	76/18888	0.342105	2.87826	6.02584	3.03e-07	3.95683e-06	2.39572e-06	APELA/BMP4/DKK1/EYA1/EYA2/FOXC1/FOXC2/FOXF1/GJA1/HAND1/HMGA2/HOXA11/ITGA8/ITGB4/KLF4/LEF1/PAX2/SIX2/SNAI1/TAL1/TBX20/TLX2/WLS/WNT11/WNT3A/WNT5A	26
443	Up	GO:0030100	regulation of endocytosis	65/2245	291/18888	0.223368	1.87927	5.55166	3.09967e-07	4.03866e-06	2.44526e-06	AHSG/ALOX15/ANGPT1/ANXA2/APELA/APOA1/APOA2/APOA5/APOC1/APOC3/APOE/C3/C4B/CAV1/CD177/CD300A/CD36/CLEC7A/CYBA/DAB2/DKK1/DOCK2/DYSF/EHD4/F2RL1/FCER1G/FCGR2A/FCN1/GATA2/GPC3/GREM1/HCK/HFE/IL2RB/IL2RG/LDLRAP1/LGALS3/LPAR1/LRRK2/MBL2/NCKAP1L/NOD2/NTF3/PACSIN3/PCSK9/PLA2G5/PLCG2/PLSCR1/PRTN3/PTPRC/PYCARD/RAB17/RIN3/RSPO1/SERPINE1/SPHK1/SYK/TF/TGM2/TLR2/TREM2/TULP1/VTN/WNT3A/WNT5A	65
444	Up	GO:0098742	cell-cell adhesion via plasma-membrane adhesion molecules	63/2245	279/18888	0.225806	1.89979	5.56104	3.1272e-07	4.06536e-06	2.46143e-06	AJUBA/ALCAM/AMIGO2/APOA1/BMP2/CD164/CD177/CD84/CDH1/CDH11/CDH15/CDH17/CDH19/CDH3/CDH5/CDH6/CEACAM1/CEACAM5/CEACAM6/CLDN1/CLDN11/CLDN14/CLDN18/CLDN19/CLDN23/CLDN3/CLDN4/CLDN5/CLDN6/CLDN7/CLDN9/CNTN4/CNTN6/DSC2/DSC3/DSG2/DSG3/DSG4/FXYD5/GATA5/HMCN1/HMCN2/ICAM1/IL1RAP/ITGA5/ITGAL/ITGAM/ITGB2/KLF4/MPZ/MPZL2/MYADM/PCDH18/PCDHGA3/PECAM1/PSG5/PTK7/PTPRT/ROBO4/SELP/SPARCL1/TGFB2/TGFBR2	63
445	Up	GO:0003177	pulmonary valve development	13/2245	23/18888	0.565217	4.75538	6.61855	3.28731e-07	4.25434e-06	2.57585e-06	BMP4/GJA5/HEY2/HEYL/JAG1/NFATC1/NOS3/SLIT2/SMAD6/STRA6/TBX20/TGFB2/TNFRSF1B	13
446	Up	GO:0016338	calcium-independent cell-cell adhesion via plasma membrane cell-adhesion molecules	13/2245	23/18888	0.565217	4.75538	6.61855	3.28731e-07	4.25434e-06	2.57585e-06	BMP2/CLDN1/CLDN11/CLDN14/CLDN18/CLDN19/CLDN23/CLDN3/CLDN4/CLDN5/CLDN6/CLDN7/CLDN9	13
447	Up	GO:0009914	hormone transport	70/2245	322/18888	0.217391	1.82899	5.51052	3.30165e-07	4.26334e-06	2.5813e-06	ADCYAP1/AGT/AGTR1/ALOX5/ANO1/ANXA1/AQP1/CCL5/CFTR/CGA/CYP19A1/DAB2/EDN3/F2/F2RL1/FAM3B/FGA/FGB/FGF23/FGG/FOXA2/FOXD1/FOXO1/FZD4/GAL/GATA3/GCG/GJA1/GPER1/HFE/HLA-DRB1/HNF1A/HNF1B/HNF4A/HTR1A/IL11/IL1B/ILDR1/ITPR1/KCNQ1/LYN/MAFA/MC4R/MTNR1B/NKX3-1/NKX6-1/NR1H4/OPRK1/ORAI1/PAX8/PCK2/PDX1/POMC/PPARG/RAB11FIP1/RBP4/REN/RFX6/SERPINA7/SLC22A9/SLC2A2/SLC7A8/SLCO1B1/SPINK1/TBX3/TCIRG1/TFAP2B/TRH/TRPV4/VAM…	70
448	Up	GO:0007584	response to nutrient	43/2245	164/18888	0.262195	2.20594	5.6967	3.47494e-07	4.47229e-06	2.70781e-06	A2M/ALDH1A2/AQP3/CD40/COL1A1/CYBB/CYP1A1/CYP1B1/CYP26A1/EPO/F5/F7/FABP1/FES/FGF23/FOLR1/FOLR2/FOXA2/GATA4/GCGR/HMGCS2/IL1A/KANK2/KYNU/LRAT/MLXIPL/NFKBIZ/NOD2/NQO1/NR1H4/OTC/PDX1/PKLR/PLD1/POSTN/PPARG/SNAI2/SST/STC1/STC2/TNFRSF11B/VDR/XBP1	43
449	Up	GO:0035050	embryonic heart tube development	28/2245	86/18888	0.325581	2.73923	5.93717	3.48671e-07	4.47229e-06	2.70781e-06	APELA/APLNR/ASB2/ECE1/EDNRA/FGF8/FOLR1/FOXC1/FOXC2/FOXH1/GATA4/GJA1/HAND1/HAND2/IHH/LBX1/OVOL2/PITX2/SHH/SOX17/SOX18/TBX2/TBX20/TBX3/TGFBR2/WNT3A/WNT5A/YAP1	28
450	Up	GO:0048864	stem cell development	28/2245	86/18888	0.325581	2.73923	5.93717	3.48671e-07	4.47229e-06	2.70781e-06	ALDH1A2/BMP4/CYP26C1/EDN3/EDNRA/EDNRB/FN1/FOLR1/FOXC1/FOXC2/GBX2/GDNF/HAND2/JAG1/LAMA5/NRP1/NRTN/OVOL2/PHOX2B/PITX2/PTPRC/SEMA3B/SEMA3D/SEMA3G/SHH/SNAI2/SOX10/TWIST1	28
451	Up	GO:0046638	positive regulation of alpha-beta T cell differentiation	21/2245	54/18888	0.388889	3.27186	6.14019	3.56708e-07	4.56523e-06	2.76408e-06	ANXA1/CD86/HLA-DRB1/HLX/IHH/IL18/IL2RG/IL4R/NCKAP1L/NFKBIZ/RUNX1/RUNX3/SASH3/SHH/SOCS1/SYK/TGFBR2/TNFSF4/ZAP70/ZBTB16/ZBTB7B	21
452	Up	GO:0032970	regulation of actin filament-based process	80/2245	385/18888	0.207792	1.74823	5.44777	3.57941e-07	4.57087e-06	2.7675e-06	ACTA2/ALOX15/APOA1/ARAP1/ARHGAP28/ARHGAP6/ARHGEF15/ARHGEF19/ARHGEF5/BAIAP2L1/BMP10/BST2/CAPG/CAV1/CDC42EP1/CDC42EP5/CGNL1/CSF1R/CTNNA3/CXCL12/DAAM2/DLC1/DSC2/DSG2/DSP/EPHA1/F11R/F2RL1/FMN1/FRMD6/FZD10/GATA4/GJA5/GRHL3/GSN/HCK/HCLS1/HRG/IL1A/KANK2/KANK4/KCNJ2/LMOD1/LMOD3/LPAR1/MET/MYADM/MYLK3/NCKAP1L/NPHS1/NRP1/ODAM/PDGFRA/PHLDB2/PKP2/PLEK/PTGER4/PYCARD/RGCC/RGS4/RHOD/RHOF/RHOG/S100A10/SCIN/SDC4/S…	80
453	Up	GO:0046631	alpha-beta T cell activation	46/2245	181/18888	0.254144	2.1382	5.65107	3.67571e-07	4.66799e-06	2.8263e-06	ANXA1/ASCL2/CARD11/CD28/CD300A/CD3D/CD3G/CD55/CD86/DOCK2/EBI3/ELF4/FOSL2/GATA3/HFE/HLA-DRB1/HLA-E/HLX/IHH/IL18/IL18R1/IL2RG/IL4R/IL6R/LEF1/NCKAP1L/NFKBIZ/NKX2-3/PRDM1/PTGER4/PTPRC/RUNX1/RUNX3/SASH3/SHH/SOCS1/SPN/STAT6/SYK/TCIRG1/TGFBR2/TNFSF4/WDFY4/ZAP70/ZBTB16/ZBTB7B	46
454	Up	GO:0042698	ovulation cycle	25/2245	72/18888	0.347222	2.92131	5.99892	3.68781e-07	4.66799e-06	2.8263e-06	A2M/ADAMTS1/AFP/CGA/CYP1B1/EREG/FSHR/FZD4/GAS2/GDF10/HAS2/MDK/MMP2/NHLH2/NOS3/NR5A1/OPRK1/PDGFRA/PGR/SERPINF1/SLIT2/SLIT3/TGFB2/TNFAIP6/ZP3	25
455	Up	GO:0050766	positive regulation of phagocytosis	25/2245	72/18888	0.347222	2.92131	5.99892	3.68781e-07	4.66799e-06	2.8263e-06	AHSG/APOA1/APOA2/C3/C4B/CD36/CLEC7A/CYBA/DOCK2/F2RL1/FCER1G/FCGR2A/FCN1/GATA2/IL2RB/IL2RG/MBL2/NCKAP1L/NOD2/PLA2G5/PLCG2/PTPRC/PYCARD/TREM2/TULP1	25
456	Up	GO:0060411	cardiac septum morphogenesis	25/2245	72/18888	0.347222	2.92131	5.99892	3.68781e-07	4.66799e-06	2.8263e-06	APLNR/BMP4/BMP5/FGF8/GATA4/GATA6/HAND1/HEY2/HEYL/JAG1/MSX2/NOS3/NRP1/SLIT2/SLIT3/SMAD6/TBX2/TBX20/TBX3/TBX5/TGFB2/TGFBR2/TGFBR3/WNT11/WNT5A	25
457	Up	GO:1903038	negative regulation of leukocyte cell-cell adhesion	40/2245	148/18888	0.27027	2.27388	5.71412	3.73162e-07	4.71311e-06	2.85362e-06	ADTRP/ANXA1/ARG1/ASCL2/BMP4/CD300A/CD74/CD86/CEBPB/CXCL12/FGL1/FGL2/GPNMB/HFE/HLA-DRB1/HLA-E/HLA-G/HLX/IDO1/IHH/IL4R/KLF4/LAPTM5/LGALS3/LILRB2/LRRC32/MDK/PLA2G2A/PLA2G5/PTPN6/RUNX1/RUNX3/SDC4/SHH/SOCS1/SPN/TNFSF4/VSIG4/VTCN1/ZBTB7B	40
458	Up	GO:0002700	regulation of production of molecular mediator of immune response	47/2245	187/18888	0.251337	2.11459	5.6257	3.91388e-07	4.93252e-06	2.98646e-06	ACP5/ANGPT1/APOA1/APOA2/ARG1/BST2/CD244/CD28/CD36/CD55/CD74/CD86/CLC/CLEC7A/F2RL1/GATA3/HFE/HLA-E/HLA-G/HPX/IL18/IL18R1/IL1B/IL1R1/IL4R/LAPTM5/NOD1/NOD2/PLCG2/PRG2/PTPRC/PYCARD/RBP4/SASH3/SPON2/STAT6/SYK/TGFB1/TGFB2/TICAM1/TLR4/TNFRSF1B/TNFSF4/TRIM6/TWIST1/WNT5A/XBP1	47
459	Up	GO:0110110	positive regulation of animal organ morphogenesis	16/2245	34/18888	0.470588	3.95923	6.34293	4.03112e-07	5.0692e-06	3.06921e-06	BMP2/BMP4/CD34/DKK1/FGF10/FGF8/GATA3/GATA5/GDNF/HOXA11/HOXC11/MSX1/NGFR/SIX1/SIX4/WNT2	16
460	Up	GO:0042742	defense response to bacterium	71/2245	330/18888	0.215152	1.81015	5.45292	4.13008e-07	5.18235e-06	3.13772e-06	ACP5/ANXA3/AQP1/CASP4/CD36/CD4/CEBPB/COLEC12/CXCL6/CYBA/EMILIN1/EMILIN2/F2/F2RL1/FCER1G/FGA/FGB/GBP2/GBP4/GRN/GSDMD/HLA-E/HP/IL18/IL1B/IL22RA1/IL6R/IRF8/ISG15/LBP/LGALS4/LYZ/MBL2/MPEG1/MPO/MR1/NFKBIZ/NLRP1/NOD1/NOD2/NR1H4/OAS1/OAS2/OAS3/PLA2G2A/PLAC8/PPBP/PRG2/PYCARD/RARRES2/RNASE1/RNASE6/RPL39/S100A14/SELP/SERPINE1/SHC1/SLC9A9/SLPI/SPN/SPON2/STAB1/STAB2/SYK/TF/TLR2/TLR4/TLR6/TREM2/WFDC2/ZG16	71
461	Up	GO:0051250	negative regulation of lymphocyte activation	43/2245	165/18888	0.260606	2.19257	5.65084	4.16616e-07	5.21629e-06	3.15827e-06	ANXA1/ARG1/ASCL2/BMP4/CD300A/CD74/CD86/CEBPB/FGL1/FGL2/GAL/GPNMB/HFE/HLA-DRB1/HLA-E/HLA-G/HLX/ID2/IDO1/IHH/IL4R/LAPTM5/LGALS3/LILRB2/LRRC32/LYN/MDK/MNDA/PLA2G2A/PLA2G5/PTPN6/RUNX1/RUNX3/SDC4/SHH/SOCS1/SPN/TNFAIP3/TNFSF4/TYROBP/VSIG4/VTCN1/ZBTB7B	43
462	Up	GO:0061383	trabecula morphogenesis	19/2245	46/18888	0.413043	3.47508	6.17276	4.23406e-07	5.28982e-06	3.20279e-06	ADAMTS1/BMP10/BMP5/CHAD/COL1A1/FBN2/FHL2/FOXH1/GREM1/HEY2/MMP2/MSX2/OVOL2/RBP4/SLC40A1/TEK/TGFB2/TGFBR3/WNT10B	19
463	Up	GO:0042119	neutrophil activation	18/2245	42/18888	0.428571	3.60573	6.20895	4.38741e-07	5.46196e-06	3.30702e-06	ANXA1/ANXA3/CCL5/CD177/CD300A/CXCL6/DNASE1L3/F2RL1/FCER1G/GRN/IL18/ITGAM/ITGB2/PLA2G2A/SPI1/STXBP2/SYK/TYROBP	18
464	Up	GO:0019882	antigen processing and presentation	34/2245	117/18888	0.290598	2.44491	5.75789	4.39076e-07	5.46196e-06	3.30702e-06	ACE/CD74/CTSE/CTSF/CTSH/CTSV/FCER1G/FGL2/HFE/HLA-C/HLA-DMB/HLA-DOA/HLA-DPA1/HLA-DQB1/HLA-DQB2/HLA-DRB1/HLA-E/HLA-G/ICAM1/IFI30/LILRB2/MICB/MPEG1/MR1/NOD1/NOD2/PYCARD/RAB32/RAB34/TAPBPL/THBS1/TREM2/UNC93B1/WDFY4	34
465	Up	GO:0043434	response to peptide hormone	88/2245	438/18888	0.200913	1.69036	5.36891	4.44451e-07	5.51693e-06	3.3403e-06	ACE/ADM/AGT/AGTR1/AGTR2/AGTRAP/AHSG/AREG/BCAR3/CA2/CAV1/CAV2/CEACAM1/COL1A1/COL3A1/COL6A1/CPS1/CXCL12/CYBB/CYP11A1/CYP1B1/DDR2/ECHDC3/EDNRA/EDNRB/EGR2/ENPP1/EREG/F7/FBN1/FBP1/FOXC2/FOXO1/GAL/GCG/GCGR/GCNT1/GDF15/GH1/GHR/GJB2/GPER1/HMGCS2/HSD11B2/IGF2/IGFBP5/IL1B/KCNQ1/LYN/MC4R/NEFL/NKX6-1/NR1H4/NR5A1/OPRK1/OTC/OTOP1/PCK1/PCK2/PCSK9/PKLR/POMC/POU4F2/PPARG/RARRES2/SCNN1A/SERPINA12/SHC1/SLC2A1/SLC2A…	88
466	Up	GO:0043616	keratinocyte proliferation	22/2245	59/18888	0.372881	3.13719	6.03849	4.46961e-07	5.52432e-06	3.34478e-06	AREG/CDH3/EPPK1/EREG/FERMT1/FGF10/FST/HAS2/IRF6/KLK8/LRG1/MDK/NFKBIZ/OVOL1/OVOL2/SDR16C5/SFN/SNAI2/TP63/VDR/YAP1/ZFP36	22
467	Up	GO:0090497	mesenchymal cell migration	22/2245	59/18888	0.372881	3.13719	6.03849	4.46961e-07	5.52432e-06	3.34478e-06	BMP4/EDN3/EDNRA/EDNRB/FN1/FOLR1/GBX2/GDNF/HAND2/LAMA5/NRP1/NRTN/OVOL2/PHOX2B/PITX2/SEMA3B/SEMA3D/SEMA3G/SHH/SOX10/TPBG/TWIST1	22
468	Up	GO:0010594	regulation of endothelial cell migration	55/2245	234/18888	0.235043	1.9775	5.52602	4.48535e-07	5.53193e-06	3.34938e-06	ACVRL1/ADAMTS9/AGT/AGTR2/ANGPT1/ANGPT2/ANGPT4/ANXA1/ANXA3/APOE/APOH/BMP10/CARD10/CCBE1/CD40/CEACAM1/DCN/ETS1/FGF18/FGF4/FGFBP1/FOXC2/GATA2/GATA3/GRN/HMOX1/HRG/KDR/KLF4/MEOX2/MET/NOS3/NR2F2/NRP1/PLG/PPARG/RGCC/RRAS/SASH1/SERPINF1/SH3BP1/SLIT2/SMOC2/SP100/SPARC/SRPX2/STARD13/STAT5A/STC1/TEK/TGFB1/TGFBR3/THBS1/VEGFC/WNT5A	55
469	Up	GO:0016053	organic acid biosynthetic process	72/2245	337/18888	0.21365	1.79751	5.42554	4.54698e-07	5.59598e-06	3.38816e-06	ACMSD/ACOX2/ACSM1/ACSM2A/ACSM2B/ACSM3/AGXT/AGXT2/AKR1D1/ALDH1A1/ALDH1A2/ALDH1A3/ALOX15/ALOX15B/ALOX5/ALOX5AP/APOA4/APOA5/APOC1/APOC3/AVP/AVPR1A/BHMT/CARNS1/CD74/CEACAM1/CES1/CPS1/CYP1A1/CYP27A1/CYP2C9/CYP8B1/DSE/ELOVL7/FA2H/FADS6/FMO1/FMO3/GGT5/GLUD2/HAAO/HOGA1/HPGDS/IDO1/IL1B/KYNU/LIPC/MALRD1/MGST2/MLXIPL/MRI1/NR1H4/OTC/PAH/PKLR/PLA2G4A/PLA2G4F/PLA2G5/PLP1/PTGDS/PTGIS/PTGS1/PYCARD/PYCR1/SDSL/SLC…	72
470	Up	GO:0009913	epidermal cell differentiation	57/2245	246/18888	0.231707	1.94944	5.50506	4.61656e-07	5.66952e-06	3.43269e-06	ALOX15B/ANXA1/AQP3/ATOH1/BMP4/CDH3/CLRN1/CNFN/DLX3/DSG4/DSP/EREG/ESRP1/ETV4/FA2H/FGF20/FLG/FLNB/FOSL2/FOXC1/FOXI3/GATA6/GDF3/GLI1/GRHL2/GRXCR1/HEY2/HOXA7/IL1A/IRF6/JAG1/KCNQ1/KLF4/KRT16/KRT3/KRT7/MCOLN3/MSX2/MYO7A/NFKBIZ/OPN3/OVOL1/OVOL2/PITX2/POU2F3/POU4F3/PPL/SFN/SLC39A2/SLC44A4/ST14/TP63/USH1C/VDR/WNT5A/YAP1/ZFP36	57
471	Up	GO:0006959	humoral immune response	59/2245	258/18888	0.228682	1.92399	5.48836	4.68527e-07	5.7417e-06	3.47639e-06	A2M/ALOX5/C1QA/C1QB/C1QC/C3/C4B/C4BPB/C7/C8A/C8B/CD28/CD55/CFB/CFH/CR1L/CXCL1/CXCL14/CXCL2/CXCL3/CXCL6/EBI3/F2/FCN1/FGA/FGB/GATA3/GATA6/HLA-DQB1/HLA-DRB1/HLA-E/HPX/HRG/IL1B/LGALS4/LYZ/MBL2/NOD2/PF4/PPBP/PRSS2/PRSS3/PRTN3/PTPN6/PTPRC/RARRES2/RGCC/RNASE6/RPL39/SERPING1/SLPI/SPON2/SVEP1/TF/TREM2/TSLP/VSIG4/WFDC2/ZP3	59
472	Up	GO:0019755	one-carbon compound transport	14/2245	27/18888	0.518519	4.36248	6.42146	4.77995e-07	5.84531e-06	3.53913e-06	AQP1/AQP10/AQP3/AQP7/CA2/HBA1/HBA2/HBE1/HBG1/HBG2/HBZ/RHBG/SLC14A1/UPK3A	14
473	Up	GO:0071674	mononuclear cell migration	50/2245	206/18888	0.242718	2.04208	5.52327	5.30416e-07	6.47072e-06	3.91779e-06	ADTRP/AIF1/ALOX5/ANXA1/ARHGEF5/ASB2/ASCL2/BMP5/C3AR1/CCL3/CCL3L3/CCL5/CCR1/CMKLR1/CSF1R/CX3CR1/CXCL12/DOCK8/F11R/FLT1/GATA3/GCSAM/GREM1/ICAM1/IL34/IL6R/ITGA4/ITGAL/ITGB7/LGALS3/LYN/MDK/MYO1G/NLRP12/PADI2/PECAM1/PLA2G7/PLG/PYCARD/RARRES2/RIPK3/S100A14/SERPINE1/SLIT2/SPN/THBS1/TNFRSF11A/TRPV4/WNT5A/ZAP70	50
474	Up	GO:0001885	endothelial cell development	23/2245	64/18888	0.359375	3.02355	5.95556	5.3138e-07	6.47072e-06	3.91779e-06	CDH5/CLDN1/CLDN3/CLDN5/COL18A1/COL27A1/EDNRA/EDNRB/F11R/F2RL1/HOXA13/HPSE/ICAM1/IL1B/MARVELD2/MET/MYADM/PECAM1/PROC/ROBO4/SOX18/STC1/TJP3	23
475	Up	GO:0071695	anatomical structure maturation	61/2245	271/18888	0.225092	1.89378	5.44297	5.37013e-07	6.52555e-06	3.95099e-06	ACTN3/ACVRL1/ADAMTS12/ALDH1A2/BMP2/BNC1/C1QA/C3/CDH3/CDH5/CDKN1C/CEBPA/CFTR/CLEC7A/CX3CR1/DMC1/EDNRA/EDNRB/EPAS1/EPO/EREG/FERMT1/FGG/FOXA1/GAL/GATA2/GATA3/GH1/GJA1/GREM1/HOXA5/IGF1/IHH/KDR/LRRK2/LYL1/MMP2/MSX2/NKX6-1/PAX2/PGR/PHOSPHO1/PPARG/PTH1R/RAC2/REN/ROPN1/RUNX2/RXFP2/SLC26A3/SOX10/SOX18/SPINK1/TAL1/TFCP2L1/TGFB2/TUBB8/WNT1/WNT10B/WNT5A/ZBTB16	61
476	Up	GO:0051384	response to glucocorticoid	37/2245	134/18888	0.276119	2.32309	5.64507	5.67877e-07	6.88611e-06	4.16929e-06	A2M/ACE/ADM/ANXA1/ANXA3/APOA2/AQP1/AREG/AVPR1A/CLDN1/CPN1/CPS1/CYP1B1/EPO/FIBIN/FOSL2/GHR/GJB2/HMGCS2/HSD11B2/IGFBP7/MAOB/NEFL/PAPPA/PCK1/PCK2/PDX1/PTGDS/SERPINF1/SLIT2/SLIT3/SSTR3/STC1/TAT/TBX2/TRIM63/ZFP36	37
477	Up	GO:0001892	embryonic placenta development	28/2245	88/18888	0.318182	2.67698	5.79114	5.93921e-07	7.18682e-06	4.35136e-06	ADM/ASCL2/BMP5/CDKN1C/CDX2/CDX4/CEBPA/CEBPB/EPAS1/GATA2/GRHL2/HAND1/HEY2/IGF2/KRT19/KRT8/LEF1/MDFI/NR2F2/OVOL2/PHLDA2/PLG/PRDM1/RSPO3/SNAI1/SPINT1/ST14/WNT2	28
478	Up	GO:0031960	response to corticosteroid	41/2245	156/18888	0.262821	2.2112	5.57907	6.02625e-07	7.27689e-06	4.40589e-06	A2M/ACE/ADM/ANXA1/ANXA3/APOA2/AQP1/AREG/AVPR1A/CLDN1/CPN1/CPS1/CYBB/CYP1B1/EPO/FIBIN/FOSL2/GHR/GJB2/GPER1/HMGCS2/HSD11B2/IGFBP7/MAOB/NEFL/PAPPA/PCK1/PCK2/PDX1/PTGDS/PTPRC/SCNN1A/SERPINF1/SLIT2/SLIT3/SSTR3/STC1/TAT/TBX2/TRIM63/ZFP36	41
479	Up	GO:0045444	fat cell differentiation	57/2245	248/18888	0.229839	1.93372	5.43615	6.1182e-07	7.37249e-06	4.46378e-06	ADIRF/ADRB3/ALOX5/BMP2/CCDC3/CCND1/CEBPA/CEBPB/CEBPD/CMKLR1/EBF2/EGR2/ENPP1/FGF10/FOSL2/FOXO1/FRZB/GATA2/GDF10/GDF3/GDF6/GPER1/HMGA2/ID2/IL11/JAG1/KLF4/KLF5/LAMB3/LRG1/MB/MSX2/PDGFRA/PLAC8/PPARG/RARRES2/RREB1/SIX1/SLC2A4/SMAD6/SNAI2/SOCS1/SOX13/SULT1E1/TFAP2B/TGFB1/TRPV4/WIF1/WNT1/WNT10B/WNT3A/WNT5A/XBP1/YAP1/ZBTB16/ZBTB7B/ZFP36	57
480	Up	GO:0048806	genitalia development	19/2245	47/18888	0.404255	3.40115	6.05326	6.31748e-07	7.59677e-06	4.59957e-06	BMP5/CYP19A1/FGF10/FGF8/FOXF2/HOXA13/HOXD13/HSD17B3/LGR4/NEUROG1/PDGFRA/RBP4/ROR2/SHH/STRA6/TBX3/TP63/WNT5A/WT1	19
481	Up	GO:0090103	cochlea morphogenesis	13/2245	24/18888	0.541667	4.55724	6.40436	6.38969e-07	7.66762e-06	4.64247e-06	CTHRC1/EYA1/FRZB/GRHL3/HOXA1/HPN/NEUROG1/PAX2/PTK7/SIX1/TBX18/TBX2/WNT5A	13
482	Up	GO:0048333	mesodermal cell differentiation	16/2245	35/18888	0.457143	3.84611	6.18969	6.60673e-07	7.91163e-06	4.79021e-06	BMP4/DKK1/EYA1/EYA2/FOXC2/FOXF1/GJA1/HMGA2/HOXA11/ITGA8/ITGB4/KLF4/PAX2/SIX2/TAL1/WNT3A	16
483	Up	GO:0043297	apical junction assembly	26/2245	79/18888	0.329114	2.76895	5.78657	7.15506e-07	8.53285e-06	5.16633e-06	ACVRL1/CDH5/CLDN1/CLDN11/CLDN14/CLDN18/CLDN19/CLDN23/CLDN3/CLDN4/CLDN5/CLDN6/CLDN7/CLDN9/F11R/FRMPD2/GPBAR1/GRHL2/MARVELD2/MARVELD3/OCLN/PECAM1/POF1B/SNAI1/SNAI2/WNT11	26
484	Up	GO:0043299	leukocyte degranulation	26/2245	79/18888	0.329114	2.76895	5.78657	7.15506e-07	8.53285e-06	5.16633e-06	ANXA3/CCL3/CD177/CD300A/CD84/CEACAM1/F2RL1/FES/FOXF1/GATA2/HCK/IL4R/ITGAM/ITGB2/KLRC2/LYN/MILR1/NCKAP1L/PTGDR/PTGDS/RAC2/S100A13/SPI1/STXBP2/SYK/VAMP8	26
485	Up	GO:0030225	macrophage differentiation	23/2245	65/18888	0.353846	2.97704	5.86409	7.30389e-07	8.65669e-06	5.24131e-06	BMP4/C1QC/CASP10/CD4/CEBPA/CSF1R/FOSL2/GAB3/GATA2/GATA3/HCLS1/HLA-DRB1/ID2/IL31RA/IL34/NKX2-3/NRROS/PF4/ROR2/SOCS1/TGFB1/TLR2/TLR4	23
486	Up	GO:0035904	aorta development	23/2245	65/18888	0.353846	2.97704	5.86409	7.30389e-07	8.65669e-06	5.24131e-06	ACVRL1/ADAMTS9/APLNR/COL3A1/EDNRA/EGR2/EYA1/FGF8/FKBP10/FOXH1/HEY2/JAG1/LOXL1/MYLK/NGFR/NKX3-1/PRDM1/SIX1/SMAD6/TBX2/TFAP2B/TGFB2/TGFBR2	23
487	Up	GO:1904036	negative regulation of epithelial cell apoptotic process	23/2245	65/18888	0.353846	2.97704	5.86409	7.30389e-07	8.65669e-06	5.24131e-06	ANGPT1/ANGPTL4/ATOH1/CDH5/FGA/FGB/FGG/GATA2/GATA3/HAND2/ICAM1/KDR/MDK/NDNF/NUPR1/PDX1/PKHD1/SERPINB13/SERPINE1/TEK/TERT/TNFAIP3/YAP1	23
488	Up	GO:0042487	regulation of odontogenesis of dentin-containing tooth	9/2245	12/18888	0.75	6.31002	6.75781	7.32618e-07	8.66531e-06	5.24653e-06	APCDD1/BMP2/BMP4/FGF8/NGFR/RSPO2/RUNX2/TNFRSF11B/WNT10A	9
489	Up	GO:0030098	lymphocyte differentiation	86/2245	432/18888	0.199074	1.67488	5.21165	8.95059e-07	1.0565e-05	6.39672e-06	ANXA1/ASCL2/BMP4/CARD11/CD28/CD3D/CD3G/CD4/CD74/CD79B/CD86/CDH17/CMTM7/DOCK2/FCER1G/FGL2/FOSL2/GATA3/HHEX/HLA-DOA/HLA-DRB1/HLA-G/HLX/ID2/IHH/IL11/IL18/IL18R1/IL1A/IL1B/IL2RG/IL4R/IL6R/IRF8/ITGA4/ITM2A/LCK/LEF1/LEPR/LGALS1/LILRB2/LYL1/MDK/MMP14/MR1/NCKAP1L/NFKBIZ/NKX2-3/NTRK1/ONECUT1/PCK1/PIK3R6/PLCG2/PRDM1/PTGER4/PTPN6/PTPRC/RAG1/RHOH/RIPK3/RUNX1/RUNX2/RUNX3/SASH3/SHH/SMARCD2/SOCS1/SOX13/SPI1/SPN…	86
490	Up	GO:0008406	gonad development	54/2245	233/18888	0.23176	1.94988	5.35824	9.09358e-07	1.07119e-05	6.48565e-06	A2M/ACE/ADAMTS1/AFP/AMHR2/CEBPB/CGA/CYP19A1/CYP1B1/DHH/DMC1/EREG/FGF8/FOXC1/FSHR/FST/FZD4/GAS2/GATA3/GATA4/GATA6/GJA1/HOXA10/HOXA11/HOXA9/IL1A/IRX5/KDR/LHX9/MMP14/MMP2/NHLH2/NKX3-1/NOS3/NR2F2/NR5A1/NTRK1/NUPR1/OSR1/PDGFRA/PGR/REN/RXFP2/SIX4/SLIT2/SLIT3/TCF21/TGFB2/TNFAIP6/UTF1/WNT5A/WT1/ZFP42/ZP3	54
491	Up	GO:0003198	epithelial to mesenchymal transition involved in endocardial cushion formation	10/2245	15/18888	0.666667	5.60891	6.55839	9.4062e-07	1.10351e-05	6.68134e-06	FGF8/HEY2/HEYL/MSX1/MSX2/SNAI1/SNAI2/TGFB2/TGFBR2/TMEM100	10
492	Up	GO:0071639	positive regulation of monocyte chemotactic protein-1 production	10/2245	15/18888	0.666667	5.60891	6.55839	9.4062e-07	1.10351e-05	6.68134e-06	CD84/CLEC7A/IL1B/MCOLN2/NOD2/OAS1/OAS3/SYK/TRPV4/TWIST1	10
493	Up	GO:0090100	positive regulation of transmembrane receptor protein serine/threonine kinase signaling pathway	31/2245	105/18888	0.295238	2.48395	5.6002	9.56189e-07	1.1195e-05	6.77815e-06	ACVRL1/BMP10/BMP2/BMP4/BMP5/CDH5/CDKN1C/DAB2/FERMT1/FOXD1/GATA4/GATA6/GDF6/GDF7/GPC3/HFE/ITGA8/KCP/KDR/LRG1/MSX1/MSX2/MYOCD/NPNT/SULF1/TBX20/TGFB1/TGFB2/TGFBR2/TGFBR3/THBS1	31
494	Up	GO:0006805	xenobiotic metabolic process	35/2245	126/18888	0.277778	2.33705	5.53052	9.74338e-07	1.13633e-05	6.88007e-06	AADAC/ABCC2/ABCC3/ACSM1/ACSM2B/AHR/AOX1/CRYZ/CYP1A1/CYP1B1/CYP26A1/CYP2C9/CYP2J2/CYP2S1/CYP2W1/CYP4F12/FMO1/FMO2/FMO4/FMO5/GSTA1/GSTA2/HNF4A/NAT1/NAT2/NQO1/SLC22A7/SLCO1A2/SLCO1B1/SLCO2B1/SULT1A1/SULT1A2/SULT2A1/UGT2B11/UGT2B7	35
495	Up	GO:0045069	regulation of viral genome replication	27/2245	85/18888	0.317647	2.67248	5.67585	9.74504e-07	1.13633e-05	6.88007e-06	APOBEC3B/APOBEC3C/APOBEC3D/APOBEC3F/APOBEC3G/APOBEC3H/BST2/CCL5/CD28/HMGA2/IFI16/IFIT1/IFITM1/IFITM2/IFITM3/ISG15/ISG20/MX1/NR5A2/OAS1/OAS2/OAS3/OASL/PLSCR1/SLPI/TRIM38/TRIM6	27
496	Up	GO:2001237	negative regulation of extrinsic apoptotic signaling pathway	30/2245	100/18888	0.3	2.52401	5.61204	9.79526e-07	1.13988e-05	6.90158e-06	BMP4/BMP5/COL2A1/EYA1/EYA2/FAIM/FGA/FGB/FGF10/FGG/GDNF/HGF/HMOX1/ICAM1/IFI6/IGF1/IL1A/IL1B/LGALS3/NOS3/NRP1/PF4/SERPINE1/SNAI2/TERT/THBS1/TMBIM1/TNFAIP3/UNC5B/YAP1	30
497	Up	GO:0061036	positive regulation of cartilage development	15/2245	32/18888	0.46875	3.94376	6.12107	9.9268e-07	1.15287e-05	6.98019e-06	ACVRL1/BMP1/BMP10/BMP2/BMP4/FGF18/GDF6/HOXA11/LOXL2/MDK/PKDCC/PRKG2/RUNX2/WNT5A/ZBTB16	15
498	Up	GO:1905521	regulation of macrophage migration	18/2245	44/18888	0.409091	3.44183	5.95565	1.00966e-06	1.17023e-05	7.08535e-06	C3AR1/CCL3/CCL5/CD9/CMKLR1/CSF1R/CX3CR1/CYP19A1/EMILIN1/IL34/MDK/MMP14/MMP28/P2RY12/RARRES2/THBS1/TREM2/TRPV4	18
499	Up	GO:0001755	neural crest cell migration	21/2245	57/18888	0.368421	3.09966	5.83074	1.02529e-06	1.18597e-05	7.18062e-06	BMP4/EDN3/EDNRA/EDNRB/FN1/FOLR1/GBX2/GDNF/HAND2/LAMA5/NRP1/NRTN/OVOL2/PHOX2B/PITX2/SEMA3B/SEMA3D/SEMA3G/SHH/SOX10/TWIST1	21
500	Up	GO:0030510	regulation of BMP signaling pathway	34/2245	121/18888	0.280992	2.36409	5.52854	1.03731e-06	1.19747e-05	7.25023e-06	ACVRL1/BAMBI/BMP4/CDH5/CER1/DKK1/FBN1/FOXD1/FST/GATA4/GATA6/GDF3/GPC3/GREM1/HOXA13/HTRA3/KCP/KDR/MSX1/MSX2/PCSK6/PPARG/RBPMS2/SKOR2/SMAD6/SOST/SOSTDC1/SULF1/TBX20/TFAP2B/TMPRSS6/TNFAIP6/WNT1/WNT5A	34
501	Up	GO:1905332	positive regulation of morphogenesis of an epithelium	16/2245	36/18888	0.444444	3.73927	6.04201	1.05812e-06	1.21905e-05	7.38091e-06	AGT/AGTR2/BMP4/GATA3/GDNF/GJA1/GREM1/HOXB7/ITGAX/LBX2/LGR4/MDK/PAX2/PAX8/SIX1/SIX4	16
502	Up	GO:0035051	cardiocyte differentiation	42/2245	165/18888	0.254545	2.14158	5.40923	1.11199e-06	1.27856e-05	7.74124e-06	ACTC1/ALPK2/ALPK3/ASB2/BMP10/BMP2/BMP4/COL14A1/DKK1/EDNRA/FHL2/FOLR1/GATA4/GATA6/GPER1/GREM1/HAND2/HEY2/IGF1/IRX3/JAG1/MYLK3/MYOCD/NOX4/NRAP/PDGFRA/PITX2/PRKG1/RGS4/SHOX2/SOX17/SOX18/TBX18/TBX2/TBX3/TBX5/TGFB1/TGFB2/TGFBR3/TWIST1/WNT3A/WT1	42
503	Up	GO:0003071	renal system process involved in regulation of systemic arterial blood pressure	13/2245	25/18888	0.52	4.37495	6.20163	1.18603e-06	1.35829e-05	8.22393e-06	AGT/AGTR1/AGTR2/CYP4F12/EDNRB/F2RL1/GJA5/HSD11B2/OR51E2/PCSK5/REN/SERPINF2/SUCNR1	13
504	Up	GO:0003081	regulation of systemic arterial blood pressure by renin-angiotensin	13/2245	25/18888	0.52	4.37495	6.20163	1.18603e-06	1.35829e-05	8.22393e-06	ACE/AGT/AGTR1/AGTR2/CTSZ/EDNRB/ENPEP/F2RL1/OR51E2/PCSK5/REN/SERPINF2/SUCNR1	13
505	Up	GO:0042632	cholesterol homeostasis	30/2245	101/18888	0.29703	2.49902	5.5477	1.23646e-06	1.41323e-05	8.55661e-06	ACSM1/ACSM3/ANGPTL3/APOA1/APOA2/APOA4/APOA5/APOB/APOC3/APOE/APOM/CAV1/CES1/DGAT2/EPHX2/HNF4A/IL18/LDLRAP1/LIPC/MALL/MALRD1/MTTP/MYLIP/NPC1L1/NR1H4/NR5A2/PCSK9/PLA2G12B/SOAT2/XBP1	30
506	Up	GO:0014902	myotube differentiation	36/2245	133/18888	0.270677	2.2773	5.42918	1.34926e-06	1.53652e-05	9.30309e-06	ACTN3/ADAM12/ADAMTS15/AVPR1A/B4GALNT2/BARX2/CAV2/CD53/CD9/CEACAM5/COL6A1/DOCK2/EHD2/ERVW-1/GDF15/IGF1/IL4R/KLF5/KLHL40/LMOD3/MMP14/MYOCD/NFATC2/NPHS1/P2RX2/PIEZO1/SHH/SHOX2/SIX1/SIX4/SMYD1/TANC1/TMEM119/WNT1/WNT10B/XBP1	36
507	Up	GO:0035272	exocrine system development	19/2245	49/18888	0.387755	3.26232	5.82368	1.34965e-06	1.53652e-05	9.30309e-06	EDAR/ESRP2/FGF10/FGF8/FOXC1/HGF/IGF2/LAMA5/NKX3-1/NRP1/PDX1/SHH/SNAI2/SOX10/TFCP2L1/TGFB1/TGFB2/TGM2/WLS	19
508	Up	GO:0046394	carboxylic acid biosynthetic process	70/2245	334/18888	0.209581	1.76328	5.16907	1.3688e-06	1.55525e-05	9.4165e-06	ACMSD/ACOX2/ACSM1/ACSM2A/ACSM2B/ACSM3/AGXT/AGXT2/AKR1D1/ALDH1A1/ALDH1A2/ALDH1A3/ALOX15/ALOX15B/ALOX5/ALOX5AP/APOA4/APOA5/APOC1/APOC3/AVP/AVPR1A/BHMT/CARNS1/CD74/CEACAM1/CES1/CPS1/CYP1A1/CYP27A1/CYP2C9/CYP8B1/DSE/ELOVL7/FA2H/FADS6/GGT5/GLUD2/HAAO/HOGA1/HPGDS/IDO1/IL1B/KYNU/LIPC/MALRD1/MGST2/MLXIPL/MRI1/NR1H4/OTC/PAH/PKLR/PLA2G4A/PLA2G4F/PLA2G5/PLP1/PTGDS/PTGIS/PTGS1/PYCARD/PYCR1/SDSL/SLC27A2/SLC45…	70
509	Up	GO:0060536	cartilage morphogenesis	8/2245	10/18888	0.8	6.73069	6.65737	1.41933e-06	1.60951e-05	9.74499e-06	HAND1/HAND2/HOXA5/MSX1/RSPO2/SNAI1/SNAI2/STC1	8
510	Up	GO:0099024	plasma membrane invagination	21/2245	58/18888	0.362069	3.04622	5.73211	1.42812e-06	1.61629e-05	9.78606e-06	AIF1/ALOX15/BIN2/C3/CD300A/CD36/F2RL1/GATA2/GSN/HAVCR1/ITGAM/ITGB2/MSR1/NCKAP1L/PLCG2/SH3BP1/THBS1/TIMD4/TREM2/XKR5/XKR8	21
511	Up	GO:0046683	response to organophosphorus	35/2245	128/18888	0.273438	2.30053	5.42229	1.45638e-06	1.64267e-05	9.94575e-06	AHR/AQP1/AREG/CFTR/COL1A1/CPS1/CYP1B1/DUOX2/ENPP1/FBP1/GATA6/HMGCS2/IGFBP5/IL1B/ITPR2/KCNQ1/LPAR1/NT5E/P2RX1/P2RX2/P2RX3/P2RX6/P2RY12/P2RY2/P2RY6/PCK1/PKLR/REN/SLC26A3/SLC6A3/STC1/TEK/THBD/WNT10B/WT1	35
512	Up	GO:0031348	negative regulation of defense response	63/2245	291/18888	0.216495	1.82145	5.18657	1.45816e-06	1.64267e-05	9.94575e-06	A2M/ACP5/AHR/ALOX5/APOA1/APOE/ARG1/CDH5/CEACAM1/CYP19A1/DHX58/ELF4/ENPP3/FGL2/FOXF1/GATA3/GPER1/GPR17/GRN/HCK/HGF/HLA-DRB1/HLA-E/HLA-G/IFI16/IGF1/IL22RA1/ISG15/KLF4/LYN/MDK/MICB/NLRC5/NLRP12/NMI/NOD2/NR1H4/NT5E/OAS1/OAS3/OTOP1/PPARG/PROC/PTGER4/PTGIS/PTPN6/PTPRC/RHBDF2/SERPINB9/SERPING1/SLC39A8/SPN/SYK/TEK/TGFB1/TNFAIP3/TNFAIP6/TNFRSF1B/TREM2/TRIM38/VSIG4/WFDC1/ZFP36	63
513	Up	GO:0048002	antigen processing and presentation of peptide antigen	24/2245	72/18888	0.333333	2.80445	5.63407	1.463e-06	1.64267e-05	9.94575e-06	ACE/CD74/CTSE/CTSF/CTSV/FCER1G/HFE/HLA-C/HLA-DMB/HLA-DOA/HLA-DPA1/HLA-DQB1/HLA-DQB2/HLA-DRB1/HLA-E/HLA-G/IFI30/MICB/MPEG1/MR1/PYCARD/TAPBPL/TREM2/UNC93B1	24
514	Up	GO:1903053	regulation of extracellular matrix organization	24/2245	72/18888	0.333333	2.80445	5.63407	1.463e-06	1.64267e-05	9.94575e-06	ADTRP/AEBP1/AGT/BMP2/COL6A1/CST3/DDR2/DPP4/EMILIN1/HAS2/LAMA2/LAMB1/LAMC1/NID1/PHLDB2/PPARG/RGCC/RUNX1/TCF15/TGFB1/TGFBR3/TIE1/TNFRSF1B/ZNF469	24
515	Up	GO:0003401	axis elongation	14/2245	29/18888	0.482759	4.06162	6.0599	1.46565e-06	1.64267e-05	9.94575e-06	AREG/BMP4/FGF10/HNF1B/HOXD13/NKD1/PTK7/SHH/SIX1/SIX4/WNT11/WNT3A/WNT5A/YAP1	14
516	Up	GO:0048701	embryonic cranial skeleton morphogenesis	18/2245	45/18888	0.4	3.36535	5.83445	1.49637e-06	1.67013e-05	1.0112e-05	BMP4/FGF8/FOXC2/GRHL2/HOXA1/HOXA2/IRX5/MMP14/PDGFRA/PRRX1/RUNX2/SIX1/SIX2/SIX4/TBX15/TFAP2A/TGFBR2/TWIST1	18
517	Up	GO:0030593	neutrophil chemotaxis	31/2245	107/18888	0.28972	2.43752	5.4767	1.49789e-06	1.67013e-05	1.0112e-05	C3AR1/CCL3/CCL3L3/CCL5/CD74/CSF3R/CXCL1/CXCL2/CXCL3/CXCL6/DPEP1/DPP4/EDN3/FCER1G/IL1B/ITGA1/ITGA9/ITGB2/LBP/LGALS3/MDK/NCKAP1L/NOD2/PF4/PPBP/RAC2/SLIT2/SYK/TGFB2/TNFAIP6/VAV1	31
518	Up	GO:0002819	regulation of adaptive immune response	49/2245	207/18888	0.236715	1.99157	5.26844	1.49883e-06	1.67013e-05	1.0112e-05	AHR/ALOX15/ANXA1/ARG1/ASCL2/C3/C4BPB/CD28/CD4/CD55/CEACAM1/CLC/CLEC7A/CR1L/GATA3/HFE/HLA-C/HLA-DRB1/HLA-E/HLA-G/HLX/HPX/IL18/IL18R1/IL1B/IL1R1/IL4R/IL6ST/MICB/MR1/NCKAP1L/NFKBIZ/NOD2/PLA2G4A/PTPN6/PTPRC/PYCARD/RIPK3/SASH3/SPN/STAT6/SVEP1/TGFB1/TNFAIP3/TNFRSF1B/TNFSF4/TREM2/ZBTB7B/ZP3	49
519	Up	GO:0008585	female gonad development	30/2245	102/18888	0.294118	2.47452	5.48412	1.55438e-06	1.72536e-05	1.04464e-05	A2M/ADAMTS1/AFP/AMHR2/CEBPB/CGA/CYP19A1/DMC1/EREG/FOXC1/FSHR/FST/FZD4/GAS2/KDR/LHX9/MMP14/MMP2/NOS3/NR2F2/NR5A1/NUPR1/PDGFRA/PGR/SLIT2/SLIT3/TNFAIP6/WT1/ZFP42/ZP3	30
520	Up	GO:0055092	sterol homeostasis	30/2245	102/18888	0.294118	2.47452	5.48412	1.55438e-06	1.72536e-05	1.04464e-05	ACSM1/ACSM3/ANGPTL3/APOA1/APOA2/APOA4/APOA5/APOB/APOC3/APOE/APOM/CAV1/CES1/DGAT2/EPHX2/HNF4A/IL18/LDLRAP1/LIPC/MALL/MALRD1/MTTP/MYLIP/NPC1L1/NR1H4/NR5A2/PCSK9/PLA2G12B/SOAT2/XBP1	30
521	Up	GO:0071542	dopaminergic neuron differentiation	17/2245	41/18888	0.414634	3.48847	5.85837	1.60802e-06	1.78147e-05	1.07862e-05	DKK1/EN2/FGF20/FGF8/FOXA1/FOXA2/LMX1A/LMX1B/PHOX2A/PHOX2B/PITX3/RSPO2/SHH/WNT1/WNT2/WNT3A/WNT5A	17
522	Up	GO:0060351	cartilage development involved in endochondral bone morphogenesis	15/2245	33/18888	0.454545	3.82426	5.96378	1.62001e-06	1.79132e-05	1.08458e-05	CER1/COL1A1/COL27A1/COL2A1/COMP/FOSL2/GHR/HOXA11/IHH/RARG/SERPINH1/SHOX2/STC1/TGFBR2/TRPV4	15
523	Up	GO:0002504	antigen processing and presentation of peptide or polysaccharide antigen via MHC class II	16/2245	37/18888	0.432432	3.63821	5.89953	1.65889e-06	1.82731e-05	1.10637e-05	CD74/CTSE/CTSF/CTSV/FCER1G/HLA-DMB/HLA-DOA/HLA-DPA1/HLA-DQB1/HLA-DQB2/HLA-DRB1/IFI30/PYCARD/THBS1/TREM2/UNC93B1	16
524	Up	GO:0010092	specification of animal organ identity	16/2245	37/18888	0.432432	3.63821	5.89953	1.65889e-06	1.82731e-05	1.10637e-05	BMP2/BMP4/DKK1/FGF10/FGF8/FOXH1/GATA5/GDNF/HOXA11/HOXC11/PAX2/PAX8/SIX1/WNT11/WNT2/WNT5A	16
525	Up	GO:0009308	amine metabolic process	33/2245	118/18888	0.279661	2.35289	5.41433	1.6695e-06	1.8355e-05	1.11133e-05	ACMSD/AGMAT/AOC1/BHMT/CHDH/CYP1A1/DBH/EDNRA/EPAS1/GATA3/GCH1/GRIN2A/HAAO/HAND2/HNMT/HTR1A/IDO1/INMT/ITGAM/ITGB2/KYNU/MAOB/NR1H4/PAH/SLC22A3/SLC6A3/SLC7A7/SULT1A1/SULT1A2/SULT1C2/TDO2/TGFB2/TRH	33
526	Up	GO:0044403	biological process involved in symbiotic interaction	66/2245	311/18888	0.212219	1.78547	5.12976	1.72672e-06	1.8912e-05	1.14506e-05	AGTR1/ANPEP/APOBEC3H/APOE/ARG1/AVP/CAV1/CAV2/CCL3/CCL5/CD4/CD55/CD74/CD86/CHMP4C/CLDN1/CLDN6/CLDN9/CSF1R/CX3CR1/CXCL6/DPP4/F11R/F2/F2RL1/FCN1/FN1/GSN/GYPA/HAVCR1/HLA-DRB1/HMGA2/HPN/HRG/ICAM1/IFI27/IFIT1/IFITM1/IFITM2/IFITM3/ITGA5/ITGB5/ITGB6/ITGB7/LEF1/LGALS1/LRRC19/LY6E/MBL2/MRC1/MUC2/NOD2/NRP1/PF4/PIK3C2G/PLG/PLSCR1/POU2F3/SIGLEC1/SLC1A5/STOM/TMPRSS2/TMPRSS4/TRIM38/TRIM6/VAMP8	66
527	Up	GO:0046879	hormone secretion	66/2245	311/18888	0.212219	1.78547	5.12976	1.72672e-06	1.8912e-05	1.14506e-05	ADCYAP1/AGT/AGTR1/ALOX5/ANO1/ANXA1/AQP1/CCL5/CFTR/CGA/CYP19A1/DAB2/EDN3/F2/F2RL1/FAM3B/FGA/FGB/FGF23/FGG/FOXA2/FOXD1/FOXO1/FZD4/GAL/GATA3/GCG/GJA1/GPER1/HFE/HLA-DRB1/HNF1A/HNF1B/HNF4A/HTR1A/IL11/IL1B/ILDR1/ITPR1/KCNQ1/LYN/MAFA/MC4R/MTNR1B/NKX3-1/NKX6-1/NR1H4/OPRK1/ORAI1/PAX8/PCK2/PDX1/POMC/PPARG/RAB11FIP1/RBP4/REN/RFX6/SLC2A2/SPINK1/TBX3/TCIRG1/TFAP2B/TRH/TRPV4/VAMP8	66
528	Up	GO:0002456	T cell mediated immunity	35/2245	129/18888	0.271318	2.2827	5.36893	1.7728e-06	1.93068e-05	1.16896e-05	AHR/ARG1/CD55/CD70/CEACAM1/CLC/CR1L/CTSC/CTSH/GATA3/HFE/HLA-C/HLA-DRB1/HLA-E/HLA-G/ICAM1/IL18/IL18R1/IL1B/IL1R1/JAG1/MICB/MR1/MYO1G/NCKAP1L/NFKBIZ/NOD2/PTPRC/RIPK3/SASH3/SPN/TNFRSF1B/TNFSF4/UNC93B1/ZP3	35
529	Up	GO:0032612	interleukin-1 production	35/2245	129/18888	0.271318	2.2827	5.36893	1.7728e-06	1.93068e-05	1.16896e-05	ACP5/ANXA1/APOA1/CARD16/CCL3/CD33/CD36/CEACAM1/CLEC7A/CX3CR1/ELF4/F2RL1/GSDMD/IFI16/IGF1/IL1R2/NLRP1/NLRP12/NLRP7/NOD1/NOD2/NR1H4/ORM1/ORM2/PYCARD/S100A13/SERPINB1/SPHK1/TLR4/TLR6/TMEM106A/TNFAIP3/TREM2/TYROBP/WNT5A	35
530	Up	GO:0032652	regulation of interleukin-1 production	35/2245	129/18888	0.271318	2.2827	5.36893	1.7728e-06	1.93068e-05	1.16896e-05	ACP5/ANXA1/APOA1/CARD16/CCL3/CD33/CD36/CEACAM1/CLEC7A/CX3CR1/ELF4/F2RL1/GSDMD/IFI16/IGF1/IL1R2/NLRP1/NLRP12/NLRP7/NOD1/NOD2/NR1H4/ORM1/ORM2/PYCARD/S100A13/SERPINB1/SPHK1/TLR4/TLR6/TMEM106A/TNFAIP3/TREM2/TYROBP/WNT5A	35
531	Up	GO:0072577	endothelial cell apoptotic process	23/2245	68/18888	0.338235	2.8457	5.59988	1.80759e-06	1.96486e-05	1.18965e-05	ANGPT1/ANGPTL4/CD248/CD40/CDH5/FGA/FGB/FGG/GATA2/GATA3/GPER1/HLA-G/ICAM1/ITGA4/KDR/NDNF/RGCC/SERPINE1/TEK/TERT/TGFB1/THBS1/TNFAIP3	23
532	Up	GO:0051090	regulation of DNA-binding transcription factor activity	77/2245	381/18888	0.2021	1.70034	5.07197	1.81633e-06	1.97065e-05	1.19316e-05	ADORA3/AGT/ANXA3/ANXA4/ARHGEF5/BMP2/C14orf39/CAPN3/CARD11/CARD16/CD36/CD40/CLEC7A/CMKLR1/CYP1B1/DDR2/ENPP1/FOXA1/FOXA2/FOXH1/FOXS1/FZD4/FZD6/HAND1/HCK/HEYL/ID1/ID2/ID3/IL18/IL18R1/IL1B/IL1RAP/KLF4/MDFI/MYOCD/NEUROG1/NHLH2/NKX6-1/NLRC5/NLRP12/NOD1/NOD2/NTRK1/NUPR1/PKHD1/PLCG2/POU4F1/POU4F2/PPARG/PTGIS/PYCARD/RGCC/RHEBL1/RIPK3/RIPK4/ROR1/SIGIRR/SP100/SPHK1/SPI1/SYK/TICAM1/TLR2/TLR4/TLR6/TNFAIP3/TNF…	77
533	Up	GO:0045137	development of primary sexual characteristics	54/2245	238/18888	0.226891	1.90891	5.18258	1.82221e-06	1.97332e-05	1.19477e-05	A2M/ACE/ADAMTS1/AFP/AMHR2/CEBPB/CGA/CYP19A1/CYP1B1/DHH/DMC1/EREG/FGF8/FOXC1/FSHR/FST/FZD4/GAS2/GATA3/GATA4/GATA6/GJA1/HOXA10/HOXA11/HOXA9/IL1A/IRX5/KDR/LHX9/MMP14/MMP2/NHLH2/NKX3-1/NOS3/NR2F2/NR5A1/NTRK1/NUPR1/OSR1/PDGFRA/PGR/REN/RXFP2/SIX4/SLIT2/SLIT3/TCF21/TGFB2/TNFAIP6/UTF1/WNT5A/WT1/ZFP42/ZP3	54
534	Up	GO:0090102	cochlea development	19/2245	50/18888	0.38	3.19708	5.7133	1.93526e-06	2.08836e-05	1.26443e-05	CALB1/CTHRC1/EYA1/FRZB/GATA2/GRHL3/GRXCR1/HEY2/HOXA1/HPN/KCNQ1/MYO7A/NEUROG1/PAX2/PTK7/SIX1/TBX18/TBX2/WNT5A	19
535	Up	GO:0006801	superoxide metabolic process	24/2245	73/18888	0.328767	2.76604	5.55243	1.93568e-06	2.08836e-05	1.26443e-05	ACP5/APOA4/CD177/CD36/CLEC7A/CYBA/CYBB/DUOX2/F2RL1/GCH1/ITGAM/ITGB2/MB/MPO/NCF2/NCF4/NOS3/NOX4/NQO1/PON3/SOD3/SYK/TGFB1/TYROBP	24
536	Up	GO:0009948	anterior/posterior axis specification	21/2245	59/18888	0.355932	2.99459	5.63559	1.97033e-06	2.11621e-05	1.28129e-05	BMP4/CDX1/CDX2/CDX4/CER1/ETS2/FOXA2/GDF3/GPC3/HEY2/HOXD8/LEFTY2/NEUROG1/PCSK6/SHH/SIX2/TBX3/WLS/WNT5A/WNT8A/WT1	21
537	Up	GO:0010718	positive regulation of epithelial to mesenchymal transition	21/2245	59/18888	0.355932	2.99459	5.63559	1.97033e-06	2.11621e-05	1.28129e-05	AGT/ALX1/BAMBI/BMP2/BMP4/COL1A1/DAB2/FOXC1/IL1B/JAG1/LEF1/LOXL2/LRG1/MDK/RGCC/SNAI1/TBX20/TGFB1/TGFB2/TGFBR2/TWIST1	21
538	Up	GO:0002281	macrophage activation involved in immune response	11/2245	19/18888	0.578947	4.87089	6.19994	1.97982e-06	2.11621e-05	1.28129e-05	CX3CR1/DYSF/GRN/LBP/NMI/PLCG2/SUCNR1/SYK/TICAM1/TREM2/TYROBP	11
539	Up	GO:0048486	parasympathetic nervous system development	11/2245	19/18888	0.578947	4.87089	6.19994	1.97982e-06	2.11621e-05	1.28129e-05	ACKR3/EGR2/GDNF/HOXB1/HOXB2/NAV2/NRP1/PHOX2A/PHOX2B/SIX1/TFAP2A	11
540	Up	GO:0051797	regulation of hair follicle development	11/2245	19/18888	0.578947	4.87089	6.19994	1.97982e-06	2.11621e-05	1.28129e-05	CDH3/FERMT1/FST/GAL/HPSE/MSX2/NGFR/TGFB2/TRADD/WNT10B/WNT5A	11
541	Up	GO:0070664	negative regulation of leukocyte proliferation	29/2245	98/18888	0.295918	2.48967	5.43017	2.01252e-06	2.14719e-05	1.30004e-05	ARG1/BMP4/CD300A/CD86/CEBPB/ENPP3/GAL/GPNMB/GREM1/HLA-DRB1/HLA-E/HLA-G/IDO1/IHH/LILRB2/LRRC32/LYN/MNDA/PLA2G2A/PLA2G5/PTPN6/SDC4/SHH/SPN/TNFAIP3/TYROBP/VSIG4/VTCN1/ZBTB7B	29
542	Up	GO:0051145	smooth muscle cell differentiation	25/2245	78/18888	0.320513	2.69659	5.51447	2.0216e-06	2.1529e-05	1.3035e-05	ADM/APLNR/BMP4/COMP/EDNRA/EDNRB/EREG/FGF10/FOXF1/GATA6/GPER1/HEY2/ITGA8/MYOCD/NFATC1/NFATC2/NPNT/PRDM6/RBPMS2/SHH/SIX1/TBX18/TBX2/TBX3/TMEM204	25
543	Up	GO:1990748	cellular detoxification	33/2245	119/18888	0.277311	2.33312	5.35791	2.04944e-06	2.17853e-05	1.31902e-05	ABCG2/ADH4/AKR1B10/ALB/ALDH1A1/ALOX5AP/APOA4/APOE/APOM/CD36/DUOX2/FABP1/GCH1/GPX2/GPX7/GPX8/GSTA1/HBA1/HBA2/HBE1/HBG1/HBG2/HBZ/HP/MB/MGST1/MGST2/MPO/NOS3/NQO1/PTGS1/SLC39A8/SOD3	33
544	Up	GO:0023061	signal release	93/2245	487/18888	0.190965	1.60666	4.98152	2.15181e-06	2.28314e-05	1.38236e-05	ADCYAP1/ADORA3/ADRA2B/AGT/AGTR1/ALOX5/ANO1/ANXA1/AQP1/CCL5/CFTR/CGA/CHRNA6/CXCL12/CYP19A1/DAB2/DYSF/EDN3/EDNRB/F2/F2RL1/FAM3B/FGA/FGB/FGF20/FGF23/FGG/FOXA2/FOXD1/FOXO1/FZD4/GAL/GATA3/GCG/GDNF/GJA1/GPER1/HFE/HLA-DRB1/HNF1A/HNF1B/HNF4A/HTR1A/IL11/IL1A/IL1B/ILDR1/ITPR1/KCNQ1/LRRK2/LYN/MAFA/MAOB/MC4R/MCTP2/MTNR1B/MYOF/NKX3-1/NKX6-1/NR1H4/OPRK1/OR51E2/ORAI1/P2RX1/PAX8/PCK2/PCSK5/PDX1/PLA2G4A/POMC/PPAR…	93
545	Up	GO:0002822	regulation of adaptive immune response based on somatic recombination of immune receptors built from immunoglobulin superfamily domains	46/2245	192/18888	0.239583	2.0157	5.19537	2.18118e-06	2.31005e-05	1.39865e-05	AHR/ANXA1/ARG1/ASCL2/C3/C4BPB/CD28/CD4/CD55/CEACAM1/CLC/CLEC7A/CR1L/GATA3/HFE/HLA-C/HLA-DRB1/HLA-E/HLA-G/HLX/HPX/IL18/IL18R1/IL1B/IL1R1/IL4R/MICB/MR1/NCKAP1L/NFKBIZ/NOD2/PLA2G4A/PTPN6/PTPRC/RIPK3/SASH3/SPN/STAT6/SVEP1/TGFB1/TNFAIP3/TNFRSF1B/TNFSF4/TREM2/ZBTB7B/ZP3	46
546	Up	GO:0009074	aromatic amino acid family catabolic process	10/2245	16/18888	0.625	5.25835	6.25844	2.23969e-06	2.36767e-05	1.43354e-05	ACMSD/FAH/HAAO/HGD/HPD/IDO1/KYNU/PAH/TAT/TDO2	10
547	Up	GO:0060441	epithelial tube branching involved in lung morphogenesis	14/2245	30/18888	0.466667	3.92624	5.8911	2.44747e-06	2.58259e-05	1.56367e-05	BMP4/CTSH/CTSZ/ESRP2/FGF10/FOXA1/FOXF1/HHIP/HOXA5/RSPO2/SHH/TBX2/WNT2/YAP1	14
548	Up	GO:0009798	axis specification	29/2245	99/18888	0.292929	2.46452	5.36581	2.52615e-06	2.66076e-05	1.61099e-05	BMP4/CDX1/CDX2/CDX4/CER1/ETS2/FGF10/FOXA2/GDF3/GPC3/HEY2/HOXD8/IRX4/LEFTY2/MDFI/NEUROG1/PCSK6/PITX2/SHH/SIX2/SMAD6/STC1/TBX3/WLS/WNT1/WNT5A/WNT6/WNT8A/WT1	29
549	Up	GO:0003281	ventricular septum development	24/2245	74/18888	0.324324	2.72866	5.47215	2.54433e-06	2.66531e-05	1.61375e-05	APLNR/BMP4/GATA3/GATA4/GJA5/HEY2/HEYL/HOXA13/NOS3/PAX8/PRDM1/PTK7/SALL4/SLIT2/SLIT3/SMAD6/STRA6/TBX3/TBX5/TGFB2/TGFBR2/TGFBR3/WNT11/WNT5A	24
550	Up	GO:0046637	regulation of alpha-beta T cell differentiation	24/2245	74/18888	0.324324	2.72866	5.47215	2.54433e-06	2.66531e-05	1.61375e-05	ANXA1/ASCL2/CD86/GATA3/HLA-DRB1/HLX/IHH/IL18/IL2RG/IL4R/NCKAP1L/NFKBIZ/PRDM1/RUNX1/RUNX3/SASH3/SHH/SOCS1/SYK/TGFBR2/TNFSF4/ZAP70/ZBTB16/ZBTB7B	24
551	Up	GO:0070527	platelet aggregation	24/2245	74/18888	0.324324	2.72866	5.47215	2.54433e-06	2.66531e-05	1.61375e-05	ADAMTS18/CD9/CEACAM1/COMP/EMILIN1/EMILIN2/F11R/FGA/FGB/FGG/FGL1/IL6ST/LYN/MYL12A/MYL9/P2RY12/PDGFRA/PEAR1/PLEK/PRKG1/PTPN6/SYK/TLN1/WNT3A	24
552	Up	GO:0003382	epithelial cell morphogenesis	15/2245	34/18888	0.441176	3.71178	5.81254	2.58072e-06	2.69854e-05	1.63387e-05	CLDN3/COL18A1/COL27A1/DACT2/FLNB/FRMD6/GRHL2/HOXA13/IHH/MET/PKHD1/POF1B/RAB25/ST14/STC1	15
553	Up	GO:0042246	tissue regeneration	25/2245	79/18888	0.316456	2.66246	5.4382	2.62628e-06	2.74121e-05	1.6597e-05	APOA5/B4GALNT2/CAPN3/CD9/COL6A1/CPQ/EPPK1/FGF10/GATA4/GJA1/IGF1/KLF5/KLK6/LGR6/MDK/MYOZ1/PLG/POSTN/RUNX1/SGCA/TEC/TM4SF4/TXK/WNT10B/YAP1	25
554	Up	GO:0046634	regulation of alpha-beta T cell activation	32/2245	115/18888	0.278261	2.34111	5.2981	2.685e-06	2.79745e-05	1.69375e-05	ANXA1/ASCL2/CARD11/CD28/CD300A/CD55/CD86/EBI3/GATA3/HFE/HLA-DRB1/HLA-E/HLX/IHH/IL18/IL2RG/IL4R/NCKAP1L/NFKBIZ/PRDM1/PTPRC/RUNX1/RUNX3/SASH3/SHH/SOCS1/SYK/TGFBR2/TNFSF4/ZAP70/ZBTB16/ZBTB7B	32
555	Up	GO:0033674	positive regulation of kinase activity	64/2245	303/18888	0.211221	1.77708	5.00818	2.90821e-06	3.02453e-05	1.83125e-05	ADCYAP1/ADRA2B/AGT/ANGPT1/ARHGEF5/CARD10/CCL5/CCND1/CD300A/CD4/CD40/CD74/CD86/CHI3L1/CSF1R/DDR2/EDN3/EPHA1/EPHB4/ERBB3/EREG/F2/FGF18/FLT1/GH1/GHR/HLA-DRB1/HMGA2/IGF1/IL1B/IL34/IL6R/KDR/LCP2/LRRK2/LTK/MET/MUSK/NOX4/NTF3/NTRK1/PDGFRA/PIK3R5/PIK3R6/PTPRC/RGCC/RIPK3/ROR1/ROR2/ROS1/SASH1/TEK/TGFB2/TGFBR2/THBS1/TIE1/TLR4/TLR6/TNFRSF10A/TNFRSF11A/TNFSF15/TPD52L1/TREM2/WNT5A	64
556	Up	GO:0055010	ventricular cardiac muscle tissue morphogenesis	18/2245	47/18888	0.382979	3.22214	5.60199	3.15092e-06	3.27107e-05	1.98051e-05	BMP10/DSP/EDNRA/FOXC1/FOXC2/FOXH1/HAND1/HEY2/MYL3/PKP2/POU4F1/TGFB1/TGFB2/TGFBR3/TNNC1/TNNI1/TNNT2/TPM1	18
557	Up	GO:0002455	humoral immune response mediated by circulating immunoglobulin	20/2245	56/18888	0.357143	3.00477	5.51804	3.23831e-06	3.35575e-05	2.03178e-05	C1QA/C1QB/C1QC/C3/C4B/C4BPB/C7/C8A/C8B/CD55/CR1L/HPX/MBL2/NOD2/PTPN6/PTPRC/SERPING1/SVEP1/TREM2/ZP3	20
558	Up	GO:0045580	regulation of T cell differentiation	44/2245	183/18888	0.240437	2.02289	5.10678	3.25183e-06	3.36372e-05	2.03661e-05	ANXA1/ASCL2/BMP4/CARD11/CD28/CD74/CD86/FGL2/GATA3/HLA-DOA/HLA-DRB1/HLA-G/HLX/IHH/IL18/IL2RG/IL4R/LEF1/LILRB2/MDK/NCKAP1L/NFKBIZ/PCK1/PIK3R6/PRDM1/PTPRC/RAG1/RHOH/RUNX1/RUNX3/SASH3/SHH/SMARCD2/SOCS1/SOX13/SYK/TCF7/TGFBR2/TNFSF4/WNT10B/XBP1/ZAP70/ZBTB16/ZBTB7B	44
559	Up	GO:0009953	dorsal/ventral pattern formation	27/2245	90/18888	0.3	2.52401	5.32264	3.3592e-06	3.46856e-05	2.10009e-05	ACVRL1/BMP1/BMP4/CER1/DBX1/FGF8/FOXA1/GLI1/GREM1/GSC/HHIP/HOXA11/HOXA2/HOXB2/HOXD11/LHX3/LMX1B/MDFI/OVOL2/SHH/SMAD6/SOSTDC1/TBX20/TLL1/WNT3A/WNT8A/WNT8B	27
560	Up	GO:0061053	somite development	26/2245	85/18888	0.305882	2.5735	5.33994	3.40134e-06	3.50581e-05	2.12264e-05	ALDH1A2/CDX1/CDX2/DKK1/DMRT2/FOXB1/FOXC1/FOXC2/FOXF1/FRZB/GDF3/IHH/LEF1/MEOX1/MEOX2/NKD1/NKX3-1/SHH/SIX1/SIX4/TBX18/TCF15/WNT1/WNT11/WNT3A/WNT5A	26
561	Up	GO:0046545	development of primary female sexual characteristics	30/2245	106/18888	0.283019	2.38114	5.23713	3.73289e-06	3.84069e-05	2.3254e-05	A2M/ADAMTS1/AFP/AMHR2/CEBPB/CGA/CYP19A1/DMC1/EREG/FOXC1/FSHR/FST/FZD4/GAS2/KDR/LHX9/MMP14/MMP2/NOS3/NR2F2/NR5A1/NUPR1/PDGFRA/PGR/SLIT2/SLIT3/TNFAIP6/WT1/ZFP42/ZP3	30
562	Up	GO:0060828	regulation of canonical Wnt signaling pathway	58/2245	268/18888	0.216418	1.8208	4.97039	3.79158e-06	3.89413e-05	2.35775e-05	APOE/BAMBI/BMP2/CAV1/CDH3/COL1A1/CTHRC1/DAAM2/DAB2/DKK1/DKK2/FERMT1/FGF10/FOLR1/FOXO1/FRZB/FZD6/GLI1/GPC3/GPC5/GREM1/HHEX/IGFBP4/IGFBP6/LGR4/LGR5/LGR6/LRRK2/MDK/NKD1/NKD2/NOTUM/PLEKHA4/PTK7/RBMS3/RSPO1/RSPO2/RSPO3/SFRP5/SHH/SHISA3/SNAI2/SOST/SOSTDC1/SOX10/SOX13/SOX17/SULF2/TBX18/TGFB1/TMEM88/TPBG/WLS/WNT10B/WNT11/WNT3A/WNT5A/YAP1	58
563	Up	GO:0060324	face development	19/2245	52/18888	0.365385	3.07411	5.50065	3.84183e-06	3.93873e-05	2.38476e-05	ALDH1A2/ALDH1A3/CLDN5/COL1A1/CRISPLD2/CSRNP1/DKK1/EDNRA/GRHL2/HOXB3/LEF1/MMP2/MSX1/PAX9/PDGFRA/RARG/RRAS/STRA6/WNT5A	19
564	Up	GO:0002577	regulation of antigen processing and presentation	11/2245	20/18888	0.55	4.62735	5.96095	3.92558e-06	4.01745e-05	2.43242e-05	CD74/FGL2/HFE/HLA-DOA/LILRB2/NOD1/NOD2/PYCARD/TAPBPL/THBS1/TREM2	11
565	Up	GO:0031100	animal organ regeneration	22/2245	66/18888	0.333333	2.80445	5.39335	3.96754e-06	4.03949e-05	2.44576e-05	ACE/ADM/ANGPT2/ANXA3/APOA2/CCND1/CEBPB/CLDN1/CXCL12/F7/GLI1/HSPG2/IHH/LCP1/NNMT/PDX1/PTPN3/SERPINA10/SULF2/TGFBR3/VTN/WNT1	22
566	Up	GO:0001945	lymph vessel development	14/2245	31/18888	0.451613	3.79958	5.72944	3.9751e-06	4.03949e-05	2.44576e-05	ACVRL1/CCBE1/CLEC14A/FOXC1/FOXC2/KDR/NR2F2/PTPN14/SOX18/SVEP1/SYK/TIE1/TMEM204/VEGFC	14
567	Up	GO:0003338	metanephros morphogenesis	14/2245	31/18888	0.451613	3.79958	5.72944	3.9751e-06	4.03949e-05	2.44576e-05	AGTR2/BMP4/CALB1/FGF10/FMN1/FRAS1/GDNF/GREM1/KIF26B/LGR4/PAX2/PAX8/SIX2/WT1	14
568	Up	GO:0021602	cranial nerve morphogenesis	14/2245	31/18888	0.451613	3.79958	5.72944	3.9751e-06	4.03949e-05	2.44576e-05	ATP8B1/EGR2/HOXA1/HOXA3/HOXB1/HOXB2/HOXB3/HOXD3/NEUROG1/NRP1/PAX2/PHOX2A/SIX1/TFAP2A	14
569	Up	GO:0002495	antigen processing and presentation of peptide antigen via MHC class II	15/2245	35/18888	0.428571	3.60573	5.66691	4.02076e-06	4.0787e-05	2.46951e-05	CD74/CTSE/CTSF/CTSV/FCER1G/HLA-DMB/HLA-DOA/HLA-DPA1/HLA-DQB1/HLA-DQB2/HLA-DRB1/IFI30/PYCARD/TREM2/UNC93B1	15
570	Up	GO:0050680	negative regulation of epithelial cell proliferation	42/2245	173/18888	0.242775	2.04255	5.0594	4.14551e-06	4.19788e-05	2.54166e-05	ACVRL1/ALOX5/APOE/APOH/B4GALT1/BMP4/CAV1/CAV2/CDKN1C/CEACAM1/DAB2/EPPK1/EREG/FLT1/GATA3/GPC3/HPN/IRF6/LIMS2/MARVELD3/NGFR/NKX3-1/NR2F2/NUPR1/OVOL1/PDX1/PHOX2B/PPARG/RGCC/RUNX3/SERPINF1/SFN/SNAI2/SPARC/SULF1/TGFB1/TGFB2/TGFBR3/THBS1/VDR/WNT10B/WNT5A	42
571	Up	GO:0033273	response to vitamin	27/2245	91/18888	0.296703	2.49627	5.25486	4.24046e-06	4.27939e-05	2.59102e-05	ALDH1A2/AQP3/CD40/COL1A1/CYP1A1/CYP26A1/EPO/F5/F7/FABP1/FES/FGF23/FOLR1/FOLR2/GATA4/IL1A/KANK2/KYNU/LRAT/NFKBIZ/OTC/PDX1/POSTN/SNAI2/STC1/STC2/VDR	27
572	Up	GO:0045667	regulation of osteoblast differentiation	39/2245	156/18888	0.25	2.10334	5.08222	4.24825e-06	4.27939e-05	2.59102e-05	AREG/BAMBI/BMP2/BMP4/CEBPA/CEBPB/CEBPD/CTHRC1/DDR2/FBN2/FGF23/GDF10/GLI1/GREM1/HAND2/HGF/HOXA2/ID3/IFITM1/IGF1/IGFBP5/IL6R/IL6ST/JAG1/MSX2/NPNT/PPARG/RUNX2/SMAD6/SNAI2/TCIRG1/TMEM119/TNFAIP6/TP63/TWIST1/TWIST2/VEGFC/WNT10B/YAP1	39
573	Up	GO:0046718	symbiont entry into host cell	39/2245	156/18888	0.25	2.10334	5.08222	4.24825e-06	4.27939e-05	2.59102e-05	AGTR1/ANPEP/AVP/CAV1/CAV2/CD4/CD55/CD74/CD86/CLDN1/CLDN6/CLDN9/DPP4/F11R/FCN1/GSN/GYPA/HAVCR1/HLA-DRB1/ICAM1/IFITM1/IFITM2/IFITM3/ITGA5/ITGB5/ITGB6/ITGB7/LGALS1/LY6E/MRC1/NRP1/PLSCR1/SIGLEC1/SLC1A5/TMPRSS2/TMPRSS4/TRIM38/TRIM6/VAMP8	39
574	Up	GO:0002720	positive regulation of cytokine production involved in immune response	25/2245	81/18888	0.308642	2.59672	5.28913	4.35745e-06	4.38174e-05	2.65299e-05	CD36/CD55/CD74/CLEC7A/F2RL1/GATA3/HLA-E/HLA-G/IL18/IL18R1/IL1B/IL1R1/LAPTM5/NOD1/NOD2/PLCG2/PYCARD/SASH3/SPON2/SYK/TICAM1/TLR4/TNFSF4/TRIM6/WNT5A	25
575	Up	GO:0060986	endocrine hormone secretion	20/2245	57/18888	0.350877	2.95206	5.42085	4.43453e-06	4.4515e-05	2.69522e-05	AGT/AGTR1/AQP1/CGA/CYP19A1/DAB2/FOXD1/FZD4/GAL/GATA3/GJA1/IL1B/KCNQ1/NKX3-1/OPRK1/POMC/PPARG/RAB11FIP1/REN/TBX3	20
576	Up	GO:0051345	positive regulation of hydrolase activity	91/2245	482/18888	0.188797	1.58842	4.8062	4.49319e-06	4.50255e-05	2.72613e-05	ADCYAP1/AGTR1/AGTR2/APOA1/APOA4/APOA5/APOH/ARAP1/ARHGAP22/ARHGAP29/ARHGAP42/ARHGAP6/ARHGEF15/ARHGEF16/ARHGEF19/ARHGEF5/ATP2A3/AVPR1A/BCAR3/BMP2/CASP10/CAV2/CCL3/CCL3L3/CCL5/CD300A/CD33/CD40/CD86/CLDN3/CLDN4/CLEC7A/CTSH/CTSV/DLC1/DOCK6/DOCK8/EDNRA/EPHA1/F2RL1/FAM162A/FLT1/GBA3/GNA15/GPER1/GRIN2A/GRN/GSN/IFI16/ITGA1/LAPTM5/LCK/LPAR1/LYN/NGFR/NKX3-1/NLRP1/NLRP12/NOD1/NTF3/NTRK1/ODAM/P2RY6/PDGFRA/PER…	91
577	Up	GO:0002702	positive regulation of production of molecular mediator of immune response	35/2245	134/18888	0.261194	2.19752	5.10931	4.54489e-06	4.54647e-05	2.75272e-05	CD244/CD28/CD36/CD55/CD74/CD86/CLEC7A/F2RL1/GATA3/HLA-E/HLA-G/HPX/IL18/IL18R1/IL1B/IL1R1/IL4R/LAPTM5/NOD1/NOD2/PLCG2/PTPRC/PYCARD/RBP4/SASH3/SPON2/STAT6/SYK/TGFB1/TICAM1/TLR4/TNFSF4/TRIM6/WNT5A/XBP1	35
578	Up	GO:0034134	toll-like receptor 2 signaling pathway	10/2245	17/18888	0.588235	4.94904	5.98263	4.85734e-06	4.85062e-05	2.93687e-05	CYBA/F2RL1/LYN/NOD2/PIK3AP1/TLR1/TLR2/TLR6/TNFAIP3/TREM2	10
579	Up	GO:0097237	cellular response to toxic substance	34/2245	129/18888	0.263566	2.21748	5.09594	4.98879e-06	4.97328e-05	3.01114e-05	ABCG2/ADH4/AKR1B10/ALB/ALDH1A1/ALOX5AP/APOA4/APOE/APOM/CD36/CYP1B1/DUOX2/FABP1/GCH1/GPX2/GPX7/GPX8/GSTA1/HBA1/HBA2/HBE1/HBG1/HBG2/HBZ/HP/MB/MGST1/MGST2/MPO/NOS3/NQO1/PTGS1/SLC39A8/SOD3	34
580	Up	GO:0042063	gliogenesis	70/2245	346/18888	0.202312	1.70213	4.84115	5.06652e-06	5.04206e-05	3.05279e-05	ACAN/ANO1/APCDD1/AREG/ASCL2/ATOH1/BMP2/C1QA/CCL3/CD9/COL3A1/COL6A1/CSF1R/CSPG4/CX3CR1/DAAM2/EGR2/ERBB3/F2/FA2H/FGF10/GPR157/GPR17/GRN/HAPLN1/HAPLN3/ID2/IL1B/IL34/IL6ST/ITGB4/LAMA2/LAMB1/LAMC3/LEF1/LEPR/LIN28A/LPAR1/LYN/MAL/MDK/MMP14/MXRA8/MYRF/NCMAP/NEUROD4/NKX6-1/NRROS/P2RY12/PAX2/PHOX2B/PITX3/PLP1/ROR1/ROR2/RRAS/SHH/SLC45A3/SOX10/SOX13/SPINT1/TAL1/TGFB1/TGFB2/TLR2/TLR4/TNFRSF1B/TREM2/VEGFC/VTN	70
581	Up	GO:0006956	complement activation	22/2245	67/18888	0.328358	2.7626	5.30815	5.24884e-06	5.1903e-05	3.14254e-05	A2M/C1QA/C1QB/C1QC/C3/C4B/C4BPB/C7/C8A/C8B/CD55/CFB/CFH/CR1L/FCN1/IL1B/MBL2/RGCC/SERPING1/SVEP1/TREM2/VSIG4	22
582	Up	GO:0061180	mammary gland epithelium development	22/2245	67/18888	0.328358	2.7626	5.30815	5.24884e-06	5.1903e-05	3.14254e-05	AREG/CCND1/CEBPB/CSF1R/FGF10/FOXB1/FOXF1/GATA3/HOXA5/ID2/IRF6/MSX1/MSX2/ORAI1/PGR/RREB1/SOSTDC1/STAT6/TBX3/VDR/WNT2/WNT5A	22
583	Up	GO:0030539	male genitalia development	12/2245	24/18888	0.5	4.20668	5.77322	5.26044e-06	5.1903e-05	3.14254e-05	BMP5/FGF10/FGF8/HOXA13/HOXD13/HSD17B3/LGR4/PDGFRA/ROR2/SHH/TBX3/WT1	12
584	Up	GO:0060571	morphogenesis of an epithelial fold	12/2245	24/18888	0.5	4.20668	5.77322	5.26044e-06	5.1903e-05	3.14254e-05	BMP4/BMP5/FGF10/GDF7/HOXD13/OVOL2/SHH/SOSTDC1/SULF1/TP63/WNT2/WNT5A	12
585	Up	GO:0060907	positive regulation of macrophage cytokine production	12/2245	24/18888	0.5	4.20668	5.77322	5.26044e-06	5.1903e-05	3.14254e-05	CD36/CD74/HLA-G/LAPTM5/NOD1/NOD2/PLCG2/PYCARD/SPON2/TICAM1/TLR4/WNT5A	12
586	Up	GO:0030177	positive regulation of Wnt signaling pathway	37/2245	146/18888	0.253425	2.13215	5.04368	5.28219e-06	5.20287e-05	3.15015e-05	BAMBI/BMP2/CDH3/COL1A1/DAAM2/DAB2/DKK1/DKK2/FGF10/GPC3/GPC5/HHEX/LBX2/LEF1/LGR4/LGR5/LGR6/LRRK2/NKD1/PLEKHA4/PTK7/RSPO1/RSPO2/RSPO3/RSPO4/SHH/SULF1/SULF2/TERT/TGFB1/TLR2/TNFAIP3/WLS/WNT10B/WNT3A/WNT5A/YAP1	37
587	Up	GO:0002067	glandular epithelial cell differentiation	23/2245	72/18888	0.319444	2.6876	5.26922	5.46569e-06	5.37444e-05	3.25403e-05	AGR2/BMP2/BMP4/BMP5/CAV1/FGF8/FOXA1/GATA2/GATA6/HOXA5/IL31RA/KLF4/LHX3/NKX6-1/NR5A2/ONECUT1/PDX1/PGR/RARG/RFX6/TP63/WNT5A/YAP1	23
588	Up	GO:1902742	apoptotic process involved in development	16/2245	40/18888	0.4	3.36535	5.50004	5.70737e-06	5.60254e-05	3.39213e-05	CRYAB/FGF4/FOXC1/FOXC2/HAND2/HNF1B/LEF1/PAX2/PAX8/SLIT2/SLIT3/TGFB2/TNFRSF1B/VDR/XKR5/XKR8	16
589	Up	GO:0051896	regulation of phosphatidylinositol 3-kinase/protein kinase B signal transduction	55/2245	253/18888	0.217391	1.82899	4.87551	5.80429e-06	5.688e-05	3.44388e-05	AGT/ANGPT1/CCL3/CCL5/CD28/CEACAM1/CHI3L1/CRYBA1/CSF1R/CX3CR1/DCN/ERBB3/F2/F2RL1/FLT1/FN1/FSHR/GATA3/GDF15/GH1/GPER1/HCLS1/HGF/HLA-G/HPSE/IGF1/IGF2/IGFBP5/IL18/KDR/LIN28A/LTK/NKX3-1/NOX4/NTRK1/P2RY12/PDGFRA/PIK3AP1/PIK3R5/PKHD1/PTPN6/RCN3/RRAS/SELP/SERPINA12/SFRP5/TEK/TGFB1/TGFB2/THBS1/TPBG/TREM2/TSPYL5/TWIST1/UNC5B	55
590	Up	GO:1903707	negative regulation of hemopoiesis	32/2245	119/18888	0.268908	2.26242	5.07376	5.9376e-06	5.80878e-05	3.51701e-05	ANXA1/ASCL2/BMP4/C1QC/CCL3/CD74/CEACAM1/CEBPA/CLDN18/FBN1/FGL2/GATA2/HLA-G/HLX/HOXA7/ID2/IHH/IL4R/LYN/MDK/RUNX1/RUNX3/SHH/SNAI2/SOCS1/TLR4/TMEM176A/TMEM176B/TNFAIP6/TNFRSF11B/TNFSF4/ZBTB7B	32
591	Up	GO:0061005	cell differentiation involved in kidney development	20/2245	58/18888	0.344828	2.90116	5.32576	6.01686e-06	5.87636e-05	3.55793e-05	ACTA2/CD34/EDNRA/EDNRB/FOXC2/GATA3/GDNF/GREM1/JAG1/LGR4/NPHS1/OSR1/PAX2/PAX8/PODXL/SHH/SIX2/TCF21/WT1/YAP1	20
592	Up	GO:0060512	prostate gland morphogenesis	13/2245	28/18888	0.464286	3.9062	5.65208	6.0426e-06	5.89154e-05	3.56711e-05	BMP4/CRIP1/FGF10/FOXA1/HOXA13/HOXD13/MMP2/NKX3-1/RARG/SHH/SULF1/TP63/WNT5A	13
593	Up	GO:2000352	negative regulation of endothelial cell apoptotic process	15/2245	36/18888	0.416667	3.50557	5.52653	6.13693e-06	5.97341e-05	3.61669e-05	ANGPT1/ANGPTL4/CDH5/FGA/FGB/FGG/GATA2/GATA3/ICAM1/KDR/NDNF/SERPINE1/TEK/TERT/TNFAIP3	15
594	Up	GO:0061028	establishment of endothelial barrier	18/2245	49/18888	0.367347	3.09062	5.38169	6.30358e-06	6.1253e-05	3.70865e-05	CDH5/CLDN1/CLDN3/CLDN5/EDNRA/EDNRB/F11R/F2RL1/HPSE/ICAM1/IL1B/MARVELD2/MYADM/PECAM1/PROC/ROBO4/SOX18/TJP3	18
595	Up	GO:0048534	hematopoietic or lymphoid organ development	28/2245	98/18888	0.285714	2.40382	5.11722	6.36575e-06	6.17531e-05	3.73893e-05	CD248/CDH17/EPHB3/FGF10/FOXI3/FOXL1/GATA3/HAND2/HOXA3/HOXB4/LTB/LTBR/NFKB2/NFKBIZ/NKX2-3/NKX3-2/ONECUT1/PITX2/PTPRC/RAG1/RIPK3/SHH/SIX1/SIX4/SLC40A1/TCF21/TGFB1/TNFRSF11A	28
596	Up	GO:0007009	plasma membrane organization	41/2245	170/18888	0.241176	2.02911	4.95026	6.39092e-06	6.18933e-05	3.74741e-05	A4GALT/AHNAK/ANO3/ANO7/ANO9/ANXA2/ATP10A/ATP8B1/BAIAP2L1/BIN2/CAV1/CAV2/CD9/CHMP4C/COL5A1/COL6A1/COLEC12/DMKN/EHD2/FA2H/FOLR1/FOLR2/GSN/LYZL4/MYOF/MYRF/PACSIN3/PLSCR1/PLSCR4/PLSCR5/PTPRC/S100A10/SERPINA5/SLC4A1/SPTA1/SYPL2/TGFB2/TIE1/TLCD1/XKR5/XKR8	41
597	Up	GO:0032623	interleukin-2 production	21/2245	63/18888	0.333333	2.80445	5.26893	6.54059e-06	6.3131e-05	3.82235e-05	ANXA1/CARD11/CD28/CD34/CD4/CD86/CLEC7A/GATA3/IL1A/IL1B/LAPTM5/NOD2/NR1H4/PLCG2/PTPRC/RUNX1/SASH3/TNFAIP3/VSIG4/VTCN1/ZFP36	21
598	Up	GO:0032663	regulation of interleukin-2 production	21/2245	63/18888	0.333333	2.80445	5.26893	6.54059e-06	6.3131e-05	3.82235e-05	ANXA1/CARD11/CD28/CD34/CD4/CD86/CLEC7A/GATA3/IL1A/IL1B/LAPTM5/NOD2/NR1H4/PLCG2/PTPRC/RUNX1/SASH3/TNFAIP3/VSIG4/VTCN1/ZFP36	21
599	Up	GO:0055088	lipid homeostasis	42/2245	176/18888	0.238636	2.00773	4.93306	6.58399e-06	6.34437e-05	3.84129e-05	ACOX2/ACSM1/ACSM2A/ACSM3/ANGPTL3/ANGPTL4/APOA1/APOA2/APOA4/APOA5/APOB/APOC3/APOE/APOM/CAV1/CEBPA/CES1/DGAT2/ENPP7/EPHX2/HNF4A/IL18/ITGB6/LDLRAP1/LIPC/MALL/MALRD1/MLXIPL/MTTP/MYLIP/NPC1L1/NR1H4/NR5A2/PCSK9/PLA2G12B/PNPLA4/PPARG/RCN3/SOAT2/TLCD1/TREM2/XBP1	42
600	Up	GO:0090092	regulation of transmembrane receptor protein serine/threonine kinase signaling pathway	65/2245	317/18888	0.205047	1.72514	4.78196	6.88388e-06	6.61062e-05	4.00249e-05	ACVRL1/BAMBI/BMP10/BMP2/BMP4/BMP5/CAV2/CDH3/CDH5/CDKN1C/CER1/DAB2/DACT2/DKK1/EMILIN1/FBN1/FBN2/FERMT1/FGF10/FOLR1/FOXD1/FST/GATA4/GATA6/GDF3/GDF6/GDF7/GPC3/GREM1/HFE/HOXA13/HTRA3/ITGA8/KCP/KDR/LRG1/MSX1/MSX2/MYOCD/NPNT/NRROS/ONECUT1/OVOL2/PCSK6/PPARG/RASL11B/RBPMS2/SKOR2/SMAD6/SOST/SOSTDC1/SULF1/TBX20/TFAP2B/TGFB1/TGFB2/TGFBR2/TGFBR3/THBS1/TMPRSS6/TNFAIP6/VASN/WFIKKN1/WNT1/WNT5A	65
601	Up	GO:0002704	negative regulation of leukocyte mediated immunity	22/2245	68/18888	0.323529	2.72197	5.22449	6.89466e-06	6.61062e-05	4.00249e-05	AHR/ARG1/BST2/C4BPB/CD300A/CD84/CEACAM1/CR1L/CX3CR1/FOXF1/HFE/HLA-E/HLA-G/NCKAP1L/NOD2/PTPN6/PTPRC/SERPINB9/SPI1/SPN/SVEP1/TGFB1	22
602	Up	GO:0045576	mast cell activation	22/2245	68/18888	0.323529	2.72197	5.22449	6.89466e-06	6.61062e-05	4.00249e-05	CD300A/CD84/ENPP3/FES/FOXF1/GATA2/HAVCR1/IL4R/LCP2/LYN/MILR1/PLSCR1/PTGDR/PTGDS/PTPN6/RAC2/RHOH/S100A13/STXBP2/SYK/TSLP/VAMP8	22
603	Up	GO:0010717	regulation of epithelial to mesenchymal transition	32/2245	120/18888	0.266667	2.24356	5.01907	7.18477e-06	6.87736e-05	4.16399e-05	AGT/ALX1/BAMBI/BMP2/BMP4/BMP5/COL1A1/DAB2/FOXA1/FOXA2/FOXC1/GATA3/GREM1/HPN/IL1B/JAG1/LEF1/LOXL2/LRG1/MDK/OVOL2/PHLDB2/RGCC/SNAI1/TBX20/TBX5/TGFB1/TGFB2/TGFBR2/TWIST1/VASN/ZNF750	32
604	Up	GO:0042474	middle ear morphogenesis	11/2245	21/18888	0.52381	4.407	5.73726	7.35632e-06	7.00671e-05	4.24231e-05	EDNRA/EYA1/GSC/HOXA2/MSX1/NKX3-2/OSR1/OSR2/PRRX1/SIX1/SIX2	11
605	Up	GO:0071605	monocyte chemotactic protein-1 production	11/2245	21/18888	0.52381	4.407	5.73726	7.35632e-06	7.00671e-05	4.24231e-05	CD84/CLEC7A/IL1B/MCOLN2/NOD2/NR1H4/OAS1/OAS3/SYK/TRPV4/TWIST1	11
606	Up	GO:0071637	regulation of monocyte chemotactic protein-1 production	11/2245	21/18888	0.52381	4.407	5.73726	7.35632e-06	7.00671e-05	4.24231e-05	CD84/CLEC7A/IL1B/MCOLN2/NOD2/NR1H4/OAS1/OAS3/SYK/TRPV4/TWIST1	11
607	Up	GO:0010634	positive regulation of epithelial cell migration	42/2245	177/18888	0.237288	1.99639	4.8915	7.6546e-06	7.27881e-05	4.40705e-05	AGT/ANGPT1/ANGPT4/ANXA1/ANXA3/CCBE1/CD40/CTSH/ENPP2/ETS1/FGF10/FGF18/FGFBP1/FOXC2/GATA2/GATA3/GRN/HAS2/HMOX1/KDR/MET/NOS3/NRP1/PLCG2/PLG/RAB25/RRAS/RREB1/SASH1/SMOC2/SPARC/SRPX2/STAT5A/TEK/TGFB1/TGFB2/TGFBR2/TGFBR3/THBS1/VEGFC/VIL1/WNT5A	42
608	Up	GO:0043491	phosphatidylinositol 3-kinase/protein kinase B signal transduction	62/2245	299/18888	0.207358	1.74458	4.76641	7.67715e-06	7.28824e-05	4.41277e-05	AGT/ANGPT1/CCL3/CCL5/CD28/CD40/CEACAM1/CHI3L1/COL6A1/COL6A2/COL6A3/CRYBA1/CSF1R/CX3CR1/DCN/ERBB3/F2/F2RL1/FLT1/FN1/FSHR/GATA3/GDF15/GH1/GPER1/HCLS1/HGF/HLA-G/HPSE/IGF1/IGF2/IGFBP5/IL18/KDR/LIN28A/LTK/NKX3-1/NOX4/NTRK1/P2RY12/PAX2/PDGFRA/PEAR1/PIK3AP1/PIK3R5/PKHD1/PTPN6/RCN3/RRAS/SELP/SERPINA12/SFRP5/TEK/TGFB1/TGFB2/THBS1/TMEM100/TPBG/TREM2/TSPYL5/TWIST1/UNC5B	62
609	Up	GO:0015908	fatty acid transport	31/2245	115/18888	0.269565	2.26795	5.00908	7.81423e-06	7.4062e-05	4.48418e-05	ACE/ACSL5/APOE/BDKRB2/CD36/CRABP1/CRABP2/FABP1/IL1A/IL1B/NMUR2/PLA2G12B/PLA2G2A/PLA2G4A/PLA2G4F/PLA2G5/PPARG/RBP2/RBP5/SLC22A6/SLC22A7/SLC22A9/SLC27A2/SLC27A6/SLC2A1/SLCO1B1/SLCO2A1/SLCO2B1/SYK/THBS1/TNFRSF11A	31
610	Up	GO:0098869	cellular oxidant detoxification	28/2245	99/18888	0.282828	2.37954	5.05444	7.87996e-06	7.45625e-05	4.51449e-05	ALB/ALOX5AP/APOA4/APOE/APOM/CD36/DUOX2/FABP1/GCH1/GPX2/GPX7/GPX8/GSTA1/HBA1/HBA2/HBE1/HBG1/HBG2/HBZ/HP/MB/MGST1/MGST2/MPO/NOS3/NQO1/PTGS1/SOD3	28
611	Up	GO:0072330	monocarboxylic acid biosynthetic process	50/2245	225/18888	0.222222	1.86964	4.81961	8.0053e-06	7.56245e-05	4.57879e-05	ACMSD/ACOX2/ACSM1/ACSM2A/ACSM2B/ACSM3/AKR1D1/ALDH1A2/ALDH1A3/ALOX15/ALOX15B/ALOX5/APOA4/APOA5/APOC1/APOC3/AVP/AVPR1A/CD74/CEACAM1/CES1/CYP1A1/CYP27A1/CYP2C9/CYP8B1/DSE/ELOVL7/FA2H/FADS6/HOGA1/HPGDS/IDO1/IL1B/LIPC/MALRD1/MLXIPL/NR1H4/PKLR/PLA2G4A/PLA2G4F/PLP1/PTGDS/PTGIS/PTGS1/SLC27A2/SLC45A3/TECRL/THNSL2/UST/XBP1	50
612	Up	GO:1903900	regulation of viral life cycle	36/2245	143/18888	0.251748	2.11805	4.92902	8.26765e-06	7.79753e-05	4.72112e-05	APOBEC3B/APOBEC3C/APOBEC3D/APOBEC3F/APOBEC3G/APOBEC3H/BST2/CCL5/CD28/CD4/CD74/FCN1/GSN/HLA-DRB1/HMGA2/IFI16/IFIT1/IFITM1/IFITM2/IFITM3/ISG15/ISG20/LGALS1/LY6E/MX1/NR5A2/OAS1/OAS2/OAS3/OASL/PLSCR1/SLPI/TMPRSS2/TMPRSS4/TRIM38/TRIM6	36
613	Up	GO:0031341	regulation of cell killing	30/2245	110/18888	0.272727	2.29455	5.0011	8.4548e-06	7.93514e-05	4.80444e-05	ARG1/CD55/CEACAM1/CFH/CLEC7A/CR1L/CX3CR1/CXCL6/DNASE1L3/F2RL1/HFE/HLA-C/HLA-DRB1/HLA-E/HLA-G/ICAM1/ITGAM/KLRC2/MICB/MR1/NCKAP1L/PIK3R6/PTPRC/RIPK3/SERPINB9/SPI1/SYK/TGFB1/TYROBP/VAV1	30
614	Up	GO:0032611	interleukin-1 beta production	30/2245	110/18888	0.272727	2.29455	5.0011	8.4548e-06	7.93514e-05	4.80444e-05	ACP5/APOA1/CARD16/CCL3/CD33/CD36/CLEC7A/CX3CR1/ELF4/F2RL1/GSDMD/IFI16/IGF1/NLRP1/NLRP12/NLRP7/NOD1/NOD2/ORM1/ORM2/PYCARD/SERPINB1/SPHK1/TLR4/TLR6/TMEM106A/TNFAIP3/TREM2/TYROBP/WNT5A	30
615	Up	GO:0032651	regulation of interleukin-1 beta production	30/2245	110/18888	0.272727	2.29455	5.0011	8.4548e-06	7.93514e-05	4.80444e-05	ACP5/APOA1/CARD16/CCL3/CD33/CD36/CLEC7A/CX3CR1/ELF4/F2RL1/GSDMD/IFI16/IGF1/NLRP1/NLRP12/NLRP7/NOD1/NOD2/ORM1/ORM2/PYCARD/SERPINB1/SPHK1/TLR4/TLR6/TMEM106A/TNFAIP3/TREM2/TYROBP/WNT5A	30
[truncated: 1,875 more rows]

## Sheet: Top200_DownGenes
Down
NEUROD6
FOXG1
CPNE6
CPNE6.1
DPP6
TBR1
GPR88
ARX
SLC9A4
GSX2
GABRG1
GAD2
SLC32A1
GPR26
GRM5
NEUROD2
RBFOX1
NPIPB15
SPRR3
EMX1
NKX2-1
SERF1A
SERF1A.1
IL33
GPR12
MYH14
RHOXF1
SIX3
TCEAL6
TCEAL6.1
DLX6
SLC4A10
GAD1
SEZ6
GPR149
KCNJ10
PTH2R
KRT1
MT3
KCNC3
CALB2
[truncated: 159 more rows]

## Sheet: Top200_UpGenes
Up
[truncated: 200 more rows]

[truncated: 1 more sheets: GO_Enrichment_Top200_UpDown]
