# Supplementary material for: CCB79 is a primate-specific cilium initiation factor essential to maintain neural progenitor diversity in developing brain tissue
Source: Research Square preprint supplement (doi:10.21203/rs.3.rs-7309668/v1), 2025-10-07
Supplement: Supplementary file 3 [file e51dfc17fede365e77a2fe50.xlsx]

## Sheet: Selected
Label	log2FC	SE	Tvalue	DF	pvalue	adj.pvalue	issue	log10p	log10adjp	abslog2FC	PG.Genes	PG.ProteinDescriptions	contaminant	Absolute.AVG.Log2.Ratio	description	short.name	sub.cell	GO	GO.ID	gene.name	mass	ID
CTR_vs_KIA0408	0.299724	0.12162	2.46443	3	0.090511	0.188894		1.0433	0.723782	0.299724	AKNA	Microtubule organization protein AKNA	FALSE	0.299724	AT-hook-containing transcription factor	AKNA_HUMAN	SUBCELLULAR LOCATION: Nucleus {ECO:0000269|PubMed:11268217}.	centrosome [GO:0005813]; cytosol [GO:0005829]; fibrillar center [GO:0001650]; intracellular membrane-bounded organelle [GO:0043231]; membrane [GO:0016020]; nucleoplasm [GO:0005654]; RNA polymerase II proximal promoter sequence-specific DNA binding [GO:0000978]; RNA polymerase II transcription factor activity, sequence-specific DNA binding [GO:0000981]; transcriptional activator activity, RNA poly…	GO:0000978; GO:0000981; GO:0001077; GO:0001650; GO:0005654; GO:0005813; GO:0005829; GO:0016020; GO:0043231; GO:0045944	AKNA	155,139	3155
CTR_vs_KIA0408	-1.624	0.206493	-7.86468	3	0.00428264	0.0376752		2.36829	1.42394	1.624	ARID1A	AT-rich interactive domain-containing protein 1A	FALSE	1.624	AT-rich interactive domain-containing protein 1A (ARID domain-containing protein 1A) (B120) (BRG1-associated factor 250) (BAF250) (BRG1-associated factor 250a) (BAF250A) (Osa homolog 1) (hOSA1) (SWI-like protein) (SWI/SNF complex protein p270) (SWI/SNF-related, matrix-associated, actin-dependent regulator of chromatin subfamily F member 1) (hELD)	ARI1A_HUMAN	SUBCELLULAR LOCATION: Nucleus {ECO:0000255|PROSITE-ProRule:PRU00355, ECO:0000269|PubMed:11318604, ECO:0000269|PubMed:26614907}.	nBAF complex [GO:0071565]; npBAF complex [GO:0071564]; nuclear chromatin [GO:0000790]; nucleoplasm [GO:0005654]; nucleus [GO:0005634]; SWI/SNF complex [GO:0016514]; DNA binding [GO:0003677]; ligand-dependent nuclear receptor binding [GO:0016922]; nucleosome binding [GO:0031491]; RNA polymerase II transcription factor activity, sequence-specific DNA binding [GO:0000981]; transcription coactivator …	GO:0000122; GO:0000790; GO:0000981; GO:0001704; GO:0001843; GO:0003205; GO:0003408; GO:0003677; GO:0003713; GO:0005634; GO:0005654; GO:0006337; GO:0006338; GO:0006344; GO:0006351; GO:0006357; GO:0007566; GO:0016514; GO:0016922; GO:0019827; GO:0030520; GO:0030521; GO:0030900; GO:0031491; GO:0042766; GO:0042921; GO:0043044; GO:0045893; GO:0048096; GO:0055007; GO:0060674; GO:0071277; GO:0071564; GO:…	ARID1A	242,045	127
CTR_vs_KIA0408	-1.21843	0.251686	-4.84106	3	0.0168135	0.0706227		1.77434	1.15106	1.21843	ARID1B	AT-rich interactive domain-containing protein 1B	FALSE	1.21843	AT-rich interactive domain-containing protein 1B (ARID domain-containing protein 1B) (BRG1-associated factor 250b) (BAF250B) (BRG1-binding protein hELD/OSA1) (Osa homolog 2) (hOsa2) (p250R)	ARI1B_HUMAN	SUBCELLULAR LOCATION: Nucleus {ECO:0000255|PROSITE-ProRule:PRU00355, ECO:0000269|PubMed:11988099}.	cytosol [GO:0005829]; nBAF complex [GO:0071565]; nucleoplasm [GO:0005654]; plasma membrane [GO:0005886]; SWI/SNF complex [GO:0016514]; DNA binding [GO:0003677]; RNA polymerase II transcription factor activity, sequence-specific DNA binding [GO:0000981]; transcription coactivator activity [GO:0003713]; cellular response to angiotensin [GO:1904385]; chromatin-mediated maintenance of transcription […	GO:0000981; GO:0002931; GO:0003677; GO:0003713; GO:0005654; GO:0005829; GO:0005886; GO:0006351; GO:0007270; GO:0016514; GO:0048096; GO:0060996; GO:0071565; GO:0097026; GO:1904385	ARID1B	236,123	3554
CTR_vs_KIA0408	-0.602386	0.172473	-3.49264	3	0.0396912	0.115133		1.40131	0.938799	0.602386	ARID2	AT-rich interactive domain-containing protein 2	FALSE	0.602386	AT-rich interactive domain-containing protein 2 (ARID domain-containing protein 2) (BRG1-associated factor 200) (BAF200) (Zinc finger protein with activation potential) (Zipzap/p200)	ARID2_HUMAN	SUBCELLULAR LOCATION: Nucleus.	nucleoplasm [GO:0005654]; plasma membrane [GO:0005886]; DNA binding [GO:0003677]; metal ion binding [GO:0046872]; RNA polymerase II transcription factor activity, sequence-specific DNA binding [GO:0000981]; cardiac muscle cell proliferation [GO:0060038]; coronary artery morphogenesis [GO:0060982]; embryonic organ development [GO:0048568]; heart morphogenesis [GO:0003007]; homeostatic process [GO:…	GO:0000981; GO:0003007; GO:0003677; GO:0005654; GO:0005886; GO:0006337; GO:0006351; GO:0008285; GO:0030336; GO:0042592; GO:0046872; GO:0048568; GO:0060038; GO:0060982	ARID2	197,391	2878
CTR_vs_KIA0408	-1.67035	0.587216	-2.84452	3	0.065403	0.154184		1.1844	0.811961	1.67035	ARID4B	AT-rich interactive domain-containing protein 4B	FALSE	1.67035	AT-rich interactive domain-containing protein 4B (ARID domain-containing protein 4B) (180 kDa Sin3-associated polypeptide) (Sin3-associated polypeptide p180) (Breast cancer-associated antigen BRCAA1) (Histone deacetylase complex subunit SAP180) (Retinoblastoma-binding protein 1-like 1)	ARI4B_HUMAN	SUBCELLULAR LOCATION: Nucleus {ECO:0000255|PROSITE-ProRule:PRU00355}. Cytoplasm {ECO:0000269|PubMed:11481388, ECO:0000269|PubMed:15247124}. Note=Cytoplasmic in breast cancer cells.	cytoplasm [GO:0005737]; nucleoplasm [GO:0005654]; nucleus [GO:0005634]; histone deacetylase activity [GO:0004407]; RNA polymerase II transcription factor activity, sequence-specific DNA binding [GO:0000981]; transcription regulatory region DNA binding [GO:0044212]; establishment of Sertoli cell barrier [GO:0097368]; histone H3-K9 trimethylation [GO:0036124]; histone H4-K20 trimethylation [GO:0034…	GO:0000981; GO:0004407; GO:0005634; GO:0005654; GO:0005737; GO:0006349; GO:0006351; GO:0006357; GO:0007283; GO:0034773; GO:0036124; GO:0044212; GO:0045944; GO:0097368	ARID4B	147,809	2677
CTR_vs_KIA0408	-0.348434	0.297995	-1.16926	3	0.326751	0.450281		0.485783	0.346517	0.348434	AURKA	Aurora kinase A	FALSE	0.348434	Aurora kinase A (EC 2.7.11.1) (Aurora 2) (Aurora/IPL1-related kinase 1) (ARK-1) (Aurora-related kinase 1) (hARK1) (Breast tumor-amplified kinase) (Serine/threonine-protein kinase 15) (Serine/threonine-protein kinase 6) (Serine/threonine-protein kinase aurora-A)	AURKA_HUMAN	SUBCELLULAR LOCATION: Cytoplasm, cytoskeleton, microtubule organizing center, centrosome {ECO:0000269|PubMed:12576638, ECO:0000269|PubMed:13678582, ECO:0000269|PubMed:17229885, ECO:0000269|PubMed:17726514, ECO:0000269|PubMed:19357306, ECO:0000269|PubMed:21225229, ECO:0000269|PubMed:22014574, ECO:0000269|PubMed:25657325, ECO:0000269|PubMed:9153231}. Cytoplasm, cytoskeleton, spindle pole {ECO:00002…	axon hillock [GO:0043203]; centriole [GO:0005814]; centrosome [GO:0005813]; chromosome passenger complex [GO:0032133]; cilium [GO:0005929]; condensed nuclear chromosome, centromeric region [GO:0000780]; cytosol [GO:0005829]; germinal vesicle [GO:0042585]; meiotic spindle [GO:0072687]; microtubule [GO:0005874]; microtubule cytoskeleton [GO:0015630]; midbody [GO:0030496]; mitotic spindle pole [GO:0…	GO:0000086; GO:0000278; GO:0000780; GO:0004672; GO:0004674; GO:0004712; GO:0005524; GO:0005634; GO:0005654; GO:0005813; GO:0005814; GO:0005819; GO:0005829; GO:0005874; GO:0005929; GO:0006468; GO:0006977; GO:0007051; GO:0007052; GO:0007057; GO:0007100; GO:0009611; GO:0009948; GO:0010389; GO:0010972; GO:0015630; GO:0019901; GO:0030496; GO:0031145; GO:0031616; GO:0031625; GO:0031647; GO:0032091; GO:…	AURKA	45,809	183
CTR_vs_KIA0408	0.305027	0.383427	0.795529	3	0.484436	0.599401		0.314764	0.222282	0.305027	BBS2	Bardet-Biedl syndrome 2 protein	FALSE	0.305027	Bardet-Biedl syndrome 2 protein	BBS2_HUMAN	SUBCELLULAR LOCATION: Cell projection, cilium membrane. Cytoplasm. Cytoplasm, cytoskeleton, microtubule organizing center, centrosome, centriolar satellite.	BBSome [GO:0034464]; ciliary basal body [GO:0036064]; ciliary membrane [GO:0060170]; cytosol [GO:0005829]; membrane [GO:0016020]; microvillus [GO:0005902]; motile cilium [GO:0031514]; stereocilium [GO:0032420]; RNA polymerase II repressing transcription factor binding [GO:0001103]; adult behavior [GO:0030534]; artery smooth muscle contraction [GO:0014824]; brain morphogenesis [GO:0048854]; cartil…	GO:0001103; GO:0005829; GO:0005902; GO:0007288; GO:0007601; GO:0008104; GO:0010629; GO:0014824; GO:0016020; GO:0021756; GO:0021766; GO:0021987; GO:0030534; GO:0031514; GO:0032402; GO:0032420; GO:0033365; GO:0034464; GO:0036064; GO:0038108; GO:0040015; GO:0040018; GO:0042311; GO:0043001; GO:0045444; GO:0045494; GO:0048854; GO:0051216; GO:0060170; GO:0060271; GO:0060296; GO:1903441; GO:1905515	BBS2	79,871	4389
CTR_vs_KIA0408	-0.0402538	0.200004	-0.201265	3	0.853365	0.897793		0.0688653	0.0468239	0.0402538	BBS7	Bardet-Biedl syndrome 7 protein	FALSE	0.0402538	Bardet-Biedl syndrome 7 protein (BBS2-like protein 1)	BBS7_HUMAN	SUBCELLULAR LOCATION: Cell projection, cilium membrane {ECO:0000269|PubMed:17574030, ECO:0000269|PubMed:22072986}. Cytoplasm {ECO:0000269|PubMed:22072986}. Cytoplasm, cytoskeleton, microtubule organizing center, centrosome, centriolar satellite {ECO:0000269|PubMed:22072986}. Cytoplasm, cytoskeleton, cilium basal body {ECO:0000250|UniProtKB:Q8K2G4}.	axoneme [GO:0005930]; BBSome [GO:0034464]; centrosome [GO:0005813]; ciliary basal body [GO:0036064]; ciliary membrane [GO:0060170]; cytosol [GO:0005829]; membrane [GO:0016020]; nucleus [GO:0005634]; photoreceptor outer segment [GO:0001750]; RNA polymerase II repressing transcription factor binding [GO:0001103]; brain development [GO:0007420]; cilium assembly [GO:0060271]; determination of left/ri…	GO:0001103; GO:0001654; GO:0001750; GO:0001947; GO:0005634; GO:0005813; GO:0005829; GO:0005930; GO:0006357; GO:0007224; GO:0007368; GO:0007420; GO:0007601; GO:0008104; GO:0015031; GO:0016020; GO:0032402; GO:0032436; GO:0034464; GO:0036064; GO:0045444; GO:0046907; GO:0048546; GO:0051877; GO:0060170; GO:0060173; GO:0060271; GO:1903929; GO:1905515	BBS7	80,353	3323
CTR_vs_KIA0408	1.84672	0.378833	4.87477	3	0.0164983	0.0698452		1.78256	1.15586	1.84672	C2CD3	C2 domain-containing protein 3	FALSE	1.84672	C2 domain-containing protein 3	C2CD3_HUMAN	SUBCELLULAR LOCATION: Cytoplasm, cytoskeleton, cilium basal body {ECO:0000250}. Cytoplasm, cytoskeleton, microtubule organizing center, centrosome, centriole {ECO:0000269|PubMed:23769972, ECO:0000269|PubMed:24997988}. Note=Localizes to centrioles and procentrioles both in interphase and mitosis. Localizes to centriolar satellites, localization is dependent on PCM1 and dynein-mediated retrograde t…	centriolar satellite [GO:0034451]; centriole [GO:0005814]; centrosome [GO:0005813]; ciliary basal body [GO:0036064]; cytosol [GO:0005829]; brain development [GO:0007420]; centriole elongation [GO:0061511]; ciliary basal body-plasma membrane docking [GO:0097711]; embryonic digit morphogenesis [GO:0042733]; heart looping [GO:0001947]; in utero embryonic development [GO:0001701]; neural plate axis s…	GO:0001701; GO:0001947; GO:0005813; GO:0005814; GO:0005829; GO:0007420; GO:0008589; GO:0016485; GO:0021915; GO:0021997; GO:0030162; GO:0034451; GO:0036064; GO:0042733; GO:0061511; GO:0071539; GO:0097711; GO:1905515	C2CD3	260,389	2666
CTR_vs_KIA0408	1.35761	0.302367	4.48992	3	0.0206142	0.0791652		1.68583	1.10147	1.35761	CCDC61	Centrosomal protein CCDC61	FALSE	1.35761	Coiled-coil domain-containing protein 61	CCD61_HUMAN		centrosome [GO:0005813]	GO:0005813	CCDC61	57,368	5632
CTR_vs_KIA0408	0.185124	0.0812801	2.2776	3	0.107171	0.211604		0.969921	0.674477	0.185124	CCP110	Centriolar coiled-coil protein of 110 kDa	FALSE	0.185124	Centriolar coiled-coil protein of 110 kDa (Centrosomal protein of 110 kDa) (CP110) (Cep110)	CP110_HUMAN	SUBCELLULAR LOCATION: Cytoplasm, cytoskeleton, microtubule organizing center, centrosome, centriole {ECO:0000269|PubMed:12361598, ECO:0000269|PubMed:14654843, ECO:0000269|PubMed:16760425, ECO:0000269|PubMed:17681131, ECO:0000269|PubMed:17719545, ECO:0000269|PubMed:20596027, ECO:0000269|PubMed:21620453}. Cytoplasm, cytoskeleton, microtubule organizing center, centrosome {ECO:0000250|UniProtKB:Q7TS…	centriole [GO:0005814]; centrosome [GO:0005813]; cilium [GO:0005929]; cytosol [GO:0005829]; protein-containing complex [GO:0032991]; centriole replication [GO:0007099]; centrosome duplication [GO:0051298]; ciliary basal body organization [GO:0032053]; ciliary basal body-plasma membrane docking [GO:0097711]; G2/M transition of mitotic cell cycle [GO:0000086]; negative regulation of cilium assembly…	GO:0000086; GO:0005813; GO:0005814; GO:0005829; GO:0005929; GO:0007099; GO:0010389; GO:0016579; GO:0032053; GO:0032465; GO:0032991; GO:0045724; GO:0051298; GO:0097711; GO:1902018	CCP110	113,424	291
CTR_vs_KIA0408	2.4179	0.16385	14.7568	3	0.000675088	0.0171314		3.17064	1.76621	2.4179	CDK5RAP2	CDK5 regulatory subunit-associated protein 2	FALSE	2.4179	CDK5 regulatory subunit-associated protein 2 (CDK5 activator-binding protein C48) (Centrosome-associated protein 215)	CK5P2_HUMAN	SUBCELLULAR LOCATION: Cytoplasm, cytoskeleton, microtubule organizing center, centrosome {ECO:0000269|PubMed:19553473, ECO:0000269|PubMed:25503564, ECO:0000269|PubMed:25657325, ECO:0000269|PubMed:26482847, ECO:0000269|PubMed:26485573, ECO:0000269|PubMed:29162697}. Golgi apparatus {ECO:0000269|PubMed:20466722}. Cytoplasm {ECO:0000269|PubMed:19553473}. Cytoplasm, cytoskeleton {ECO:0000269|PubMed:19…	cell junction [GO:0030054]; centrosome [GO:0005813]; cytoplasm [GO:0005737]; cytoskeleton [GO:0005856]; cytosol [GO:0005829]; extracellular exosome [GO:0070062]; Golgi apparatus [GO:0005794]; microtubule [GO:0005874]; microtubule plus-end [GO:0035371]; mitotic spindle pole [GO:0097431]; pericentriolar material [GO:0000242]; perinuclear region of cytoplasm [GO:0048471]; spindle pole [GO:0000922]; …	GO:0000086; GO:0000132; GO:0000226; GO:0000242; GO:0000922; GO:0001578; GO:0005516; GO:0005737; GO:0005794; GO:0005813; GO:0005829; GO:0005856; GO:0005874; GO:0007059; GO:0007098; GO:0007099; GO:0007420; GO:0008017; GO:0010389; GO:0015631; GO:0019901; GO:0022008; GO:0030054; GO:0031023; GO:0031116; GO:0035371; GO:0043015; GO:0044212; GO:0045664; GO:0045665; GO:0045893; GO:0046600; GO:0048471; GO:…	CDK5RAP2	215,038	4145
CTR_vs_KIA0408	0.464513	0.286057	1.62385	3	0.20287	0.32227		0.692783	0.491781	0.464513	CEP120	Centrosomal protein of 120 kDa	FALSE	0.464513	Centrosomal protein of 120 kDa (Cep120) (Coiled-coil domain-containing protein 100)	CE120_HUMAN	SUBCELLULAR LOCATION: Cytoplasm, cytoskeleton, microtubule organizing center, centrosome {ECO:0000250}. Note=Regulates the localization of TACC3 to the centrosome in neural progenitors in vivo. {ECO:0000250}.	centriole [GO:0005814]; centrosome [GO:0005813]; protein C-terminus binding [GO:0008022]; astral microtubule organization [GO:0030953]; centrosome cycle [GO:0007098]; cerebral cortex development [GO:0021987]; interkinetic nuclear migration [GO:0022027]; neurogenesis [GO:0022008]; positive regulation of centrosome duplication [GO:0010825]; positive regulation of cilium assembly [GO:0045724]; regul…	GO:0005813; GO:0005814; GO:0007098; GO:0008022; GO:0010825; GO:0021987; GO:0022008; GO:0022027; GO:0030953; GO:0032880; GO:0045724	CEP120	112,640	3474
CTR_vs_KIA0408	1.88418	0.124607	15.121	3	0.000627962	0.0166959		3.20207	1.77739	1.88418	CEP128	Centrosomal protein of 128 kDa	FALSE	1.88418	Centrosomal protein of 128 kDa (Cep128)	CE128_HUMAN	SUBCELLULAR LOCATION: Cytoplasm, cytoskeleton, microtubule organizing center, centrosome, centriole {ECO:0000269|PubMed:21399614}. Cytoplasm, cytoskeleton, spindle pole {ECO:0000269|PubMed:21399614}. Note=Associates with the mother centriole.	centriolar subdistal appendage [GO:0120103]; centriole [GO:0005814]; spindle pole [GO:0000922]; protein localization [GO:0008104]	GO:0000922; GO:0005814; GO:0008104; GO:0120103	CEP128	128,015	3048
CTR_vs_KIA0408	2.1398	0.183432	11.6654	3	0.00135332	0.0220108		2.8686	1.65736	2.1398	CEP131	Centrosomal protein of 131 kDa	FALSE	2.1398	Centrosomal protein of 131 kDa (5-azacytidine-induced protein 1) (Pre-acrosome localization protein 1)	CP131_HUMAN	SUBCELLULAR LOCATION: Cytoplasm, cytoskeleton, microtubule organizing center, centrosome {ECO:0000269|PubMed:14654843}. Cytoplasm, cytoskeleton, microtubule organizing center, centrosome, centriolar satellite {ECO:0000269|PubMed:26297806, ECO:0000269|PubMed:26616734}. Cytoplasm, cytoskeleton, cilium basal body. Cytoplasmic vesicle, secretory vesicle, acrosome {ECO:0000250|UniProtKB:Q62036}. Note=…	acrosomal vesicle [GO:0001669]; centriolar satellite [GO:0034451]; centrosome [GO:0005813]; ciliary transition zone [GO:0035869]; cytosol [GO:0005829]; intercellular bridge [GO:0045171]; intracellular membrane-bounded organelle [GO:0043231]; microtubule cytoskeleton [GO:0015630]; microtubule organizing center [GO:0005815]; protein homodimerization activity [GO:0042803]; protein-containing complex…	GO:0000086; GO:0001669; GO:0005813; GO:0005815; GO:0005829; GO:0007275; GO:0007283; GO:0008284; GO:0010389; GO:0010824; GO:0015630; GO:0030154; GO:0034451; GO:0035735; GO:0035869; GO:0042803; GO:0043231; GO:0044877; GO:0045171; GO:0071539; GO:0090316; GO:0097711	CEP131	122,149	5347
CTR_vs_KIA0408	1.70422	0.202281	8.42501	3	0.00350881	0.0339386		2.45484	1.46931	1.70422	CEP135	Centrosomal protein of 135 kDa	FALSE	1.70422	Centrosomal protein of 135 kDa (Cep135) (Centrosomal protein 4)	CP135_HUMAN	SUBCELLULAR LOCATION: Cytoplasm, cytoskeleton, microtubule organizing center, centrosome, centriole {ECO:0000269|PubMed:14654843, ECO:0000269|PubMed:17681131}. Note=During centriole biogenesis, it is concentrated within the proximal lumen of both parental centrioles and procentrioles.	centriole [GO:0005814]; centrosome [GO:0005813]; cytosol [GO:0005829]; protein C-terminus binding [GO:0008022]; centriole replication [GO:0007099]; centriole-centriole cohesion [GO:0010457]; ciliary basal body-plasma membrane docking [GO:0097711]; G2/M transition of mitotic cell cycle [GO:0000086]; positive regulation of non-motile cilium assembly [GO:1902857]; regulation of G2/M transition of mi…	GO:0000086; GO:0005813; GO:0005814; GO:0005829; GO:0007099; GO:0008022; GO:0010389; GO:0010457; GO:0097711; GO:1902857	CEP135	133,490	2872
CTR_vs_KIA0408	1.69858	0.262177	6.47876	3	0.00746357	0.046608		2.12705	1.33154	1.69858	CEP152	Centrosomal protein of 152 kDa	FALSE	1.69858	Centrosomal protein of 152 kDa (Cep152)	CE152_HUMAN	SUBCELLULAR LOCATION: Cytoplasm, cytoskeleton, microtubule organizing center, centrosome {ECO:0000269|PubMed:20598275, ECO:0000269|PubMed:21059844, ECO:0000269|PubMed:21131973, ECO:0000269|PubMed:21983783, ECO:0000269|PubMed:26297806}. Cytoplasm, cytoskeleton, microtubule organizing center, centrosome, centriole {ECO:0000269|PubMed:21983783, ECO:0000269|PubMed:22020124, ECO:0000269|PubMed:2629780…	centriole [GO:0005814]; centrosome [GO:0005813]; cytosol [GO:0005829]; deuterosome [GO:0098536]; nucleoplasm [GO:0005654]; pericentriolar material [GO:0000242]; protein kinase binding [GO:0019901]; centriole replication [GO:0007099]; centrosome duplication [GO:0051298]; ciliary basal body-plasma membrane docking [GO:0097711]; de novo centriole assembly involved in multi-ciliated epithelial cell d…	GO:0000086; GO:0000242; GO:0005654; GO:0005813; GO:0005814; GO:0005829; GO:0007099; GO:0010389; GO:0019901; GO:0051298; GO:0097711; GO:0098535; GO:0098536	CEP152	195,626	610
CTR_vs_KIA0408	0.962663	0.203584	4.72858	3	0.0179237	0.0731874		1.74657	1.13556	0.962663	CEP162	Centrosomal protein of 162 kDa	FALSE	0.962663	Centrosomal protein of 162 kDa (Cep162) (Protein QN1 homolog)	CE162_HUMAN	SUBCELLULAR LOCATION: Cytoplasm, cytoskeleton, microtubule organizing center, centrosome, centriole. Cytoplasm, cytoskeleton, spindle. Nucleus. Note=Localizes to the distal end of centrioles throughout the cell cycle. During ciliogenesis, found at the cilia base. Localizes to spindle microtubules during mitosis.	axonemal microtubule [GO:0005879]; centriole [GO:0005814]; centrosome [GO:0005813]; cytosol [GO:0005829]; nucleus [GO:0005634]; spindle [GO:0005819]; ciliary basal body-plasma membrane docking [GO:0097711]; cilium assembly [GO:0060271]	GO:0005634; GO:0005813; GO:0005814; GO:0005819; GO:0005829; GO:0005879; GO:0060271; GO:0097711	CEP162	161,943	2814
CTR_vs_KIA0408	1.28293	0.165087	7.77124	3	0.004433	0.0383031		2.3533	1.41677	1.28293	CEP164	Centrosomal protein of 164 kDa	FALSE	1.28293	Centrosomal protein of 164 kDa (Cep164)	CE164_HUMAN	SUBCELLULAR LOCATION: Cytoplasm, cytoskeleton, microtubule organizing center, centrosome, centriole {ECO:0000269|PubMed:26337392}. Nucleus. Note=Localizes specifically to very distally located appendage structures on the mature centriole from which initiate PC formation (PubMed:26337392). Persisted at centrioles throughout mitosis. Expressed in chromatin-enriched nuclear fraction of HeLa cells. I…	centriole [GO:0005814]; centrosome [GO:0005813]; ciliary transition fiber [GO:0097539]; cytosol [GO:0005829]; extracellular space [GO:0005615]; intracellular membrane-bounded organelle [GO:0043231]; nucleoplasm [GO:0005654]; cell division [GO:0051301]; ciliary basal body-plasma membrane docking [GO:0097711]; cilium assembly [GO:0060271]; DNA repair [GO:0006281]; G2/M transition of mitotic cell cy…	GO:0000086; GO:0005615; GO:0005654; GO:0005813; GO:0005814; GO:0005829; GO:0006281; GO:0010389; GO:0043231; GO:0051301; GO:0060271; GO:0097539; GO:0097711	CEP164	164,314	5361
CTR_vs_KIA0408	-0.078209	0.174695	-0.44769	3	0.68473	0.76748		0.164481	0.114933	0.078209	CEP170	Centrosomal protein of 170 kDa	FALSE	0.078209	Centrosomal protein of 170 kDa (Cep170) (KARP-1-binding protein) (KARP1-binding protein)	CE170_HUMAN	SUBCELLULAR LOCATION: Cytoplasm, cytoskeleton, microtubule organizing center, centrosome, centriole {ECO:0000269|PubMed:15616186, ECO:0000269|PubMed:23386061}. Cytoplasm, cytoskeleton, spindle {ECO:0000269|PubMed:15616186}. Note=Associated with the mature mother centriole. Associated with spindle microtubules during mitosis. Localizes to the distal appendage region of the centriole. {ECO:0000269|…	centriolar subdistal appendage [GO:0120103]; centriole [GO:0005814]; centrosome [GO:0005813]; cytosol [GO:0005829]; microtubule [GO:0005874]; plasma membrane [GO:0005886]; spindle [GO:0005819]	GO:0005813; GO:0005814; GO:0005819; GO:0005829; GO:0005874; GO:0005886; GO:0120103	CEP170	175,293	2774
CTR_vs_KIA0408	0.196865	0.182285	1.07999	3	0.359232	0.482245		0.444625	0.316732	0.196865	CEP170B	Centrosomal protein of 170 kDa protein B	FALSE	0.196865	Centrosomal protein of 170 kDa protein B (Centrosomal protein 170B) (Cep170B)	C170B_HUMAN	SUBCELLULAR LOCATION: Cytoplasm, cytoskeleton {ECO:0000250|UniProtKB:Q498L0}.	cytoplasm [GO:0005737]; microtubule [GO:0005874]	GO:0005737; GO:0005874	CEP170B	171,688	5524
CTR_vs_KIA0408	2.22501	0.178579	12.4595	3	0.00111426	0.0202687		2.95302	1.69317	2.22501	CEP192	Centrosomal protein of 192 kDa	FALSE	2.22501	Centrosomal protein of 192 kDa (Cep192)	CE192_HUMAN	SUBCELLULAR LOCATION: Cytoplasm, cytoskeleton, microtubule organizing center, centrosome, centriole {ECO:0000269|PubMed:14654843, ECO:0000269|PubMed:17980596, ECO:0000269|PubMed:18207742}. Note=Pericentriolar location in mitotic centrosomes.	centriole [GO:0005814]; centrosome [GO:0005813]; cytosol [GO:0005829]; pericentriolar material [GO:0000242]; phosphatase binding [GO:0019902]; centrosome-templated microtubule nucleation [GO:0090222]; ciliary basal body-plasma membrane docking [GO:0097711]; G2/M transition of mitotic cell cycle [GO:0000086]; mitotic spindle assembly [GO:0090307]; negative regulation of phosphatase activity [GO:00…	GO:0000086; GO:0000242; GO:0005813; GO:0005814; GO:0005829; GO:0010389; GO:0010923; GO:0019902; GO:0071539; GO:0090222; GO:0090307; GO:0097711	CEP192	213,146	3643
CTR_vs_KIA0408	1.84534	0.409303	4.50849	3	0.0203868	0.0787432		1.69065	1.10379	1.84534	CEP20	Centrosomal protein 20	FALSE	1.84534	LisH domain-containing protein FOPNL (FGFR1OP N-terminal-like protein) (FOP-related protein of 20 kDa)	FOPNL_HUMAN	SUBCELLULAR LOCATION: Cytoplasm, cytoskeleton, microtubule organizing center, centrosome, centriole {ECO:0000269|PubMed:26643951}. Cell projection, cilium {ECO:0000250}. Cytoplasm, cytoskeleton, cilium basal body {ECO:0000250}. Cytoplasm, cytoskeleton, microtubule organizing center, centrosome {ECO:0000269|PubMed:20551181, ECO:0000269|PubMed:24018379}. Cytoplasmic granule {ECO:0000269|PubMed:2055…	centriolar satellite [GO:0034451]; centriole [GO:0005814]; centrosome [GO:0005813]; ciliary basal body [GO:0036064]; motile cilium [GO:0031514]; nucleus [GO:0005634]; cilium assembly [GO:0060271]; microtubule anchoring [GO:0034453]	GO:0005634; GO:0005813; GO:0005814; GO:0031514; GO:0034451; GO:0034453; GO:0036064; GO:0060271	FOPNL	19,778	4075
CTR_vs_KIA0408	0.982626	0.18601	5.28264	3	0.0132296	0.0620648		1.87845	1.20715	0.982626	CEP250	Centrosome-associated protein CEP250	FALSE	0.982626	Centrosome-associated protein CEP250 (250 kDa centrosomal protein) (Cep250) (Centrosomal Nek2-associated protein 1) (C-Nap1) (Centrosomal protein 2)	CP250_HUMAN	SUBCELLULAR LOCATION: Cytoplasm, perinuclear region {ECO:0000269|PubMed:9647649}. Cytoplasm, cytoskeleton, microtubule organizing center, centrosome, centriole {ECO:0000269|PubMed:26337392, ECO:0000269|PubMed:9647649}. Cytoplasm, cytoskeleton, cilium basal body {ECO:0000269|PubMed:9647649}. Note=Component of the core centrosome. In interphase cells, it specifically associates with the proximal en…	centriole [GO:0005814]; centrosome [GO:0005813]; cilium [GO:0005929]; cytosol [GO:0005829]; extracellular exosome [GO:0070062]; microtubule organizing center [GO:0005815]; perinuclear region of cytoplasm [GO:0048471]; protein-containing complex [GO:0032991]; protein C-terminus binding [GO:0008022]; protein domain specific binding [GO:0019904]; protein kinase binding [GO:0019901]; centriole-centri…	GO:0000086; GO:0000278; GO:0005813; GO:0005814; GO:0005815; GO:0005829; GO:0005929; GO:0008022; GO:0008104; GO:0010389; GO:0010457; GO:0019901; GO:0019904; GO:0030997; GO:0032991; GO:0033365; GO:0048471; GO:0070062; GO:0097711; GO:1904781; GO:1905515	CEP250	281,137	4342
CTR_vs_KIA0408	1.0862	0.136921	7.93305	3	0.00417684	0.0370917		2.37915	1.43072	1.0862	CEP290	Centrosomal protein of 290 kDa	FALSE	1.0862	Centrosomal protein of 290 kDa (Cep290) (Bardet-Biedl syndrome 14 protein) (Cancer/testis antigen 87) (CT87) (Nephrocystin-6) (Tumor antigen se2-2)	CE290_HUMAN	SUBCELLULAR LOCATION: Cytoplasm, cytoskeleton, microtubule organizing center, centrosome {ECO:0000269|PubMed:14654843, ECO:0000269|PubMed:16682973, ECO:0000269|PubMed:21493627, ECO:0000269|PubMed:21565611, ECO:0000269|PubMed:22797915}. Cytoplasm, cytoskeleton, microtubule organizing center, centrosome, centriolar satellite {ECO:0000269|PubMed:17705300, ECO:0000269|PubMed:21493627, ECO:0000269|Pub…	centriolar satellite [GO:0034451]; centriole [GO:0005814]; centrosome [GO:0005813]; ciliary basal body [GO:0036064]; ciliary transition zone [GO:0035869]; cytoplasm [GO:0005737]; cytosol [GO:0005829]; extracellular region [GO:0005576]; membrane [GO:0016020]; MKS complex [GO:0036038]; nucleus [GO:0005634]; photoreceptor connecting cilium [GO:0032391]; protein-containing complex [GO:0032991]; speci…	GO:0000086; GO:0005576; GO:0005634; GO:0005737; GO:0005813; GO:0005814; GO:0005829; GO:0010389; GO:0015031; GO:0016020; GO:0030902; GO:0030916; GO:0032391; GO:0032991; GO:0034451; GO:0035580; GO:0035869; GO:0036038; GO:0036064; GO:0042462; GO:0042802; GO:0043312; GO:0045893; GO:0048793; GO:0060271; GO:0070201; GO:0090316; GO:0097711	CEP290	290,386	206
CTR_vs_KIA0408	0.526166	0.164432	3.1999	3	0.0493356	0.129518		1.30684	0.887671	0.526166	CEP350	Centrosome-associated protein 350	FALSE	0.526166	Centrosome-associated protein 350 (Cep350) (Centrosome-associated protein of 350 kDa)	CE350_HUMAN	SUBCELLULAR LOCATION: Cytoplasm, cytoskeleton, microtubule organizing center, centrosome {ECO:0000269|PubMed:14654843, ECO:0000269|PubMed:16314388, ECO:0000269|PubMed:19052644, ECO:0000269|PubMed:28659385}. Cytoplasm, cytoskeleton, spindle {ECO:0000269|PubMed:16314388}. Nucleus {ECO:0000269|PubMed:15615782}. Cytoplasm, cytoskeleton, microtubule organizing center, centrosome, centriole {ECO:000026…	cell projection [GO:0042995]; centriole [GO:0005814]; centrosome [GO:0005813]; membrane [GO:0016020]; nucleus [GO:0005634]; spindle [GO:0005819]; microtubule binding [GO:0008017]; microtubule anchoring [GO:0034453]	GO:0005634; GO:0005813; GO:0005814; GO:0005819; GO:0008017; GO:0016020; GO:0034453; GO:0042995	CEP350	350,930	2830
CTR_vs_KIA0408	0.255018	0.0383656	6.64706	3	0.00693874	0.0449742		2.15872	1.34704	0.255018	CEP41	Centrosomal protein of 41 kDa	FALSE	0.255018	Centrosomal protein of 41 kDa (Cep41) (Testis-specific gene A14 protein)	CEP41_HUMAN	SUBCELLULAR LOCATION: Cytoplasm, cytoskeleton, microtubule organizing center, centrosome. Cell projection, cilium. Cytoplasm, cytoskeleton, cilium basal body. Note=Localizes mainly to the cilium basal body and in primary cilia.	centriole [GO:0005814]; centrosome [GO:0005813]; ciliary basal body [GO:0036064]; cilium [GO:0005929]; cytosol [GO:0005829]; membrane [GO:0016020]; ciliary basal body-plasma membrane docking [GO:0097711]; cilium assembly [GO:0060271]; G2/M transition of mitotic cell cycle [GO:0000086]; protein polyglutamylation [GO:0018095]; protein transport [GO:0015031]; regulation of G2/M transition of mitotic…	GO:0000086; GO:0005813; GO:0005814; GO:0005829; GO:0005929; GO:0010389; GO:0015031; GO:0016020; GO:0018095; GO:0036064; GO:0060271; GO:0097711	CEP41	41,368	4426
CTR_vs_KIA0408	0.112642	0.101193	1.11314	3	0.34681	0.470838		0.459908	0.327129	0.112642	CEP43	Centrosomal protein 43	FALSE	0.112642	FGFR1 oncogene partner	FR1OP_HUMAN	SUBCELLULAR LOCATION: Cytoplasm, cytoskeleton, microtubule organizing center, centrosome {ECO:0000269|PubMed:14654843, ECO:0000269|PubMed:16314388, ECO:0000269|PubMed:16690081, ECO:0000269|PubMed:28659385}. Cytoplasm, cytoskeleton, microtubule organizing center, centrosome, centriole {ECO:0000269|PubMed:28428259, ECO:0000269|PubMed:28625565, ECO:0000269|PubMed:28659385}. Cytoplasm, cytoskeleton, …	cell projection [GO:0042995]; centriole [GO:0005814]; centrosome [GO:0005813]; cytosol [GO:0005829]; nucleus [GO:0005634]; perinuclear region of cytoplasm [GO:0048471]; protein homodimerization activity [GO:0042803]; protein kinase binding [GO:0019901]; protein tyrosine kinase activity [GO:0004713]; protein tyrosine kinase inhibitor activity [GO:0030292]; ciliary basal body-plasma membrane dockin…	GO:0000086; GO:0004713; GO:0005634; GO:0005813; GO:0005814; GO:0005829; GO:0006469; GO:0008284; GO:0010389; GO:0019901; GO:0030292; GO:0030307; GO:0030335; GO:0034453; GO:0042803; GO:0042995; GO:0048471; GO:0097711	FGFR1OP	43,065	685
CTR_vs_KIA0408	0.548123	0.175721	3.11928	3	0.0525011	0.134938		1.27983	0.869866	0.548123	CEP44	Centrosomal protein of 44 kDa	FALSE	0.548123	Centrosomal protein of 44 kDa (Cep44) (HBV PreS1-transactivated protein 3) (PS1TP3)	CEP44_HUMAN	SUBCELLULAR LOCATION: Cytoplasm, cytoskeleton, microtubule organizing center, centrosome {ECO:0000269|PubMed:21399614}. Cytoplasm, cytoskeleton, spindle pole {ECO:0000269|PubMed:21399614}. Midbody {ECO:0000269|PubMed:21399614}. Note=Localizes to centrosomes, spindle poles, and weakly in midbody.	centrosome [GO:0005813]; cytoplasm [GO:0005737]; midbody [GO:0030496]; spindle pole [GO:0000922]	GO:0000922; GO:0005737; GO:0005813; GO:0030496	CEP44	44,140	4470
CTR_vs_KIA0408	0.825029	0.228877	3.60468	3	0.0366408	0.109903		1.43603	0.95899	0.825029	CEP55	Centrosomal protein of 55 kDa	FALSE	0.825029	Centrosomal protein of 55 kDa (Cep55) (Up-regulated in colon cancer 6)	CEP55_HUMAN	SUBCELLULAR LOCATION: Cytoplasm {ECO:0000269|PubMed:28264986}. Cytoplasm, cytoskeleton, microtubule organizing center, centrosome, centriole {ECO:0000269|PubMed:16198290}. Cytoplasm, cytoskeleton, microtubule organizing center, centrosome {ECO:0000269|PubMed:16198290}. Cleavage furrow {ECO:0000269|PubMed:16198290}. Midbody, Midbody ring {ECO:0000269|PubMed:16198290, ECO:0000269|PubMed:17853893, E…	centriole [GO:0005814]; centrosome [GO:0005813]; cleavage furrow [GO:0032154]; Flemming body [GO:0090543]; intercellular bridge [GO:0045171]; membrane [GO:0016020]; microtubule organizing center [GO:0005815]; midbody [GO:0030496]; plasma membrane [GO:0005886]; cell separation after cytokinesis [GO:0000920]; cranial skeletal system development [GO:1904888]; establishment of protein localization [G…	GO:0000281; GO:0000920; GO:0005813; GO:0005814; GO:0005815; GO:0005886; GO:0014066; GO:0016020; GO:0030496; GO:0032154; GO:0045171; GO:0045184; GO:0072001; GO:0090543; GO:1904888	CEP55	54,178	2689
CTR_vs_KIA0408	0.854057	1.15142	0.741741	3	0.512035	0.623082		0.290701	0.205454	0.854057	CEP57	Centrosomal protein of 57 kDa	FALSE	0.854057	Centrosomal protein of 57 kDa (Cep57) (FGF2-interacting protein) (Testis-specific protein 57) (Translokin)	CEP57_HUMAN	SUBCELLULAR LOCATION: Nucleus {ECO:0000250}. Cytoplasm. Cytoplasm, cytoskeleton, microtubule organizing center, centrosome.	centrosome [GO:0005813]; cytosol [GO:0005829]; Golgi apparatus [GO:0005794]; microtubule [GO:0005874]; nucleus [GO:0005634]; fibroblast growth factor binding [GO:0017134]; gamma-tubulin binding [GO:0043015]; microtubule binding [GO:0008017]; protein homodimerization activity [GO:0042803]; ciliary basal body-plasma membrane docking [GO:0097711]; fibroblast growth factor receptor signaling pathway …	GO:0000060; GO:0000070; GO:0000086; GO:0005634; GO:0005794; GO:0005813; GO:0005829; GO:0005874; GO:0007286; GO:0008017; GO:0008543; GO:0010389; GO:0017134; GO:0034453; GO:0042803; GO:0043015; GO:0051260; GO:0097711	CEP57	57,089	3261
CTR_vs_KIA0408	0.576517	0.363511	1.58597	3	0.210932	0.330028		0.675858	0.481449	0.576517	CEP57L1	Centrosomal protein CEP57L1	FALSE	0.576517	Centrosomal protein CEP57L1 (Centrosomal protein 57kDa-like protein 1) (Centrosomal protein of 57 kDa-related protein) (Cep57R) (Cep57-related protein)	CE57L_HUMAN	SUBCELLULAR LOCATION: Cytoplasm, cytoskeleton, microtubule organizing center, centrosome {ECO:0000250}.	centrosome [GO:0005813]; cytoplasm [GO:0005737]; microtubule [GO:0005874]; gamma-tubulin binding [GO:0043015]; identical protein binding [GO:0042802]; microtubule binding [GO:0008017]; mitotic sister chromatid segregation [GO:0000070]	GO:0000070; GO:0005737; GO:0005813; GO:0005874; GO:0008017; GO:0042802; GO:0043015	CEP57L1	53,649	3373
CTR_vs_KIA0408	0.852097	0.238954	3.56595	3	0.0376603	0.11142		1.42412	0.953037	0.852097	CEP63	Centrosomal protein of 63 kDa	FALSE	0.852097	Centrosomal protein of 63 kDa (Cep63)	CEP63_HUMAN	SUBCELLULAR LOCATION: Cytoplasm, cytoskeleton, microtubule organizing center, centrosome {ECO:0000269|PubMed:26297806}. Cytoplasm, cytoskeleton, microtubule organizing center, centrosome, centriole {ECO:0000269|PubMed:21983783, ECO:0000269|PubMed:26297806}. Cytoplasm, cytoskeleton, microtubule organizing center, centrosome, centriolar satellite {ECO:0000269|PubMed:24613305}. Note=Colocalizes with…	centriole [GO:0005814]; centrosome [GO:0005813]; cytosol [GO:0005829]; spindle pole [GO:0000922]; cell division [GO:0051301]; centriole replication [GO:0007099]; ciliary basal body-plasma membrane docking [GO:0097711]; de novo centriole assembly involved in multi-ciliated epithelial cell differentiation [GO:0098535]; DNA damage checkpoint [GO:0000077]; G2/M transition of mitotic cell cycle [GO:00…	GO:0000077; GO:0000086; GO:0000922; GO:0005813; GO:0005814; GO:0005829; GO:0007099; GO:0010389; GO:0042770; GO:0051225; GO:0051301; GO:0097711; GO:0098535	CEP63	81,344	4066
CTR_vs_KIA0408	0.941749	0.527869	1.78406	3	0.172413	0.290307		0.763429	0.537142	0.941749	CEP68	Centrosomal protein of 68 kDa	FALSE	0.941749	Centrosomal protein of 68 kDa (Cep68)	CEP68_HUMAN	SUBCELLULAR LOCATION: Cytoplasm, cytoskeleton, microtubule organizing center, centrosome {ECO:0000269|PubMed:14654843, ECO:0000269|PubMed:18042621, ECO:0000269|PubMed:25503564, ECO:0000269|PubMed:25704143}. Note=Localizes to thin fibers protruding away from the proximal ends of the two centrioles. Dissociates from interphase centrosomes at the onset of mitosis. {ECO:0000269|PubMed:18042621, ECO:0…	cell junction [GO:0030054]; centrosome [GO:0005813]; cytosol [GO:0005829]; microtubule organizing center [GO:0005815]; nucleus [GO:0005634]; protein domain specific binding [GO:0019904]; protein kinase binding [GO:0019901]; centriole-centriole cohesion [GO:0010457]; centrosome cycle [GO:0007098]; protein localization to organelle [GO:0033365]	GO:0005634; GO:0005813; GO:0005815; GO:0005829; GO:0007098; GO:0010457; GO:0019901; GO:0019904; GO:0030054; GO:0033365	CEP68	81,102	3078
CTR_vs_KIA0408	1.65243	0.150263	10.997	3	0.00161017	0.0236365		2.79313	1.62642	1.65243	CEP72	Centrosomal protein of 72 kDa	FALSE	1.65243	Centrosomal protein of 72 kDa (Cep72)	CEP72_HUMAN	SUBCELLULAR LOCATION: Cytoplasm, cytoskeleton, microtubule organizing center, centrosome {ECO:0000269|PubMed:14654843, ECO:0000269|PubMed:19536135}. Cytoplasm, cytoskeleton, microtubule organizing center, centrosome, centriolar satellite {ECO:0000269|PubMed:26297806}. Note=Localizes to the centrosome and centrosome-surrounding particles throughout the cell cycle. These particles disappear after m…	centriolar satellite [GO:0034451]; centrosome [GO:0005813]; cytosol [GO:0005829]; identical protein binding [GO:0042802]; centriole replication [GO:0007099]; ciliary basal body-plasma membrane docking [GO:0097711]; G2/M transition of mitotic cell cycle [GO:0000086]; gamma-tubulin complex localization [GO:0033566]; regulation of G2/M transition of mitotic cell cycle [GO:0010389]; regulation of pro…	GO:0000086; GO:0005813; GO:0005829; GO:0007051; GO:0007099; GO:0010389; GO:0033566; GO:0034451; GO:0042802; GO:0097711; GO:1904779	CEP72	71,718	5055
CTR_vs_KIA0408	-0.0343543	0.360993	-0.0951661	3	0.930183	0.950753		0.0314314	0.0219323	0.0343543	CEP76	Centrosomal protein of 76 kDa	FALSE	0.0343543	Centrosomal protein of 76 kDa (Cep76)	CEP76_HUMAN	SUBCELLULAR LOCATION: Cytoplasm, cytoskeleton, microtubule organizing center, centrosome. Cytoplasm, cytoskeleton, microtubule organizing center, centrosome, centriole. Note=Does not localize along the ciliary axoneme.	centriole [GO:0005814]; centrosome [GO:0005813]; cytosol [GO:0005829]; protein-containing complex [GO:0032991]; ciliary basal body-plasma membrane docking [GO:0097711]; G2/M transition of mitotic cell cycle [GO:0000086]; regulation of centriole replication [GO:0046599]; regulation of G2/M transition of mitotic cell cycle [GO:0010389]	GO:0000086; GO:0005813; GO:0005814; GO:0005829; GO:0010389; GO:0032991; GO:0046599; GO:0097711	CEP76	74,413	3586
CTR_vs_KIA0408	0.371228	0.236453	1.56999	3	0.214441	0.334042		0.668693	0.4762	0.371228	CEP78	Centrosomal protein of 78 kDa	FALSE	0.371228	Centrosomal protein of 78 kDa (Cep78)	CEP78_HUMAN	SUBCELLULAR LOCATION: Cytoplasm, cytoskeleton, microtubule organizing center, centrosome {ECO:0000269|PubMed:14654843}. Cytoplasm, cytoskeleton, microtubule organizing center, centrosome, centriole {ECO:0000269|PubMed:27246242}. Cytoplasm, cytoskeleton, cilium basal body {ECO:0000269|PubMed:27588451}. Note=Mainly localizes at the centriolar wall, but also found in the pericentriolar material (Pub…	centriole [GO:0005814]; centrosome [GO:0005813]; ciliary basal body [GO:0036064]; cytosol [GO:0005829]; ciliary basal body-plasma membrane docking [GO:0097711]; cilium organization [GO:0044782]; G2/M transition of mitotic cell cycle [GO:0000086]; regulation of G2/M transition of mitotic cell cycle [GO:0010389]	GO:0000086; GO:0005813; GO:0005814; GO:0005829; GO:0010389; GO:0036064; GO:0044782; GO:0097711	CEP78	76,396	2748
CTR_vs_KIA0408	1.24317	0.43532	2.85577	3	0.0648013	0.153407		1.18842	0.814156	1.24317	CEP83	Centrosomal protein of 83 kDa	FALSE	1.24317	Centrosomal protein of 83 kDa (Cep83) (Coiled-coil domain-containing protein 41) (Renal carcinoma antigen NY-REN-58)	CEP83_HUMAN	SUBCELLULAR LOCATION: Cytoplasm, cytoskeleton, microtubule organizing center, centrosome, centriole {ECO:0000269|PubMed:23348840, ECO:0000269|PubMed:23530209}. Note=Localizes specifically to the distal appendage region of the centriole, which anchors the mother centriole to the plasma membrane. Localizes to centrioles at all stages of the cell cycle, including mitosis.	centriole [GO:0005814]; ciliary transition fiber [GO:0097539]; cytosol [GO:0005829]; Golgi apparatus [GO:0005794]; ciliary basal body-plasma membrane docking [GO:0097711]; cilium assembly [GO:0060271]; protein localization to centrosome [GO:0071539]; vesicle docking [GO:0048278]	GO:0005794; GO:0005814; GO:0005829; GO:0048278; GO:0060271; GO:0071539; GO:0097539; GO:0097711	CEP83	82,059	5548
CTR_vs_KIA0408	1.04823	0.16973	6.17586	3	0.00854741	0.0508402		2.06817	1.29379	1.04823	CEP85	Centrosomal protein of 85 kDa	FALSE	1.04823	Centrosomal protein of 85 kDa (Cep85) (Coiled-coil domain-containing protein 21)	CEP85_HUMAN	SUBCELLULAR LOCATION: Cytoplasm, cytoskeleton, microtubule organizing center, centrosome {ECO:0000269|PubMed:21399614, ECO:0000269|PubMed:26220856}. Cytoplasm, cytoskeleton, spindle pole {ECO:0000269|PubMed:21399614, ECO:0000269|PubMed:26220856}. Nucleus, nucleolus {ECO:0000269|PubMed:21399614}. Note=Localizes to centrosomes and nucleolus in interphase. Upon entry into mitosis, relocates from nuc…	centrosome [GO:0005813]; cytosol [GO:0005829]; Golgi apparatus [GO:0005794]; microtubule organizing center [GO:0005815]; mitochondrion [GO:0005739]; nucleolus [GO:0005730]; pericentriolar material [GO:0000242]; spindle pole [GO:0000922]; chromosome segregation [GO:0007059]; negative regulation of protein kinase activity [GO:0006469]; regulation of mitotic centrosome separation [GO:0046602]	GO:0000242; GO:0000922; GO:0005730; GO:0005739; GO:0005794; GO:0005813; GO:0005815; GO:0005829; GO:0006469; GO:0007059; GO:0046602	CEP85	85,639	2959
CTR_vs_KIA0408	2.58619	0.181618	14.2397	3	0.000750427	0.017522		3.12469	1.75642	2.58619	CEP85L	Centrosomal protein of 85 kDa-like	FALSE	2.58619	Centrosomal protein of 85 kDa-like (Serologically defined breast cancer antigen NY-BR-15)	CE85L_HUMAN	SUBCELLULAR LOCATION: Cytoplasm, cytoskeleton, microtubule organizing center, centrosome {ECO:0000305|PubMed:21399614}. Note=Subcellular experiments using a GFP-tagged system produced a weak signal, rendering it difficult to confirm centrosome association.	centrosome [GO:0005813]; cytoplasm [GO:0005737]	GO:0005737; GO:0005813	CEP85L	91,808	2780
CTR_vs_KIA0408	1.52505	0.150351	10.1433	3	0.00204147	0.0267717		2.69006	1.57232	1.52505	CEP89	Centrosomal protein of 89 kDa	FALSE	1.52505	Centrosomal protein of 89 kDa (Cep89) (Centrosomal protein 123) (Cep123) (Coiled-coil domain-containing protein 123)	CEP89_HUMAN	SUBCELLULAR LOCATION: Cytoplasm, cytosol. Cytoplasm, cytoskeleton, microtubule organizing center, centrosome. Cytoplasm, cytoskeleton, spindle pole. Cytoplasm, cytoskeleton, microtubule organizing center, centrosome, centriole. Mitochondrion intermembrane space. Note=Localizes to the distal appendage region of the centriole, which anchors the mother centriole to the plasma membrane.	centriole [GO:0005814]; centrosome [GO:0005813]; ciliary transition fiber [GO:0097539]; cytosol [GO:0005829]; mitochondrial intermembrane space [GO:0005758]; motile cilium [GO:0031514]; non-motile cilium [GO:0097730]; plasma membrane [GO:0005886]; spindle pole [GO:0000922]; chemical synaptic transmission [GO:0007268]; ciliary basal body-plasma membrane docking [GO:0097711]; cilium assembly [GO:00…	GO:0000922; GO:0005758; GO:0005813; GO:0005814; GO:0005829; GO:0005886; GO:0007005; GO:0007268; GO:0031514; GO:0060271; GO:0097539; GO:0097711; GO:0097730; GO:1905515	CEP89	89,590	4148
CTR_vs_KIA0408	1.95804	0.287598	6.80827	3	0.00648066	0.0435244		2.18838	1.36127	1.95804	CEP95	Centrosomal protein of 95 kDa	FALSE	1.95804	Centrosomal protein of 95 kDa (Cep95) (Coiled-coil domain-containing protein 45)	CEP95_HUMAN	SUBCELLULAR LOCATION: Cytoplasm, cytoskeleton, microtubule organizing center, centrosome {ECO:0000269|PubMed:21399614}. Cytoplasm, cytoskeleton, spindle pole {ECO:0000269|PubMed:21399614}.	centrosome [GO:0005813]; cytoplasm [GO:0005737]; spindle pole [GO:0000922]	GO:0000922; GO:0005737; GO:0005813	CEP95	95,297	3981
CTR_vs_KIA0408	1.57519	0.222964	7.06475	3	0.00583054	0.0420186		2.23429	1.37656	1.57519	CEP97	Centrosomal protein of 97 kDa	FALSE	1.57519	Centrosomal protein of 97 kDa (Cep97) (Leucine-rich repeat and IQ domain-containing protein 2)	CEP97_HUMAN	SUBCELLULAR LOCATION: Cytoplasm, cytoskeleton, microtubule organizing center, centrosome {ECO:0000269|PubMed:17719545}.	centrosome [GO:0005813]; cytosol [GO:0005829]; microtubule organizing center [GO:0005815]; protein-containing complex [GO:0032991]; calmodulin binding [GO:0005516]; ciliary basal body-plasma membrane docking [GO:0097711]; negative regulation of cilium assembly [GO:1902018]; regulation of mitotic spindle assembly [GO:1901673]	GO:0005516; GO:0005813; GO:0005815; GO:0005829; GO:0032991; GO:0097711; GO:1901673; GO:1902018	CEP97	96,981	3301
CTR_vs_KIA0408	-0.247142	0.470254	-0.525551	3	0.635571	0.729349		0.196836	0.137065	0.247142	CETN2	Centrin-2	FALSE	0.247142	Centrin-2 (Caltractin isoform 1)	CETN2_HUMAN	SUBCELLULAR LOCATION: Cytoplasm, cytoskeleton, microtubule organizing center, centrosome, centriole. Nucleus {ECO:0000305}. Note=Centrosome of S-phase, interphase and mitotic cells.	centriole [GO:0005814]; centrosome [GO:0005813]; ciliary basal body [GO:0036064]; cytosol [GO:0005829]; intracellular [GO:0005622]; nucleoplasm [GO:0005654]; photoreceptor connecting cilium [GO:0032391]; XPC complex [GO:0071942]; calcium ion binding [GO:0005509]; G-protein beta/gamma-subunit complex binding [GO:0031683]; heterotrimeric G-protein binding [GO:0032795]; microtubule binding [GO:00080…	GO:0000086; GO:0000278; GO:0000715; GO:0005509; GO:0005622; GO:0005654; GO:0005813; GO:0005814; GO:0005829; GO:0006289; GO:0006294; GO:0007099; GO:0007283; GO:0008017; GO:0010389; GO:0031683; GO:0032391; GO:0032465; GO:0032795; GO:0036064; GO:0051301; GO:0070911; GO:0071942; GO:0097711	CETN2	19,738	1400
CTR_vs_KIA0408	-1.41708	0.224199	-6.32062	3	0.00800532	0.0485921		2.09662	1.31343	1.41708	CFAP157	Cilia- and flagella-associated protein 157	FALSE	1.41708	Cilia- and flagella-associated protein 157	CF157_HUMAN	SUBCELLULAR LOCATION: Cytoplasm, cytoskeleton, cilium basal body {ECO:0000250|UniProtKB:Q0VFX2}.	ciliary basal body [GO:0036064]; cytosol [GO:0005829]; intracellular membrane-bounded organelle [GO:0043231]; plasma membrane [GO:0005886]; microtubule binding [GO:0008017]; sperm axoneme assembly [GO:0007288]	GO:0005829; GO:0005886; GO:0007288; GO:0008017; GO:0036064; GO:0043231	CFAP157	60,533	2750
CTR_vs_KIA0408	-0.0635082	0.128087	-0.49582	3	0.654069	0.74271		0.184376	0.129181	0.0635082	CFAP20	Cilia- and flagella-associated protein 20	FALSE	0.0635082	Cilia- and flagella-associated protein 20 (Basal body up-regulated protein 22) (Transcription factor IIB)	CFA20_HUMAN	SUBCELLULAR LOCATION: Nucleus. Cytoplasm, cytoskeleton, microtubule organizing center, centrosome, centriole. Cytoplasm, cytoskeleton, cilium basal body. Cell projection, cilium.	centriole [GO:0005814]; ciliary basal body [GO:0036064]; cilium [GO:0005929]; extracellular exosome [GO:0070062]; microtubule [GO:0005874]; nucleus [GO:0005634]; RNA binding [GO:0003723]; cilium assembly [GO:0060271]; multicellular organism development [GO:0007275]; positive regulation of cell motility [GO:2000147]; positive regulation of feeding behavior [GO:2000253]; protein polyglutamylation […	GO:0003723; GO:0005634; GO:0005814; GO:0005874; GO:0005929; GO:0007275; GO:0018095; GO:0036064; GO:0060271; GO:0060296; GO:0070062; GO:2000147; GO:2000253	CFAP20	22,774	5600
CTR_vs_KIA0408	-0.854934	0.373728	-2.28758	3	0.106192	0.210356		0.973909	0.677045	0.854934	CFAP298	Cilia- and flagella-associated protein 298	FALSE	0.854934	UPF0769 protein C21orf59 (Protein kurly homolog)	CU059_HUMAN	SUBCELLULAR LOCATION: Cytoplasm {ECO:0000250|UniProtKB:Q5U3Z0}. Cytoplasm, cytoskeleton, cilium basal body {ECO:0000250|UniProtKB:A0A1L8HCK2}. Note=Partially colocalized with SASS6 in cytoplasmic puncta, suggesting a centrosomal localization. {ECO:0000250|UniProtKB:Q5U3Z0}.	cilium [GO:0005929]; cytoskeleton [GO:0005856]; cytosol [GO:0005829]; nucleus [GO:0005634]; cell projection morphogenesis [GO:0048858]; cilium assembly [GO:0060271]; regulation of cilium movement [GO:0003352]	GO:0003352; GO:0005634; GO:0005829; GO:0005856; GO:0005929; GO:0048858; GO:0060271	C21orf59	33,224	1751
CTR_vs_KIA0408	-1.21486	0.311979	-3.89404	3	0.0300402	0.0982629		1.5223	1.00761	1.21486	CFAP36	Cilia- and flagella-associated protein 36	FALSE	1.21486	Cilia- and flagella-associated protein 36 (Coiled-coil domain-containing protein 104)	CFA36_HUMAN	SUBCELLULAR LOCATION: Nucleus {ECO:0000303|PubMed:19680650}. Cytoplasm {ECO:0000303|PubMed:19680650}. Cell projection, cilium, flagellum {ECO:0000305}.	ciliary base [GO:0097546]; ciliary transition zone [GO:0035869]; cytoplasm [GO:0005737]; motile cilium [GO:0031514]; nucleus [GO:0005634]; protein N-terminus binding [GO:0047485]	GO:0005634; GO:0005737; GO:0031514; GO:0035869; GO:0047485; GO:0097546	CFAP36	39,447	3976
CTR_vs_KIA0408	-0.490829	0.449758	-1.09132	3	0.354939	0.478326		0.449846	0.320276	0.490829	CFAP410	Cilia- and flagella-associated protein 410	FALSE	0.490829	Protein C21orf2 (C21orf-HUMF09G8.5) (Leucine-rich repeat-containing protein 76) (YF5/A2)	CU002_HUMAN	SUBCELLULAR LOCATION: Mitochondrion {ECO:0000269|PubMed:9325172}. Cytoplasm, cytoskeleton, cilium basal body {ECO:0000269|PubMed:26167768, ECO:0000269|PubMed:26294103}. Cell projection, cilium, photoreceptor outer segment {ECO:0000269|PubMed:27548899}. Cytoplasm {ECO:0000269|PubMed:26290490}. Note=Colocalizes with NEK1 and SPATA7 at the basal body. {ECO:0000269|PubMed:26167768}.	ciliary basal body [GO:0036064]; cytoplasm [GO:0005737]; mitochondrion [GO:0005739]; photoreceptor connecting cilium [GO:0032391]; photoreceptor outer segment [GO:0001750]; plasma membrane [GO:0005886]; cilium assembly [GO:0060271]; cytoskeleton organization [GO:0007010]; DNA damage response, detection of DNA damage [GO:0042769]; regulation of cell shape [GO:0008360]; smoothened signaling pathway…	GO:0001750; GO:0005737; GO:0005739; GO:0005886; GO:0007010; GO:0007224; GO:0008360; GO:0032391; GO:0036064; GO:0042769; GO:0060271	C21orf2	28,340	347
CTR_vs_KIA0408	2.30122	0.239306	9.61625	3	0.00238671	0.0284652		2.6222	1.54569	2.30122	CFAP58	Cilia- and flagella-associated protein 58	FALSE	2.30122	Cilia- and flagella-associated protein 58 (Coiled-coil domain-containing protein 147)	CFA58_HUMAN	SUBCELLULAR LOCATION: Cell projection, cilium {ECO:0000250|UniProtKB:A8HUA1}.	cilium [GO:0005929]; extracellular space [GO:0005615]	GO:0005615; GO:0005929	CFAP58	103,417	2804
CTR_vs_KIA0408	0.103458	0.261516	0.39561	3	0.718847	0.796068		0.143363	0.0990498	0.103458	CFAP97	Cilia- and flagella-associated protein 97	FALSE	0.103458	Cilia- and flagella-associated protein 97	CFA97_HUMAN				CFAP97	59,475	5071
CTR_vs_KIA0408	-0.645605	0.125241	-5.15489	3	0.0141545	0.0641882		1.8491	1.19255	0.645605	CKAP5	Cytoskeleton-associated protein 5	FALSE	0.645605	Cytoskeleton-associated protein 5 (Colonic and hepatic tumor overexpressed gene protein) (Ch-TOG)	CKAP5_HUMAN	SUBCELLULAR LOCATION: Cytoplasm, cytoskeleton, microtubule organizing center, centrosome {ECO:0000269|PubMed:21646404, ECO:0000269|PubMed:25596274, ECO:0000269|PubMed:9570755}. Cytoplasm, cytoskeleton, spindle pole {ECO:0000269|PubMed:21646404}. Cytoplasm, cytoskeleton, spindle {ECO:0000269|PubMed:21297582, ECO:0000269|PubMed:25596274, ECO:0000269|PubMed:9570755}. Chromosome, centromere, kinetoch…	centrosome [GO:0005813]; condensed chromosome kinetochore [GO:0000777]; cytosol [GO:0005829]; kinetochore [GO:0000776]; membrane [GO:0016020]; nucleolus [GO:0005730]; plasma membrane [GO:0005886]; protein-containing complex [GO:0032991]; spindle pole [GO:0000922]; cadherin binding [GO:0045296]; microtubule plus-end binding [GO:0051010]; cell division [GO:0051301]; centrosome cycle [GO:0007098]; c…	GO:0000086; GO:0000776; GO:0000777; GO:0000922; GO:0005730; GO:0005813; GO:0005829; GO:0005886; GO:0007019; GO:0007051; GO:0007098; GO:0010389; GO:0016020; GO:0030951; GO:0032991; GO:0045296; GO:0046785; GO:0050658; GO:0051010; GO:0051298; GO:0051301; GO:0097711	CKAP5	225,495	2310
CTR_vs_KIA0408	2.30702	0.0472183	48.8585	3	1.88797e-05	0.0107734		4.72401	1.96765	2.30702	CNTROB	Centrobin	FALSE	2.30702	Centrobin (Centrosomal BRCA2-interacting protein) (LYST-interacting protein 8)	CNTRB_HUMAN	SUBCELLULAR LOCATION: Cytoplasm, cytoskeleton, microtubule organizing center, centrosome, centriole {ECO:0000269|PubMed:16275750}. Note=Centriole-associated, asymmetrically localizes to the daughter centriole.	centriole [GO:0005814]; centrosome [GO:0005813]; cytosol [GO:0005829]; protein domain specific binding [GO:0019904]; centriole replication [GO:0007099]; centrosome separation [GO:0051299]; mitotic cytokinetic process [GO:1902410]; regulation of cilium assembly [GO:1902017]	GO:0005813; GO:0005814; GO:0005829; GO:0007099; GO:0019904; GO:0051299; GO:1902017; GO:1902410	CNTROB	101,253	3397
CTR_vs_KIA0408	2.59857	0.255765	10.16	3	0.00203165	0.0267717		2.69215	1.57232	2.59857	CSPP1	Centrosome and spindle pole-associated protein 1	FALSE	2.59857	Centrosome and spindle pole-associated protein 1	CSPP1_HUMAN	SUBCELLULAR LOCATION: Cytoplasm, cytoskeleton, microtubule organizing center, centrosome. Cytoplasm, cytoskeleton, spindle. Cytoplasm, cytoskeleton, spindle pole {ECO:0000250}. Note=Associated with mitotic spindles.	centrosome [GO:0005813]; cytoplasm [GO:0005737]; microtubule [GO:0005874]; spindle [GO:0005819]; spindle pole [GO:0000922]; positive regulation of cell division [GO:0051781]; positive regulation of cytokinesis [GO:0032467]	GO:0000922; GO:0005737; GO:0005813; GO:0005819; GO:0005874; GO:0032467; GO:0051781	CSPP1	145,522	2604
CTR_vs_KIA0408	0.495344	0.186816	2.6515	3	0.0768949	0.170713		1.1141	0.767734	0.495344	CYLD	Ubiquitin carboxyl-terminal hydrolase CYLD	FALSE	0.495344	Ubiquitin carboxyl-terminal hydrolase CYLD (EC 3.4.19.12) (Deubiquitinating enzyme CYLD) (Ubiquitin thioesterase CYLD) (Ubiquitin-specific-processing protease CYLD)	CYLD_HUMAN	SUBCELLULAR LOCATION: Cytoplasm. Cytoplasm, perinuclear region. Cytoplasm, cytoskeleton. Cell membrane; Peripheral membrane protein; Cytoplasmic side. Cytoplasm, cytoskeleton, microtubule organizing center, centrosome {ECO:0000269|PubMed:25134987}. Cytoplasm, cytoskeleton, spindle {ECO:0000269|PubMed:25134987}. Cytoplasm, cytoskeleton, cilium basal body {ECO:0000250|UniProtKB:Q80TQ2}. Note=Detect…	centrosome [GO:0005813]; ciliary basal body [GO:0036064]; ciliary tip [GO:0097542]; cytosol [GO:0005829]; extrinsic component of cytoplasmic side of plasma membrane [GO:0031234]; microtubule [GO:0005874]; perinuclear region of cytoplasm [GO:0048471]; spindle [GO:0005819]; Lys48-specific deubiquitinase activity [GO:1990380]; Lys63-specific deubiquitinase activity [GO:0061578]; proline-rich region …	GO:0004843; GO:0005813; GO:0005819; GO:0005829; GO:0005874; GO:0006511; GO:0007049; GO:0007346; GO:0008270; GO:0010803; GO:0016055; GO:0016579; GO:0019901; GO:0031234; GO:0032088; GO:0032480; GO:0036064; GO:0036459; GO:0043369; GO:0043393; GO:0045087; GO:0045577; GO:0045581; GO:0045582; GO:0048471; GO:0048872; GO:0050862; GO:0061578; GO:0070064; GO:0070266; GO:0070423; GO:0070507; GO:0070536; GO:…	CYLD	107,316	4789
CTR_vs_KIA0408	0.584834	0.133093	4.39418	3	0.0218405	0.081758		1.66074	1.08747	0.584834	DYNC1H1	Cytoplasmic dynein 1 heavy chain 1	FALSE	0.584834	Cytoplasmic dynein 1 heavy chain 1 (Cytoplasmic dynein heavy chain 1) (Dynein heavy chain, cytosolic)	DYHC1_HUMAN	SUBCELLULAR LOCATION: Cytoplasm, cytoskeleton.	azurophil granule lumen [GO:0035578]; centrosome [GO:0005813]; cytoplasmic dynein complex [GO:0005868]; cytosol [GO:0005829]; extracellular exosome [GO:0070062]; extracellular region [GO:0005576]; filopodium [GO:0030175]; membrane [GO:0016020]; microtubule [GO:0005874]; ATP binding [GO:0005524]; ATPase activity [GO:0016887]; dynein intermediate chain binding [GO:0045505]; dynein light chain bindi…	GO:0000086; GO:0003723; GO:0003777; GO:0005524; GO:0005576; GO:0005813; GO:0005829; GO:0005868; GO:0005874; GO:0006888; GO:0007052; GO:0010389; GO:0016020; GO:0016887; GO:0019886; GO:0030175; GO:0031122; GO:0032388; GO:0033962; GO:0034063; GO:0035578; GO:0043312; GO:0045503; GO:0045505; GO:0051293; GO:0051301; GO:0051959; GO:0060236; GO:0070062; GO:0072382; GO:0090235; GO:0097711; GO:1905832	DYNC1H1	532,408	2345
CTR_vs_KIA0408	0.110299	0.16369	0.673827	3	0.548692	0.654277		0.260671	0.184238	0.110299	DYNC1I2	Cytoplasmic dynein 1 intermediate chain 2	FALSE	0.110299	Cytoplasmic dynein 1 intermediate chain 2 (Cytoplasmic dynein intermediate chain 2) (Dynein intermediate chain 2, cytosolic) (DH IC-2)	DC1I2_HUMAN	SUBCELLULAR LOCATION: Cytoplasm, cytoskeleton {ECO:0000250|UniProtKB:Q62871}.	centrosome [GO:0005813]; cytoplasm [GO:0005737]; cytoplasmic dynein complex [GO:0005868]; cytosol [GO:0005829]; microtubule [GO:0005874]; vesicle [GO:0031982]; dynein heavy chain binding [GO:0045504]; dynein light chain binding [GO:0045503]; microtubule motor activity [GO:0003777]; antigen processing and presentation of exogenous peptide antigen via MHC class II [GO:0019886]; ciliary basal body-p…	GO:0000086; GO:0003777; GO:0005737; GO:0005813; GO:0005829; GO:0005868; GO:0005874; GO:0006888; GO:0007018; GO:0010389; GO:0010970; GO:0016032; GO:0019886; GO:0031982; GO:0045503; GO:0045504; GO:0097711; GO:2000582	DYNC1I2	71,457	2225
CTR_vs_KIA0408	-0.532963	0.148267	-3.59462	3	0.0369022	0.110299		1.43295	0.957426	0.532963	DYNC1LI1	Cytoplasmic dynein 1 light intermediate chain 1	FALSE	0.532963	Cytoplasmic dynein 1 light intermediate chain 1 (LIC1) (Dynein light chain A) (DLC-A) (Dynein light intermediate chain 1, cytosolic)	DC1L1_HUMAN	SUBCELLULAR LOCATION: Cytoplasm {ECO:0000250}. Chromosome, centromere, kinetochore {ECO:0000269|PubMed:19229290}. Cytoplasm, cytoskeleton, spindle pole {ECO:0000269|PubMed:19229290}.	centrosome [GO:0005813]; condensed chromosome kinetochore [GO:0000777]; cytoplasmic dynein complex [GO:0005868]; cytosol [GO:0005829]; ficolin-1-rich granule membrane [GO:0101003]; kinetochore [GO:0000776]; membrane [GO:0016020]; microtubule [GO:0005874]; plasma membrane [GO:0005886]; secretory granule membrane [GO:0030667]; spindle pole [GO:0000922]; ATP binding [GO:0005524]; dynein heavy chain …	GO:0000226; GO:0000776; GO:0000777; GO:0000922; GO:0003723; GO:0003777; GO:0005524; GO:0005813; GO:0005829; GO:0005868; GO:0005874; GO:0005886; GO:0006888; GO:0007018; GO:0007049; GO:0016020; GO:0016032; GO:0019003; GO:0019886; GO:0030667; GO:0043312; GO:0045504; GO:0051301; GO:0090267; GO:0101003	DYNC1LI1	56,579	5613
CTR_vs_KIA0408	-0.314675	0.0963677	-3.26536	3	0.0469412	0.12653		1.32845	0.897805	0.314675	DYNC1LI2	Cytoplasmic dynein 1 light intermediate chain 2	FALSE	0.314675	Cytoplasmic dynein 1 light intermediate chain 2 (Dynein light intermediate chain 2, cytosolic) (LIC-2) (LIC53/55)	DC1L2_HUMAN	SUBCELLULAR LOCATION: Cytoplasm, cytoskeleton {ECO:0000250}.	centrosome [GO:0005813]; cytoplasmic dynein complex [GO:0005868]; cytosol [GO:0005829]; kinetochore [GO:0000776]; late endosome [GO:0005770]; lysosome [GO:0005764]; membrane [GO:0016020]; microtubule [GO:0005874]; ATP binding [GO:0005524]; dynein heavy chain binding [GO:0045504]; microtubule motor activity [GO:0003777]; antigen processing and presentation of exogenous peptide antigen via MHC clas…	GO:0000226; GO:0000776; GO:0003777; GO:0005524; GO:0005764; GO:0005770; GO:0005813; GO:0005829; GO:0005868; GO:0005874; GO:0006888; GO:0007018; GO:0016020; GO:0019886; GO:0045504; GO:0051260; GO:0051642; GO:1990090	DYNC1LI2	54,099	281
CTR_vs_KIA0408	-0.0824023	0.0555339	-1.48382	3	0.234503	0.356241		0.629851	0.448257	0.0824023	DYNC2H1	Cytoplasmic dynein 2 heavy chain 1	FALSE	0.0824023	Cytoplasmic dynein 2 heavy chain 1 (Cytoplasmic dynein 2 heavy chain) (Dynein cytoplasmic heavy chain 2) (Dynein heavy chain 11) (hDHC11) (Dynein heavy chain isotype 1B)	DYHC2_HUMAN	SUBCELLULAR LOCATION: Cytoplasm, cytoskeleton, cilium axoneme {ECO:0000250|UniProtKB:Q9JJ79}. Cell membrane {ECO:0000250|UniProtKB:Q45VK7}; Peripheral membrane protein {ECO:0000250|UniProtKB:Q45VK7}. Cytoplasm {ECO:0000250|UniProtKB:Q9JJ79}. Note=Localizes to the apical cytoplasm (By similarity). According to PubMed:8666668, it localizes to Golgi apparatus, cytoplasmic vesicle and endoplasmic ret…	apical part of cell [GO:0045177]; axoneme [GO:0005930]; ciliary tip [GO:0097542]; cilium [GO:0005929]; cytoplasmic dynein complex [GO:0005868]; extracellular exosome [GO:0070062]; Golgi apparatus [GO:0005794]; microtubule [GO:0005874]; motile cilium [GO:0031514]; plasma membrane [GO:0005886]; ATP binding [GO:0005524]; ATPase activity [GO:0016887]; dynein intermediate chain binding [GO:0045505]; d…	GO:0003774; GO:0003777; GO:0005524; GO:0005794; GO:0005868; GO:0005874; GO:0005886; GO:0005929; GO:0005930; GO:0007030; GO:0007368; GO:0009953; GO:0016485; GO:0016887; GO:0021522; GO:0030326; GO:0030900; GO:0031514; GO:0035721; GO:0035735; GO:0045177; GO:0045503; GO:0045505; GO:0045880; GO:0051959; GO:0060271; GO:0060976; GO:0061512; GO:0070062; GO:0097542; GO:1905515	DYNC2H1	492,622	3516
CTR_vs_KIA0408	-0.434474	0.154609	-2.81014	3	0.0672847	0.156757		1.17208	0.804772	0.434474	DYNC2I1	Cytoplasmic dynein 2 intermediate chain 1	FALSE	0.434474	WD repeat-containing protein 60	WDR60_HUMAN	SUBCELLULAR LOCATION: Cell projection, cilium {ECO:0000269|PubMed:23910462}. Note=Located at the base of the primary cilium in serum-starved fibroblasts.	ciliary base [GO:0097546]; ciliary tip [GO:0097542]; cilium [GO:0005929]; cytoplasmic dynein complex [GO:0005868]; extracellular space [GO:0005615]; pericentriolar material [GO:0000242]; dynein heavy chain binding [GO:0045504]; dynein light chain binding [GO:0045503]; cilium assembly [GO:0060271]; embryonic skeletal system morphogenesis [GO:0048704]; intraciliary transport involved in cilium asse…	GO:0000242; GO:0005615; GO:0005868; GO:0005929; GO:0007018; GO:0035735; GO:0045503; GO:0045504; GO:0048704; GO:0060271; GO:0097542; GO:0097546	WDR60	122,571	3701
CTR_vs_KIA0408	0.10806	0.0899387	1.20148	3	0.315765	0.439437		0.500636	0.357103	0.10806	DYNC2LI1	Cytoplasmic dynein 2 light intermediate chain 1	FALSE	0.10806	Cytoplasmic dynein 2 light intermediate chain 1 (Dynein 2 light intermediate chain)	DC2L1_HUMAN	SUBCELLULAR LOCATION: Cytoplasm {ECO:0000269|PubMed:26130459}. Cell projection, cilium {ECO:0000269|PubMed:26130459}. Cytoplasm, cytoskeleton, cilium basal body {ECO:0000269|PubMed:26130459}. Cytoplasm, cytoskeleton, cilium axoneme {ECO:0000250|UniProtKB:Q8K0T2}. Cytoplasm, cytoskeleton, microtubule organizing center, centrosome {ECO:0000269|PubMed:26130459}. Note=Localizes to the apical cytoplas…	apical part of cell [GO:0045177]; axoneme [GO:0005930]; centrosome [GO:0005813]; ciliary basal body [GO:0036064]; ciliary tip [GO:0097542]; ciliary transition zone [GO:0035869]; cilium [GO:0005929]; cytoplasm [GO:0005737]; cytoplasmic dynein complex [GO:0005868]; intraciliary transport particle [GO:0030990]; microtubule [GO:0005874]; motile cilium [GO:0031514]; dynein heavy chain binding [GO:0045…	GO:0003774; GO:0005737; GO:0005813; GO:0005868; GO:0005874; GO:0005929; GO:0005930; GO:0007368; GO:0030990; GO:0031514; GO:0035721; GO:0035735; GO:0035869; GO:0036064; GO:0045177; GO:0045504; GO:0097542; GO:1902017	DYNC2LI1	39,625	3616
CTR_vs_KIA0408	1.26744	0.28834	4.39564	3	0.0218211	0.081758		1.66112	1.08747	1.26744	DYNLL1	Dynein light chain 1, cytoplasmic	FALSE	1.26744	Dynein light chain 1, cytoplasmic (8 kDa dynein light chain) (DLC8) (Dynein light chain LC8-type 1) (Protein inhibitor of neuronal nitric oxide synthase) (PIN)	DYL1_HUMAN	SUBCELLULAR LOCATION: Cytoplasm, cytoskeleton. Nucleus. Mitochondrion. Note=Upon induction of apoptosis translocates together with BCL2L11 to mitochondria.	axon cytoplasm [GO:1904115]; centrosome [GO:0005813]; ciliary tip [GO:0097542]; cilium [GO:0005929]; cytoplasm [GO:0005737]; cytoplasmic dynein complex [GO:0005868]; cytosol [GO:0005829]; ficolin-1-rich granule membrane [GO:0101003]; kinetochore [GO:0000776]; membrane [GO:0016020]; microtubule [GO:0005874]; mitochondrion [GO:0005739]; mitotic spindle [GO:0072686]; nucleus [GO:0005634]; plasma mem…	GO:0000086; GO:0000776; GO:0003774; GO:0005634; GO:0005737; GO:0005739; GO:0005813; GO:0005829; GO:0005868; GO:0005874; GO:0005886; GO:0005929; GO:0006351; GO:0006355; GO:0006888; GO:0006915; GO:0007286; GO:0008092; GO:0010389; GO:0010970; GO:0016020; GO:0016032; GO:0016236; GO:0019886; GO:0019899; GO:0021762; GO:0030235; GO:0035735; GO:0035774; GO:0042326; GO:0042803; GO:0043312; GO:0045505; GO:…	DYNLL1	10,366	1893
CTR_vs_KIA0408	1.09749	0.255541	4.29478	3	0.0232153	0.0843917		1.63423	1.0737	1.09749	DYNLL2	Dynein light chain 2, cytoplasmic	FALSE	1.09749	Dynein light chain 2, cytoplasmic (8 kDa dynein light chain b) (DLC8b) (Dynein light chain LC8-type 2)	DYL2_HUMAN	SUBCELLULAR LOCATION: Cytoplasm, cytoskeleton {ECO:0000250}.	centrosome [GO:0005813]; ciliary tip [GO:0097542]; cilium [GO:0005929]; cytoplasmic dynein complex [GO:0005868]; cytosol [GO:0005829]; membrane [GO:0016020]; microtubule [GO:0005874]; myosin complex [GO:0016459]; myosin V complex [GO:0031475]; nucleus [GO:0005634]; plasma membrane [GO:0005886]; cytoskeletal protein binding [GO:0008092]; dynein intermediate chain binding [GO:0045505]; dynein light…	GO:0003774; GO:0005634; GO:0005813; GO:0005829; GO:0005868; GO:0005874; GO:0005886; GO:0005929; GO:0006888; GO:0008092; GO:0010970; GO:0016020; GO:0016236; GO:0016459; GO:0019886; GO:0031475; GO:0035735; GO:0042803; GO:0045505; GO:0046982; GO:0051959; GO:0060271; GO:0097110; GO:0097542; GO:2000582	DYNLL2	10,350	3963
CTR_vs_KIA0408	1.09406	0.292142	3.74496	3	0.033231	0.104048		1.47846	0.982768	1.09406	DYNLRB1	Dynein light chain roadblock-type 1	FALSE	1.09406	Dynein light chain roadblock-type 1 (Bithoraxoid-like protein) (BLP) (Dynein light chain 2A, cytoplasmic) (Dynein-associated protein Km23) (Roadblock domain-containing protein 1)	DLRB1_HUMAN	SUBCELLULAR LOCATION: Cytoplasm, cytoskeleton.	centrosome [GO:0005813]; ciliary tip [GO:0097542]; cilium [GO:0005929]; cytoplasm [GO:0005737]; cytoplasmic dynein complex [GO:0005868]; membrane [GO:0016020]; microtubule [GO:0005874]; outer dynein arm [GO:0036157]; dynein intermediate chain binding [GO:0045505]; microtubule motor activity [GO:0003777]; intraciliary transport involved in cilium assembly [GO:0035735]; microtubule-based movement […	GO:0003777; GO:0005737; GO:0005813; GO:0005868; GO:0005874; GO:0005929; GO:0007018; GO:0007632; GO:0016020; GO:0035735; GO:0036157; GO:0045505; GO:0097542	DYNLRB1	10,922	4764
CTR_vs_KIA0408	0.587707	0.18418	3.19094	3	0.0496754	0.129986		1.30386	0.886104	0.587707	DYNLT1	Dynein light chain Tctex-type 1	FALSE	0.587707	Dynein light chain Tctex-type 1 (Protein CW-1) (T-complex testis-specific protein 1 homolog)	DYLT1_HUMAN	SUBCELLULAR LOCATION: Golgi apparatus {ECO:0000250}. Cytoplasm {ECO:0000250}. Cytoplasm, cytoskeleton, spindle {ECO:0000250}. Note=Localizes to mitotic spindles. {ECO:0000250}.	cytoplasmic dynein complex [GO:0005868]; cytoplasmic microtubule [GO:0005881]; extracellular region [GO:0005576]; ficolin-1-rich granule lumen [GO:1904813]; Golgi apparatus [GO:0005794]; host cell [GO:0043657]; secretory granule lumen [GO:0034774]; secretory vesicle [GO:0099503]; spindle [GO:0005819]; identical protein binding [GO:0042802]; motor activity [GO:0003774]; cell division [GO:0051301];…	GO:0000132; GO:0003774; GO:0005576; GO:0005794; GO:0005819; GO:0005868; GO:0005881; GO:0008277; GO:0019060; GO:0034774; GO:0042802; GO:0043312; GO:0043657; GO:0046718; GO:0050768; GO:0051301; GO:0075521; GO:0099503; GO:1904813	DYNLT1	12,452	1894
CTR_vs_KIA0408	-0.52939	0.847596	-0.624579	3	0.576524	0.679561		0.239182	0.167771	0.52939	FAM161A	Protein FAM161A	FALSE	0.52939	Protein FAM161A	F161A_HUMAN	SUBCELLULAR LOCATION: Cytoplasm, cytoskeleton, cilium basal body {ECO:0000269|PubMed:22940612}. Cell projection, cilium {ECO:0000269|PubMed:22940612}. Note=Localized to the region between the outer and inner photoreceptor segments, corresponding to the photoreceptor connecting cilium.	astral microtubule [GO:0000235]; centrosome [GO:0005813]; ciliary basal body [GO:0036064]; mitotic spindle [GO:0072686]; mitotic spindle pole [GO:0097431]; photoreceptor connecting cilium [GO:0032391]; photoreceptor inner segment [GO:0001917]; spindle microtubule [GO:0005876]; identical protein binding [GO:0042802]; microtubule binding [GO:0008017]; cilium assembly [GO:0060271]; positive regulati…	GO:0000235; GO:0001917; GO:0005813; GO:0005876; GO:0007601; GO:0008017; GO:0032391; GO:0036064; GO:0042802; GO:0050896; GO:0060271; GO:0072686; GO:0097431; GO:1901985	FAM161A	76,752	2639
CTR_vs_KIA0408	-0.683669	0.283272	-2.41347	3	0.094722	0.194585		1.02355	0.71089	0.683669	GORASP2	Golgi reassembly-stacking protein 2	FALSE	0.683669	Golgi reassembly-stacking protein 2 (GRS2) (Golgi phosphoprotein 6) (GOLPH6) (Golgi reassembly-stacking protein of 55 kDa) (GRASP55) (p59)	GORS2_HUMAN	SUBCELLULAR LOCATION: Golgi apparatus membrane; Lipid-anchor. Membrane; Peripheral membrane protein. Membrane {ECO:0000305}; Lipid-anchor {ECO:0000305}.	Golgi apparatus [GO:0005794]; Golgi membrane [GO:0000139]; membrane [GO:0016020]; Golgi organization [GO:0007030]; organelle organization [GO:0006996]	GO:0000139; GO:0005794; GO:0006996; GO:0007030; GO:0016020	GORASP2	47,145	4659
CTR_vs_KIA0408	0.638168	0.356807	1.78855	3	0.171638	0.289328		0.765387	0.53861	0.638168	HAUS1	HAUS augmin-like complex subunit 1	FALSE	0.638168	HAUS augmin-like complex subunit 1 (Coiled-coil domain-containing protein 5) (Enhancer of invasion-cluster) (HEI-C)	HAUS1_HUMAN	SUBCELLULAR LOCATION: Cytoplasm {ECO:0000305}. Cytoplasm, cytoskeleton, microtubule organizing center, centrosome {ECO:0000269|PubMed:19369198, ECO:0000269|PubMed:19427217}. Cytoplasm, cytoskeleton, spindle {ECO:0000269|PubMed:15082789, ECO:0000269|PubMed:19369198, ECO:0000269|PubMed:19427217}. Cytoplasm, cytoskeleton, spindle pole {ECO:0000305|PubMed:19369198}. Note=Localizes with the spindle po…	centrosome [GO:0005813]; cytosol [GO:0005829]; HAUS complex [GO:0070652]; microtubule [GO:0005874]; spindle pole [GO:0000922]; cell division [GO:0051301]; centrosome cycle [GO:0007098]; ciliary basal body-plasma membrane docking [GO:0097711]; G2/M transition of mitotic cell cycle [GO:0000086]; regulation of G2/M transition of mitotic cell cycle [GO:0010389]; spindle assembly [GO:0051225]	GO:0000086; GO:0000922; GO:0005813; GO:0005829; GO:0005874; GO:0007098; GO:0010389; GO:0051225; GO:0051301; GO:0070652; GO:0097711	HAUS1	31,863	3905
CTR_vs_KIA0408	-0.028069	0.166933	-0.168146	3	0.877165	0.912647		0.0569185	0.0396971	0.028069	HAUS2	HAUS augmin-like complex subunit 2	FALSE	0.028069	HAUS augmin-like complex subunit 2 (Centrosomal protein of 27 kDa) (Cep27)	HAUS2_HUMAN	SUBCELLULAR LOCATION: Cytoplasm, cytoskeleton, microtubule organizing center, centrosome {ECO:0000269|PubMed:14654843, ECO:0000269|PubMed:19369198, ECO:0000269|PubMed:19427217}. Cytoplasm, cytoskeleton, spindle {ECO:0000269|PubMed:19369198, ECO:0000269|PubMed:19427217}. Note=Localizes to interphase centrosomes and to mitotic spindle microtubules. {ECO:0000269|PubMed:19369198, ECO:0000269|PubMed:1…	centrosome [GO:0005813]; cytosol [GO:0005829]; HAUS complex [GO:0070652]; spindle microtubule [GO:0005876]; cell division [GO:0051301]; centrosome cycle [GO:0007098]; ciliary basal body-plasma membrane docking [GO:0097711]; G2/M transition of mitotic cell cycle [GO:0000086]; regulation of G2/M transition of mitotic cell cycle [GO:0010389]; spindle assembly [GO:0051225]	GO:0000086; GO:0005813; GO:0005829; GO:0005876; GO:0007098; GO:0010389; GO:0051225; GO:0051301; GO:0070652; GO:0097711	HAUS2	26,933	4911
CTR_vs_KIA0408	-0.035712	0.116062	-0.307699	3	0.778437	0.840558		0.108777	0.0754324	0.035712	HAUS3	HAUS augmin-like complex subunit 3	FALSE	0.035712	HAUS augmin-like complex subunit 3	HAUS3_HUMAN	SUBCELLULAR LOCATION: Cytoplasm, cytoskeleton, microtubule organizing center, centrosome {ECO:0000269|PubMed:19427217}. Cytoplasm, cytoskeleton, spindle {ECO:0000269|PubMed:19427217}. Note=Localizes to interphase centrosomes and to mitotic spindle microtubules. {ECO:0000269|PubMed:19427217}.	centrosome [GO:0005813]; cytosol [GO:0005829]; HAUS complex [GO:0070652]; intercellular bridge [GO:0045171]; microtubule [GO:0005874]; microtubule cytoskeleton [GO:0015630]; mitochondrion [GO:0005739]; mitotic spindle [GO:0072686]; nucleoplasm [GO:0005654]; spindle [GO:0005819]; cell division [GO:0051301]; centrosome cycle [GO:0007098]; ciliary basal body-plasma membrane docking [GO:0097711]; G2/…	GO:0000086; GO:0005654; GO:0005739; GO:0005813; GO:0005819; GO:0005829; GO:0005874; GO:0007098; GO:0010389; GO:0015630; GO:0045171; GO:0051225; GO:0051301; GO:0070652; GO:0072686; GO:0097711	HAUS3	69,650	2883
CTR_vs_KIA0408	-0.0589584	0.26646	-0.221265	3	0.839091	0.886738		0.0761911	0.0522049	0.0589584	HAUS4	HAUS augmin-like complex subunit 4	FALSE	0.0589584	HAUS augmin-like complex subunit 4	HAUS4_HUMAN	SUBCELLULAR LOCATION: Cytoplasm, cytoskeleton, microtubule organizing center, centrosome {ECO:0000269|PubMed:19369198, ECO:0000269|PubMed:19427217}. Cytoplasm, cytoskeleton, spindle {ECO:0000269|PubMed:19369198, ECO:0000269|PubMed:19427217}. Note=Localizes to interphase centrosomes and to mitotic spindle microtubules. {ECO:0000269|PubMed:19369198, ECO:0000269|PubMed:19427217}.	centrosome [GO:0005813]; cytosol [GO:0005829]; HAUS complex [GO:0070652]; microtubule [GO:0005874]; spindle [GO:0005819]; cell division [GO:0051301]; centrosome cycle [GO:0007098]; ciliary basal body-plasma membrane docking [GO:0097711]; G2/M transition of mitotic cell cycle [GO:0000086]; regulation of G2/M transition of mitotic cell cycle [GO:0010389]; spindle assembly [GO:0051225]	GO:0000086; GO:0005813; GO:0005819; GO:0005829; GO:0005874; GO:0007098; GO:0010389; GO:0051225; GO:0051301; GO:0070652; GO:0097711	HAUS4	42,400	4607
CTR_vs_KIA0408	-0.0527838	0.143683	-0.367362	3	0.737735	0.809355		0.1321	0.0918608	0.0527838	HAUS5	HAUS augmin-like complex subunit 5	FALSE	0.0527838	HAUS augmin-like complex subunit 5	HAUS5_HUMAN	SUBCELLULAR LOCATION: Cytoplasm, cytoskeleton, microtubule organizing center, centrosome {ECO:0000269|PubMed:19369198, ECO:0000269|PubMed:19427217}. Cytoplasm, cytoskeleton, spindle {ECO:0000269|PubMed:19369198, ECO:0000269|PubMed:19427217}. Note=Localizes to interphase centrosomes and to mitotic spindle microtubules. {ECO:0000269|PubMed:19369198, ECO:0000269|PubMed:19427217}.	centrosome [GO:0005813]; cytosol [GO:0005829]; HAUS complex [GO:0070652]; microtubule [GO:0005874]; spindle [GO:0005819]; cell division [GO:0051301]; centrosome cycle [GO:0007098]; ciliary basal body-plasma membrane docking [GO:0097711]; G2/M transition of mitotic cell cycle [GO:0000086]; regulation of G2/M transition of mitotic cell cycle [GO:0010389]; spindle assembly [GO:0051225]	GO:0000086; GO:0005813; GO:0005819; GO:0005829; GO:0005874; GO:0007098; GO:0010389; GO:0051225; GO:0051301; GO:0070652; GO:0097711	HAUS5	71,682	601
CTR_vs_KIA0408	0.31465	0.0543453	5.78984	3	0.0102492	0.0553538		1.98931	1.25685	0.31465	HAUS6	HAUS augmin-like complex subunit 6	FALSE	0.31465	HAUS augmin-like complex subunit 6	HAUS6_HUMAN	SUBCELLULAR LOCATION: Cytoplasm, cytoskeleton {ECO:0000269|PubMed:18443220, ECO:0000269|PubMed:19029337}. Cytoplasm, cytoskeleton, spindle {ECO:0000269|PubMed:19029337, ECO:0000269|PubMed:19369198, ECO:0000269|PubMed:19427217}. Cytoplasm, cytoskeleton, microtubule organizing center, centrosome {ECO:0000269|PubMed:19369198, ECO:0000269|PubMed:19427217}. Note=Localizes to interphase centrosomes and…	centrosome [GO:0005813]; cytosol [GO:0005829]; HAUS complex [GO:0070652]; microtubule [GO:0005874]; microtubule organizing center [GO:0005815]; nuclear speck [GO:0016607]; spindle [GO:0005819]; cell division [GO:0051301]; centrosome cycle [GO:0007098]; ciliary basal body-plasma membrane docking [GO:0097711]; G2/M transition of mitotic cell cycle [GO:0000086]; regulation of G2/M transition of mito…	GO:0000086; GO:0005813; GO:0005815; GO:0005819; GO:0005829; GO:0005874; GO:0007098; GO:0010389; GO:0016607; GO:0051225; GO:0051301; GO:0070652; GO:0097711	HAUS6	108,621	3147
CTR_vs_KIA0408	-1.22463	0.445044	-2.75172	3	0.0706406	0.162192		1.15095	0.789972	1.22463	HAUS7	HAUS augmin-like complex subunit 7	FALSE	1.22463	HAUS augmin-like complex subunit 7 (26S proteasome-associated UCH37-interacting protein 1) (UCHL5-interacting protein) (X-linked protein STS1769)	HAUS7_HUMAN	SUBCELLULAR LOCATION: Cytoplasm, cytoskeleton, microtubule organizing center, centrosome {ECO:0000269|PubMed:19369198, ECO:0000269|PubMed:19427217}. Cytoplasm, cytoskeleton, spindle {ECO:0000269|PubMed:19369198, ECO:0000269|PubMed:19427217}. Note=Localizes to interphase centrosomes and to mitotic spindle microtubules. {ECO:0000269|PubMed:19369198, ECO:0000269|PubMed:19427217}.	centrosome [GO:0005813]; cytosol [GO:0005829]; HAUS complex [GO:0070652]; microtubule [GO:0005874]; spindle [GO:0005819]; thioesterase binding [GO:0031996]; cell division [GO:0051301]; centrosome cycle [GO:0007098]; ciliary basal body-plasma membrane docking [GO:0097711]; G2/M transition of mitotic cell cycle [GO:0000086]; regulation of G2/M transition of mitotic cell cycle [GO:0010389]; spindle …	GO:0000086; GO:0005813; GO:0005819; GO:0005829; GO:0005874; GO:0007098; GO:0010389; GO:0031996; GO:0051225; GO:0051301; GO:0070652; GO:0097711	HAUS7	40,778	4224
CTR_vs_KIA0408	-0.726729	0.458478	-1.58509	3	0.211123	0.33008		0.675464	0.481381	0.726729	HAUS8	HAUS augmin-like complex subunit 8	FALSE	0.726729	HAUS augmin-like complex subunit 8 (HEC1/NDC80-interacting centrosome-associated protein 1) (Sarcoma antigen NY-SAR-48)	HAUS8_HUMAN	SUBCELLULAR LOCATION: Cytoplasm {ECO:0000305}. Cytoplasm, cytoskeleton, microtubule organizing center, centrosome {ECO:0000269|PubMed:19369198, ECO:0000269|PubMed:19427217}. Cytoplasm, cytoskeleton, spindle {ECO:0000269|PubMed:19369198, ECO:0000269|PubMed:19427217}. Cytoplasm, cytoskeleton, spindle pole {ECO:0000305|PubMed:19369198}. Note=During interphase, primarily cytoplasmic and associates wi…	centrosome [GO:0005813]; cytosol [GO:0005829]; HAUS complex [GO:0070652]; microtubule [GO:0005874]; spindle pole [GO:0000922]; cell division [GO:0051301]; centrosome cycle [GO:0007098]; ciliary basal body-plasma membrane docking [GO:0097711]; G2/M transition of mitotic cell cycle [GO:0000086]; regulation of G2/M transition of mitotic cell cycle [GO:0010389]; spindle assembly [GO:0051225]	GO:0000086; GO:0000922; GO:0005813; GO:0005829; GO:0005874; GO:0007098; GO:0010389; GO:0051225; GO:0051301; GO:0070652; GO:0097711	HAUS8	44,857	4301
CTR_vs_KIA0408	-1.05691	0.316878	-3.3354	3	0.0445398	0.122997		1.35125	0.910105	1.05691	HDAC6	Histone deacetylase 6	FALSE	1.05691	Histone deacetylase 6 (HD6) (EC 3.5.1.98)	HDAC6_HUMAN	SUBCELLULAR LOCATION: Nucleus. Cytoplasm. Perikaryon {ECO:0000250}. Cell projection, dendrite {ECO:0000250}. Cell projection, axon {ECO:0000250}. Note=It is mainly cytoplasmic, where it is associated with microtubules.	aggresome [GO:0016235]; axon [GO:0030424]; caveola [GO:0005901]; cell leading edge [GO:0031252]; cytoplasm [GO:0005737]; cytoplasmic microtubule [GO:0005881]; cytosol [GO:0005829]; dendrite [GO:0030425]; histone deacetylase complex [GO:0000118]; inclusion body [GO:0016234]; microtubule [GO:0005874]; microtubule associated complex [GO:0005875]; multivesicular body [GO:0005771]; nucleoplasm [GO:000…	GO:0000118; GO:0000209; GO:0001047; GO:0003779; GO:0004407; GO:0005634; GO:0005654; GO:0005737; GO:0005771; GO:0005829; GO:0005874; GO:0005875; GO:0005881; GO:0005901; GO:0006351; GO:0006476; GO:0006515; GO:0006886; GO:0006914; GO:0007026; GO:0008013; GO:0008017; GO:0008270; GO:0009636; GO:0009967; GO:0010033; GO:0010469; GO:0010506; GO:0010634; GO:0010727; GO:0010870; GO:0016234; GO:0016235; GO:…	HDAC6	131,419	5116
CTR_vs_KIA0408	0.0286857	0.190902	0.150264	3	0.890091	0.922651		0.0505657	0.0349625	0.0286857	HOOK3	Protein Hook homolog 3	FALSE	0.0286857	Protein Hook homolog 3 (h-hook3) (hHK3)	HOOK3_HUMAN	SUBCELLULAR LOCATION: Cytoplasm, cytoskeleton {ECO:0000269|PubMed:11238449}. Golgi apparatus {ECO:0000269|PubMed:11238449}. Note=Enriched at the cis-face of the Golgi complex. Localizes to microtubule asters in prophase (PubMed:11238449). Localizes to the manchette in elongating spermatids (By similarity). {ECO:0000250|UniProtKB:Q8BUK6, ECO:0000269|PubMed:11238449}.	centriolar satellite [GO:0034451]; centrosome [GO:0005813]; cis-Golgi network [GO:0005801]; cytosol [GO:0005829]; FHF complex [GO:0070695]; microtubule [GO:0005874]; pericentriolar material [GO:0000242]; dynactin binding [GO:0034452]; dynein intermediate chain binding [GO:0045505]; dynein light chain binding [GO:0045503]; dynein light intermediate chain binding [GO:0051959]; identical protein bin…	GO:0000242; GO:0005801; GO:0005813; GO:0005829; GO:0005874; GO:0007032; GO:0007040; GO:0008017; GO:0008333; GO:0015031; GO:0022027; GO:0030705; GO:0031122; GO:0034451; GO:0034452; GO:0034454; GO:0042802; GO:0045022; GO:0045503; GO:0045505; GO:0050768; GO:0051645; GO:0051959; GO:0070695; GO:0071539; GO:0097150	HOOK3	83,126	3233
CTR_vs_KIA0408	-0.125762	0.212635	-0.591447	3	0.595829	0.694046		0.224879	0.158612	0.125762	IFT122	Intraflagellar transport protein 122 homolog	FALSE	0.125762	Intraflagellar transport protein 122 homolog (WD repeat-containing protein 10) (WD repeat-containing protein 140)	IF122_HUMAN	SUBCELLULAR LOCATION: Cytoplasm. Cell projection, cilium {ECO:0000250}. Cytoplasm, cytoskeleton, cilium basal body {ECO:0000250}. Note=Localizes to photoreceptor connecting cilia. {ECO:0000250}.	ciliary basal body [GO:0036064]; ciliary base [GO:0097546]; ciliary tip [GO:0097542]; cilium [GO:0005929]; cytosol [GO:0005829]; intraciliary transport particle A [GO:0030991]; membrane [GO:0016020]; nucleoplasm [GO:0005654]; photoreceptor connecting cilium [GO:0032391]; camera-type eye morphogenesis [GO:0048593]; ciliary receptor clustering involved in smoothened signaling pathway [GO:0060830]; …	GO:0001843; GO:0005654; GO:0005829; GO:0005929; GO:0007227; GO:0010172; GO:0016020; GO:0021914; GO:0030991; GO:0032391; GO:0035050; GO:0035115; GO:0035720; GO:0035721; GO:0035735; GO:0036064; GO:0042733; GO:0045879; GO:0048593; GO:0050680; GO:0060173; GO:0060271; GO:0060830; GO:0060831; GO:0060971; GO:0061512; GO:0072594; GO:0097542; GO:0097546; GO:1905515	IFT122	141,825	4710
CTR_vs_KIA0408	-0.352731	0.216851	-1.6266	3	0.202297	0.321611		0.69401	0.492669	0.352731	IFT140	Intraflagellar transport protein 140 homolog	FALSE	0.352731	Intraflagellar transport protein 140 homolog (WD and tetratricopeptide repeats protein 2)	IF140_HUMAN	SUBCELLULAR LOCATION: Cytoplasm, cytoskeleton, cilium basal body. Cytoplasm, cytoskeleton, microtubule organizing center, centrosome. Cell projection, cilium {ECO:0000250|UniProtKB:E9PY46}.	axoneme [GO:0005930]; centrosome [GO:0005813]; ciliary basal body [GO:0036064]; ciliary tip [GO:0097542]; cilium [GO:0005929]; intraciliary transport particle A [GO:0030991]; photoreceptor connecting cilium [GO:0032391]; photoreceptor outer segment [GO:0001750]; determination of left/right symmetry [GO:0007368]; embryonic brain development [GO:1990403]; embryonic camera-type eye development [GO:0…	GO:0001750; GO:0005813; GO:0005929; GO:0005930; GO:0007368; GO:0007507; GO:0008589; GO:0021532; GO:0030991; GO:0031076; GO:0032391; GO:0035721; GO:0035735; GO:0035845; GO:0036064; GO:0042733; GO:0048701; GO:0048705; GO:0060041; GO:0061512; GO:0072001; GO:0097542; GO:1902017; GO:1905515; GO:1990403	IFT140	165,193	4134
CTR_vs_KIA0408	1.07994	0.131812	8.19303	3	0.00380472	0.0351256		2.41968	1.45438	1.07994	IFT172	Intraflagellar transport protein 172 homolog	FALSE	1.07994	Intraflagellar transport protein 172 homolog	IF172_HUMAN	SUBCELLULAR LOCATION: Cell projection, cilium {ECO:0000269|PubMed:24140113}. Note=Localized to the axoneme and around the base of the cilium.	axoneme [GO:0005930]; ciliary basal body [GO:0036064]; ciliary tip [GO:0097542]; cilium [GO:0005929]; extracellular vesicle [GO:1903561]; intraciliary transport particle B [GO:0030992]; sperm cytoplasmic droplet [GO:0097598]; sperm midpiece [GO:0097225]; sperm principal piece [GO:0097228]; bone development [GO:0060348]; brain development [GO:0007420]; cilium assembly [GO:0060271]; cytoplasmic mic…	GO:0001843; GO:0001947; GO:0005929; GO:0005930; GO:0007219; GO:0007224; GO:0007420; GO:0008544; GO:0009953; GO:0016485; GO:0021522; GO:0030992; GO:0031122; GO:0035735; GO:0036064; GO:0045880; GO:0050680; GO:0060021; GO:0060173; GO:0060271; GO:0060348; GO:0061525; GO:0070986; GO:0097225; GO:0097228; GO:0097542; GO:0097598; GO:1903561; GO:1905515	IFT172	197,576	5153
CTR_vs_KIA0408	1.07988	0.171347	6.30231	3	0.00807134	0.0487758		2.09305	1.3118	1.07988	IFT20	Intraflagellar transport protein 20 homolog	FALSE	1.07988	Intraflagellar transport protein 20 homolog (hIFT20)	IFT20_HUMAN	SUBCELLULAR LOCATION: Golgi apparatus, cis-Golgi network {ECO:0000250|UniProtKB:Q61025}. Cytoplasm, cytoskeleton, microtubule organizing center, centrosome, centriole {ECO:0000250|UniProtKB:Q61025}. Cytoplasm, cytoskeleton, cilium basal body {ECO:0000250|UniProtKB:Q61025}. Cell projection, cilium {ECO:0000250|UniProtKB:Q61025}. Note=Present at the centrosomes during the cell cycle and associated …	centriole [GO:0005814]; centrosome [GO:0005813]; ciliary base [GO:0097546]; ciliary tip [GO:0097542]; cilium [GO:0005929]; cis-Golgi network [GO:0005801]; dendrite terminus [GO:0044292]; Golgi membrane [GO:0000139]; intraciliary transport particle B [GO:0030992]; kinociliary basal body [GO:1902636]; microvillus [GO:0005902]; motile cilium [GO:0031514]; photoreceptor connecting cilium [GO:0032391]…	GO:0000139; GO:0001736; GO:0001750; GO:0001822; GO:0002046; GO:0005801; GO:0005813; GO:0005814; GO:0005902; GO:0005929; GO:0007224; GO:0008542; GO:0017137; GO:0030992; GO:0031514; GO:0032391; GO:0032420; GO:0034067; GO:0035735; GO:0035845; GO:0036372; GO:0044292; GO:0051642; GO:0055007; GO:0060122; GO:0060271; GO:0060828; GO:0061351; GO:0061512; GO:0072659; GO:0090102; GO:0097542; GO:0097546; GO:…	IFT20	15,281	3348
CTR_vs_KIA0408	0.540724	0.178393	3.03108	3	0.0562627	0.140259		1.24978	0.85307	0.540724	IFT22	Intraflagellar transport protein 22 homolog	FALSE	0.540724	Intraflagellar transport protein 22 homolog (Rab-like protein 5)	IFT22_HUMAN	SUBCELLULAR LOCATION: Cell projection, cilium {ECO:0000250}.	centrosome [GO:0005813]; ciliary tip [GO:0097542]; cilium [GO:0005929]; intraciliary transport particle B [GO:0030992]; GTP binding [GO:0005525]; intraciliary transport involved in cilium assembly [GO:0035735]	GO:0005525; GO:0005813; GO:0005929; GO:0030992; GO:0035735; GO:0097542	IFT22	20,835	4640
CTR_vs_KIA0408	-0.392244	0.275393	-1.42431	3	0.24956	0.371212		0.602825	0.430379	0.392244	IFT27	Intraflagellar transport protein 27 homolog	FALSE	0.392244	Intraflagellar transport protein 27 homolog (Putative GTP-binding protein RAY-like) (Rab-like protein 4)	IFT27_HUMAN	SUBCELLULAR LOCATION: Cell projection, cilium {ECO:0000269|PubMed:25443296}.	centrosome [GO:0005813]; ciliary tip [GO:0097542]; cilium [GO:0005929]; endosome [GO:0005768]; Golgi apparatus [GO:0005794]; intraciliary transport particle B [GO:0030992]; motile cilium [GO:0031514]; sperm midpiece [GO:0097225]; sperm principal piece [GO:0097228]; GTP binding [GO:0005525]; GTPase activity [GO:0003924]; cochlea development [GO:0090102]; inner ear receptor cell stereocilium organi…	GO:0003924; GO:0005525; GO:0005768; GO:0005794; GO:0005813; GO:0005929; GO:0006886; GO:0007224; GO:0030992; GO:0031514; GO:0035735; GO:0042073; GO:0060122; GO:0090102; GO:0097225; GO:0097228; GO:0097542	IFT27	20,480	4368
CTR_vs_KIA0408	0.138865	0.419052	0.33138	3	0.762156	0.8265		0.117956	0.0827574	0.138865	IFT46	Intraflagellar transport protein 46 homolog	FALSE	0.138865	Intraflagellar transport protein 46 homolog	IFT46_HUMAN	SUBCELLULAR LOCATION: Cytoplasm, cytoskeleton, cilium basal body {ECO:0000250}. Cell projection, cilium {ECO:0000250}. Note=Expression is concentrated at the cilium basal body but is also detected along the length of the cilium. {ECO:0000250}.	centrosome [GO:0005813]; ciliary tip [GO:0097542]; cilium [GO:0005929]; cytoplasm [GO:0005737]; intraciliary transport particle B [GO:0030992]; motile cilium [GO:0031514]; protein C-terminus binding [GO:0008022]; cilium assembly [GO:0060271]; intraciliary transport [GO:0042073]; intraciliary transport involved in cilium assembly [GO:0035735]; protein stabilization [GO:0050821]; smoothened signali…	GO:0005737; GO:0005813; GO:0005929; GO:0007224; GO:0008022; GO:0030992; GO:0031514; GO:0035735; GO:0042073; GO:0050821; GO:0060271; GO:0097542	IFT46	34,286	4790
CTR_vs_KIA0408	0.853853	0.0657816	12.9801	3	0.000987262	0.0194656		3.00557	1.71073	0.853853	IFT74	Intraflagellar transport protein 74 homolog	FALSE	0.853853	Intraflagellar transport protein 74 homolog (Capillary morphogenesis gene 1 protein) (CMG-1) (Coiled-coil domain-containing protein 2)	IFT74_HUMAN	SUBCELLULAR LOCATION: Cell projection, cilium. Cytoplasmic vesicle. Note=Localizes along primary cilia at interphase and around the basal body/centriole at interphase and mitosis.	centrosome [GO:0005813]; ciliary tip [GO:0097542]; cilium [GO:0005929]; cytoplasmic vesicle [GO:0031410]; intraciliary transport particle B [GO:0030992]; motile cilium [GO:0031514]; nucleus [GO:0005634]; beta-tubulin binding [GO:0048487]; chromatin binding [GO:0003682]; cilium assembly [GO:0060271]; determination of left/right symmetry [GO:0007368]; heart development [GO:0007507]; intraciliary tr…	GO:0003334; GO:0003682; GO:0005634; GO:0005813; GO:0005929; GO:0007219; GO:0007368; GO:0007507; GO:0030992; GO:0031410; GO:0031514; GO:0033630; GO:0035735; GO:0045944; GO:0048487; GO:0050680; GO:0060271; GO:0097542; GO:1905515	IFT74	69,239	4054
CTR_vs_KIA0408	-0.10357	0.0628009	-1.64918	3	0.197672	0.317001		0.704054	0.498939	0.10357	IFT80	Intraflagellar transport protein 80 homolog	FALSE	0.10357	Intraflagellar transport protein 80 homolog (WD repeat-containing protein 56)	IFT80_HUMAN	SUBCELLULAR LOCATION: Cytoplasm. Cytoplasm, cytoskeleton, cilium basal body {ECO:0000250}. Cytoplasm, cytoskeleton, cilium axoneme {ECO:0000250}. Note=Basal body and ciliary axoneme. {ECO:0000250}.	centrosome [GO:0005813]; ciliary tip [GO:0097542]; cilium [GO:0005929]; cytoplasm [GO:0005737]; intraciliary transport particle B [GO:0030992]; cilium assembly [GO:0060271]; intraciliary transport involved in cilium assembly [GO:0035735]	GO:0005737; GO:0005813; GO:0005929; GO:0030992; GO:0035735; GO:0060271; GO:0097542	IFT80	88,035	5078
CTR_vs_KIA0408	0.962522	0.195659	4.91939	3	0.0160927	0.0688889		1.79337	1.16185	0.962522	IFT81	Intraflagellar transport protein 81 homolog	FALSE	0.962522	Intraflagellar transport protein 81 homolog (Carnitine deficiency-associated protein expressed in ventricle 1) (CDV-1)	IFT81_HUMAN	SUBCELLULAR LOCATION: Cell projection, cilium {ECO:0000305|PubMed:23990561}.	centrosome [GO:0005813]; ciliary basal body [GO:0036064]; ciliary tip [GO:0097542]; cilium [GO:0005929]; intraciliary transport particle B [GO:0030992]; motile cilium [GO:0031514]; sperm midpiece [GO:0097225]; sperm principal piece [GO:0097228]; tubulin binding [GO:0015631]; cilium assembly [GO:0060271]; intraciliary transport involved in cilium assembly [GO:0035735]; spermatogenesis [GO:0007283]	GO:0005813; GO:0005929; GO:0007283; GO:0015631; GO:0030992; GO:0031514; GO:0035735; GO:0036064; GO:0060271; GO:0097225; GO:0097228; GO:0097542	IFT81	79,746	3729
CTR_vs_KIA0408	-0.766507	0.158442	-4.83776	3	0.0168447	0.0706227		1.77354	1.15106	0.766507	JADE1	Protein Jade-1	FALSE	0.766507	Protein Jade-1 (Jade family PHD finger protein 1) (PHD finger protein 17)	JADE1_HUMAN	SUBCELLULAR LOCATION: Cytoplasm {ECO:0000269|PubMed:12169691, ECO:0000269|PubMed:15502158}. Nucleus {ECO:0000269|PubMed:15502158, ECO:0000269|PubMed:22654112}. Cytoplasm, cytoskeleton, cilium basal body {ECO:0000269|PubMed:22654112}. Note=Localizes to the ciliary transition zone. {ECO:0000269|PubMed:22654112}.	ciliary basal body [GO:0036064]; cytoplasm [GO:0005737]; cytosol [GO:0005829]; histone acetyltransferase complex [GO:0000123]; nuclear speck [GO:0016607]; nucleoplasm [GO:0005654]; nucleus [GO:0005634]; plasma membrane [GO:0005886]; metal ion binding [GO:0046872]; RNA polymerase II transcription coactivator activity [GO:0001105]; apoptotic process [GO:0006915]; histone H3 acetylation [GO:0043966]…	GO:0000123; GO:0001105; GO:0005634; GO:0005654; GO:0005737; GO:0005829; GO:0005886; GO:0006915; GO:0016607; GO:0030308; GO:0036064; GO:0043966; GO:0043981; GO:0043982; GO:0043983; GO:0046872; GO:0090090; GO:2000134	JADE1	95,533	2911
CTR_vs_KIA0408	9.47496	0.153901	61.5654	3	9.44164e-06	0.0107734		5.02495	1.96765	9.47496	KIAA0408	Uncharacterized protein KIAA0408	FALSE	9.47496	Uncharacterized protein KIAA0408	K0408_HUMAN				KIAA0408	79,163	3047
CTR_vs_KIA0408	3.52334	0.157679	22.345	3	0.00019625	0.0111783		3.70719	1.95162	3.52334	KIAA0754	Uncharacterized protein KIAA0754	FALSE	3.52334	Uncharacterized protein KIAA0754	K0754_HUMAN				KIAA0754	135,148	585
CTR_vs_KIA0408	1.47828	0.196365	7.52825	3	0.00485811	0.039304		2.31353	1.40556	1.47828	KIAA0930	Uncharacterized protein KIAA0930	FALSE	1.47828	Uncharacterized protein KIAA0930	K0930_HUMAN				KIAA0930	45,794	2910
CTR_vs_KIA0408	-2.49344	0.102688	-24.2817	3	0.000153105	0.0109601		3.81501	1.96019	2.49344	KIAA1143	Uncharacterized protein KIAA1143	FALSE	2.49344	Uncharacterized protein KIAA1143	K1143_HUMAN				KIAA1143	17,465	3869
CTR_vs_KIA0408	3.66442	0.158796	23.0762	3	0.000178257	0.0110246		3.74895	1.95764	3.66442	KIAA1549	UPF0606 protein KIAA1549	FALSE	3.66442	UPF0606 protein KIAA1549	K1549_HUMAN	SUBCELLULAR LOCATION: Membrane {ECO:0000305}; Multi-pass membrane protein {ECO:0000305}.	integral component of membrane [GO:0016021]; plasma membrane [GO:0005886]; RNA polymerase II transcription factor activity, sequence-specific DNA binding [GO:0000981]	GO:0000981; GO:0005886; GO:0016021	KIAA1549	210,755	4739
CTR_vs_KIA0408	-0.261875	0.107652	-2.43262	3	0.0931121	0.192541		1.03099	0.715477	0.261875	KIF13A	Kinesin-like protein KIF13A	FALSE	0.261875	Kinesin-like protein KIF13A (Kinesin-like protein RBKIN)	KI13A_HUMAN	SUBCELLULAR LOCATION: Cytoplasm, cytoskeleton, microtubule organizing center, centrosome. Midbody. Endosome membrane. Golgi apparatus membrane {ECO:0000250}. Note=Recruited to the midbody during cytokinesis.	centrosome [GO:0005813]; endosome membrane [GO:0010008]; kinesin complex [GO:0005871]; microtubule [GO:0005874]; midbody [GO:0030496]; trans-Golgi network membrane [GO:0032588]; ATP binding [GO:0005524]; ATPase activity [GO:0016887]; microtubule binding [GO:0008017]; microtubule motor activity [GO:0003777]; cargo loading into vesicle [GO:0035459]; cell cycle [GO:0007049]; cell division [GO:005130…	GO:0003777; GO:0005524; GO:0005813; GO:0005871; GO:0005874; GO:0006886; GO:0007018; GO:0007049; GO:0008017; GO:0008333; GO:0010008; GO:0016887; GO:0030496; GO:0030705; GO:0032438; GO:0032465; GO:0032588; GO:0035459; GO:0043001; GO:0051301; GO:0072383	KIF13A	202,308	4532
CTR_vs_KIA0408	1.08212	0.518085	2.08869	3	0.127937	0.236692		0.893004	0.625817	1.08212	KIF26B	Kinesin-like protein KIF26B	FALSE	1.08212	Kinesin-like protein KIF26B	KI26B_HUMAN	SUBCELLULAR LOCATION: Cytoplasm {ECO:0000250}. Cytoplasm, cytoskeleton {ECO:0000305}.	cytoplasm [GO:0005737]; kinesin complex [GO:0005871]; microtubule [GO:0005874]; ATP binding [GO:0005524]; microtubule binding [GO:0008017]; microtubule motor activity [GO:0003777]; establishment of cell polarity [GO:0030010]; positive regulation of cell-cell adhesion [GO:0022409]; ureteric bud invasion [GO:0072092]	GO:0003777; GO:0005524; GO:0005737; GO:0005871; GO:0005874; GO:0008017; GO:0022409; GO:0030010; GO:0072092	KIF26B	223,883	2613
CTR_vs_KIA0408	0.1129	0.0910166	1.24043	3	0.302986	0.427043		0.518577	0.369528	0.1129	KIF2A	Kinesin-like protein KIF2A	FALSE	0.1129	Kinesin-like protein KIF2A (Kinesin-2) (hK2)	KIF2A_HUMAN	SUBCELLULAR LOCATION: Cytoplasm {ECO:0000250}. Cytoplasm, cytoskeleton, microtubule organizing center, centrosome. Cytoplasm, cytoskeleton, spindle pole. Cytoplasm, cytoskeleton, spindle. Note=Localized to the spindle microtubules and spindle poles from prophase to metaphase. Efficient targeting to spindle microtubules and spindle poles requires the kinase activity of PLK1. Recruited to mitotic s…	centriolar subdistal appendage [GO:0120103]; centriole [GO:0005814]; centrosome [GO:0005813]; cytoplasm [GO:0005737]; cytosol [GO:0005829]; kinesin complex [GO:0005871]; membrane [GO:0016020]; microtubule [GO:0005874]; nuclear body [GO:0016604]; nucleolus [GO:0005730]; nucleus [GO:0005634]; sperm principal piece [GO:0097228]; spindle pole [GO:0000922]; ATP binding [GO:0005524]; ATPase activity [G…	GO:0000226; GO:0000922; GO:0003774; GO:0003777; GO:0005524; GO:0005634; GO:0005730; GO:0005737; GO:0005813; GO:0005814; GO:0005829; GO:0005871; GO:0005874; GO:0006890; GO:0007018; GO:0007019; GO:0007052; GO:0007399; GO:0008017; GO:0016020; GO:0016604; GO:0016887; GO:0019886; GO:0030154; GO:0030334; GO:0051301; GO:0090307; GO:0097228; GO:0120103	KIF2A	79,955	56
CTR_vs_KIA0408	-0.0751653	0.256118	-0.293479	3	0.788288	0.84815		0.103315	0.0715274	0.0751653	KIF3A	Kinesin-like protein KIF3A	FALSE	0.0751653	Kinesin-like protein KIF3A (Microtubule plus end-directed kinesin motor 3A)	KIF3A_HUMAN	SUBCELLULAR LOCATION: Cytoplasm, cytoskeleton {ECO:0000305}. Cell projection, cilium {ECO:0000250|UniProtKB:P28741}. Cytoplasm, cytoskeleton, microtubule organizing center, centrosome, centriole {ECO:0000269|PubMed:23386061}. Note=Localizes to the subdistal appendage region of the centriole. {ECO:0000269|PubMed:23386061}.	centriole [GO:0005814]; centrosome [GO:0005813]; ciliary tip [GO:0097542]; cilium [GO:0005929]; cytosol [GO:0005829]; extracellular exosome [GO:0070062]; kinesin II complex [GO:0016939]; microtubule [GO:0005874]; microtubule cytoskeleton [GO:0015630]; ATP binding [GO:0005524]; ATP-dependent microtubule motor activity, plus-end-directed [GO:0008574]; microtubule binding [GO:0008017]; Rab GTPase bi…	GO:0005524; GO:0005813; GO:0005814; GO:0005829; GO:0005874; GO:0005929; GO:0006890; GO:0006996; GO:0007018; GO:0008017; GO:0008574; GO:0010457; GO:0015630; GO:0016939; GO:0017137; GO:0019886; GO:0022008; GO:0030507; GO:0034454; GO:0035735; GO:0060271; GO:0070062; GO:0072383; GO:0097542	KIF3A	80,041	5511
CTR_vs_KIA0408	0.335827	0.639531	0.525115	3	0.63584	0.729501		0.196652	0.136974	0.335827	LRRCC1	Leucine-rich repeat and coiled-coil domain-containing protein 1	FALSE	0.335827	Leucine-rich repeat and coiled-coil domain-containing protein 1 (Centrosomal leucine-rich repeat and coiled-coil domain-containing protein)	LRCC1_HUMAN	SUBCELLULAR LOCATION: Cytoplasm, cytoskeleton, microtubule organizing center, centrosome, centriole {ECO:0000269|PubMed:18728398}. Note=Associates with the centrosome throughout the cell cycle and extensively accumulates during the mitotic phase.	centriole [GO:0005814]; centrosome [GO:0005813]; cell cycle [GO:0007049]; cell division [GO:0051301]	GO:0005813; GO:0005814; GO:0007049; GO:0051301	LRRCC1	119,596	4457
CTR_vs_KIA0408	-0.25056	0.939499	-0.266695	3	0.806985	0.861978		0.0931346	0.0645037	0.25056	MECP2	Methyl-CpG-binding protein 2	FALSE	0.25056	Methyl-CpG-binding protein 2 (MeCp-2 protein) (MeCp2)	MECP2_HUMAN	SUBCELLULAR LOCATION: Nucleus {ECO:0000250|UniProtKB:Q9Z2D6}. Note=Colocalized with methyl-CpG in the genome. Colocalized with TBL1X to the heterochromatin foci. {ECO:0000269|PubMed:28348241}.	cytosol [GO:0005829]; extracellular space [GO:0005615]; heterochromatin [GO:0000792]; mitochondrion [GO:0005739]; nucleus [GO:0005634]; postsynapse [GO:0098794]; chromatin binding [GO:0003682]; DNA binding [GO:0003677]; double-stranded methylated DNA binding [GO:0010385]; methyl-CpG binding [GO:0008327]; mRNA binding [GO:0003729]; protein domain specific binding [GO:0019904]; protein N-terminus b…	GO:0000122; GO:0000792; GO:0001078; GO:0001662; GO:0001666; GO:0001964; GO:0001976; GO:0002087; GO:0003677; GO:0003682; GO:0003714; GO:0003723; GO:0003729; GO:0005615; GO:0005634; GO:0005739; GO:0005829; GO:0006020; GO:0006122; GO:0006342; GO:0006349; GO:0006351; GO:0006541; GO:0006576; GO:0007052; GO:0007416; GO:0007585; GO:0007616; GO:0007626; GO:0008104; GO:0008134; GO:0008211; GO:0008284; GO:…	MECP2	52,441	1620
CTR_vs_KIA0408	0.864438	0.168723	5.1234	3	0.0143954	0.0645253		1.84178	1.19027	0.864438	NDE1	Nuclear distribution protein nudE homolog 1	FALSE	0.864438	Nuclear distribution protein nudE homolog 1 (NudE)	NDE1_HUMAN	SUBCELLULAR LOCATION: Cytoplasm, cytoskeleton. Cytoplasm, cytoskeleton, microtubule organizing center, centrosome. Chromosome, centromere, kinetochore. Cytoplasm, cytoskeleton, spindle. Cleavage furrow. Note=Localizes to the interphase and S phase centrosome. During mitosis, partially associated with the mitotic spindle. Concentrates at the plus ends of microtubules coincident with kinetochores i…	centrosome [GO:0005813]; cleavage furrow [GO:0032154]; condensed chromosome kinetochore [GO:0000777]; cytosol [GO:0005829]; kinesin complex [GO:0005871]; kinetochore [GO:0000776]; membrane [GO:0016020]; microtubule [GO:0005874]; spindle pole centrosome [GO:0031616]; synapse [GO:0045202]; identical protein binding [GO:0042802]; microtubule binding [GO:0008017]; protein domain specific binding [GO:…	GO:0000086; GO:0000132; GO:0000776; GO:0000777; GO:0001764; GO:0005813; GO:0005829; GO:0005871; GO:0005874; GO:0007020; GO:0007059; GO:0007100; GO:0007405; GO:0008017; GO:0010389; GO:0016020; GO:0016477; GO:0019904; GO:0021987; GO:0031616; GO:0032154; GO:0042802; GO:0045202; GO:0047496; GO:0051298; GO:0051301; GO:0051303; GO:0051642; GO:0097711; GO:2000574	NDE1	37,721	4960
CTR_vs_KIA0408	0.567963	0.0951968	5.96619	3	0.0094213	0.0527051		2.02589	1.27815	0.567963	NDEL1	Nuclear distribution protein nudE-like 1	FALSE	0.567963	Nuclear distribution protein nudE-like 1 (Protein Nudel) (Mitosin-associated protein 1)	NDEL1_HUMAN	SUBCELLULAR LOCATION: Cytoplasm, cytoskeleton. Cytoplasm, cytoskeleton, microtubule organizing center, centrosome. Chromosome, centromere, kinetochore. Cytoplasm, cytoskeleton, spindle. Note=Localizes to the cell body of the motor neurons and colocalizes with assembled neurofilaments within axonal processes. Localizes to the microtubules of the manchette in elongated spermatids. Colocalizes with …	axon cytoplasm [GO:1904115]; axon hillock [GO:0043203]; cell leading edge [GO:0031252]; central region of growth cone [GO:0090724]; centrosome [GO:0005813]; condensed chromosome kinetochore [GO:0000777]; cytosol [GO:0005829]; kinesin complex [GO:0005871]; kinetochore [GO:0000776]; microtubule [GO:0005874]; neurofilament cytoskeleton [GO:0060053]; nuclear envelope [GO:0005635]; spindle [GO:0005819…	GO:0000132; GO:0000776; GO:0000777; GO:0001764; GO:0001833; GO:0005635; GO:0005813; GO:0005819; GO:0005829; GO:0005871; GO:0005874; GO:0007020; GO:0007059; GO:0007100; GO:0008017; GO:0008021; GO:0008090; GO:0008286; GO:0010975; GO:0016477; GO:0021799; GO:0021955; GO:0031252; GO:0032418; GO:0033157; GO:0042802; GO:0043014; GO:0043203; GO:0043547; GO:0044877; GO:0045773; GO:0047496; GO:0048487; GO:…	NDEL1	38,375	4476
CTR_vs_KIA0408	0.0299447	0.0673125	0.444861	3	0.686559	0.768918		0.163322	0.11412	0.0299447	NEK1	Serine/threonine-protein kinase Nek1	FALSE	0.0299447	Serine/threonine-protein kinase Nek1 (EC 2.7.11.1) (Never in mitosis A-related kinase 1) (NimA-related protein kinase 1) (Renal carcinoma antigen NY-REN-55)	NEK1_HUMAN	SUBCELLULAR LOCATION: Nucleus {ECO:0000269|PubMed:15604234, ECO:0000305|PubMed:21211617}. Cytoplasm, cytoskeleton, microtubule organizing center, centrosome {ECO:0000250|UniProtKB:P51954}. Cytoplasm {ECO:0000269|PubMed:18843199}. Note=Associated with the pericentriolar material (PubMed:21211617). Localizes to centrosome during interphase and mitosis (By similarity). Translocated from cytoplasm to…	centrosome [GO:0005813]; cytoplasm [GO:0005737]; nucleus [GO:0005634]; pericentriolar material [GO:0000242]; 14-3-3 protein binding [GO:0071889]; ATP binding [GO:0005524]; kinase activity [GO:0016301]; metal ion binding [GO:0046872]; protein kinase activity [GO:0004672]; protein serine/threonine kinase activity [GO:0004674]; protein tyrosine kinase activity [GO:0004713]; activation of protein kin…	GO:0000242; GO:0004672; GO:0004674; GO:0004713; GO:0005524; GO:0005634; GO:0005737; GO:0005813; GO:0006468; GO:0007049; GO:0007346; GO:0016301; GO:0023014; GO:0031098; GO:0032147; GO:0042769; GO:0042981; GO:0046872; GO:0051301; GO:0060271; GO:0071889	NEK1	142,828	4100
CTR_vs_KIA0408	-0.151336	0.588085	-0.257337	3	0.81356	0.865597		0.0896104	0.0626842	0.151336	NEK6	Serine/threonine-protein kinase Nek6	FALSE	0.151336	Serine/threonine-protein kinase Nek6 (EC 2.7.11.1) (Never in mitosis A-related kinase 6) (NimA-related protein kinase 6) (Protein kinase SID6-1512)	NEK6_HUMAN	SUBCELLULAR LOCATION: Cytoplasm. Nucleus. Nucleus speckle. Cytoplasm, cytoskeleton, microtubule organizing center, centrosome. Cytoplasm, cytoskeleton, spindle pole. Note=Colocalizes with APBB1 at the nuclear speckles. Colocalizes with PIN1 in the nucleus. Colocalizes with ATF4, CIR1, ARHGAP33, ANKRA2, CDC42, NEK9, RAD26L, RBBP6, RPS7, TRIP4, RELB and PHF1 in the centrosome. Localizes to spindle …	cytoplasm [GO:0005737]; cytosol [GO:0005829]; intracellular membrane-bounded organelle [GO:0043231]; microtubule [GO:0005874]; microtubule organizing center [GO:0005815]; nuclear speck [GO:0016607]; nucleoplasm [GO:0005654]; nucleus [GO:0005634]; protein-containing complex [GO:0032991]; spindle pole [GO:0000922]; activating transcription factor binding [GO:0033613]; ATP binding [GO:0005524]; kine…	GO:0000287; GO:0000922; GO:0001222; GO:0004674; GO:0005524; GO:0005634; GO:0005654; GO:0005737; GO:0005815; GO:0005829; GO:0005874; GO:0006468; GO:0006915; GO:0007059; GO:0007077; GO:0007346; GO:0016607; GO:0018105; GO:0019894; GO:0019901; GO:0030071; GO:0031625; GO:0032991; GO:0033613; GO:0043123; GO:0043231; GO:0046777; GO:0051225; GO:0051301; GO:2000772	NEK6	35,714	4726
CTR_vs_KIA0408	0.609781	0.210325	2.89923	3	0.0625414	0.150176		1.20383	0.823399	0.609781	NEK7	Serine/threonine-protein kinase Nek7	FALSE	0.609781	Serine/threonine-protein kinase Nek7 (EC 2.7.11.1) (Never in mitosis A-related kinase 7) (NimA-related protein kinase 7)	NEK7_HUMAN	SUBCELLULAR LOCATION: Nucleus. Cytoplasm. Cytoplasm, cytoskeleton, spindle pole. Cytoplasm, cytoskeleton, microtubule organizing center, centrosome. Note=Present at centrosome throughout the cell cycle. Also detected at spindle midzone of the anaphase cells and eventually concentrates at the midbody.	cytoplasm [GO:0005737]; microtubule [GO:0005874]; microtubule organizing center [GO:0005815]; nucleoplasm [GO:0005654]; spindle pole [GO:0000922]; ATP binding [GO:0005524]; metal ion binding [GO:0046872]; protein serine/threonine kinase activity [GO:0004674]; positive regulation of telomerase activity [GO:0051973]; positive regulation of telomere capping [GO:1904355]; positive regulation of telom…	GO:0000922; GO:0004674; GO:0005524; GO:0005654; GO:0005737; GO:0005815; GO:0005874; GO:0006468; GO:0007346; GO:0032212; GO:0046872; GO:0051225; GO:0051973; GO:1904355	NEK7	34,551	3631
CTR_vs_KIA0408	-0.301943	0.0698189	-4.32466	3	0.0227905	0.0837236		1.64225	1.07715	0.301943	NEK9	Serine/threonine-protein kinase Nek9	FALSE	0.301943	Serine/threonine-protein kinase Nek9 (EC 2.7.11.1) (Nercc1 kinase) (Never in mitosis A-related kinase 9) (NimA-related protein kinase 9) (NimA-related kinase 8) (Nek8)	NEK9_HUMAN	SUBCELLULAR LOCATION: Cytoplasm {ECO:0000269|PubMed:14660563}. Nucleus {ECO:0000269|PubMed:14660563}.	cytosol [GO:0005829]; nucleus [GO:0005634]; ATP binding [GO:0005524]; metal ion binding [GO:0046872]; protein kinase binding [GO:0019901]; protein serine/threonine kinase activity [GO:0004674]; cell division [GO:0051301]; mitotic nuclear envelope disassembly [GO:0007077]	GO:0004674; GO:0005524; GO:0005634; GO:0005829; GO:0007077; GO:0019901; GO:0046872; GO:0051301	NEK9	107,168	3619
CTR_vs_KIA0408	1.92153	0.153625	12.5079	3	0.00110157	0.020155		2.95799	1.69562	1.92153	NIN	Ninein	FALSE	1.92153	Ninein (hNinein) (Glycogen synthase kinase 3 beta-interacting protein) (GSK3B-interacting protein)	NIN_HUMAN	SUBCELLULAR LOCATION: Cytoplasm, cytoskeleton, microtubule organizing center, centrosome {ECO:0000269|PubMed:11004522, ECO:0000269|PubMed:11956314, ECO:0000269|PubMed:12403812, ECO:0000269|PubMed:12927815, ECO:0000269|PubMed:15190203}. Cytoplasm, cytoskeleton, microtubule organizing center, centrosome, centriole {ECO:0000269|PubMed:23386061}. Note=Component of the core centrosome. Arranged in a t…	centriolar subdistal appendage [GO:0120103]; centriole [GO:0005814]; centrosome [GO:0005813]; ciliary transition fiber [GO:0097539]; microtubule minus-end [GO:0036449]; mitotic spindle [GO:0072686]; mitotic spindle pole [GO:0097431]; nucleolus [GO:0005730]; nucleus [GO:0005634]; pericentriolar material [GO:0000242]; spindle pole [GO:0000922]; calcium ion binding [GO:0005509]; GTP binding [GO:0005…	GO:0000242; GO:0000922; GO:0005509; GO:0005525; GO:0005634; GO:0005730; GO:0005813; GO:0005814; GO:0008104; GO:0010457; GO:0034454; GO:0036449; GO:0051642; GO:0072686; GO:0090222; GO:0097431; GO:0097539; GO:0120103	NIN	243,249	3431
CTR_vs_KIA0408	2.00265	0.566261	3.53663	3	0.0384563	0.112887		1.41503	0.947358	2.00265	NPHP3	Nephrocystin-3	FALSE	2.00265	Nephrocystin-3	NPHP3_HUMAN	SUBCELLULAR LOCATION: Cell projection, cilium {ECO:0000269|PubMed:20462968, ECO:0000269|PubMed:22085962}. Note=Localization to cilium is mediated via interaction with UNC119 and UNC119B, which bind to the myristoyl moiety of the N-terminus.	cilium [GO:0005929]; cytosol [GO:0005829]; atrial septum development [GO:0003283]; cilium assembly [GO:0060271]; convergent extension involved in gastrulation [GO:0060027]; determination of intestine left/right asymmetry [GO:0071908]; determination of left/right symmetry [GO:0007368]; determination of liver left/right asymmetry [GO:0071910]; determination of pancreatic left/right asymmetry [GO:00…	GO:0001822; GO:0001947; GO:0003283; GO:0005829; GO:0005929; GO:0007368; GO:0016055; GO:0030324; GO:0035469; GO:0045494; GO:0048496; GO:0060027; GO:0060271; GO:0060287; GO:0060993; GO:0071908; GO:0071909; GO:0071910; GO:0072189; GO:0090090; GO:2000095; GO:2000167	NPHP3	150,864	3143
CTR_vs_KIA0408	-0.67245	0.0698601	-9.62568	3	0.00237988	0.0284652		2.62344	1.54569	0.67245	NPHP4	Nephrocystin-4	FALSE	0.67245	Nephrocystin-4 (Nephroretinin)	NPHP4_HUMAN	SUBCELLULAR LOCATION: Cytoplasm, cytoskeleton, cilium basal body {ECO:0000269|PubMed:17558407, ECO:0000269|PubMed:26644512}. Cytoplasm, cytoskeleton, microtubule organizing center, centrosome. Cell junction, tight junction {ECO:0000250|UniProtKB:P59240}. Nucleus {ECO:0000269|PubMed:22654112}. Note=In cultured renal cells, it localizes diffusely in the cytoplasm but, as cells approach confluence, …	bicellular tight junction [GO:0005923]; cell-cell junction [GO:0005911]; centrosome [GO:0005813]; ciliary basal body [GO:0036064]; ciliary base [GO:0097546]; cytosol [GO:0005829]; nucleus [GO:0005634]; photoreceptor connecting cilium [GO:0032391]; ribbon synapse [GO:0097470]; structural molecule activity [GO:0005198]; actin cytoskeleton organization [GO:0030036]; cell-cell adhesion [GO:0098609]; …	GO:0005198; GO:0005634; GO:0005813; GO:0005829; GO:0005911; GO:0005923; GO:0007165; GO:0007632; GO:0030036; GO:0030317; GO:0032391; GO:0035329; GO:0035845; GO:0036064; GO:0045494; GO:0060041; GO:0090090; GO:0097470; GO:0097546; GO:0097711; GO:0098609; GO:1903348	NPHP4	157,598	454
CTR_vs_KIA0408	1.0928	0.291963	3.74295	3	0.033277	0.104115		1.47786	0.982485	1.0928	ODF2	Outer dense fiber protein 2	FALSE	1.0928	Outer dense fiber protein 2 (Cenexin) (Outer dense fiber of sperm tails protein 2)	ODFP2_HUMAN	SUBCELLULAR LOCATION: Cytoplasm, cytoskeleton, microtubule organizing center, centrosome {ECO:0000269|PubMed:16966375}. Cell projection, cilium {ECO:0000250|UniProtKB:A3KGV1}. Cytoplasm, cytoskeleton, microtubule organizing center, centrosome, centriole {ECO:0000269|PubMed:23400999}. Cytoplasm, cytoskeleton, spindle pole {ECO:0000250|UniProtKB:A3KGV1}. Note=Localized at the microtubule organizing…	centriolar subdistal appendage [GO:0120103]; centriole [GO:0005814]; centrosome [GO:0005813]; ciliary basal body [GO:0036064]; ciliary transition fiber [GO:0097539]; cilium [GO:0005929]; cytosol [GO:0005829]; microtubule [GO:0005874]; nucleus [GO:0005634]; outer dense fiber [GO:0001520]; spindle pole [GO:0000922]; Rab GTPase binding [GO:0017137]; structural molecule activity [GO:0005198]; centrio…	GO:0000086; GO:0000922; GO:0001520; GO:0005198; GO:0005634; GO:0005813; GO:0005814; GO:0005829; GO:0005874; GO:0005929; GO:0007275; GO:0007286; GO:0008104; GO:0010389; GO:0010457; GO:0017137; GO:0036064; GO:0097539; GO:0097711; GO:0120103; GO:1902017	ODF2	95,401	2718
CTR_vs_KIA0408	2.72418	0.131889	20.6551	3	0.000248163	0.0118593		3.60526	1.92594	2.72418	OFD1	Oral-facial-digital syndrome 1 protein	FALSE	2.72418	Oral-facial-digital syndrome 1 protein (Protein 71-7A)	OFD1_HUMAN	SUBCELLULAR LOCATION: Cytoplasm, cytoskeleton, microtubule organizing center, centrosome, centriole {ECO:0000269|PubMed:12595504, ECO:0000269|PubMed:14654843, ECO:0000269|PubMed:20230748, ECO:0000269|PubMed:26643951}. Cytoplasm, cytoskeleton, cilium basal body {ECO:0000269|PubMed:17761535}. Nucleus {ECO:0000269|PubMed:17761535}. Cytoplasm, cytoskeleton, microtubule organizing center, centrosome, …	centriolar satellite [GO:0034451]; centriole [GO:0005814]; centrosome [GO:0005813]; ciliary basal body [GO:0036064]; cilium [GO:0005929]; cytosol [GO:0005829]; membrane [GO:0016020]; nucleus [GO:0005634]; alpha-tubulin binding [GO:0043014]; gamma-tubulin binding [GO:0043015]; identical protein binding [GO:0042802]; ciliary basal body-plasma membrane docking [GO:0097711]; cilium assembly [GO:00602…	GO:0000086; GO:0005634; GO:0005813; GO:0005814; GO:0005829; GO:0005929; GO:0010389; GO:0016020; GO:0034451; GO:0036064; GO:0042802; GO:0043014; GO:0043015; GO:0060271; GO:0060287; GO:0097711	OFD1	116,671	520
CTR_vs_KIA0408	-1.8878	0.241406	-7.82001	3	0.00435368	0.0379449		2.36114	1.42085	1.8878	ORC2	Origin recognition complex subunit 2	FALSE	1.8878	Origin recognition complex subunit 2	ORC2_HUMAN	SUBCELLULAR LOCATION: Nucleus.	centrosome [GO:0005813]; condensed chromosome inner kinetochore [GO:0000939]; heterochromatin [GO:0000792]; membrane [GO:0016020]; nuclear chromosome, telomeric region [GO:0000784]; nuclear origin of replication recognition complex [GO:0005664]; nucleoplasm [GO:0005654]; nucleus [GO:0005634]; origin recognition complex [GO:0000808]; DNA replication origin binding [GO:0003688]; DNA replication [GO…	GO:0000082; GO:0000122; GO:0000784; GO:0000792; GO:0000808; GO:0000939; GO:0003688; GO:0005634; GO:0005654; GO:0005664; GO:0005813; GO:0006260; GO:0006270; GO:0016020	ORC2	65,972	2227
CTR_vs_KIA0408	3.14063	0.229293	13.697	3	0.000842016	0.0181815		3.07468	1.74037	3.14063	PCM1	Pericentriolar material 1 protein	FALSE	3.14063	Pericentriolar material 1 protein (PCM-1) (hPCM-1)	PCM1_HUMAN	SUBCELLULAR LOCATION: Cytoplasm, cytoskeleton. Cytoplasm, cytoskeleton, microtubule organizing center, centrosome {ECO:0000269|PubMed:20719959}. Cytoplasmic granule {ECO:0000269|PubMed:15107855}. Cytoplasm, cytoskeleton, microtubule organizing center, centrosome, centriolar satellite {ECO:0000269|PubMed:15107855, ECO:0000269|PubMed:20719959}. Cytoplasm, cytoskeleton, cilium basal body {ECO:000026…	apical part of cell [GO:0045177]; centriolar satellite [GO:0034451]; centriole [GO:0005814]; centrosome [GO:0005813]; ciliary basal body [GO:0036064]; ciliary transition zone [GO:0035869]; cytoplasm [GO:0005737]; cytosol [GO:0005829]; membrane [GO:0016020]; nuclear membrane [GO:0031965]; pericentriolar material [GO:0000242]; protein-containing complex [GO:0032991]; identical protein binding [GO:0…	GO:0000086; GO:0000242; GO:0001764; GO:0005737; GO:0005813; GO:0005814; GO:0005829; GO:0007098; GO:0010389; GO:0016020; GO:0022027; GO:0031122; GO:0031965; GO:0032991; GO:0034451; GO:0034453; GO:0034454; GO:0035176; GO:0035735; GO:0035869; GO:0036064; GO:0042802; GO:0045177; GO:0050768; GO:0060271; GO:0071539; GO:0090316; GO:0097150; GO:0097711; GO:1905515	PCM1	228,544	2464
CTR_vs_KIA0408	1.70754	0.0904783	18.8724	3	0.000324801	0.013369		3.48838	1.8739	1.70754	PCNT	Pericentrin	FALSE	1.70754	Pericentrin (Kendrin) (Pericentrin-B)	PCNT_HUMAN	SUBCELLULAR LOCATION: Cytoplasm, cytoskeleton, microtubule organizing center, centrosome {ECO:0000269|PubMed:10823944, ECO:0000269|PubMed:11171385, ECO:0000269|PubMed:18955030, ECO:0000269|PubMed:22797915, ECO:0000269|PubMed:27137183}. Note=Centrosomal at all stages of the cell cycle. Remains associated with centrosomes following microtubule depolymerization. Colocalized with DISC1 at the centros…	centriolar satellite [GO:0034451]; centriole [GO:0005814]; centrosome [GO:0005813]; cytosol [GO:0005829]; membrane [GO:0016020]; microtubule [GO:0005874]; microtubule organizing center [GO:0005815]; calmodulin binding [GO:0005516]; protein-containing complex scaffold activity [GO:0032947]; ciliary basal body-plasma membrane docking [GO:0097711]; cilium assembly [GO:0060271]; G2/M transition of mi…	GO:0000086; GO:0000226; GO:0005516; GO:0005813; GO:0005814; GO:0005815; GO:0005829; GO:0005874; GO:0007052; GO:0007165; GO:0010389; GO:0016020; GO:0032947; GO:0034451; GO:0060271; GO:0090316; GO:0097711	PCNT	378,037	678
CTR_vs_KIA0408	-0.783864	0.299532	-2.61696	3	0.0792083	0.174308		1.10123	0.758683	0.783864	PKD2	Polycystin-2	FALSE	0.783864	Polycystin-2 (PC2) (Autosomal dominant polycystic kidney disease type II protein) (Polycystic kidney disease 2 protein) (Polycystwin) (R48321) (Transient receptor potential cation channel subfamily P member 2)	PKD2_HUMAN	SUBCELLULAR LOCATION: Cell projection, cilium membrane {ECO:0000269|PubMed:18695040, ECO:0000269|PubMed:20881056, ECO:0000269|PubMed:27259053}; Multi-pass membrane protein {ECO:0000269|PubMed:27768895, ECO:0000269|PubMed:27991905, ECO:0000269|PubMed:28092368}. Endoplasmic reticulum membrane {ECO:0000269|PubMed:10760273, ECO:0000269|PubMed:11854751, ECO:0000269|PubMed:15692563, ECO:0000269|PubMed:…	basal cortex [GO:0045180]; basal plasma membrane [GO:0009925]; cell-cell junction [GO:0005911]; ciliary basal body [GO:0036064]; ciliary membrane [GO:0060170]; cilium [GO:0005929]; cytoplasm [GO:0005737]; cytoplasmic vesicle membrane [GO:0030659]; endoplasmic reticulum [GO:0005783]; endoplasmic reticulum membrane [GO:0005789]; extracellular exosome [GO:0070062]; integral component of cytoplasmic …	GO:0001658; GO:0001889; GO:0001892; GO:0001947; GO:0002133; GO:0003127; GO:0005102; GO:0005244; GO:0005245; GO:0005248; GO:0005249; GO:0005267; GO:0005509; GO:0005737; GO:0005783; GO:0005789; GO:0005886; GO:0005887; GO:0005911; GO:0005929; GO:0006816; GO:0007050; GO:0007259; GO:0007368; GO:0007507; GO:0008092; GO:0008285; GO:0009925; GO:0015271; GO:0021510; GO:0021915; GO:0022843; GO:0030027; GO:…	PKD2	109,691	2263
CTR_vs_KIA0408	0.329912	0.247408	1.33347	3	0.274584	0.397735		0.561324	0.400406	0.329912	PLK1	Serine/threonine-protein kinase PLK1	FALSE	0.329912	Serine/threonine-protein kinase PLK1 (EC 2.7.11.21) (Polo-like kinase 1) (PLK-1) (Serine/threonine-protein kinase 13) (STPK13)	PLK1_HUMAN	SUBCELLULAR LOCATION: Nucleus. Chromosome, centromere, kinetochore. Cytoplasm, cytoskeleton, microtubule organizing center, centrosome {ECO:0000269|PubMed:24018379}. Cytoplasm, cytoskeleton, spindle {ECO:0000269|PubMed:18794143}. Midbody. Note=localization at the centrosome starts at the G1/S transition (PubMed:24018379). During early stages of mitosis, the phosphorylated form is detected on cent…	centrosome [GO:0005813]; chromatin [GO:0000785]; condensed nuclear chromosome outer kinetochore [GO:0000942]; cytosol [GO:0005829]; kinetochore [GO:0000776]; microtubule cytoskeleton [GO:0015630]; midbody [GO:0030496]; nucleoplasm [GO:0005654]; nucleus [GO:0005634]; spindle [GO:0005819]; spindle midzone [GO:0051233]; spindle pole [GO:0000922]; synaptonemal complex [GO:0000795]; anaphase-promoting…	GO:0000070; GO:0000086; GO:0000122; GO:0000278; GO:0000281; GO:0000287; GO:0000776; GO:0000785; GO:0000795; GO:0000922; GO:0000942; GO:0001578; GO:0004672; GO:0004674; GO:0005524; GO:0005634; GO:0005654; GO:0005813; GO:0005819; GO:0005829; GO:0006468; GO:0007062; GO:0007077; GO:0007094; GO:0007098; GO:0007346; GO:0008017; GO:0008283; GO:0010389; GO:0010800; GO:0010997; GO:0015630; GO:0016301; GO:…	PLK1	68,255	1669
CTR_vs_KIA0408	-0.38707	0.224346	-1.72533	3	0.182931	0.302064		0.737713	0.519902	0.38707	PLK2	Serine/threonine-protein kinase PLK2	FALSE	0.38707	Serine/threonine-protein kinase PLK2 (EC 2.7.11.21) (Polo-like kinase 2) (PLK-2) (hPlk2) (Serine/threonine-protein kinase SNK) (hSNK) (Serum-inducible kinase)	PLK2_HUMAN	SUBCELLULAR LOCATION: Cytoplasm, cytoskeleton, microtubule organizing center, centrosome, centriole {ECO:0000269|PubMed:15242618, ECO:0000269|PubMed:19001868}. Cell projection, dendrite {ECO:0000250}. Note=Localizes to centrosomes during early G1 phase where it only associates to the mother centriole and then distributes equally to both mother and daughter centrioles at the onset of S phase.	centriole [GO:0005814]; centrosome [GO:0005813]; chromatin [GO:0000785]; cytoplasm [GO:0005737]; cytosol [GO:0005829]; dendrite [GO:0030425]; intracellular [GO:0005622]; ATP binding [GO:0005524]; ATP-dependent protein binding [GO:0043008]; protein serine/threonine kinase activity [GO:0004674]; protein-containing complex binding [GO:0044877]; DNA damage response, signal transduction by p53 class m…	GO:0000082; GO:0000785; GO:0004674; GO:0005524; GO:0005622; GO:0005737; GO:0005813; GO:0005814; GO:0005829; GO:0006468; GO:0006977; GO:0007052; GO:0007093; GO:0007265; GO:0007613; GO:0010508; GO:0016525; GO:0018105; GO:0030425; GO:0032092; GO:0032436; GO:0032486; GO:0043008; GO:0043066; GO:0043123; GO:0044877; GO:0045732; GO:0046599; GO:0048167; GO:0060291; GO:0060292; GO:0061000; GO:0071866; GO:…	PLK2	78,237	4988
CTR_vs_KIA0408	-0.537858	0.277713	-1.93674	3	0.148184	0.261129		0.829197	0.583145	0.537858	POC1A	POC1 centriolar protein homolog A	FALSE	0.537858	POC1 centriolar protein homolog A (Pix2) (Proteome of centriole protein 1A) (WD repeat-containing protein 51A)	POC1A_HUMAN	SUBCELLULAR LOCATION: Cytoplasm, cytoskeleton, microtubule organizing center, centrosome, centriole. Cytoplasm, cytoskeleton, cilium basal body. Cytoplasm, cytoskeleton, spindle pole. Note=Component of both mother and daughter centrioles.	centriole [GO:0005814]; centrosome [GO:0005813]; ciliary basal body [GO:0036064]; spindle pole [GO:0000922]; growth plate cartilage chondrocyte development [GO:0003431]; mitotic spindle organization [GO:0007052]; non-motile cilium assembly [GO:1905515]; positive regulation of centrosome duplication [GO:0010825]; spermatogenesis [GO:0007283]	GO:0000922; GO:0003431; GO:0005813; GO:0005814; GO:0007052; GO:0007283; GO:0010825; GO:0036064; GO:1905515	POC1A	45,009	3505
CTR_vs_KIA0408	-0.458102	0.120768	-3.79322	3	0.0321525	0.102088		1.49279	0.991026	0.458102	RTTN	Rotatin	FALSE	0.458102	Rotatin	RTTN_HUMAN	SUBCELLULAR LOCATION: Cytoplasm, cytoskeleton, cilium basal body {ECO:0000269|PubMed:22939636}. Note=Colocalizes with the basal bodies at the primary cilium.	centrosome [GO:0005813]; ciliary basal body [GO:0036064]; cytoplasm [GO:0005737]; cilium organization [GO:0044782]; determination of left/right symmetry [GO:0007368]	GO:0005737; GO:0005813; GO:0007368; GO:0036064; GO:0044782	RTTN	248,630	3234
CTR_vs_KIA0408	0.995755	0.25024	3.9792	3	0.028393	0.095189		1.54679	1.02141	0.995755	SCLT1	Sodium channel and clathrin linker 1	FALSE	0.995755	Sodium channel and clathrin linker 1 (Sodium channel-associated protein 1)	SCLT1_HUMAN	SUBCELLULAR LOCATION: Cytoplasm, cytoskeleton, microtubule organizing center, centrosome, centriole {ECO:0000269|PubMed:23348840}. Note=Localizes to the distal appendage region of the centriole, which anchors the mother centriole to the plasma membrane.	centriole [GO:0005814]; centrosome [GO:0005813]; ciliary transition fiber [GO:0097539]; clathrin complex [GO:0071439]; cytosol [GO:0005829]; clathrin binding [GO:0030276]; protein C-terminus binding [GO:0008022]; sodium channel regulator activity [GO:0017080]; ciliary basal body-plasma membrane docking [GO:0097711]; cilium assembly [GO:0060271]; clustering of voltage-gated sodium channels [GO:004…	GO:0005813; GO:0005814; GO:0005829; GO:0008022; GO:0017080; GO:0030276; GO:0045162; GO:0060271; GO:0071439; GO:0097539; GO:0097711	SCLT1	80,910	4078
CTR_vs_KIA0408	0.339859	0.102757	3.3074	3	0.0454804	0.124196		1.34218	0.905893	0.339859	SEPTIN2	Septin-2	FALSE	0.339859	Septin-2 (Neural precursor cell expressed developmentally down-regulated protein 5) (NEDD-5)	SEPT2_HUMAN	SUBCELLULAR LOCATION: Cytoplasm {ECO:0000269|PubMed:15774761}. Cytoplasm, cytoskeleton {ECO:0000269|PubMed:15774761}. Cytoplasm, cytoskeleton, spindle {ECO:0000269|PubMed:15774761}. Chromosome, centromere, kinetochore {ECO:0000269|PubMed:15774761}. Cleavage furrow {ECO:0000269|PubMed:15774761}. Midbody {ECO:0000269|PubMed:15774761}. Cytoplasm, cell cortex {ECO:0000269|PubMed:15774761}. Cell proje…	axoneme [GO:0005930]; ciliary membrane [GO:0060170]; cleavage furrow [GO:0032154]; condensed chromosome kinetochore [GO:0000777]; cytoplasm [GO:0005737]; exocyst [GO:0000145]; extracellular exosome [GO:0070062]; midbody [GO:0030496]; non-motile cilium [GO:0097730]; nucleus [GO:0005634]; perinuclear region of cytoplasm [GO:0048471]; photoreceptor connecting cilium [GO:0032391]; septin complex [GO:…	GO:0000145; GO:0000777; GO:0005525; GO:0005634; GO:0005737; GO:0005819; GO:0005930; GO:0007049; GO:0007224; GO:0007283; GO:0030496; GO:0031105; GO:0031175; GO:0032154; GO:0032391; GO:0042802; GO:0045296; GO:0048471; GO:0051301; GO:0060170; GO:0060271; GO:0070062; GO:0097227; GO:0097730	SEPT2	41,487	2427
CTR_vs_KIA0408	1.03376	0.261952	3.94638	3	0.0290138	0.0963539		1.5374	1.01613	1.03376	SEPTIN3	Neuronal-specific septin-3	FALSE	1.03376	Neuronal-specific septin-3	SEPT3_HUMAN	SUBCELLULAR LOCATION: Cytoplasm. Cytoplasm, cytoskeleton {ECO:0000250}. Cell junction, synapse {ECO:0000250}.	cell junction [GO:0030054]; cytoplasm [GO:0005737]; cytoskeleton [GO:0005856]; synapse [GO:0045202]; GTP binding [GO:0005525]; identical protein binding [GO:0042802]; cell cycle [GO:0007049]; cell division [GO:0051301]	GO:0005525; GO:0005737; GO:0005856; GO:0007049; GO:0030054; GO:0042802; GO:0045202; GO:0051301	SEPT3	40,704	5167
CTR_vs_KIA0408	-0.174133	0.0978789	-1.77906	3	0.173281	0.291246		0.761249	0.535739	0.174133	SMARCA1	Probable global transcription activator SNF2L1	FALSE	0.174133	Probable global transcription activator SNF2L1 (EC 3.6.4.-) (ATP-dependent helicase SMARCA1) (Nucleosome-remodeling factor subunit SNF2L) (SWI/SNF-related matrix-associated actin-dependent regulator of chromatin subfamily A member 1)	SMCA1_HUMAN	SUBCELLULAR LOCATION: Nucleus.	CERF complex [GO:0090537]; intracellular membrane-bounded organelle [GO:0043231]; nucleoplasm [GO:0005654]; nucleus [GO:0005634]; NURF complex [GO:0016589]; annealing helicase activity [GO:0036310]; ATP binding [GO:0005524]; ATPase activity [GO:0016887]; DNA binding [GO:0003677]; helicase activity [GO:0004386]; nucleosome binding [GO:0031491]; RNA polymerase II transcription factor activity, sequ…	GO:0000981; GO:0003677; GO:0004386; GO:0005524; GO:0005634; GO:0005654; GO:0006338; GO:0006351; GO:0007420; GO:0008134; GO:0016589; GO:0016887; GO:0030182; GO:0031491; GO:0036310; GO:0043044; GO:0043231; GO:0045893; GO:0090537	SMARCA1	122,605	1210
CTR_vs_KIA0408	-0.248749	0.158685	-1.56756	3	0.214978	0.334524		0.667605	0.475572	0.248749	SMARCA4	Transcription activator BRG1	FALSE	0.248749	Transcription activator BRG1 (EC 3.6.4.-) (ATP-dependent helicase SMARCA4) (BRG1-associated factor 190A) (BAF190A) (Mitotic growth and transcription activator) (Protein BRG-1) (Protein brahma homolog 1) (SNF2-beta) (SWI/SNF-related matrix-associated actin-dependent regulator of chromatin subfamily A member 4)	SMCA4_HUMAN	SUBCELLULAR LOCATION: Nucleus {ECO:0000255|PROSITE-ProRule:PRU00549, ECO:0000269|PubMed:20418909}. Note=Colocalizes with long non-coding RNA Evf2 in nuclear RNA clouds. {ECO:0000250|UniProtKB:Q3TKT4}.	extracellular space [GO:0005615]; membrane [GO:0016020]; nBAF complex [GO:0071565]; npBAF complex [GO:0071564]; nuclear chromatin [GO:0000790]; nucleolus [GO:0005730]; nucleoplasm [GO:0005654]; nucleus [GO:0005634]; protein-containing complex [GO:0032991]; SWI/SNF complex [GO:0016514]; androgen receptor binding [GO:0050681]; ATP binding [GO:0005524]; DNA polymerase binding [GO:0070182]; DNA-depen…	GO:0000122; GO:0000790; GO:0001105; GO:0001164; GO:0002039; GO:0003407; GO:0003713; GO:0003714; GO:0003723; GO:0004386; GO:0005524; GO:0005615; GO:0005634; GO:0005654; GO:0005730; GO:0006325; GO:0006337; GO:0006338; GO:0006357; GO:0007399; GO:0008094; GO:0008134; GO:0016020; GO:0016514; GO:0030177; GO:0030308; GO:0030957; GO:0032991; GO:0038111; GO:0043044; GO:0043923; GO:0045892; GO:0045893; GO:…	SMARCA4	184,646	1614
CTR_vs_KIA0408	-0.954307	0.268719	-3.55132	3	0.0380548	0.112234		1.41959	0.949877	0.954307	SMARCC1	SWI/SNF complex subunit SMARCC1	FALSE	0.954307	SWI/SNF complex subunit SMARCC1 (BRG1-associated factor 155) (BAF155) (SWI/SNF complex 155 kDa subunit) (SWI/SNF-related matrix-associated actin-dependent regulator of chromatin subfamily C member 1)	SMRC1_HUMAN	SUBCELLULAR LOCATION: Nucleus {ECO:0000269|PubMed:28753627}. Cytoplasm {ECO:0000269|PubMed:28753627}.	cytoplasm [GO:0005737]; nBAF complex [GO:0071565]; npBAF complex [GO:0071564]; nuclear chromatin [GO:0000790]; nucleoplasm [GO:0005654]; nucleus [GO:0005634]; protein-containing complex [GO:0032991]; SWI/SNF complex [GO:0016514]; XY body [GO:0001741]; chromatin binding [GO:0003682]; DNA binding [GO:0003677]; protein N-terminus binding [GO:0047485]; RNA polymerase II transcription factor activity,…	GO:0000790; GO:0000981; GO:0001741; GO:0003677; GO:0003682; GO:0003713; GO:0005634; GO:0005654; GO:0005737; GO:0006337; GO:0006338; GO:0006351; GO:0006357; GO:0007399; GO:0008286; GO:0009887; GO:0016514; GO:0030850; GO:0032435; GO:0032991; GO:0043044; GO:0045893; GO:0045944; GO:0047485; GO:0071564; GO:0071565	SMARCC1	122,867	3818
CTR_vs_KIA0408	1.45459	0.131545	11.0578	3	0.00158427	0.0234777		2.80017	1.62934	1.45459	SPICE1	Spindle and centriole-associated protein 1	FALSE	1.45459	Spindle and centriole-associated protein 1 (Coiled-coil domain-containing protein 52) (Spindle and centriole-associated protein)	SPICE_HUMAN	SUBCELLULAR LOCATION: Cytoplasm, cytoskeleton, microtubule organizing center, centrosome, centriole {ECO:0000269|PubMed:20736305}. Cytoplasm, cytoskeleton, spindle {ECO:0000269|PubMed:20736305}.	centriole [GO:0005814]; centrosome [GO:0005813]; spindle [GO:0005819]; cell division [GO:0051301]; metaphase plate congression [GO:0051310]; mitotic spindle assembly [GO:0090307]; regulation of centriole replication [GO:0046599]	GO:0005813; GO:0005814; GO:0005819; GO:0046599; GO:0051301; GO:0051310; GO:0090307	SPICE1	96,264	3393
CTR_vs_KIA0408	2.32475	0.27695	8.39411	3	0.00354642	0.0340107		2.45021	1.46838	2.32475	SUFU	Suppressor of fused homolog	FALSE	2.32475	Suppressor of fused homolog (SUFUH)	SUFU_HUMAN	SUBCELLULAR LOCATION: Cytoplasm {ECO:0000269|PubMed:10559945, ECO:0000269|PubMed:28965847}. Nucleus {ECO:0000269|PubMed:10559945, ECO:0000269|PubMed:28965847}.	ciliary base [GO:0097546]; ciliary tip [GO:0097542]; cytoplasm [GO:0005737]; cytosol [GO:0005829]; nucleus [GO:0005634]; beta-catenin binding [GO:0008013]; protein kinase binding [GO:0019901]; transcription corepressor activity [GO:0003714]; transcription factor binding [GO:0008134]; aorta development [GO:0035904]; coronary vasculature development [GO:0060976]; cytoplasmic sequestering of transcr…	GO:0000122; GO:0001501; GO:0001843; GO:0001947; GO:0003281; GO:0003714; GO:0005634; GO:0005737; GO:0005829; GO:0006355; GO:0006508; GO:0007165; GO:0007275; GO:0008013; GO:0008134; GO:0019901; GO:0021775; GO:0021776; GO:0035904; GO:0042308; GO:0042994; GO:0043433; GO:0043588; GO:0045668; GO:0045879; GO:0060976; GO:0097542; GO:0097546; GO:1901621; GO:2000059	SUFU	53,947	5317
CTR_vs_KIA0408	-1.7705	0.0837069	-21.1512	3	0.000231198	0.0115783		3.63602	1.93636	1.7705	TACC1	Transforming acidic coiled-coil-containing protein 1	FALSE	1.7705	Transforming acidic coiled-coil-containing protein 1 (Gastric cancer antigen Ga55) (Taxin-1)	TACC1_HUMAN	SUBCELLULAR LOCATION: Cytoplasm {ECO:0000269|PubMed:14767476}. Nucleus {ECO:0000269|PubMed:14767476}. Cytoplasm, cytoskeleton, microtubule organizing center, centrosome {ECO:0000269|PubMed:21531210}. Midbody {ECO:0000269|PubMed:21531210}. Note=Nucleus during interphase. Weakly concentrated at centrosomes during mitosis and colocalizes with AURKC at the midbody during cytokinesis. {ECO:0000269|Pub…	cytoplasm [GO:0005737]; membrane [GO:0016020]; microtubule cytoskeleton [GO:0015630]; microtubule organizing center [GO:0005815]; midbody [GO:0030496]; nucleus [GO:0005634]; cell cycle [GO:0007049]; cell division [GO:0051301]; cell proliferation [GO:0008283]; cerebral cortex development [GO:0021987]; microtubule cytoskeleton organization [GO:0000226]	GO:0000226; GO:0005634; GO:0005737; GO:0005815; GO:0007049; GO:0008283; GO:0015630; GO:0016020; GO:0021987; GO:0030496; GO:0051301	TACC1	87,794	488
CTR_vs_KIA0408	-0.751713	0.235047	-3.19814	3	0.049402	0.129631		1.30626	0.88729	0.751713	TACC2	Transforming acidic coiled-coil-containing protein 2	FALSE	0.751713	Transforming acidic coiled-coil-containing protein 2 (Anti-Zuai-1) (AZU-1)	TACC2_HUMAN	SUBCELLULAR LOCATION: Cytoplasm {ECO:0000269|PubMed:10749935}. Nucleus {ECO:0000269|PubMed:10749935, ECO:0000269|PubMed:14767476}. Cytoplasm, cytoskeleton, microtubule organizing center, centrosome {ECO:0000269|PubMed:15304323}.	cytoplasm [GO:0005737]; cytosol [GO:0005829]; microtubule cytoskeleton [GO:0015630]; microtubule organizing center [GO:0005815]; nucleoplasm [GO:0005654]; plasma membrane [GO:0005886]; nuclear hormone receptor binding [GO:0035257]; cell proliferation [GO:0008283]; cerebral cortex development [GO:0021987]; microtubule cytoskeleton organization [GO:0000226]	GO:0000226; GO:0005654; GO:0005737; GO:0005815; GO:0005829; GO:0005886; GO:0008283; GO:0015630; GO:0021987; GO:0035257	TACC2	309,427	650
CTR_vs_KIA0408	-0.366036	0.244695	-1.49589	3	0.231574	0.353026		0.63531	0.452193	0.366036	TACC3	Transforming acidic coiled-coil-containing protein 3	FALSE	0.366036	Transforming acidic coiled-coil-containing protein 3 (ERIC-1)	TACC3_HUMAN	SUBCELLULAR LOCATION: Cytoplasm {ECO:0000250}. Cytoplasm, cytoskeleton, microtubule organizing center, centrosome {ECO:0000269|PubMed:17545617}. Cytoplasm, cytoskeleton, spindle {ECO:0000269|PubMed:17545617, ECO:0000269|PubMed:21297582, ECO:0000269|PubMed:23918938}. Cytoplasm, cytoskeleton, spindle pole {ECO:0000250|UniProtKB:Q9PTG8}. Note=In complex with CKAP5 localized to microtubule plus-ends …	cytoplasm [GO:0005737]; cytosol [GO:0005829]; microtubule cytoskeleton [GO:0015630]; microtubule organizing center [GO:0005815]; mitotic spindle [GO:0072686]; spindle pole [GO:0000922]; cell division [GO:0051301]; cell proliferation [GO:0008283]; cerebral cortex development [GO:0021987]; metaphase/anaphase transition of mitotic cell cycle [GO:0007091]; microtubule cytoskeleton organization involv…	GO:0000922; GO:0005737; GO:0005815; GO:0005829; GO:0007091; GO:0008283; GO:0015630; GO:0021987; GO:0051301; GO:0060236; GO:0072686; GO:1902850	TACC3	90,360	5601
CTR_vs_KIA0408	0.677548	0.0769237	8.80804	3	0.00308346	0.0320805		2.51096	1.49376	0.677548	TSC2	Tuberin	FALSE	0.677548	Tuberin (Tuberous sclerosis 2 protein)	TSC2_HUMAN	SUBCELLULAR LOCATION: Cytoplasm. Membrane; Peripheral membrane protein. Note=At steady state found in association with membranes.	cytoplasm [GO:0005737]; cytosol [GO:0005829]; Golgi apparatus [GO:0005794]; lysosome [GO:0005764]; membrane [GO:0016020]; nucleus [GO:0005634]; perinuclear region of cytoplasm [GO:0048471]; TSC1-TSC2 complex [GO:0033596]; GTPase activator activity [GO:0005096]; Hsp90 protein binding [GO:0051879]; phosphatase binding [GO:0019902]; protein homodimerization activity [GO:0042803]; small GTPase bindin…	GO:0001843; GO:0005096; GO:0005634; GO:0005737; GO:0005764; GO:0005794; GO:0005829; GO:0006469; GO:0006606; GO:0006897; GO:0007507; GO:0008104; GO:0008285; GO:0014067; GO:0016020; GO:0016032; GO:0016192; GO:0016239; GO:0019902; GO:0030100; GO:0030178; GO:0031267; GO:0032007; GO:0033596; GO:0042803; GO:0043276; GO:0043491; GO:0046626; GO:0046627; GO:0048009; GO:0048471; GO:0050918; GO:0051056; GO:…	TSC2	200,608	1563
CTR_vs_KIA0408	-0.191932	0.131558	-1.45891	3	0.240681	0.362303		0.618559	0.440928	0.191932	TUBGCP2	Gamma-tubulin complex component 2	FALSE	0.191932	Gamma-tubulin complex component 2 (GCP-2) (hGCP2) (Gamma-ring complex protein 103 kDa) (h103p) (hGrip103) (Spindle pole body protein Spc97 homolog) (hSpc97)	GCP2_HUMAN	SUBCELLULAR LOCATION: Cytoplasm, cytoskeleton, microtubule organizing center, centrosome.	centrosome [GO:0005813]; cytoplasmic microtubule [GO:0005881]; cytosol [GO:0005829]; equatorial microtubule organizing center [GO:0000923]; gamma-tubulin small complex [GO:0008275]; membrane [GO:0016020]; microtubule organizing center [GO:0005815]; nucleoplasm [GO:0005654]; spindle pole [GO:0000922]; gamma-tubulin binding [GO:0043015]; structural constituent of cytoskeleton [GO:0005200]; centroso…	GO:0000922; GO:0000923; GO:0005200; GO:0005654; GO:0005813; GO:0005815; GO:0005829; GO:0005881; GO:0007020; GO:0008275; GO:0016020; GO:0031122; GO:0043015; GO:0051298; GO:0051321; GO:0051415; GO:0065003; GO:0090307	TUBGCP2	102,534	4295
CTR_vs_KIA0408	0.486444	0.150691	3.22809	3	0.0482858	0.127833		1.31618	0.893358	0.486444	TUBGCP3	Gamma-tubulin complex component 3	FALSE	0.486444	Gamma-tubulin complex component 3 (GCP-3) (hGCP3) (Gamma-ring complex protein 104 kDa) (h104p) (hGrip104) (Spindle pole body protein Spc98 homolog) (hSpc98)	GCP3_HUMAN	SUBCELLULAR LOCATION: Cytoplasm, cytoskeleton, microtubule organizing center, centrosome.	centriole [GO:0005814]; centrosome [GO:0005813]; cytoplasm [GO:0005737]; cytosol [GO:0005829]; equatorial microtubule organizing center [GO:0000923]; gamma-tubulin small complex [GO:0008275]; membrane [GO:0016020]; polar microtubule [GO:0005827]; spindle [GO:0005819]; gamma-tubulin binding [GO:0043015]; structural constituent of cytoskeleton [GO:0005200]; structural molecule activity [GO:0005198]…	GO:0000923; GO:0005198; GO:0005200; GO:0005737; GO:0005813; GO:0005814; GO:0005819; GO:0005827; GO:0005829; GO:0007020; GO:0007338; GO:0008275; GO:0016020; GO:0031122; GO:0043015; GO:0051298; GO:0051321; GO:0051415; GO:0090307	TUBGCP3	103,571	3910
CTR_vs_KIA0408	0.62101	0.228209	2.72123	3	0.0724739	0.16499		1.13982	0.782541	0.62101	TUBGCP4	Gamma-tubulin complex component 4	FALSE	0.62101	Gamma-tubulin complex component 4 (GCP-4) (hGCP4) (Gamma-ring complex protein 76 kDa) (h76p) (hGrip76)	GCP4_HUMAN	SUBCELLULAR LOCATION: Cytoplasm, cytoskeleton, microtubule organizing center, centrosome.	centrosome [GO:0005813]; cytosol [GO:0005829]; equatorial microtubule organizing center [GO:0000923]; gamma-tubulin complex [GO:0000930]; gamma-tubulin ring complex [GO:0008274]; membrane [GO:0016020]; microtubule [GO:0005874]; microtubule cytoskeleton [GO:0015630]; recycling endosome [GO:0055037]; spindle pole [GO:0000922]; gamma-tubulin binding [GO:0043015]; structural constituent of cytoskelet…	GO:0000922; GO:0000923; GO:0000930; GO:0005200; GO:0005813; GO:0005829; GO:0005874; GO:0007020; GO:0008274; GO:0015630; GO:0016020; GO:0031122; GO:0043015; GO:0051298; GO:0051321; GO:0051415; GO:0055037; GO:0065003; GO:0090307	TUBGCP4	76,089	5158
CTR_vs_KIA0408	-0.728402	0.234759	-3.10276	3	0.0531808	0.136003		1.27425	0.866452	0.728402	TUBGCP5	Gamma-tubulin complex component 5	FALSE	0.728402	Gamma-tubulin complex component 5 (GCP-5)	GCP5_HUMAN	SUBCELLULAR LOCATION: Cytoplasm, cytoskeleton, microtubule organizing center, centrosome.	centrosome [GO:0005813]; cytosol [GO:0005829]; equatorial microtubule organizing center [GO:0000923]; gamma-tubulin ring complex [GO:0008274]; microtubule [GO:0005874]; spindle pole [GO:0000922]; gamma-tubulin binding [GO:0043015]; microtubule binding [GO:0008017]; structural constituent of cytoskeleton [GO:0005200]; centrosome duplication [GO:0051298]; cytoplasmic microtubule organization [GO:00…	GO:0000922; GO:0000923; GO:0005200; GO:0005813; GO:0005829; GO:0005874; GO:0007020; GO:0008017; GO:0008274; GO:0031122; GO:0043015; GO:0051298; GO:0051321; GO:0051415; GO:0090307	TUBGCP5	118,321	4131
CTR_vs_KIA0408	-0.0130697	0.283317	-0.0461312	3	0.966105	0.97632		0.0149758	0.0104079	0.0130697	WDR62	WD repeat-containing protein 62	FALSE	0.0130697	WD repeat-containing protein 62	WDR62_HUMAN	SUBCELLULAR LOCATION: Nucleus {ECO:0000269|PubMed:20729831, ECO:0000269|PubMed:21496009}. Cytoplasm, cytoskeleton, spindle pole {ECO:0000269|PubMed:20890278, ECO:0000269|PubMed:20890279, ECO:0000269|PubMed:28089251}. Cytoplasm, cytoskeleton, microtubule organizing center, centrosome {ECO:0000269|PubMed:20890278, ECO:0000269|PubMed:21496009, ECO:0000269|PubMed:26297806}. Cytoplasm, cytoskeleton, m…	catalytic step 2 spliceosome [GO:0071013]; centriole [GO:0005814]; centrosome [GO:0005813]; cytosol [GO:0005829]; microtubule organizing center [GO:0005815]; nucleus [GO:0005634]; precatalytic spliceosome [GO:0071011]; spindle pole [GO:0000922]; U5 snRNP [GO:0005682]; RNA binding [GO:0003723]; centriole replication [GO:0007099]; cerebral cortex development [GO:0021987]; mitotic spindle organizati…	GO:0000922; GO:0003723; GO:0005634; GO:0005682; GO:0005813; GO:0005814; GO:0005815; GO:0005829; GO:0007052; GO:0007099; GO:0008380; GO:0021987; GO:0022008; GO:0071011; GO:0071013	WDR62	165,954	297

## Sheet: centriole, cilia and DAP protei
PG.Genes
CCDC61	Appendage
CEP164	Appendage
CEP83	Appendage
LRRCC1	Appendage
NIN	Appendage
ODF2	Appendage
SCLT	Appendage
SCLT1	Appendage
KIAA0408	Bail
AKNA	centriole
CCP110	centriole
CDK5RAP2	Centriole
CEP135	centriole
CEP162	centriole
CEP170	centriole
CEP170B	centriole
CEP192	centriole
CEP20	centriole
CEP250	centriole
CEP350	centriole
CEP43	centriole
CEP44	centriole
CEP55	centriole
CEP57	centriole
CEP57L1	centriole
CEP63	centriole
CEP68	centriole
CEP76	centriole
CEP78	centriole
CETN2	centriole
CFAP20	centriole
CNTROB	Centriole
DYNLT1	centriole
GORASP2	centriole
HAUS1	centriole
HAUS2	centriole
HAUS3	centriole
HAUS4	centriole
HAUS5	centriole
HAUS7	centriole
HAUS8	centriole
JADE1	centriole
NEK1	centriole
PCNT	Centriole
PLK1	centriole
PLK2	centriole
POC1A	centriole
RTTN	centriole
SMARCA1	centriole
SMARCA4	centriole
SMARCC1	centriole
SPICE1	centriole
TACC1	Centriole
TACC2	centriole
TACC3	centriole
TUBGCP2	centriole
TUBGCP3	centriole
TUBGCP4	centriole
TUBGCP5	centriole
WDR62	centriole
CEP131	centriole cilia
CEP72	centriole cilia
CEP85L	Centriole cilia
AURKA	centriole/cilia
CEP128	Centriole/cilia
CEP152	centriole/cilia
CEP41	centriole/cilia
CEP85	centriole/cilia
CEP89	centriole/cilia
CEP95	centriole/cilia
CEP97	centriole/cilia
CYLD	centriole/cilia
HAUS6	centriole/cilia
HDAC6	centriole/cilia
NDE1	centriole/cilia
NDEL1	centriole/cilia
BBS2	cilia
BBS7	cilia
C2CD3	cilia
CEP120	cilia
CEP290	cilia
CFAP157	cilia
CFAP298	cilia
CFAP36	cilia
CFAP410	cilia
CFAP58	cilia
CFAP97	cilia
CSPP1	cilia
DYNC1H1	cilia
DYNC1I2	cilia
DYNC1LI1	cilia
DYNC1LI2	cilia
DYNC2H1	cilia
DYNC2I1	cilia
DYNC2LI1	cilia
DYNLL1	cilia
DYNLL2	cilia
DYNLRB1	cilia
FAM161A	cilia
IFT122	cilia
IFT140	cilia
IFT172	cilia
IFT20	cilia
IFT22	cilia
IFT27	cilia
IFT46	cilia
IFT74	Cilia
IFT80	cilia
IFT81	cilia
NEK7	cilia
NEK9	cilia
NPHP3	cilia
NPHP4	cilia
PKD2	cilia
SUFU	cilia
HOOK3	Satelite/cilia
OFD1	Satelite/cilia
PCM1	Satelite/cilia
KIF13A
